# Supplementary material for: Comprehensive Analysis of Serum Small Extracellular Vesicles-Derived Coding and Non-Coding RNAs from Retinoblastoma Patients for Identifying Regulatory Interactions
Source: Cancers (Basel). 2022 Aug 29;14(17):4179. doi: 10.3390/cancers14174179 (PMC9454787; doi:10.3390/cancers14174179)
Supplement: Supplementary file 1 [file cancers-14-04179-s001.zip]

Archive with 5 entries (5 files):
- cancer-1828690 - Supplementary Figures.pdf
- cancers-1828690 - Supplementary Tables.pdf
- File S1  Exosomal miRNA-mRNA network in RB.xls
- File S2 RB exosomal lncRNAs and lncRNA targets.xls
- File S3 RB exosomal lncRNA-miRNA-mRNA network.xls
