# Supplementary material for: Comprehensive Analysis of Serum Small Extracellular Vesicles-Derived Coding and Non-Coding RNAs from Retinoblastoma Patients for Identifying Regulatory Interactions
Source: Cancers (Basel). 2022 Aug 29;14(17):4179. doi: 10.3390/cancers14174179 (PMC9454787; doi:10.3390/cancers14174179)
Supplement: Supplementary file 1 [file cancers-14-04179-s001.zip › cancer-1828690 - Supplementary Figures.pdf]

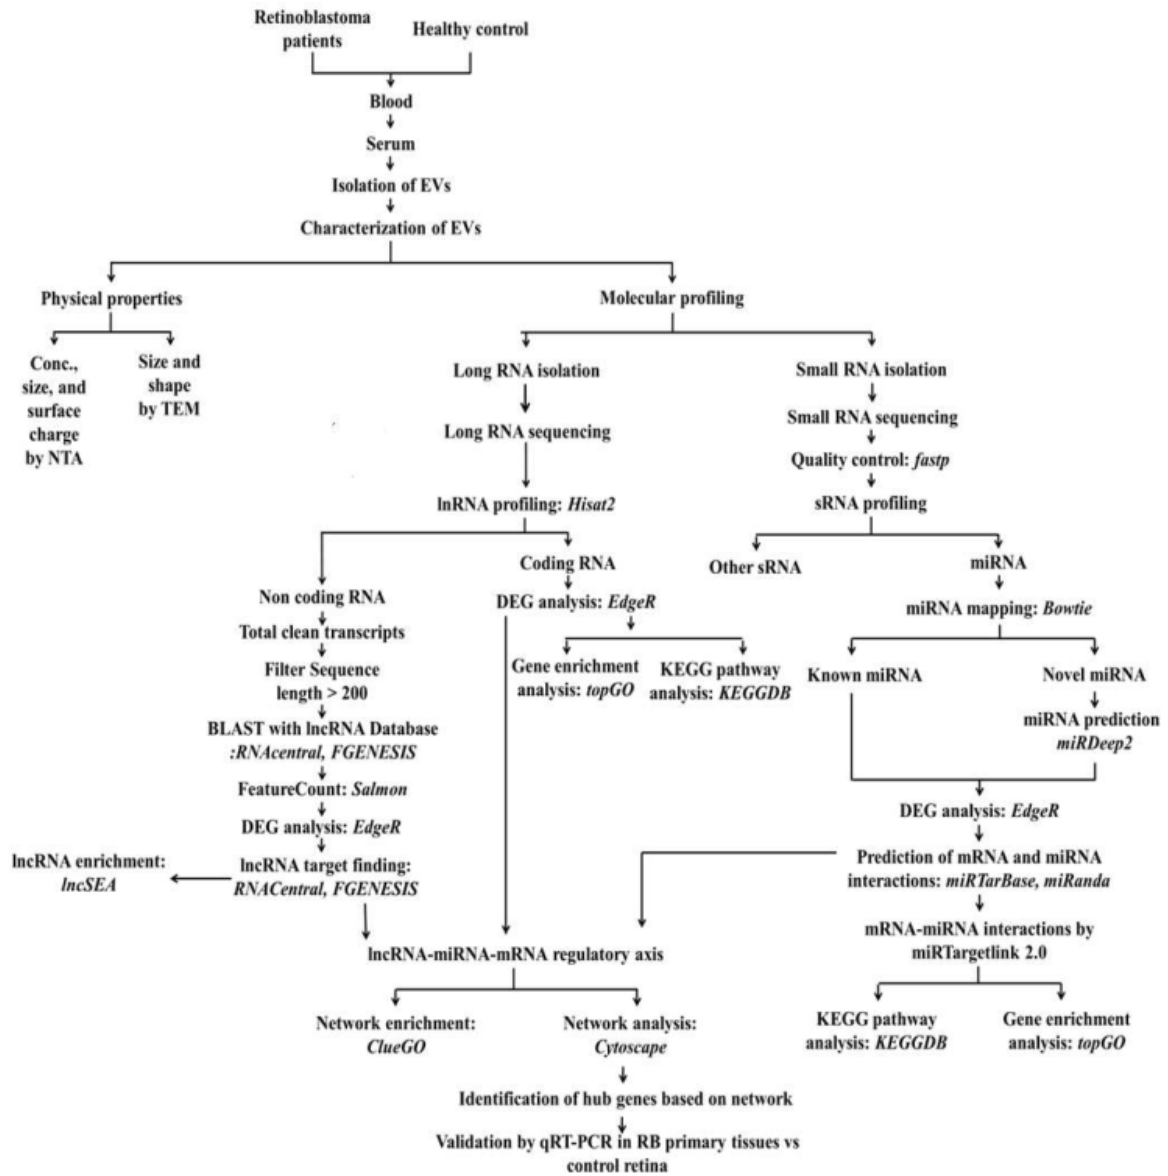

**Figure S1.** Research work flow.

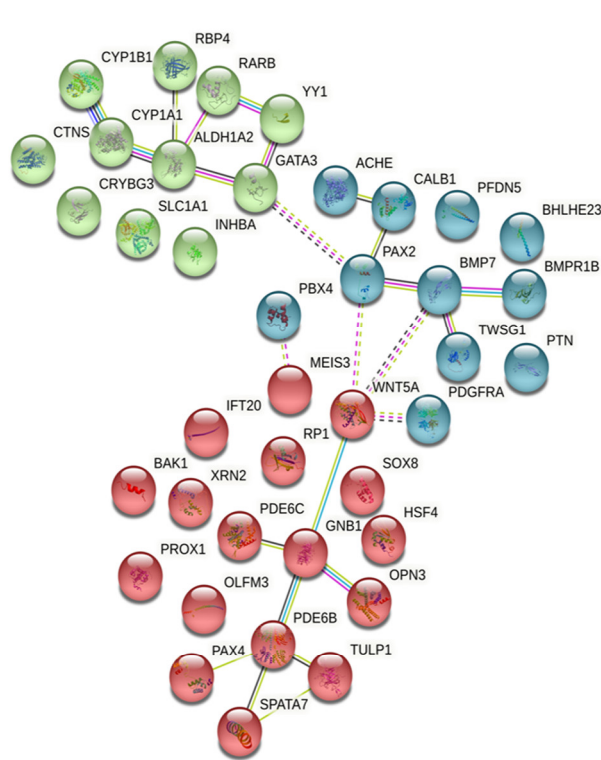

#### CLUSTER 1: 11 genes

PPI enrichment p-value: 1.39e-05

##### Biological processes

- 9-cis-retinoic acid biosynthetic process (P=0.003)
- Retinol metabolic process (FDR=3.58e-05)
- Camera-type eye development (FDR=2.00e-11)
- Secondary metabolic process (FDR=0.002)
- Lens development in camera-type eye (FDR=0.005)

#### CLUSTER 2: 11 genes

PPI enrichment p-value: 0.0007

##### Biological processes

- Embryonic camera-type eye morphogenesis (FDR=0.02)
- Retina development in camera-type eye (FDR=1.20e-09)
- Camera-type eye morphogenesis: (FDR=0.001)
- Camera-type eye development: (FDR=2.00e-11)
- Mesoderm formation (FDR=0.004)

#### CLUSTER 3: 17 genes

PPI enrichment p-value: 0.0003

##### Biological processes

- Protein localization to photoreceptor outer segment (FDR=0.01)
- Phototransduction, visible light (FDR=2.24e-06)
- Retinal rod cell differentiation (FDR=0.02)
- Retinal cone cell development (FDR=0.02)
- Camera-type eye photoreceptor cell differentiation (FDR=0.001)
- Photoreceptor cell differentiation (FDR=2.47e-08)

#### Uniprot annotated keywords

KW-0844: Vision (FDR= 7.75e-05)

KW-0716: Sensory transduction

(FDR=0.02)

KW-0682: Retinitis pigmentosa (FDR=0.01)

KW-0238: DNA-binding (FDR=0.02)

KW-0225: Disease mutation (FDR=0.02)

#### Disease gene associations:

**DOID:5614 Eye disease**

**(FDR=0.0003)**

| Known Interactions                                                                                          | Predicted Interactions                                                                                                | Others                                                                                                        |
|-------------------------------------------------------------------------------------------------------------|-----------------------------------------------------------------------------------------------------------------------|---------------------------------------------------------------------------------------------------------------|
| <ul style="list-style-type: none"> <li>from curated databases</li> <li>experimentally determined</li> </ul> | <ul style="list-style-type: none"> <li>gene neighborhood</li> <li>gene fusions</li> <li>gene co-occurrence</li> </ul> | <ul style="list-style-type: none"> <li>textmining</li> <li>co-expression</li> <li>protein homology</li> </ul> |

**Figure S2.** Protein-protein interaction (PPI) network of differentially expressed (DE) mRNAs of RB serum exosomes related to eye development. The network was constructed using string version: 11.5. K-means clustering with minimum 3 clusters settings were applied. Three clusters were generated with 11 genes in cluster 1 (green bubbles), 11 genes in cluster 2 (blue bubbles) and 9 genes in cluster 3 (red bubbles). The selected significant biological functions for each cluster with FDR values were given. Network status: Number of nodes: 39; Number of edges: 25; Average node degree: 1.28; Avg. local clustering coefficient: 0.35; PPI enrichment p-value: 4.1e-05.

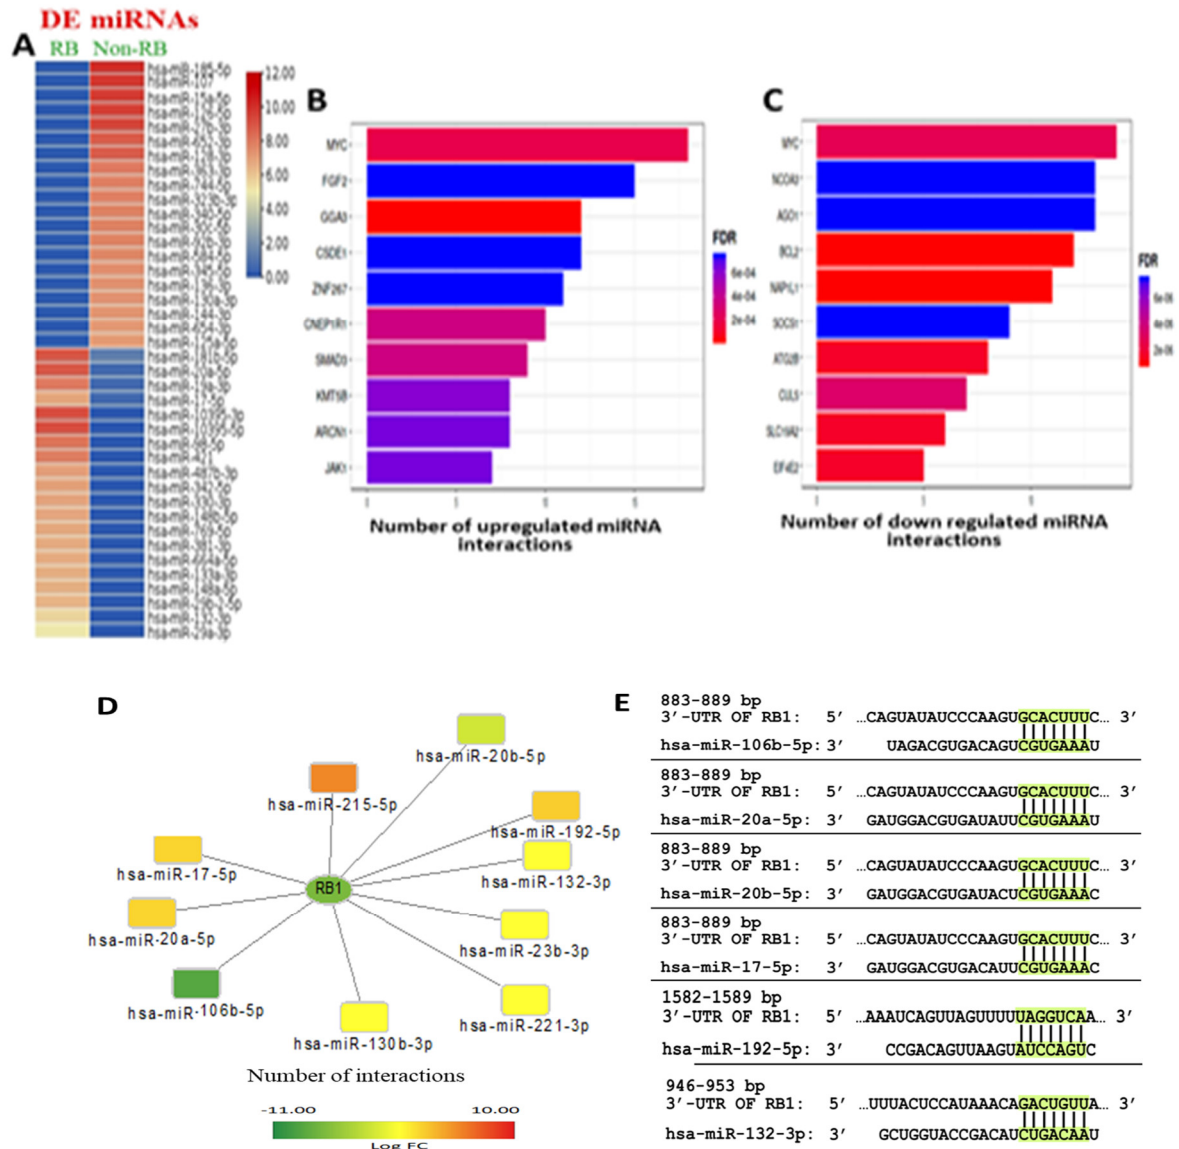

**Figure S3. A.** Heat map representing the differential expression of miRNAs in RB serum exosomes (sExos) vs non-RB. **B & C.** miRNA-target interactions in RB sExos for up regulated miRNAs and down regulated miRNAs. **D.** Cytoscape network depicting expression profiles of RB1 and its direct miRNA targets in RB sExos. **E.** Schematic illustration of the potential miRNA binding sites in 3'-UTRs of target RB1.

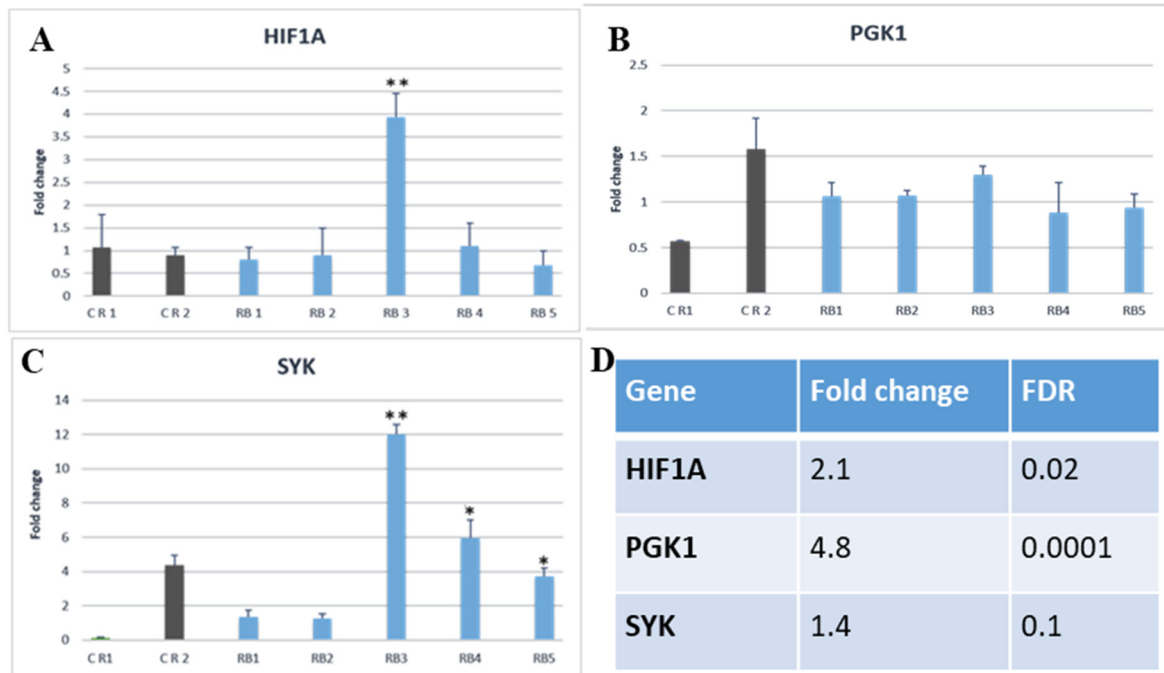

**Figure S4.** Real time expression data of A. HIF1A, B. PGK1, and C. SYK in primary retinoblastoma (RB) tumors and control retina (CR). \*=p-value<0.05 and \*\*=p-value<0.02 calculated by paired t test. E. RB vs non-RB serum exosomal gene expression by RNA seq.
