# Supplementary material for: Comprehensive Analysis of Serum Small Extracellular Vesicles-Derived Coding and Non-Coding RNAs from Retinoblastoma Patients for Identifying Regulatory Interactions
Source: Cancers (Basel). 2022 Aug 29;14(17):4179. doi: 10.3390/cancers14174179 (PMC9454787; doi:10.3390/cancers14174179)
Supplement: Supplementary file 1 [file cancers-14-04179-s001.zip › cancers-1828690 - Supplementary Tables.pdf]

**Table S1: Primers for RT-qPCR**

| Primer         | Forward                  | Reverse                  |
|----------------|--------------------------|--------------------------|
| $\beta$ -actin | TCACCCACACTGTGCCCATCTACG | CAGCGGAACCGCTCATTGCCAATG |
| SYK            | GGAAGTGAAGTCACCGCTATG    | GGGAGCGGTTAGTTCACCAC     |
| HIF1A          | CATAAAGTCTGCAACATGGAAGGT | ATTTGATGGGTGAGGAATGGGTT  |
| PGK1           | AACCAGAGGATTAAGGCTGC     | GCCTACACAGTCCTTCAAGA     |

**Table S2: Clinical characteristics of subjects included in the study**

| Sample ID | Age | Gender | Laterality      | Tumor classification | Cellular differentiation               | Health condition                              | HRF/<br>No HRF | Choroid invasion | Optic nerve involvement |
|-----------|-----|--------|-----------------|----------------------|----------------------------------------|-----------------------------------------------|----------------|------------------|-------------------------|
| C1*       | 5   | M      | NA              | NA                   | NA                                     | Healthy (Right eye injury by fall from cycle) | NA             | NA               | NA                      |
| C2*       | 5   | M      | NA              | NA                   | NA                                     | Healthy (Intermittent exotropia)              | NA             | NA               | NA                      |
| C3*       | 4   | F      | NA              | NA                   | NA                                     | Healthy (exotropia)                           | NA             | NA               | NA                      |
| C4        | 8   | F      | NA              | NA                   | NA                                     | Healthy (exotropia)                           | NA             | NA               | NA                      |
| C5        | 5   | M      | NA              | NA                   | NA                                     | Healthy (Intermittent exotropia)              | NA             | NA               | NA                      |
| RB1       | 9   | M      | Unilateral (OS) | Group E              | Poor                                   | RB                                            | HRF            | Massive          | Yes                     |
| RB2       | 1   | F      | Unilateral (OD) | Group E              | NA                                     | RB                                            | No HRF         | NA               | NA                      |
| RB3       | 2   | M      | Unilateral (OS) | Group E              | Moderately differentiated              | RB                                            | HRF            | Massive          | Yes                     |
| RB4*      | 5   | M      | Unilateral (OD) | Group D              | NA                                     | RB                                            | NA             | NA               | NA                      |
| RB5*      | 2   | M      | Unilateral (OS) | Group E              | -                                      | RB                                            | HRF            | Focal            | Yes                     |
| RB6*      | 4   | M      | Unilateral (OS) | Group E              | Undifferentiated RB with mixed pattern | RB                                            | HRF            | Massive          | No                      |
| RB7       | 4   | F      | Unilateral (OS) | Group E              | Poor                                   | RB                                            | HRF            | Massive          | No                      |
| RB8       | 1   | M      | Unilateral (OS) | Group D              | NA                                     | RB                                            | NA             | NA               | No                      |

|                |    |   |                 |         |      |               |     |         |    |
|----------------|----|---|-----------------|---------|------|---------------|-----|---------|----|
| RB9            | 4  | F | Unilateral (OS) | Group E | Poor | RB            | HRF | Massive | No |
| Control Retina | 72 | M |                 |         |      | Natural death |     |         |    |
| Control Retina | 86 | M |                 |         |      | Natural death |     |         |    |

\* RNA sequencing was performed on serum derived exosomes from these subjects. Blood was collected prior to the treatment (At the time of diagnosis)

**Table S3: The concentration, size distribution and zeta potential of serum exosomes from retinoblastoma (RB) and non-RB (control) subjects**

| Sample ID            | Concentration (particles/ml) |                      |                      | Diameter (nm) |      |            | Zeta potential (-mv)  |        |            |
|----------------------|------------------------------|----------------------|----------------------|---------------|------|------------|-----------------------|--------|------------|
| C1                   | 6.2 × 10 <sup>11</sup>       |                      |                      | 123.6         |      |            | 11.1                  |        |            |
| C2                   | 4.2 × 10 <sup>11</sup>       |                      |                      | 140.3         |      |            | 11.6                  |        |            |
| C3                   | 4.8 × 10 <sup>11</sup>       |                      |                      | 136.3         |      |            | 10.6                  |        |            |
| C4                   | 5.5×10 <sup>11</sup>         |                      |                      | 142.3         |      |            | 10.8                  |        |            |
| C5                   | 5.9×10 <sup>11</sup>         |                      |                      | 132.3         |      |            | 11.1                  |        |            |
| RB1                  | 4.3×10 <sup>11</sup>         |                      |                      | 136.4         |      |            | 12.1                  |        |            |
| RB2                  | 3.8×10 <sup>11</sup>         |                      |                      | 107.0         |      |            | 10.7                  |        |            |
| RB3                  | 5.1×10 <sup>11</sup>         |                      |                      | 128.6         |      |            | 12.0                  |        |            |
| RB4                  | 7.3×10 <sup>11</sup>         |                      |                      | 107.7         |      |            | 13.9                  |        |            |
| RB5                  | 6.2×10 <sup>11</sup>         |                      |                      | 113.5         |      |            | 10.8                  |        |            |
| RB6                  | 5.9×10 <sup>11</sup>         |                      |                      | 123.6         |      |            | 11.5                  |        |            |
| RB7                  | 4.8×10 <sup>11</sup>         |                      |                      | 142.7         |      |            | 14.2                  |        |            |
| RB8                  | 3.8×10 <sup>11</sup>         |                      |                      | 121.5         |      |            | 13.5                  |        |            |
| RB9                  | 8.0×10 <sup>11</sup>         |                      |                      | 113.8         |      |            | 15.8                  |        |            |
| Statistical Analysis |                              |                      |                      |               |      |            |                       |        |            |
|                      | Concentration (Mean)         | SD                   | Std. Error           | Size (Mean)   | SD   | Std. Error | Zeta potential (Mean) | SD     | Std. Error |
| Non-RB               | 5.3×10 <sup>11</sup>         | 0.8×10 <sup>11</sup> | 0.4×10 <sup>11</sup> | 135.0         | 7.4  | 3.3        | -11.0                 | 0.4    | 0.2        |
| RB                   | 5.5×10 <sup>11</sup>         | 1.5×10 <sup>11</sup> | 0.5×10 <sup>11</sup> | 121.6         | 12.5 | 4.2        | -12.7                 | 1.7    | 0.6        |
| p-value              |                              | 0.82                 |                      |               |      | 0.03**     |                       | 0.02** |            |

\*\* Significance level: p-value < 0.05 calculated by Welch's T-test

**Table S4: RNA-seq details of serum exosomes from retinoblastoma (RB) and non-RB subjects**

| Sample details                      | Total Sequences (millions) read count | Filtered Sequences (millions) | Total Bases (Gb) | Total bases after filtering (Gb) | Q20 (%) | Q30 (%) | Average % GC Content | Adapter trimmed (%) | Filtered reads (%) |
|-------------------------------------|---------------------------------------|-------------------------------|------------------|----------------------------------|---------|---------|----------------------|---------------------|--------------------|
| <b>Long RNA sequencing details</b>  |                                       |                               |                  |                                  |         |         |                      |                     |                    |
| RB                                  | 35.3                                  | 34.3                          | 5.7              | 4.8                              | 96.69   | 90.36   | 47.2                 | 37.8                | 97.2               |
| Non-RB                              | 40.1                                  | 38.2                          | 6.4              | 5.3                              | 96.98   | 92.25   | 49.2                 | 42.3                | 95.2               |
| <b>Small RNA sequencing details</b> |                                       |                               |                  |                                  |         |         |                      |                     |                    |
| RB                                  | 109.0                                 | 35.0                          | 5.6              | 1.5                              | 99.1    | 96.6    | 51.9                 | 48.4                | 32.1               |
| Non-RB                              | 76.9                                  | 17.4                          | 3.9              | 747.1                            | 98.9    | 96.4    | 51.9                 | 47.6                | 22.7               |

**Table S5: Top 20 up regulated mRNAs in retinoblastoma serum exosomes**

| S No | Gene                                                                        | Function                                                       | Log2 fold change | FDR      |
|------|-----------------------------------------------------------------------------|----------------------------------------------------------------|------------------|----------|
| 1    | ATP1B1 (ATPase Na <sup>+</sup> /K <sup>+</sup> Transporting Subunit Beta 1) | Ion channel transport and Cardiac conduction                   | 9.7              | 1.78E-10 |
| 2    | ANKRD7 (Ankyrin repeat domain-containing protein 7)                         | Protein binding                                                | 9.4              | 1.28E-9  |
| 3    | TRIM23 (Tripartite Motif Containing 23)                                     | E3 ubiquitin-protein ligase                                    | 9.2              | 2.9E-09  |
| 4    | PRR14 (Proline Rich 14)                                                     | Muscle organ development                                       | 9.1              | 7.4E-09  |
| 5    | DICER1 (Ribonuclease III)                                                   | Short dsRNA-mediated post-transcriptional gene silencing       | 9.1              | 1.1E-08  |
| 6    | ITGAM (Integrin Subunit Alpha M)                                            | Microglial cell activation, Immune system process              | 9.0              | 1.3E-08  |
| 7    | CEPT1(Choline/Ethanolamine Phosphotransferase 1)                            | Phosphatidylcholine and phosphatidyl ethanolamine biosynthesis | 9.0              | 1.5E-08  |
| 8    | SPATA6 (Spermatogenesis Associated 6)                                       | Involved in spermatogenesis                                    | 9.0              | 1.8E-08  |
| 9    | ZNF133 (Zinc Finger Protein 133)                                            | DNA-binding transcription factor activity                      | 8.9              | 2.5 E-08 |
| 10   | DLGAP4 (DLG Associated Protein 4)                                           | Molecular organization of synapses and neuronal cell signaling | 8.9              | 4.1E-08  |
| 11   | LPCAT2 (Lysophosphatidylcholine Acyltransferase 2)                          | Acyltransferase activity                                       | 8.9              | 4.1E-08  |
| 12   | FASTKD3 (Fas-activated serine/threonine kinase domain)                      | For normal mitochondrial respiration                           | 8.9              | 4.1E-08  |
| 13   | HIRIP3 (HIRA interacting protein 3)                                         | Chromatin assembly or disassembly                              | 8.9              | 4.1E-08  |
| 14   | ATP6V1B1 (ATPase H <sup>+</sup> Transporting V1 Subunit B1)                 | Ion channel transport                                          | 8.8              | 4.8E-08  |

|    |                                                |                                                                         |     |         |
|----|------------------------------------------------|-------------------------------------------------------------------------|-----|---------|
| 15 | LYG1 (Lysozyme G1)                             | Metabolic process                                                       | 8.8 | 5.7E-08 |
| 16 | BTG2 (BTG Anti-Proliferation Factor 2)         | Regulation of G1/S transition of the cell cycle                         | 8.8 | 5.7E-08 |
| 17 | FOLR2 (Folate Receptor Beta)                   | Folate metabolism, positive regulation of cell population proliferation | 8.8 | 5.7E-08 |
| 18 | NIMIK (NIM1 Serine/Threonine Protein Kinase)   | Serine/Threonine Protein Kinase activity                                | 8.8 | 6.5E-08 |
| 19 | CAMKMT (Calmodulin-Lysine N-Methyltransferase) | Methyltransferase activity                                              | 8.8 | 8.0E-08 |
| 20 | PSAP (Prosaposin)                              | Lipid metabolic process                                                 | 8.8 | 8.0E-08 |

**Table S6: Top 20 down regulated mRNAs in retinoblastoma serum exosomes**

| S No | Gene name                                                          | Function                                                                                                               | Log2 fold change | FDR     |
|------|--------------------------------------------------------------------|------------------------------------------------------------------------------------------------------------------------|------------------|---------|
| 1    | TTC19 (Tetratricopeptide Repeat Domain 19)                         | Maintain functional integrity of mitochondrial respiratory complex III                                                 | -8.83            | 4.8E-08 |
| 2    | TRIOBP (TRIO And F-Actin Binding Protein)                          | Ubiquitin protein ligase binding                                                                                       | -8.8             | 6.5E-08 |
| 3    | LIG3 (DNA Ligase 3)                                                | DNA strand-break repair, mitochondrial base-excision DNA repair                                                        | -8.7             | 9.6E-08 |
| 4    | DOT1L (DOT1 Like Histone Lysine Methyltransferase)                 | transcription factor binding, histone methyltransferase activity                                                       | -8.5             | 3.2E-07 |
| 5    | UPF1 (RNA Helicase And ATPase)                                     | mRNA nuclear export and mRNA surveillance                                                                              | -8.5             | 4.8E-07 |
| 6    | RPS6KA2 (Ribosomal Protein S6 Kinase A2)- serine/threonine kinases | Acts downstream of ERK (MAPK1/ERK2 and MAPK3/ERK1) signaling Tumor suppressor in epithelial ovarian cancer cells       | -8.5             | 4.8E-07 |
| 7    | PPP1R9 Protein Phosphatase 1 Regulatory Subunit 9B                 | Putative tumor suppressor function, ERK signaling                                                                      | -8.4             | 7.6E-07 |
| 8    | CEP76 (Centrosomal Protein 76)                                     | Regulation of G2/M transition of mitotic cell cycle                                                                    | -8.4             | 9.6E-07 |
| 9    | SMPD3 (Sphingomyelin Phosphodiesterase 3)                          | Signaling by GPCR and IL-2 Pathway                                                                                     | -8.4             | 9.6E-07 |
| 10   | PPP2R5B Protein Phosphatase 2 Regulatory Subunit B'Beta            | RET and ERK signaling, Ser/Thr phosphatases                                                                            | -8.3             | 1.8E-06 |
| 11   | MAP3K20 Mitogen-Activated Protein Kinase 20                        | MAPKKK family of signal transduction , regulation of S and G2 cell cycle checkpoint by direct phosphorylation of CHEK2 | -8.3             | 1.8E-06 |
| 12   | AKAP8 (A-Kinase Anchoring Protein 8)                               | Cell cycle Chromosome condensation in prometaphase and Activation of cAMP-                                             | -8.1             | 1.2E-07 |

|    |                                                                               |                                                                                                        |      |         |
|----|-------------------------------------------------------------------------------|--------------------------------------------------------------------------------------------------------|------|---------|
|    |                                                                               | Dependent PKA                                                                                          |      |         |
| 13 | PPP2R5C Protein Phosphatase 2 Regulatory Subunit B'Gamma Ser/Thr phosphatases | Implicated in the negative control of cell growth and division                                         | -8.0 | 1.7E-07 |
| 14 | SEH1L (SEH1 Like Nucleoporin), Nup107-160 Subcomplex Subunit SEH1             | Required for normal kinetochore microtubule attachment, mitotic progression and chromosome segregation | -7.9 | 3.5E-07 |
| 15 | TSG101 Tumor Susceptibility 101, Component of the ESCRT-I complex             | Regulator of vesicular trafficking process                                                             | -7.9 | 5.0E-07 |
| 16 | CCNJ (Cyclin J)                                                               | Cyclin-dependent protein serine/threonine kinase regulator activity                                    | -7.8 | 3.1E-05 |
| 17 | RBBP8 (RB Binding Protein 8, Endonuclease)                                    | RB binding protein, Transcriptional regulation, DNA repair, and/or cell cycle checkpoint control       | -7.8 | 4.3E-05 |
| 18 | CDC6 (Cell Division Cycle 6)                                                  | E2F mediated regulation of DNA replication                                                             | -7.7 | 2.4E-06 |
| 19 | PPP5C (Protein Phosphatase 5 Catalytic Subunit)                               | Regulation of cell growth and differentiation                                                          | -7.6 | 3.6E-06 |
| 20 | TRIP13(Thyroid Hormone Receptor Interactor 13)                                | Transcription co-regulator activity                                                                    | -7.6 | 3.6E-06 |

**Table S7: Top 20 upregulated miRNAs in retinoblastoma serum exosomes**

|    | Gene name        | Log2 FC | FDR      | miR family | Chromosome location            | Number of target genes dysregulated in RB serum exosomes |
|----|------------------|---------|----------|------------|--------------------------------|----------------------------------------------------------|
| 1  | hsa-miR-10395-3p | 12.4    | 9.32E-29 | -          | chr19: 12703601-12703664 [-]   | -                                                        |
| 2  | hsa-miR-10395-5p | 12.4    | 9.32E-29 | -          | chr19: 12703601-12703664 [-]   | -                                                        |
| 3  | hsa-miR-98-5p*   | 11.4    | 2.34E-22 | let-7      | chrX: 53557192-53557274 [-]    | 574                                                      |
| 4  | hsa-miR-421      | 11.2    | 1.31E-20 | mir-95     | chrX: 74218377-74218461 [-]    | 182                                                      |
| 5  | hsa-miR-487b-3p  | 10.2    | 5.56E-15 | mir-154    | chr14: 101046455-101046538 [+] | 17                                                       |
| 6  | hsa-miR-342-5p   | 10.2    | 9.82E-15 | mir-342    | chr14: 100109655-100109753 [+] | 89                                                       |
| 7  | hsa-miR-330-3p   | 10.1    | 2.13E-14 | mir-330    | chr19: 45638994-45639087 [-]   | 104                                                      |
| 8  | hsa-miR-148b-5p  | 10.1    | 5.64E-14 | mir-148    | chr12: 54337216-54337314 [+]   | 40                                                       |
| 9  | hsa-miR-769-5p   | 10.0    | 1.17E-13 | mir-769    | chr19: 46018932-46019049 [+]   | 149                                                      |
| 10 | hsa-miR-381-3p   | 9.9     | 2.03E-13 | mir-154    | chr14: 101045920-101045994 [+] | 98                                                       |
| 11 | hsa-miR-664a-5p  | 9.9     | 2.79E-13 | mir-664    | chr1: 220200538-220200619 [-]  | 90                                                       |
| 12 | hsa-miR-133a-3p  | 9.8     | 5.71E-13 | mir-133    | chr18: 21825698-21825785 [-]   | 85                                                       |
| 13 | hsa-miR-148a-5p  | 9.8     | 1.26E-12 | -          | -                              | 62                                                       |
| 14 | hsa-miR-29b-2-5p | 9.7     | 5.30E-12 | mir-29     | chr1: 207802443-207802523 [-]  | 88                                                       |
| 15 | hsa-miR-20a-5p*  | 9.5     | 2.19E-27 | miR-17     | chr13: 91351065-91351135 [+]   | 959                                                      |
| 16 | hsa-miR-132-3p   | 8.8     | 4.63E-08 | mir-132    | chr17: 2049908-2050008 [-]     | 174                                                      |
| 17 | hsa-miR-19a-3p*  | 8.6     | 3.76E-21 | mir-19     | chr13: 91350891-91350972 [+]   | 561                                                      |
| 18 | hsa-miR-29a-3p   | 8.3     | 6.66E-06 | mir-29     | chr7: 130876747-130876810 [-]  | 178                                                      |

|    |                 |     |          |         |                               |      |
|----|-----------------|-----|----------|---------|-------------------------------|------|
| 19 | hsa-miR-181b-5p | 8.2 | 1.27E-27 | mir-181 | chr1: 198858873-198858982 [-] | 343  |
| 20 | hsa-miR-17-5p*  | 7.5 | 4.13E-14 | miR-17  | chr13: 91350605-91350688 [+]  | 1022 |

\*miRNAs that are expressed in retinoblastoma tumor tissues

**Table S8: Top 20 down regulated miRNAs in retinoblastoma serum exosomes**

| S. No | Gene name       | Log2 (fold change) | FDR      | miR family | Chromosome location            | Number of gene interactions |
|-------|-----------------|--------------------|----------|------------|--------------------------------|-----------------------------|
| 1     | hsa-miR-185-5p  | -13.3              | 4.92E-30 | mir-185    | chr22: 20033139-20033220 [+]   | 269                         |
| 2     | hsa-miR-107     | -13.0              | 1.38E-28 | mir-103    | chr10: 89592747-89592827 [-]   | 281                         |
| 3     | hsa-miR-15a-5p  | -12.9              | 4.97E-28 | mir-15     | chr13: 50049119-50049201 [-]   | 674                         |
| 4     | hsa-miR-126-5p  | -12.8              | 2.46E-27 | mir-126    | chr9: 136670602-136670686 [+]  | 102                         |
| 5     | hsa-miR-27b-3p  | -12.6              | 2.16E-26 | mir-27     | chr9: 95085445-95085541 [+]    | 359                         |
| 6     | hsa-miR-652-3p  | -12.1              | 2.34E-22 | mir-652    | chrX: 110055329-110055426 [+]  | 133                         |
| 7     | hsa-miR-128-3p  | -12.0              | 4.39E-22 | mir-128    | chr2: 135665397-135665478 [+]  | 434                         |
| 8     | hsa-miR-363-3p  | -11.2              | 5.86E-18 | mir-363    | chrX: 134169378-134169452 [-]  | 337                         |
| 9     | hsa-miR-744-5p  | -11.1              | 4.60E-17 | mir-744    | chr17: 12081899-12081996 [+]   | 317                         |
| 10    | hsa-miR-323b-3p | -11.1              | 7.58E-17 | mir-154    | chr14: 101056219-101056300 [+] | 34                          |
| 11    | hsa-miR-340-5p  | -11.0              | 8.70E-17 | mir-340    | chr5: 180015303-180015397 [-]  | 304                         |
| 12    | hsa-miR-30c-5p  | -11.0              | 1.00E-16 | mir-30     | chr6: 71376960-71377031 [-]    | 402                         |
| 13    | hsa-miR-92b-3p  | -10.9              | 1.70E-16 | mir-25     | chr1: 155195177-155195272 [+]  | 638                         |
| 14    | hsa-miR-584-5p  | -10.8              | 7.98E-16 | mir-584    | chr5: 149062313-149062409 [-]  | 60                          |
| 15    | hsa-miR-345-5p  | -10.7              | 6.76E-15 | mir-345    | chr14: 100307859-100307956 [+] | 31                          |
| 16    | hsa-miR-136-3p  | -10.6              | 1.92E-14 | mir-136    | chr14: 100884702-100884783 [+] | 40                          |
| 17    | hsa-miR-130a-3p | -10.6              | 2.80E-14 | mir-130    | chr11: 57641198-57641286 [+]   | 392                         |
| 18    | hsa-miR-144-3p  | -10.5              | 5.48E-14 | mir-144    | chr17: 28861533-28861618 [-]   | 187                         |
| 19    | hsa-miR-654-3p  | -10.4              | 2.26E-13 | mir-654    | chr14: 101040219-101040299 [+] | 51                          |
| 20    | hsa-miR-125a-5p | -10.4              | 3.56E-13 | mir-10     | chr19: 51693254-51693339 [+]   | 220                         |

**Table S9: Dysregulated microRNAs identified in RB serum exosomes and their expression in RB tumor tissues from review of literature**

| S No | miRNA        | Zhao et al 2009 (RB vs retina) [26] | Conkrite et al 2011 (RB vs FW18 retina) [27] | Huang et al 2007 (RB vs retina) [28] | Beta et al 2019 Insilico analysis RB vs control serum [29] | Present study RB vs non-RB serum exosomes |
|------|--------------|-------------------------------------|----------------------------------------------|--------------------------------------|------------------------------------------------------------|-------------------------------------------|
| 1    | hsa-miR17-5p |                                     | neutral                                      | up                                   |                                                            | up                                        |
| 2    | hsa-miR-20a  |                                     |                                              | up                                   |                                                            | 20a-5p up                                 |
| 3    | miR-106b     |                                     | neutral                                      |                                      | up                                                         | 106b-5p-down<br>106b-3p-neutral           |
| 4    | miR-93       |                                     |                                              |                                      | up                                                         | 93-5p -neutral                            |
| 5    | miR-16       |                                     | up                                           |                                      | up                                                         | 16-5p-up                                  |
| 6    | hsa-let-7a   | neutral                             |                                              | down                                 |                                                            | 7a-3p -down                               |

|    |             |         |      |      |         |                             |
|----|-------------|---------|------|------|---------|-----------------------------|
|    |             |         |      |      |         | 7a-5p -up                   |
| 7  | let-7b      |         |      | down |         | 7b-5p- neutral              |
| 8  | hsa-let-7c  | neutral |      | down |         | 7c-5p-up                    |
| 9  | hsa-let-7d  |         |      |      | down    | 7d-3p-down<br>7d-5p-neutral |
| 10 | hsa-let-7e  |         |      |      | down    | 7e-5p -down                 |
| 11 | hsa-let-7f  |         | down |      | down    | 7f-5p-up                    |
| 12 | miR-25      |         | up   | up   |         | 25-3p-down                  |
| 13 | miR-142-5p  |         |      |      |         | up                          |
| 14 | miR-324-5p  | neutral |      |      |         | up                          |
| 15 | miR-29a     | down    |      |      |         | 29a-3p-up                   |
| 16 | miR-182     |         | up   | down |         | 182-5p-up                   |
| 17 | hsa-miR-101 |         |      |      |         |                             |
| 18 | miR-148b    |         | up   |      |         | 148b-5p-up<br>148b-3p-down  |
| 19 | miR-143     |         | up   |      |         | 143-3p down                 |
| 20 | miR-19a     |         |      |      | Up (RL) | 19a-3p-up                   |
| 21 | miR-19b     |         |      |      | neutral | 19b-3p-up                   |
| 22 | miR-181a    |         |      | down |         | 181a-5p- up<br>181a-3p-down |
| 23 | miR-221     |         |      |      | down    | 221-3p-down                 |

Note: Previous papers not specified the arm specific miRNAs expression (5p-arm or 3p-arm). Thus, to avoid ambiguity we have listed expression profiles of both their expression.

**Table S10: Dysregulated lncRNAs identified in retinoblastoma (RB) serum exosomes and their expression in RB tumor tissues from review of literature**

| S No | lncRNA    | Up/down regulated | RB tissues/cell lines                         | Ref  | Expression status in RB vs non-RB exos (Fold change) |
|------|-----------|-------------------|-----------------------------------------------|------|------------------------------------------------------|
| 1    | AFAP1-AS1 | Up                | RB tissue                                     | [30] | Up (5.94)                                            |
| 2    | BANCR     | Up                | RB tissue                                     | [31] | Up (4.0)                                             |
| 3    | BDNF-AS   | down              | RB tissue                                     | [32] | Up (2.5)                                             |
| 4    | HOTAIR    | Up                | RB tissues, RB cell lines (HXO-RB44, and Y79) | [33] | Up (1.6)                                             |

|    |           |      |                                                                            |      |                |
|----|-----------|------|----------------------------------------------------------------------------|------|----------------|
| 5  | MALAT1    | Up   | RB tissues, RB cell lines (ARPE-19, HXO-RB44, WERI-RB-1, SO-RB50, and Y79) | [34] | Down (-6.9)    |
| 6  | MEG3      | Down | RB tumor tissues                                                           | [35] | Neutral (1.7)  |
| 7  | NEAT1     | Up   | RB tissues, RB cell lines (Y79, Weri-Rb1, and SO-RB50)                     | [36] | Neutral (-1.4) |
| 8  | XIST      | Up   | RB tissues                                                                 | [37] | Neutral (1.0)  |
| 9  | ELFN1-AS1 | Up   | RB tissues and RB cell lines                                               | [38] | Down (-5.9)    |
| 10 | PANDAR    | Up   | RB tissues and WERI-Rb1, Y79, SO-Rb50 and HXO-RB44 cells                   | [39] | Neutral (-4.9) |
| 11 | UCA1      | Up   | Carboplatin resistant RB cells developed from WERI-RB-1 and Y79 cells      | [40] | Neural (-3.9)  |
| 12 | DANCR     | Up   | RB tissues and cell lines                                                  | [41] | Neutral (0.1)  |
| 13 | FEZF1-AS1 | Up   | Y79                                                                        | [42] | UP (2.4)       |
| 14 | SNHG-16   | Up   | RB tissues and WERI-RB1, SO-RB50, Y79                                      | [43] | Down (-2.3)    |
