# Supplementary material for: Comprehensive Analysis of Serum Small Extracellular Vesicles-Derived Coding and Non-Coding RNAs from Retinoblastoma Patients for Identifying Regulatory Interactions
Source: Cancers (Basel). 2022 Aug 29;14(17):4179. doi: 10.3390/cancers14174179 (PMC9454787; doi:10.3390/cancers14174179)
Supplement: Supplementary file 1 [file cancers-14-04179-s001.zip › File S1 Exosomal miRNA-mRNA network in RB.xls]

## Sheet: Sheet1
miRTargetLink 2.0
miRNA	Target / Target pathway	Support	Source	Experiment(s)	Reference - PMID
hsa-let-7a-3p	CCND1	Functional MTI	MIRT734951	Luciferase reporter assay	25702703
hsa-let-7a-5p	MYC	Functional MTI	MIRT000417	Western blot	20033209
hsa-let-7a-5p	MYC	Functional MTI	MIRT000417	qRT-PCR, Western blot	16651716
hsa-let-7a-5p	HMGA2	Functional MTI	MIRT002323	Immunofluorescence, Immunohistochemistry, Luciferase reporter assay, qRT-PCR, Western blot	24617339
hsa-let-7a-5p	HMGA2	Functional MTI	MIRT002323	Luciferase reporter assay, qRT-PCR, Western blot	25884389
hsa-let-7a-5p	HMGA2	Functional MTI	MIRT002323	qRT-PCR, Western blot, Luciferase reporter assay	17600087
hsa-let-7a-5p	HMGA2	Functional MTI	MIRT002323	Luciferase reporter assay	18083101
hsa-let-7a-5p	HMGA2	Functional MTI	MIRT002323	Luciferase reporter assay	17322030
hsa-let-7a-5p	HMGA2	Functional MTI	MIRT002323	Luciferase reporter assay	18413822
hsa-let-7a-5p	HMGA2	Functional MTI	MIRT002323	Luciferase reporter assay, Western blot, qRT-PCR	19179606
hsa-let-7a-5p	HMGA2	Functional MTI	MIRT002323	Luciferase reporter assay, qRT-PCR, Western blot	22139073
hsa-let-7a-5p	CCND2	Functional MTI	MIRT005478	Luciferase reporter assay, qRT-PCR, Western blot	20418948
hsa-let-7a-5p	CCND2	Functional MTI	MIRT005478	qRT-PCR, Western blot	26393798
hsa-let-7a-5p	CDKN1A	Functional MTI	MIRT032506	Western blot	19818775
hsa-let-7a-5p	STAT3	Functional MTI	MIRT734721	qRT-PCR, Western blot	27932893
hsa-let-7b-5p	CCND1	Functional MTI	MIRT002484	Immunoblot, Immunofluorescence, Luciferase reporter assay, qRT-PCR, Reporter assay;Other	18379589
hsa-let-7b-5p	CCND1	Functional MTI	MIRT002484	immunoblot, Luciferase reporter assay, Northern blot, Western blot	20133835
hsa-let-7b-5p	CCND1	Functional MTI	MIRT002484	Immunoblot, Microarray, qRT-PCR, Western blot, Annexin V-FITC	23806108
hsa-let-7c-5p	HMGA2	Functional MTI	MIRT002322	qRT-PCR, Western blot, Luciferase reporter assay	17600087
hsa-let-7c-5p	HMGA2	Functional MTI	MIRT002322	Microarray, Northern blot, qRT-PCR, Western blot	17243163
hsa-let-7c-5p	HMGA2	Functional MTI	MIRT002322	Luciferase reporter assay, qRT-PCR, Western blot	18403645
hsa-let-7c-5p	HMGA2	Functional MTI	MIRT002322	Immunocytochemistry, Immunofluorescence, Luciferase reporter assay, qRT-PCR, Western blot	21224353
hsa-let-7c-5p	MYC	Functional MTI	MIRT003748	Luciferase reporter assay, Northern blot, Western blot	17877811
hsa-let-7c-5p	STAT3	Functional MTI	MIRT732605	Luciferase reporter assay	26851791
hsa-let-7e-5p	CCND1	Functional MTI	MIRT006122	Luciferase reporter assay, qRT-PCR, Western blot	21969366
hsa-let-7e-5p	CCND1	Functional MTI	MIRT006122	qRT-PCR, Western blot	24100610
hsa-let-7e-5p	MYCN	Functional MTI	MIRT032100	Reporter assay	21654684
hsa-let-7e-5p	MYCN	Functional MTI	MIRT032100	Luciferase reporter assay, Microarray, qRT-PCR, Western blot	23774216
hsa-let-7f-5p	CCND1	Functional MTI	MIRT032092	Luciferase reporter assay	22894925
hsa-let-7g-5p	MYC	Functional MTI	MIRT000475	qRT-PCR, Luciferase reporter assay, Western blot, Western blot;qRT-PCR;Other	20309945
hsa-miR-1-3p	CCND1	Functional MTI	MIRT023800	Luciferase reporter assay, qRT-PCR, Western blot	27247259
hsa-miR-101-3p	MYCN	Functional MTI	MIRT000378	Luciferase reporter assay, Reporter assay	14697198
hsa-miR-101-3p	MYCN	Functional MTI	MIRT000378	Reporter assay	21654684
hsa-miR-101-3p	CCND1	Functional MTI	MIRT734413	Western blot	26286725
hsa-miR-103a-3p	MYCN	Functional MTI	MIRT733041	Luciferase reporter assay	27764804
hsa-miR-106a-5p	CDKN1A	Functional MTI	MIRT001223	qRT-PCR, Luciferase reporter assay, Western blot, Reporter assay;Other	18212054
hsa-miR-106a-5p	CDKN1A	Functional MTI	MIRT001223	Luciferase reporter assay, Western blot	19782699
hsa-miR-106a-5p	CDKN1A	Functional MTI	MIRT001223	qRT-PCR, Luciferase reporter assay, Western blot	20190813
hsa-miR-106a-5p	CDKN1A	Functional MTI	MIRT001223	qRT-PCR, Luciferase reporter assay, Western blot, Microarray	20385818
hsa-miR-106a-5p	RB1	Functional MTI	MIRT001840	Immunohistochemistry, Microarray, Western blot	20643754
hsa-miR-106a-5p	RB1	Functional MTI	MIRT001840	Luciferase reporter assay, Microarray, Western blot, Reporter assay	16461460
hsa-miR-106a-5p	RB1	Functional MTI	MIRT001840	Luciferase reporter assay, qRT-PCR, Western blot	20889678
hsa-miR-106a-5p	CCND1	Functional MTI	MIRT053230	qRT-PCR, Western blot	23836497
hsa-miR-106b-5p	CDKN1A	Functional MTI	MIRT000603	Luciferase reporter assay, qRT-PCR	18676839
hsa-miR-106b-5p	CDKN1A	Functional MTI	MIRT000603	Luciferase reporter assay, Microarray, Western blot	18328430
hsa-miR-106b-5p	CDKN1A	Functional MTI	MIRT000603	qRT-PCR, Luciferase reporter assay, Western blot	19153141
hsa-miR-106b-5p	CDKN1A	Functional MTI	MIRT000603	qRT-PCR, Luciferase reporter assay, Western blot	18212054
hsa-miR-106b-5p	CDKN1A	Functional MTI	MIRT000603	qRT-PCR, Luciferase reporter assay, Western blot	20190813
hsa-miR-106b-5p	CDKN1A	Functional MTI	MIRT000603	qRT-PCR, Luciferase reporter assay, Western blot, Microarray	20385818
hsa-miR-106b-5p	CDKN1A	Functional MTI	MIRT000603	Luciferase reporter assay, Microarray, qRT-PCR, Western blot	19422085
hsa-miR-106b-5p	CDKN1A	Functional MTI	MIRT000603	Luciferase reporter assay	20101223
hsa-miR-106b-5p	CDKN1A	Functional MTI	MIRT000603	Luciferase reporter assay	21283765
hsa-miR-106b-5p	CDKN1A	Functional MTI	MIRT000603	Reporter assay;Western blot;qRT-PCR	20709030
hsa-miR-106b-5p	CDKN1A	Functional MTI	MIRT000603	qRT-PCR, Western blot	23803041
hsa-miR-106b-5p	CDKN1A	Functional MTI	MIRT000603	Luciferase reporter assay, qRT-PCR, Western blot	26238857
hsa-miR-106b-5p	VEGFA	Functional MTI	MIRT004466	ELISA, Luciferase reporter assay	18320040
hsa-miR-106b-5p	BCL2L11	Functional MTI	MIRT004571	Flow, Luciferase reporter assay, qRT-PCR, Western blot	23028803
hsa-miR-106b-5p	RB1	Functional MTI	MIRT004664	Luciferase reporter assay	21283765
hsa-miR-106b-5p	RB1	Functional MTI	MIRT004664	Luciferase reporter assay, qRT-PCR, Western blot	21819631
hsa-miR-106b-5p	RB1	Functional MTI	MIRT004664	Luciferase reporter assay, Microarray, Western blot	24292682
hsa-miR-106b-5p	CCND1	Functional MTI	MIRT005861	Luciferase reporter assay	21283765
hsa-miR-106b-5p	CCND2	Functional MTI	MIRT005862	Luciferase reporter assay	21283765
hsa-miR-106b-5p	PTEN	Functional MTI	MIRT005865	Luciferase reporter assay	21283765
hsa-miR-106b-5p	PTEN	Functional MTI	MIRT005865	Immunofluorescence, Luciferase reporter assay, Microarray, qRT-PCR, Western blot	24842611
hsa-miR-106b-5p	PTEN	Functional MTI	MIRT005865	qRT-PCR, Luciferase reporter assay, Immunohistochemistry, Western blot	25041637
hsa-miR-106b-5p	PTEN	Functional MTI	MIRT005865	Luciferase reporter assay, qRT-PCR, Western blot	27270534
hsa-miR-106b-5p	PTEN	Functional MTI	MIRT005865	Luciferase reporter assay, qRT-PCR, Western blot	26238857
hsa-miR-106b-5p	WEE1	Functional MTI	MIRT005868	Luciferase reporter assay	21283765
hsa-miR-106b-5p	PURA	Functional MTI	MIRT007004	Luciferase reporter assay	22835829
hsa-miR-106b-5p	STAT3	Functional MTI	MIRT054144	Luciferase reporter assay, qRT-PCR, Western blot	25307786
hsa-miR-106b-5p	STAT3	Functional MTI	MIRT054144	Flow, Luciferase reporter assay, qRT-PCR, Western blot	26956882
hsa-miR-106b-5p	STAT3	Functional MTI	MIRT054144	Luciferase reporter assay, qRT-PCR, Western blot	27325313
hsa-miR-106b-5p	HIF1A	Functional MTI	MIRT070745	Luciferase reporter assay, qRT-PCR, Western blot	27325313
hsa-miR-10b-5p	CDKN1A	Functional MTI	MIRT006369	Luciferase reporter assay, Western blot	21471404
hsa-miR-10b-5p	TP53	Functional MTI	MIRT006923	Luciferase reporter assay	23034333
hsa-miR-1228-3p	TP53	Functional MTI	MIRT732482	qRT-PCR, Luciferase reporter assay, Immunohistochemistry, Western blot	25422913
hsa-miR-125a-3p	BRCA1	Functional MTI	MIRT732879	Luciferase reporter assay, qRT-PCR, Western blot	27693788
hsa-miR-125a-5p	CDKN1A	Functional MTI	MIRT000602	qRT-PCR, Luciferase reporter assay, Western blot	20190813
hsa-miR-125a-5p	TP53	Functional MTI	MIRT004071	Luciferase reporter assay, Northern blot, qRT-PCR, Western blot	19818772
hsa-miR-125a-5p	TP53	Functional MTI	MIRT004071	qRT-PCR, Western blot	26017674
hsa-miR-125a-5p	E2F3	Functional MTI	MIRT734757	Flow, Luciferase reporter assay, qRT-PCR, Western blot	25733534
hsa-miR-125b-1-3p	TP53	Functional MTI	MIRT733498	Luciferase reporter assay	27592685
hsa-miR-125b-5p	TP53	Functional MTI	MIRT000535	Luciferase reporter assay, qRT-PCR, Western blot	21935352
hsa-miR-125b-5p	TP53	Functional MTI	MIRT000535	Luciferase reporter assay	23497288
hsa-miR-125b-5p	TP53	Functional MTI	MIRT000535	Luciferase reporter assay, Western blot	22331826
hsa-miR-125b-5p	TP53	Functional MTI	MIRT000535	Next Generation Sequencing (NGS), qRT-PCR, Western blot	26585673
hsa-miR-125b-5p	TP53	Functional MTI	MIRT000535	Luciferase reporter assay, Western blot	20216554
hsa-miR-125b-5p	TP53	Functional MTI	MIRT000535	In situ hybridization, Luciferase reporter assay, qRT-PCR, Western blot, Reporter assay;qRT-PCR;Other	19293287
hsa-miR-125b-5p	E2F3	Functional MTI	MIRT005503	Immunohistochemistry, Luciferase reporter assay, Northern blot, qRT-PCR, Western blot, Reporter assay;Other	20549700
hsa-miR-125b-5p	E2F3	Functional MTI	MIRT005503	Immunohistochemistry, qRT-PCR, Western blot	22523546
hsa-miR-126-5p	MYC	Functional MTI	MIRT438621	Immunoblot, Luciferase reporter assay, qRT-PCR	22972034
hsa-miR-126-5p	CYLD	Functional MTI	MIRT735125	ELISA, Luciferase reporter assay, qRT-PCR, Western blot	28250134
hsa-miR-128-1-5p	E2F3	Functional MTI	MIRT734516	Luciferase reporter assay, qRT-PCR, Western blot	27705931
hsa-miR-128-3p	E2F3	Functional MTI	MIRT003734	Luciferase reporter assay	18810376
hsa-miR-128-3p	E2F3	Functional MTI	MIRT003734	Luciferase reporter assay	19013014
hsa-miR-128-3p	WEE1	Functional MTI	MIRT006099	GFP reporter assay, Luciferase reporter assay, qRT-PCR	21358821
hsa-miR-128-3p	PTEN	Functional MTI	MIRT053069	Luciferase reporter assay, qRT-PCR, Western blot	24132591
hsa-miR-1285-3p	TP53	Functional MTI	MIRT005474	Luciferase reporter assay, qRT-PCR, Western blot	20417621
hsa-miR-129-2-3p	MYC	Functional MTI	MIRT735344	Immunoblot, Luciferase reporter assay	26180082
hsa-miR-130a-3p	XIAP	Functional MTI	MIRT438510	Luciferase reporter assay	24145606
hsa-miR-130a-3p	MYC	Functional MTI	MIRT731172	Luciferase reporter assay	25544755
hsa-miR-130b-3p	TP53INP1	Functional MTI	MIRT000335	Luciferase reporter assay, Western blot	18974142
hsa-miR-130b-3p	STAT3	Functional MTI	MIRT053071	Luciferase reporter assay, qRT-PCR, Western blot	24040078
hsa-miR-130b-3p	PTEN	Functional MTI	MIRT054460	Luciferase reporter assay	24220575
hsa-miR-130b-3p	PTEN	Functional MTI	MIRT054460	Luciferase reporter assay	26837847
hsa-miR-130b-3p	PTEN	Functional MTI	MIRT054460	Luciferase reporter assay	25637514
hsa-miR-130b-3p	CYLD	Functional MTI	MIRT732122	Luciferase reporter assay, qRT-PCR, Western blot	26711782
hsa-miR-132-3p	CDKN1A	Functional MTI	MIRT000601	qRT-PCR, Luciferase reporter assay, Western blot	20190813
hsa-miR-132-3p	RB1	Functional MTI	MIRT006503	Luciferase reporter assay, Western blot, Reporter assay;Western blot;qRT-PCR	21329664
hsa-miR-135a-5p	MYC	Functional MTI	MIRT007105	Luciferase reporter assay, Western blot	23176581
hsa-miR-138-5p	CCND1	Functional MTI	MIRT053080	Immunohistochemistry, Luciferase reporter assay, Microarray, qRT-PCR, Western blot	22739938
hsa-miR-141-3p	E2F3	Functional MTI	MIRT021649	Western blot	20053927
hsa-miR-141-3p	E2F3	Functional MTI	MIRT021649	Luciferase reporter assay, qRT-PCR, Western blot	26233544
hsa-miR-145-5p	CDKN1A	Functional MTI	MIRT000575	Microarray, qRT-PCR, Western blot	26540468
hsa-miR-145-5p	MYC	Functional MTI	MIRT004290	qRT-PCR, Luciferase reporter assay, Western blot	19202062
hsa-miR-145-5p	MYC	Functional MTI	MIRT004290	Luciferase reporter assay, qRT-PCR, Western blot	21092188
hsa-miR-145-5p	MYC	Functional MTI	MIRT004290	qRT-PCR, Western blot	23710609
hsa-miR-145-5p	MYC	Functional MTI	MIRT004290	Microarray, qRT-PCR, Western blot	26540468
hsa-miR-145-5p	MYC	Functional MTI	MIRT004290	Immunoblot, Luciferase reporter assay, qRT-PCR	26354756
hsa-miR-145-5p	E2F3	Functional MTI	MIRT438350	ChIP-seq, Immunohistochemistry, Luciferase reporter assay, qRT-PCR, Western blot	25762621
hsa-miR-146a-5p	BRCA1	Functional MTI	MIRT001920	Luciferase reporter assay	18660546
hsa-miR-146a-5p	BRCA1	Functional MTI	MIRT001920	Microarray, qRT-PCR, Western blot	19944095
hsa-miR-146a-5p	BRCA1	Functional MTI	MIRT001920	ChIP-seq, Luciferase reporter assay	23671131
hsa-miR-146a-5p	CCND1	Functional MTI	MIRT734422	Luciferase reporter assay, qRT-PCR, Western blot	27494902
hsa-miR-150-3p	TP53	Functional MTI	MIRT735266	qRT-PCR, Western blot	27081855
hsa-miR-150-5p	VEGFA	Functional MTI	MIRT004272	ELISA, Luciferase reporter assay	18320040
hsa-miR-150-5p	TP53	Functional MTI	MIRT052652	Luciferase reporter assay, Western blot	23747308
hsa-miR-150-5p	TP53	Functional MTI	MIRT052652	Luciferase reporter assay, qRT-PCR	23670238
hsa-miR-151a-5p	TP53	Functional MTI	MIRT733165	ChIP-seq, Luciferase reporter assay, qRT-PCR, Western blot	27191259
hsa-miR-152-3p	CCND1	Functional MTI	MIRT438428	Luciferase reporter assay, Microarray, qRT-PCR, Western blot	23174883
hsa-miR-155-3p	TP53	Functional MTI	MIRT734972	ChIP-seq, Luciferase reporter assay, Western blot	27903673
hsa-miR-155-5p	TP53INP1	Functional MTI	MIRT003007	Western blot, Luciferase reporter assay, Reporter assay	17911264
hsa-miR-155-5p	TP53INP1	Functional MTI	MIRT003007	Microarray, qRT-PCR, Western blot	21093163
hsa-miR-155-5p	TP53INP1	Functional MTI	MIRT003007	Reporter assay;Other	20584899
hsa-miR-155-5p	TP53INP1	Functional MTI	MIRT003007	Immunohistochemistry, Luciferase reporter assay, Microarray, qRT-PCR, Western blot	23209550
hsa-miR-155-5p	TP53INP1	Functional MTI	MIRT003007	Luciferase reporter assay	24152184
hsa-miR-155-5p	TP53INP1	Functional MTI	MIRT003007	qRT-PCR, Western blot	23568502
hsa-miR-155-5p	TP53INP1	Functional MTI	MIRT003007	Western blot	25601564
hsa-miR-155-5p	CCND1	Functional MTI	MIRT020946	Luciferase reporter assay, Western blot	22858023
hsa-miR-155-5p	CCND1	Functional MTI	MIRT020946	Flow, Luciferase reporter assay, qRT-PCR, Western blot	26955820
hsa-miR-155-5p	WEE1	Functional MTI	MIRT020929	Reporter assay;Other	20584899
hsa-miR-155-5p	MYC	Functional MTI	MIRT054028	Luciferase reporter assay, qRT-PCR, Western blot	24969405
hsa-miR-155-5p	HIF1A	Functional MTI	MIRT398178	qRT-PCR, Immunohistochemistry, Western blot	25143000
hsa-miR-155-5p	CCND2	Functional MTI	MIRT734468	qRT-PCR, Western blot	26986233
hsa-miR-155-5p	PTEN	Functional MTI	MIRT734893	Luciferase reporter assay, qRT-PCR, Western blot	27811366
hsa-miR-155-5p	PTEN	Functional MTI	MIRT734893	Immunohistochemistry, Luciferase reporter assay, qRT-PCR, Western blot	28132399
hsa-miR-15a-5p	CCND2	Functional MTI	MIRT000285	Luciferase reporter assay	19549910
hsa-miR-15a-5p	BCL2	Functional MTI	MIRT000815	Luciferase reporter assay	17707831
hsa-miR-15a-5p	BCL2	Functional MTI	MIRT000815	Luciferase reporter assay	19478946
hsa-miR-15a-5p	BCL2	Functional MTI	MIRT000815	Western blot	20876285
hsa-miR-15a-5p	BCL2	Functional MTI	MIRT000815	Luciferase reporter assay, qRT-PCR, Western blot	16166262
hsa-miR-15a-5p	BCL2	Functional MTI	MIRT000815	Western blot	19903841
hsa-miR-15a-5p	BCL2	Functional MTI	MIRT000815	Western blot	26397135
hsa-miR-15a-5p	CCND1	Functional MTI	MIRT001227	qRT-PCR, Luciferase reporter assay, Western blot	19591824
hsa-miR-15a-5p	CCND1	Functional MTI	MIRT001227	Luciferase reporter assay	19549910
hsa-miR-15a-5p	CCND1	Functional MTI	MIRT001227	Luciferase reporter assay	18931683
hsa-miR-15a-5p	CCND1	Functional MTI	MIRT001227	Luciferase reporter assay, Western blot	26993269
hsa-miR-15a-5p	BRCA1	Functional MTI	MIRT003333	Luciferase reporter assay	19144710
hsa-miR-15a-5p	VEGFA	Functional MTI	MIRT004275	ELISA, Luciferase reporter assay	18320040
hsa-miR-15a-5p	VEGFA	Functional MTI	MIRT004275	Luciferase reporter assay, qRT-PCR, Western blot	23104180
hsa-miR-15a-5p	VEGFA	Functional MTI	MIRT004275	Luciferase reporter assay	23233752
hsa-miR-15a-5p	VEGFA	Functional MTI	MIRT004275	Chromatin immunoprecipitation, Immunoblot, Immunohistochemistry, Luciferase reporter assay, Microarray, qRT-PCR	27322147
hsa-miR-15a-5p	VEGFA	Functional MTI	MIRT004275	ELISA, Flow, Immunohistochemistry, Luciferase reporter assay, qRT-PCR, Western blot	27916780
hsa-miR-15a-5p	TP53	Functional MTI	MIRT005763	Immunoblot, Luciferase reporter assay	21205967
hsa-miR-15a-5p	HMGA2	Functional MTI	MIRT006805	Luciferase reporter assay, qRT-PCR, Western blot	22139073
hsa-miR-15a-5p	PURA	Functional MTI	MIRT006998	Luciferase reporter assay	22835829
hsa-miR-15a-5p	WEE1	Functional MTI	MIRT247095	Luciferase reporter assay, qRT-PCR, Western blot	25594541
hsa-miR-15b-5p	BCL2	Functional MTI	MIRT000978	Luciferase reporter assay, qRT-PCR, Western blot, Reporter assay, Reporter assay;Other	18449891
hsa-miR-15b-5p	BCL2	Functional MTI	MIRT000978	Luciferase reporter assay, qRT-PCR, Western blot	23907579
hsa-miR-15b-5p	BCL2	Functional MTI	MIRT000978	qRT-PCR, Western blot	26884837
hsa-miR-15b-5p	CCND1	Functional MTI	MIRT003913	Luciferase reporter assay, QRTPCR, Western blot	24995320
hsa-miR-15b-5p	VEGFA	Functional MTI	MIRT004274	ELISA, Luciferase reporter assay	18320040
hsa-miR-15b-5p	PURA	Functional MTI	MIRT007001	Luciferase reporter assay	22835829
hsa-miR-15b-5p	WEE1	Functional MTI	MIRT247097	Luciferase reporter assay, qRT-PCR, Western blot	25594541
hsa-miR-16-1-3p	CCND1	Functional MTI	MIRT000957	qRT-PCR, GFP reporter assay, Western blot	18483394
hsa-miR-16-5p	PURA	Functional MTI	MIRT001425	Luciferase reporter assay	22835829
hsa-miR-16-5p	CCND1	Functional MTI	MIRT001225	Western blot, Luciferase reporter assay	18483394
hsa-miR-16-5p	CCND1	Functional MTI	MIRT001225	qRT-PCR, Luciferase reporter assay, Western blot	19591824
hsa-miR-16-5p	CCND1	Functional MTI	MIRT001225	qRT-PCR, flow, Western blot, Luciferase reporter assay	18701644
hsa-miR-16-5p	CCND1	Functional MTI	MIRT001225	Luciferase reporter assay	18931683
hsa-miR-16-5p	CCND1	Functional MTI	MIRT001225	Luciferase reporter assay	19549910
hsa-miR-16-5p	CCND1	Functional MTI	MIRT001225	Western blot	24148817
hsa-miR-16-5p	BCL2	Functional MTI	MIRT001800	Luciferase reporter assay	17877811
hsa-miR-16-5p	BCL2	Functional MTI	MIRT001800	Luciferase reporter assay, qRT-PCR, Western blot, Reporter assay	18449891
hsa-miR-16-5p	BCL2	Functional MTI	MIRT001800	Luciferase reporter assay	17351108
hsa-miR-16-5p	BCL2	Functional MTI	MIRT001800	Luciferase reporter assay	17707831
hsa-miR-16-5p	BCL2	Functional MTI	MIRT001800	Immunohistochemistry, Microarray, Western blot	20643754
hsa-miR-16-5p	BCL2	Functional MTI	MIRT001800	Western blot	20876285
hsa-miR-16-5p	BCL2	Functional MTI	MIRT001800	Luciferase reporter assay, Western blot	19269153
hsa-miR-16-5p	BCL2	Functional MTI	MIRT001800	Luciferase reporter assay, qRT-PCR, Western blot	16166262
hsa-miR-16-5p	BCL2	Functional MTI	MIRT001800	Western blot	19903841
hsa-miR-16-5p	BCL2	Functional MTI	MIRT001800	Luciferase reporter assay, qRT-PCR, Western blot	23907579
hsa-miR-16-5p	BCL2	Functional MTI	MIRT001800	Western blot	24148817
hsa-miR-16-5p	BCL2	Functional MTI	MIRT001800	Immunoprecipitaion, qRT-PCR, Immunoblot, Western blot	25435430
hsa-miR-16-5p	BCL2	Functional MTI	MIRT001800	Western blot	26397135
hsa-miR-16-5p	BCL2	Functional MTI	MIRT001800	Microarray, qRT-PCR, Western blot	26722459
hsa-miR-16-5p	BRCA1	Functional MTI	MIRT003328	Luciferase reporter assay	19144710
hsa-miR-16-5p	CCND2	Functional MTI	MIRT003431	qRT-PCR, Western blot	26393798
hsa-miR-16-5p	VEGFA	Functional MTI	MIRT003890	ELISA, Luciferase reporter assay	18320040
hsa-miR-16-5p	VEGFA	Functional MTI	MIRT003890	Luciferase reporter assay, Western blot	19144909
hsa-miR-16-5p	VEGFA	Functional MTI	MIRT003890	Luciferase reporter assay, qRT-PCR, Western blot	21885851
hsa-miR-16-5p	VEGFA	Functional MTI	MIRT003890	Luciferase reporter assay	23083510
hsa-miR-16-5p	VEGFA	Functional MTI	MIRT003890	Luciferase reporter assay, qRT-PCR, Western blot	23104180
hsa-miR-16-5p	VEGFA	Functional MTI	MIRT003890	Luciferase reporter assay	23233752
hsa-miR-16-5p	TP53	Functional MTI	MIRT005764	Immunoblot, Luciferase reporter assay	21205967
hsa-miR-16-5p	HMGA2	Functional MTI	MIRT006804	Luciferase reporter assay, qRT-PCR, Western blot	22139073
hsa-miR-16-5p	WEE1	Functional MTI	MIRT031934	Luciferase reporter assay, Western blot	24336073
hsa-miR-16-5p	WEE1	Functional MTI	MIRT031934	Luciferase reporter assay, qRT-PCR, Western blot	25594541
hsa-miR-17-5p	PTEN	Functional MTI	MIRT000499	Luciferase reporter assay, Western blot	20227518
hsa-miR-17-5p	PTEN	Functional MTI	MIRT000499	Luciferase reporter assay	21283765
hsa-miR-17-5p	PTEN	Functional MTI	MIRT000499	Luciferase reporter assay	20388916
hsa-miR-17-5p	PTEN	Functional MTI	MIRT000499	Luciferase reporter assay	23418359
hsa-miR-17-5p	PTEN	Functional MTI	MIRT000499	Luciferase reporter assay	24220575
hsa-miR-17-5p	PTEN	Functional MTI	MIRT000499	Luciferase reporter assay, Western blot, qRT-PCR	24912422
hsa-miR-17-5p	PTEN	Functional MTI	MIRT000499	Luciferase reporter assay, qRT-PCR, Western blot	24462867
hsa-miR-17-5p	PTEN	Functional MTI	MIRT000499	Western blot, Luciferase reporter assay	23391506
hsa-miR-17-5p	CDKN1A	Functional MTI	MIRT000600	qRT-PCR, Luciferase reporter assay, Western blot, Reporter assay	18212054
hsa-miR-17-5p	CDKN1A	Functional MTI	MIRT000600	qRT-PCR, Western blot, Northern blot, Luciferase reporter assay	18493594
hsa-miR-17-5p	CDKN1A	Functional MTI	MIRT000600	qRT-PCR, Luciferase reporter assay, Western blot	20190813
hsa-miR-17-5p	CDKN1A	Functional MTI	MIRT000600	Luciferase reporter assay, qRT-PCR;Other	18941111
hsa-miR-17-5p	CDKN1A	Functional MTI	MIRT000600	Luciferase reporter assay, Western blot	20227518
hsa-miR-17-5p	CDKN1A	Functional MTI	MIRT000600	Luciferase reporter assay	21283765
hsa-miR-17-5p	CDKN1A	Functional MTI	MIRT000600	Luciferase reporter assay, qRT-PCR, Western blot	23333058
hsa-miR-17-5p	CDKN1A	Functional MTI	MIRT000600	Luciferase reporter assay, qRT-PCR, Western blot	24989082
hsa-miR-17-5p	CDKN1A	Functional MTI	MIRT000600	Luciferase reporter assay, qRT-PCR, Western blot	27774777
hsa-miR-17-5p	CDKN1A	Functional MTI	MIRT000600	Luciferase reporter assay, qRT-PCR, Western blot	26482648
hsa-miR-17-5p	BCL2L11	Functional MTI	MIRT001206	Luciferase reporter assay, Western blot	19136465
hsa-miR-17-5p	BCL2L11	Functional MTI	MIRT001206	qRT-PCR, Western blot, Northern blot, Luciferase reporter assay	18493594
hsa-miR-17-5p	BCL2L11	Functional MTI	MIRT001206	Luciferase reporter assay, Western blot	20227518
hsa-miR-17-5p	BCL2	Functional MTI	MIRT003014	Luciferase reporter assay	19666108
hsa-miR-17-5p	BCL2	Functional MTI	MIRT003014	Luciferase reporter assay, qRT-PCR, Western blot	24280866
hsa-miR-17-5p	VEGFA	Functional MTI	MIRT004271	ELISA, Luciferase reporter assay	18320040
hsa-miR-17-5p	HIF1A	Functional MTI	MIRT004588	Luciferase reporter assay, Microarray, qRT-PCR, Western blot	24252850
hsa-miR-17-5p	HIF1A	Functional MTI	MIRT004588	Luciferase reporter assay, qRT-PCR, Western blot	23911400
hsa-miR-17-5p	CCND1	Functional MTI	MIRT005287	Luciferase reporter assay, qRT-PCR, Western blot	18695042
hsa-miR-17-5p	CCND1	Functional MTI	MIRT005287	Luciferase reporter assay	21283765
hsa-miR-17-5p	MYC	Functional MTI	MIRT005288	Western blot	18695042
hsa-miR-17-5p	CCND2	Functional MTI	MIRT005848	Luciferase reporter assay	21283765
hsa-miR-17-5p	RB1	Functional MTI	MIRT005850	Luciferase reporter assay	21283765
hsa-miR-17-5p	WEE1	Functional MTI	MIRT005853	Luciferase reporter assay	21283765
hsa-miR-17-5p	TP53INP1	Functional MTI	MIRT053060	qRT-PCR, Western blot, Reporter assay	22730212
hsa-miR-17-5p	TP53INP1	Functional MTI	MIRT053060	Luciferase reporter assay, qRT-PCR, Western blot	23333058
hsa-miR-17-5p	STAT3	Functional MTI	MIRT054903	Immunoblot, Luciferase reporter assay	25594054
hsa-miR-17-5p	STAT3	Functional MTI	MIRT054903	Luciferase reporter assay, Microarray, Northern blot, qRT-PCR, Western blot	23059786
hsa-miR-181a-5p	XIAP	Functional MTI	MIRT006950	Luciferase reporter assay	22610076
hsa-miR-181a-5p	CDKN1A	Functional MTI	MIRT733054	qRT-PCR, Western blot	27534652
hsa-miR-181b-5p	CYLD	Functional MTI	MIRT005595	Luciferase reporter assay, qRT-PCR	20797623
hsa-miR-181b-5p	CYLD	Functional MTI	MIRT005595	Luciferase reporter assay, qRT-PCR, Western blot	27189061
hsa-miR-181b-5p	XIAP	Functional MTI	MIRT006951	Luciferase reporter assay	22610076
hsa-miR-182-5p	CYLD	Functional MTI	MIRT006978	Luciferase reporter assay, qRT-PCR, Western blot	23006329
hsa-miR-184	MYC	Functional MTI	MIRT438154	Luciferase reporter assay	24157866
hsa-miR-185-5p	MYC	Functional MTI	MIRT733170	qRT-PCR, Western blot	27250838
hsa-miR-186-5p	XIAP	Functional MTI	MIRT734449	Luciferase reporter assay, qRT-PCR, Western blot	26231038
hsa-miR-192-5p	BCL2	Functional MTI	MIRT004844	Luciferase reporter assay, qRT-PCR, Reporter assay;Microarray;Other	19074876
hsa-miR-192-5p	BCL2	Functional MTI	MIRT004844	qRT-PCR, Western blot	26550150
hsa-miR-192-5p	RB1	Functional MTI	MIRT006435	Immunoblot, Luciferase reporter assay, qRT-PCR, Western blot	21511813
hsa-miR-192-5p	RB1	Functional MTI	MIRT006435	Luciferase reporter assay, qRT-PCR, Western blot	24012720
hsa-miR-192-5p	XIAP	Functional MTI	MIRT026131	qRT-PCR, Luciferase reporter assay, Immunohistochemistry, Western blot	25444916
hsa-miR-193a-3p	CCND1	Functional MTI	MIRT246929	Luciferase reporter assay, Microarray, qRT-PCR, Western blot	27307030
hsa-miR-193b-3p	CCND1	Functional MTI	MIRT000480	qRT-PCR, Luciferase reporter assay, Western blot, Microarray, Reporter assay;Western blot;qRT-PCR;Microarray;Other	20304954
hsa-miR-193b-3p	CCND1	Functional MTI	MIRT000480	Luciferase reporter assay, qRT-PCR, Western blot	20655737
hsa-miR-193b-3p	CCND1	Functional MTI	MIRT000480	Western blot, qRT-PCR	27071318
hsa-miR-193b-3p	CCND1	Functional MTI	MIRT000480	Immunohistochemistry, Luciferase reporter assay, Microarray, qRT-PCR, Western blot	26129688
hsa-miR-193b-3p	CCND1	Functional MTI	MIRT000480	Luciferase reporter assay, Western blot	27918099
hsa-miR-195-5p	E2F3	Functional MTI	MIRT000223	Immunohistochemistry, Luciferase reporter assay, Northern blot, qRT-PCR, Western blot, Reporter assay;Western blot;qRT-PCR;Other	19441017
hsa-miR-195-5p	E2F3	Functional MTI	MIRT000223	Luciferase reporter assay, Western blot	22217655
hsa-miR-195-5p	CCND1	Functional MTI	MIRT000225	Luciferase reporter assay, Western blot	22217655
hsa-miR-195-5p	CCND1	Functional MTI	MIRT000225	Luciferase reporter assay	23383003
hsa-miR-195-5p	CCND1	Functional MTI	MIRT000225	Immunohistochemistry, Luciferase reporter assay, qRT-PCR, Western blot	23451060
hsa-miR-195-5p	CCND1	Functional MTI	MIRT000225	Luciferase reporter assay, qRT-PCR, Western blot	24402230
hsa-miR-195-5p	CCND1	Functional MTI	MIRT000225	Immunohistochemistry, Luciferase reporter assay, Microarray, qRT-PCR, Western blot	25823925
hsa-miR-196a-5p	CDKN1A	Functional MTI	MIRT734938	Immunoblot, Luciferase reporter assay	27880728
hsa-miR-19a-3p	PTEN	Functional MTI	MIRT002958	Luciferase reporter assay, Reporter assay	14697198
hsa-miR-19a-3p	PTEN	Functional MTI	MIRT002958	Luciferase reporter assay, qRT-PCR, Western blot	21853360
hsa-miR-19a-3p	PTEN	Functional MTI	MIRT002958	Luciferase reporter assay	20388916
hsa-miR-19a-3p	PTEN	Functional MTI	MIRT002958	qRT-PCR, Western blot	23603256
hsa-miR-19a-3p	PTEN	Functional MTI	MIRT002958	Luciferase reporter assay	24220575
hsa-miR-19a-3p	PTEN	Functional MTI	MIRT002958	In situ hybridization, Luciferase reporter assay, qRT-PCR, Western blot	23824915
hsa-miR-19a-3p	PTEN	Functional MTI	MIRT002958	Luciferase reporter assay	26098000
hsa-miR-19a-3p	PTEN	Functional MTI	MIRT002958	qRT-PCR, Western blot	18460397
hsa-miR-19a-3p	CCND1	Functional MTI	MIRT003426	flow, Luciferase reporter assay, Microarray, qRT-PCR, Western blot	20133739
hsa-miR-19a-3p	BCL2L11	Functional MTI	MIRT004452	Luciferase reporter assay	18728182
hsa-miR-19a-3p	MYCN	Functional MTI	MIRT031308	Reporter assay	14697198
hsa-miR-19a-3p	TP53INP1	Functional MTI	MIRT726244	Luciferase reporter assay, qRT-PCR, Western blot	26367773
hsa-miR-19b-1-5p	CCND1	Functional MTI	MIRT006276	Western blot	22197821
hsa-miR-19b-3p	MYCN	Functional MTI	MIRT031210	Reporter assay	21654684
hsa-miR-19b-3p	TP53	Functional MTI	MIRT438624	Immunoblot, Immunohistochemistry, Luciferase reporter assay, qRT-PCR	24742936
hsa-miR-200a-3p	TP53	Functional MTI	MIRT053604	Luciferase reporter assay, Western blot	23144891
hsa-miR-200b-3p	E2F3	Functional MTI	MIRT006298	Flow, Luciferase reporter assay, Western blot	22139708
hsa-miR-200b-3p	E2F3	Functional MTI	MIRT006298	Flow, Luciferase reporter assay, Western blot	22144583
hsa-miR-200b-3p	XIAP	Functional MTI	MIRT006671	Luciferase reporter assay, qRT-PCR, Western blot	21993663
hsa-miR-200c-3p	XIAP	Functional MTI	MIRT006672	Luciferase reporter assay, qRT-PCR, Western blot	21993663
hsa-miR-200c-3p	XIAP	Functional MTI	MIRT006672	Immunoblot, Luciferase reporter assay, qRT-PCR	25985365
hsa-miR-200c-3p	E2F3	Functional MTI	MIRT438548	Luciferase reporter assay, Western blot	25017995
hsa-miR-200c-5p	E2F3	Functional MTI	MIRT734271	Luciferase reporter assay, qRT-PCR, Western blot	28413473
hsa-miR-200c-5p	E2F3	Functional MTI	MIRT734271	Luciferase reporter assay, qRT-PCR, Western blot	25367080
hsa-miR-202-3p	MYCN	Functional MTI	MIRT016613	Reporter assay	21654684
hsa-miR-203a-3p	E2F3	Functional MTI	MIRT006268	Luciferase reporter assay	22354972
hsa-miR-203a-5p	CDKN1A	Functional MTI	MIRT734400	Western blot	26278219
hsa-miR-206	CCND1	Functional MTI	MIRT438439	Luciferase reporter assay, Western blot	25111862
hsa-miR-206	CCND1	Functional MTI	MIRT438439	Luciferase reporter assay	24107628
hsa-miR-208a-3p	CDKN1A	Functional MTI	MIRT000599	qRT-PCR, Luciferase reporter assay, Western blot	20190813
hsa-miR-208a-3p	CDKN1A	Functional MTI	MIRT000599	Luciferase reporter assay, Western blot	26754670
hsa-miR-208b-3p	CDKN1A	Functional MTI	MIRT000598	qRT-PCR, Luciferase reporter assay, Western blot	20190813
hsa-miR-208b-3p	CDKN1A	Functional MTI	MIRT000598	Luciferase reporter assay, Microarray, qRT-PCR, Western blot	26044724
hsa-miR-20a-5p	CCND1	Functional MTI	MIRT000179	Luciferase reporter assay, qRT-PCR, Western blot	18695042
hsa-miR-20a-5p	CCND1	Functional MTI	MIRT000179	Luciferase reporter assay	21283765
hsa-miR-20a-5p	CCND1	Functional MTI	MIRT000179	qRT-PCR, Western blot	23836497
hsa-miR-20a-5p	CDKN1A	Functional MTI	MIRT000597	qRT-PCR, Luciferase reporter assay, Western blot	20190813
hsa-miR-20a-5p	CDKN1A	Functional MTI	MIRT000597	Luciferase reporter assay, qRT-PCR;Other	18941111
hsa-miR-20a-5p	CDKN1A	Functional MTI	MIRT000597	Luciferase reporter assay	21283765
hsa-miR-20a-5p	CDKN1A	Functional MTI	MIRT000597	Luciferase reporter assay, qRT-PCR, Western blot	23333058
hsa-miR-20a-5p	BCL2	Functional MTI	MIRT003011	Luciferase reporter assay	19666108
hsa-miR-20a-5p	PTEN	Functional MTI	MIRT003369	Luciferase reporter assay	21283765
hsa-miR-20a-5p	VEGFA	Functional MTI	MIRT004450	ELISA, Luciferase reporter assay	18320040
hsa-miR-20a-5p	BCL2L11	Functional MTI	MIRT004570	Luciferase reporter assay, Western blot	27888798
hsa-miR-20a-5p	MYC	Functional MTI	MIRT005289	Western blot	18695042
hsa-miR-20a-5p	WEE1	Functional MTI	MIRT005860	Luciferase reporter assay	21283765
hsa-miR-20a-5p	CCND2	Functional MTI	MIRT005854	Luciferase reporter assay	21283765
hsa-miR-20a-5p	RB1	Functional MTI	MIRT005857	Luciferase reporter assay	21283765
hsa-miR-20a-5p	PURA	Functional MTI	MIRT007002	Luciferase reporter assay	22835829
hsa-miR-20a-5p	STAT3	Functional MTI	MIRT050559	qRT-PCR, Western blot	23836497
hsa-miR-20a-5p	STAT3	Functional MTI	MIRT050559	Luciferase reporter assay, Microarray, Northern blot, qRT-PCR, Western blot	23059786
hsa-miR-20a-5p	TP53INP1	Functional MTI	MIRT053505	Luciferase reporter assay, qRT-PCR, Western blot	23333058
hsa-miR-20a-5p	HIF1A	Functional MTI	MIRT000002	Luciferase reporter assay, Western blot, Northern blot, qRT-PCR	18632605
hsa-miR-20a-5p	HIF1A	Functional MTI	MIRT000002	Luciferase reporter assay, qRT-PCR, Western blot	23911400
hsa-miR-20b-5p	CDKN1A	Functional MTI	MIRT000596	qRT-PCR, Luciferase reporter assay, Western blot, Reporter assay;Other	18212054
hsa-miR-20b-5p	CDKN1A	Functional MTI	MIRT000596	qRT-PCR, Luciferase reporter assay, Western blot	20190813
hsa-miR-20b-5p	STAT3	Functional MTI	MIRT000497	qRT-PCR, ELISA, ChIP, Western blot	20232316
hsa-miR-20b-5p	HIF1A	Functional MTI	MIRT000498	qRT-PCR, ELISA, ChIP, Western blot	20232316
hsa-miR-20b-5p	HIF1A	Functional MTI	MIRT000498	Luciferase reporter assay, qRT-PCR, Western blot	26612965
hsa-miR-20b-5p	VEGFA	Functional MTI	MIRT004451	ELISA, Luciferase reporter assay	18320040
hsa-miR-20b-5p	VEGFA	Functional MTI	MIRT004451	Luciferase reporter assay, qRT-PCR, Western blot	26612965
hsa-miR-20b-5p	PTEN	Functional MTI	MIRT054862	Luciferase reporter assay	25364498
hsa-miR-20b-5p	PTEN	Functional MTI	MIRT054862	Luciferase reporter assay, qRT-PCR	23945289
hsa-miR-20b-5p	BRCA1	Functional MTI	MIRT438069	Luciferase reporter assay, qRT-PCR	23945289
hsa-miR-210-3p	E2F3	Functional MTI	MIRT003184	Luciferase reporter assay, Western blot	18059191
hsa-miR-210-3p	E2F3	Functional MTI	MIRT003184	Luciferase reporter assay	21465485
hsa-miR-210-3p	E2F3	Functional MTI	MIRT003184	Luciferase reporter assay, Microarray, qRT-PCR, Western blot	23028679
hsa-miR-211-5p	CCND1	Functional MTI	MIRT734607	Luciferase reporter assay, Western blot	25889927
hsa-miR-212-3p	RB1	Functional MTI	MIRT006504	Luciferase reporter assay, Western blot, Reporter assay;Western blot;qRT-PCR	21329664
hsa-miR-212-3p	MYC	Functional MTI	MIRT053469	Luciferase reporter assay, qRT-PCR, Western blot	21053104
hsa-miR-214-3p	TP53	Functional MTI	MIRT006881	Luciferase reporter assay	22927443
hsa-miR-214-3p	TP53	Functional MTI	MIRT006881	Reporter assay	21217645
hsa-miR-214-5p	TP53	Functional MTI	MIRT735318	qRT-PCR, Western blot	25962755
hsa-miR-215-5p	XIAP	Functional MTI	MIRT024546	qRT-PCR, Luciferase reporter assay, Immunohistochemistry, Western blot	25444916
hsa-miR-215-5p	RB1	Functional MTI	MIRT024341	Immunofluorescence, Luciferase reporter assay, Microarray, qRT-PCR, Western blot	23981575
hsa-miR-217	E2F3	Functional MTI	MIRT053154	Immunohistochemistry, Luciferase reporter assay, Western blot	24671492
hsa-miR-22-3p	CDKN1A	Functional MTI	MIRT053319	Luciferase reporter assay, qRT-PCR, Western blot	23582783
hsa-miR-221-3p	RB1	Functional MTI	MIRT054352	Luciferase reporter assay, QRTPCR, Western blot	23630541
hsa-miR-23a-3p	XIAP	Functional MTI	MIRT731656	Microarray, qRT-PCR, Western blot	26439986
hsa-miR-24-3p	MYC	Functional MTI	MIRT000121	Luciferase reporter assay, Microarray, qRT-PCR, Western blot, Reporter assay;qRT-PCR;Microarray;Other	19748357
hsa-miR-24-3p	MYC	Functional MTI	MIRT000121	Immunohistochemistry, In situ hybridization, Luciferase reporter assay, qRT-PCR, Western blot	26159387
hsa-miR-24-3p	BRCA1	Functional MTI	MIRT004836	Luciferase reporter assay, Microarray, qRT-PCR, Western blot	19748357
hsa-miR-24-3p	BRCA1	Functional MTI	MIRT004836	Reporter assay;Western blot;qRT-PCR	20018894
hsa-miR-24-3p	XIAP	Functional MTI	MIRT053061	qRT-PCR, Western blot, Reporter assay	22733138
hsa-miR-24-3p	CCND1	Functional MTI	MIRT438427	Luciferase reporter assay, Microarray, qRT-PCR, Western blot	23174883
hsa-miR-24-3p	TP53	Functional MTI	MIRT734677	Immunohistochemistry, Luciferase reporter assay, qRT-PCR, Western blot	27780140
hsa-miR-25-3p	TP53	Functional MTI	MIRT005417	Luciferase reporter assay, qRT-PCR, Western blot	20935678
hsa-miR-25-5p	MYC	Functional MTI	MIRT733156	qRT-PCR, Western blot	27120728
hsa-miR-26a-1-3p	E2F3	Functional MTI	MIRT733183	qRT-PCR, Western blot	27517917
hsa-miR-26a-5p	RB1	Functional MTI	MIRT003213	GFP reporter assay, Luciferase reporter assay, Western blot	20080666
hsa-miR-26a-5p	RB1	Functional MTI	MIRT003213	Luciferase reporter assay, Microarray, qRT-PCR, Western blot	23108995
hsa-miR-26b-5p	RB1	Functional MTI	MIRT437472	Luciferase reporter assay, qRT-PCR, Western blot	24027266
hsa-miR-27a-3p	TP53	Functional MTI	MIRT028744	Luciferase reporter assay	26687066
hsa-miR-27a-3p	CCND1	Functional MTI	MIRT053476	Luciferase reporter assay, qRT-PCR, Western blot	21569481
hsa-miR-28-3p	TP53	Functional MTI	MIRT734605	Luciferase reporter assay	24681953
hsa-miR-28-5p	CDKN1A	Functional MTI	MIRT000595	qRT-PCR, Luciferase reporter assay, Western blot	20190813
hsa-miR-28-5p	TP53	Functional MTI	MIRT733332	Luciferase reporter assay	24681953
hsa-miR-2861	CCND1	Functional MTI	MIRT731612	Luciferase reporter assay, Western blot	27364926
hsa-miR-298	CDKN1A	Functional MTI	MIRT000594	qRT-PCR, Luciferase reporter assay, Western blot	20190813
hsa-miR-299-5p	CDKN1A	Functional MTI	MIRT000593	qRT-PCR, Luciferase reporter assay, Western blot	20190813
hsa-miR-299-5p	CDKN1A	Functional MTI	MIRT000593	Luciferase reporter assay, Western blot	27347210
hsa-miR-29a-3p	MYCN	Functional MTI	MIRT006135	Luciferase reporter assay, qRT-PCR	21835775
hsa-miR-29a-3p	MYCN	Functional MTI	MIRT006135	Reporter assay	21654684
hsa-miR-29a-3p	CCND1	Functional MTI	MIRT438346	qRT-PCR, Western blot	25889078
hsa-miR-29a-3p	MYC	Functional MTI	MIRT733427	Luciferase reporter assay, qRT-PCR, Western blot	26771839
hsa-miR-29b-3p	MYCN	Functional MTI	MIRT027239	Reporter assay	21654684
hsa-miR-29b-3p	MYC	Functional MTI	MIRT735343	Immunoblot, Luciferase reporter assay	26180082
hsa-miR-29c-3p	MYCN	Functional MTI	MIRT020415	Reporter assay	21654684
hsa-miR-300	TP53	Functional MTI	MIRT731757	Immunoprecipitaion, Luciferase reporter assay, qRT-PCR, Western blot	26221215
hsa-miR-300	TP53	Functional MTI	MIRT731757	Luciferase reporter assay, qRT-PCR, Western blot	27779716
hsa-miR-300	TP53	Functional MTI	MIRT731757	Luciferase reporter assay, Western blot	26221232
hsa-miR-302a-3p	CCND1	Functional MTI	MIRT003637	Luciferase reporter assay, qRT-PCR, Western blot	18710938
hsa-miR-302a-3p	CCND1	Functional MTI	MIRT003637	Luciferase reporter assay, Microarray, Northern blot, Western blot	21062975
hsa-miR-302a-3p	CDKN1A	Functional MTI	MIRT004660	Luciferase reporter assay	20101223
hsa-miR-302c-3p	CCND1	Functional MTI	MIRT005671	Luciferase reporter assay, Microarray, Northern blot, Western blot	21062975
hsa-miR-30a-5p	TP53	Functional MTI	MIRT437492	Luciferase reporter assay, qRT-PCR, Western blot	24029422
hsa-miR-30b-5p	TP53	Functional MTI	MIRT437493	Luciferase reporter assay, qRT-PCR, Western blot	24029422
hsa-miR-30c-5p	TP53	Functional MTI	MIRT437494	Luciferase reporter assay, qRT-PCR, Western blot	24029422
hsa-miR-30c-5p	TP53	Functional MTI	MIRT437494	Flow, GFP reporter assay, Immunoblot, Next Generation Sequencing (NGS), Northern blot, qRT-PCR, Western blot	28330939
hsa-miR-30d-5p	TP53	Functional MTI	MIRT005418	Luciferase reporter assay, qRT-PCR, Western blot	20935678
hsa-miR-30d-5p	TP53	Functional MTI	MIRT005418	Luciferase reporter assay, qRT-PCR, Western blot	24029422
hsa-miR-30e-5p	TP53	Functional MTI	MIRT437495	Luciferase reporter assay, qRT-PCR, Western blot	24029422
hsa-miR-32-5p	BCL2L11	Functional MTI	MIRT003739	qRT-PCR, Western blot	21816906
hsa-miR-32-5p	BCL2L11	Functional MTI	MIRT003739	Luciferase reporter assay, qRT-PCR	18676839
hsa-miR-32-5p	PTEN	Functional MTI	MIRT054348	Luciferase reporter assay, QRTPCR, Western blot	23617834
hsa-miR-32-5p	PTEN	Functional MTI	MIRT054348	qRT-PCR, Western blot	23524257
hsa-miR-32-5p	PTEN	Functional MTI	MIRT054348	Luciferase reporter assay, Western blot	28319142
hsa-miR-320a	MYC	Functional MTI	MIRT044759	Luciferase reporter assay, qRT-PCR, Western blot	28243124
hsa-miR-320b	MYC	Functional MTI	MIRT036232	Luciferase reporter assay, qRT-PCR, Western blot	26487644
hsa-miR-335-5p	RB1	Functional MTI	MIRT003587	Luciferase reporter assay, Western blot	20713524
hsa-miR-335-5p	RB1	Functional MTI	MIRT003587	qRT-PCR, Western blot	22886530
hsa-miR-335-5p	MYC	Functional MTI	MIRT017925	Western blot	21618216
hsa-miR-335-5p	BRCA1	Functional MTI	MIRT018119	Western blot	21618216
hsa-miR-338-3p	CCND1	Functional MTI	MIRT006822	Luciferase reporter assay	22942717
hsa-miR-338-3p	CCND1	Functional MTI	MIRT006822	Luciferase reporter assay	22912826
hsa-miR-33a-5p	MYC	Functional MTI	MIRT054238	Immunoflourescence, Luciferase reporter assay, qRT-PCR, Western blot	23527086
hsa-miR-33b-5p	MYC	Functional MTI	MIRT006820	Immunohistochemistry, qRT-PCR, Western blot	26729612
hsa-miR-33b-5p	XIAP	Functional MTI	MIRT124989	Luciferase reporter assay, qRT-PCR, Western blot	27456358
hsa-miR-340-5p	CCND1	Functional MTI	MIRT060555	Luciferase reporter assay, qRT-PCR, Western blot	25817794
hsa-miR-345-5p	CDKN1A	Functional MTI	MIRT000592	qRT-PCR, Luciferase reporter assay, Western blot	20190813
hsa-miR-34a-3p	XIAP	Functional MTI	MIRT006260	Luciferase reporter assay	22161761
hsa-miR-34a-3p	CCND1	Functional MTI	MIRT733071	Western blot	27364974
hsa-miR-34a-3p	MYC	Functional MTI	MIRT733768	Luciferase reporter assay	26335888
hsa-miR-34a-5p	MYC	Functional MTI	MIRT000695	Luciferase reporter assay, Western blot, Reporter assay;Western blot;qRT-PCR;Microarray;Other	19696787
hsa-miR-34a-5p	MYC	Functional MTI	MIRT000695	Luciferase reporter assay, qRT-PCR, Western blot	21294122
hsa-miR-34a-5p	MYC	Functional MTI	MIRT000695	qRT-PCR, Western blot	21297663
hsa-miR-34a-5p	MYC	Functional MTI	MIRT000695	Luciferase reporter assay	22159222
hsa-miR-34a-5p	MYC	Functional MTI	MIRT000695	qRT-PCR, Western blot	25572695
hsa-miR-34a-5p	MYCN	Functional MTI	MIRT000980	Luciferase reporter assay, Western blot	18504438
hsa-miR-34a-5p	MYCN	Functional MTI	MIRT000980	qRT-PCR, Western blot, Luciferase reporter assay	18505919
hsa-miR-34a-5p	MYCN	Functional MTI	MIRT000980	Luciferase reporter assay	19461653
hsa-miR-34a-5p	MYCN	Functional MTI	MIRT000980	Luciferase reporter assay, Western blot	22020437
hsa-miR-34a-5p	MYCN	Functional MTI	MIRT000980	Immunohistochemistry, Luciferase reporter assay, qRT-PCR, Western blot	22662276
hsa-miR-34a-5p	MYCN	Functional MTI	MIRT000980	Western blot	25348795
hsa-miR-34a-5p	MYCN	Functional MTI	MIRT000980	Luciferase reporter assay	27764804
hsa-miR-34a-5p	MYCN	Functional MTI	MIRT000980	Luciferase reporter assay, qRT-PCR, Western blot	27836543
hsa-miR-34a-5p	CCND1	Functional MTI	MIRT001013	qRT-PCR, Luciferase reporter assay, Western blot, Reporter assay	18406353
hsa-miR-34a-5p	CCND1	Functional MTI	MIRT001013	Luciferase reporter assay	19461653
hsa-miR-34a-5p	CCND1	Functional MTI	MIRT001013	qRT-PCR, Western blot	20309880
hsa-miR-34a-5p	CCND1	Functional MTI	MIRT001013	Luciferase reporter assay, qRT-PCR, Western blot	27220728
hsa-miR-34a-5p	E2F3	Functional MTI	MIRT001756	Luciferase reporter assay, Western blot	17252019
hsa-miR-34a-5p	E2F3	Functional MTI	MIRT001756	Luciferase reporter assay	19461653
hsa-miR-34a-5p	E2F3	Functional MTI	MIRT001756	Luciferase reporter assay, Western blot, Microarray	17914404
hsa-miR-34a-5p	E2F3	Functional MTI	MIRT001756	Luciferase reporter assay, Western blot, Western blot;Other	17297439
hsa-miR-34a-5p	E2F3	Functional MTI	MIRT001756	Immunoprecipitaion, Luciferase reporter assay, qRT-PCR	20889924
hsa-miR-34a-5p	E2F3	Functional MTI	MIRT001756	Luciferase reporter assay, qRT-PCR, Western blot	23954321
hsa-miR-34a-5p	E2F3	Functional MTI	MIRT001756	Luciferase reporter assay, qRT-PCR, Western blot	28389657
hsa-miR-34a-5p	E2F3	Functional MTI	MIRT001756	Luciferase reporter assay, qRT-PCR, Western blot	25675046
hsa-miR-34a-5p	TP53	Functional MTI	MIRT007112	Flow, QRTPCR, Western blot	26406332
hsa-miR-34a-5p	TP53	Functional MTI	MIRT007112	Immunoblot, Luciferase reporter assay, Microarray, Northern blot, qRT-PCR	26177460
hsa-miR-34b-3p	MYC	Functional MTI	MIRT005319	Luciferase reporter assay, Western blot	18768788
hsa-miR-34b-3p	MYC	Functional MTI	MIRT005319	Immunoprecipitaion, Luciferase reporter assay, Microarray, qRT-PCR, Western blot	22585994
hsa-miR-34b-3p	MYCN	Functional MTI	MIRT006224	Luciferase reporter assay, Western blot	22020437
hsa-miR-34b-3p	CCND1	Functional MTI	MIRT006290	Luciferase reporter assay, qRT-PCR, Western blot	22113133
hsa-miR-34b-5p	MYC	Functional MTI	MIRT004401	Luciferase reporter assay	19461653
hsa-miR-34b-5p	MYCN	Functional MTI	MIRT733042	Luciferase reporter assay	27764804
hsa-miR-34c-5p	E2F3	Functional MTI	MIRT000760	Luciferase reporter assay	19461653
hsa-miR-34c-5p	E2F3	Functional MTI	MIRT000760	Luciferase reporter assay, Western blot	18768788
hsa-miR-34c-5p	E2F3	Functional MTI	MIRT000760	Immunocytochemistry, Immunofluorescence, Luciferase reporter assay, qRT-PCR, Western blot	23983607
hsa-miR-34c-5p	E2F3	Functional MTI	MIRT000760	Western blot	25846116
hsa-miR-34c-5p	MYC	Functional MTI	MIRT004402	Luciferase reporter assay	19461653
hsa-miR-34c-5p	MYC	Functional MTI	MIRT004402	Immunoprecipitaion, Luciferase reporter assay, Microarray, qRT-PCR, Western blot	22585994
hsa-miR-34c-5p	MYCN	Functional MTI	MIRT006225	Luciferase reporter assay, Western blot	22020437
hsa-miR-34c-5p	CCND1	Functional MTI	MIRT734031	Next Generation Sequencing (NGS), qRT-PCR, Western blot	26795575
hsa-miR-362-5p	CYLD	Functional MTI	MIRT053602	Flow, Luciferase reporter assay, qRT-PCR, Western blot	24495516
hsa-miR-362-5p	CYLD	Functional MTI	MIRT053602	Luciferase reporter assay	25449782
hsa-miR-362-5p	CYLD	Functional MTI	MIRT053602	Luciferase reporter assay	26893711
hsa-miR-362-5p	CYLD	Functional MTI	MIRT053602	Luciferase reporter assay	25909817
hsa-miR-363-3p	CDKN1A	Functional MTI	MIRT000591	qRT-PCR, Luciferase reporter assay, Western blot	20190813
hsa-miR-365a-3p	CCND1	Functional MTI	MIRT006242	Luciferase reporter assay, Western blot	22072615
hsa-miR-365a-3p	CCND1	Functional MTI	MIRT006242	Flow, In situ hybridization, Luciferase reporter assay, Microarray, qRT-PCR, Western blot	24149576
hsa-miR-365a-3p	CCND1	Functional MTI	MIRT006242	Luciferase reporter assay, Western blot	24936138
hsa-miR-372-3p	CDKN1A	Functional MTI	MIRT000590	qRT-PCR, Luciferase reporter assay, Western blot, Reporter assay;Other	18212054
hsa-miR-372-3p	CDKN1A	Functional MTI	MIRT000590	qRT-PCR, Luciferase reporter assay, Western blot	20190813
hsa-miR-373-3p	MYC	Functional MTI	MIRT006016	In situ hybridization, Microarray, qRT-PCR, Western blot	21059911
hsa-miR-374a-5p	CCND1	Functional MTI	MIRT241527	Luciferase reporter assay, Western blot	27191497
hsa-miR-375	TP53	Functional MTI	MIRT053533	Flow, Luciferase reporter assay, qRT-PCR, Western blot	23835407
hsa-miR-375	MYCN	Functional MTI	MIRT735188	Luciferase reporter assay, qRT-PCR, Western blot	25864587
hsa-miR-377-3p	TP53	Functional MTI	MIRT731725	Luciferase reporter assay, qRT-PCR, Western blot	25998046
hsa-miR-377-3p	E2F3	Functional MTI	MIRT734417	Luciferase reporter assay, Western blot	27351135
hsa-miR-377-3p	E2F3	Functional MTI	MIRT734417	Luciferase reporter assay, Microarray, qRT-PCR, Western blot	25889255
hsa-miR-378a-3p	MYC	Functional MTI	MIRT005482	Immunoblot, Luciferase reporter assay, qRT-PCR	21242960
hsa-miR-383-5p	CCND1	Functional MTI	MIRT054359	Immunofluorescence, Immunohistochemistry, In situ hybridization, Luciferase reporter assay, Microarray, QRTPCR, Western blot	23640459
hsa-miR-383-5p	CCND1	Functional MTI	MIRT054359	Luciferase reporter assay	25450356
hsa-miR-3940-5p	CCND1	Functional MTI	MIRT733409	qRT-PCR, Western blot	27988424
hsa-miR-423-3p	CDKN1A	Functional MTI	MIRT000589	qRT-PCR, Luciferase reporter assay, Western blot	20190813
hsa-miR-424-5p	CCND1	Functional MTI	MIRT000941	qRT-PCR, flow, Luciferase reporter assay, Western blot	18701644
hsa-miR-424-5p	CCND1	Functional MTI	MIRT000941	Luciferase reporter assay	19956200
hsa-miR-425-5p	CCND1	Functional MTI	MIRT016658	Luciferase reporter assay, Microarray, qRT-PCR, Western blot	23174883
hsa-miR-429	XIAP	Functional MTI	MIRT006675	Luciferase reporter assay, qRT-PCR, Western blot	21993663
hsa-miR-429	MYC	Functional MTI	MIRT016647	Reporter assay;Western blot;Other	21684154
hsa-miR-4295	CDKN1A	Functional MTI	MIRT735225	Luciferase reporter assay, qRT-PCR, Western blot	26231799
hsa-miR-449a	CCND1	Functional MTI	MIRT004679	Flow, Immunoblot, Luciferase reporter assay	20948989
hsa-miR-449a	CCND1	Functional MTI	MIRT004679	Flow, Luciferase reporter assay, qRT-PCR, Western blot	24248414
hsa-miR-449a	E2F3	Functional MTI	MIRT053065	Luciferase reporter assay, qRT-PCR, Western blot	24211326
hsa-miR-449a	E2F3	Functional MTI	MIRT053065	Flow, Luciferase reporter assay, qRT-PCR, Western blot	25871967
hsa-miR-449a	MYC	Functional MTI	MIRT105101	Luciferase reporter assay, Western blot	27250340
hsa-miR-449a	MYCN	Functional MTI	MIRT731559	Luciferase reporter assay	26891231
hsa-miR-449a	MYCN	Functional MTI	MIRT731559	Luciferase reporter assay	27764804
hsa-miR-449b-5p	MYCN	Functional MTI	MIRT733043	Luciferase reporter assay	27764804
hsa-miR-449c-5p	MYC	Functional MTI	MIRT007308	Luciferase reporter assay	23507140
hsa-miR-451a	MYC	Functional MTI	MIRT006358	Luciferase reporter assay	21464222
hsa-miR-451a	MYC	Functional MTI	MIRT006358	Luciferase reporter assay	25310895
hsa-miR-451a	MYC	Functional MTI	MIRT006358	Luciferase reporter assay, qRT-PCR, Western blot	27571748
hsa-miR-4782-3p	XIAP	Functional MTI	MIRT054447	Luciferase reporter assay, qRT-PCR, Western blot	24556800
hsa-miR-487b-3p	MYC	Functional MTI	MIRT437853	ChIP-seq, Luciferase reporter assay, Microarray, qRT-PCR, Western blot	23426183
hsa-miR-490-3p	CCND1	Functional MTI	MIRT054840	Luciferase reporter assay, qRT-PCR, Western blot	24440705
hsa-miR-491-5p	TP53	Functional MTI	MIRT054237	Flow cytometry, GFP reporter, QRTPCR, Western blot	23519249
hsa-miR-494-3p	MYC	Functional MTI	MIRT053756	Luciferase reporter assay, qRT-PCR, Western blot	24612089
hsa-miR-497-5p	E2F3	Functional MTI	MIRT099637	Luciferase reporter assay, Western blot	27430325
hsa-miR-498	BRCA1	Functional MTI	MIRT524739	Luciferase reporter assay, Microarray, qRT-PCR, Western blot	26933805
hsa-miR-500a-5p	CYLD	Functional MTI	MIRT054270	Immunoprecipitaion, Luciferase reporter assay, qRT-PCR, Western blot	25595906
hsa-miR-503-5p	CDKN1A	Functional MTI	MIRT000642	Luciferase reporter assay	19956200
hsa-miR-503-5p	CCND1	Functional MTI	MIRT001105	Immunohistochemistry, Luciferase reporter assay, Northern blot, qRT-PCR, Western blot	23731275
hsa-miR-503-5p	CCND1	Functional MTI	MIRT001105	Luciferase reporter assay, qRT-PCR, Western blot	19538740
hsa-miR-503-5p	CCND1	Functional MTI	MIRT001105	Luciferase reporter assay	19956200
hsa-miR-503-5p	E2F3	Functional MTI	MIRT734851	Luciferase reporter assay, Western blot	26722476
hsa-miR-504-5p	TP53	Functional MTI	MIRT016257	Reporter assay;Western blot;qRT-PCR	20542001
hsa-miR-512-5p	CDKN1A	Functional MTI	MIRT732136	Luciferase reporter assay, qRT-PCR, Western blot	26648284
hsa-miR-515-3p	CDKN1A	Functional MTI	MIRT000588	qRT-PCR, Luciferase reporter assay, Western blot	20190813
hsa-miR-518c-3p	TP53	Functional MTI	MIRT734280	Luciferase reporter assay, qRT-PCR, Western blot	25088422
hsa-miR-519a-3p	CDKN1A	Functional MTI	MIRT006234	Luciferase reporter assay, qRT-PCR, Western blot	22262409
hsa-miR-519a-3p	CDKN1A	Functional MTI	MIRT006234	qRT-PCR, Luciferase reporter assay, Western blot	24752803
hsa-miR-519a-3p	RB1	Functional MTI	MIRT068755	qRT-PCR, Luciferase reporter assay, Western blot	24752803
hsa-miR-519b-3p	CDKN1A	Functional MTI	MIRT000587	qRT-PCR, Luciferase reporter assay, Western blot	20190813
hsa-miR-519c-3p	CDKN1A	Functional MTI	MIRT006641	Luciferase reporter assay, qRT-PCR, Western blot	22262409
hsa-miR-519d-3p	CDKN1A	Functional MTI	MIRT000586	qRT-PCR, Luciferase reporter assay, Western blot	20190813
hsa-miR-519d-3p	CDKN1A	Functional MTI	MIRT000586	Luciferase reporter assay, Western blot	22262409
hsa-miR-519e-3p	CDKN1A	Functional MTI	MIRT000585	qRT-PCR, Luciferase reporter assay, Western blot	20190813
hsa-miR-520a-3p	CDKN1A	Functional MTI	MIRT000584	qRT-PCR, Luciferase reporter assay, Western blot	20190813
hsa-miR-520a-3p	CCND1	Functional MTI	MIRT268278	Luciferase reporter assay, qRT-PCR, Western blot	28123641
hsa-miR-520b	CDKN1A	Functional MTI	MIRT000583	qRT-PCR, Luciferase reporter assay, Western blot	20190813
hsa-miR-520b	CCND1	Functional MTI	MIRT006283	Luciferase reporter assay	22319632
hsa-miR-520h	CDKN1A	Functional MTI	MIRT000582	qRT-PCR, Luciferase reporter assay, Western blot	20190813
hsa-miR-561-3p	MYC	Functional MTI	MIRT733545	Luciferase reporter assay, Northern blot, qRT-PCR, Western blot	27725860
hsa-miR-572	CDKN1A	Functional MTI	MIRT000581	qRT-PCR, Luciferase reporter assay, Western blot	20190813
hsa-miR-576-3p	CCND1	Functional MTI	MIRT734524	qRT-PCR, Western blot, Luciferase reporter assay	25556372
hsa-miR-590-5p	RB1	Functional MTI	MIRT732681	Luciferase reporter assay	27036041
hsa-miR-599	MYC	Functional MTI	MIRT733881	Luciferase reporter assay, qRT-PCR, Western blot	27398141
hsa-miR-603	CCND1	Functional MTI	MIRT054910	Immunoblot, Luciferase reporter assay, qRT-PCR	23384558
hsa-miR-605-5p	TP53	Functional MTI	MIRT016155	Reporter assay;qRT-PCR	21217645
hsa-miR-638	TP53	Functional MTI	MIRT734281	Luciferase reporter assay, qRT-PCR, Western blot	25088422
hsa-miR-639	CDKN1A	Functional MTI	MIRT000580	qRT-PCR, Luciferase reporter assay, Western blot	20190813
hsa-miR-654-3p	CDKN1A	Functional MTI	MIRT000579	qRT-PCR, Luciferase reporter assay, Western blot	20190813
hsa-miR-657	CDKN1A	Functional MTI	MIRT000578	qRT-PCR, Luciferase reporter assay, Western blot	20190813
hsa-miR-663a	TP53	Functional MTI	MIRT732166	Luciferase reporter assay	27105517
hsa-miR-663a	CDKN1A	Functional MTI	MIRT732167	Luciferase reporter assay	27105517
hsa-miR-675-5p	RB1	Functional MTI	MIRT004749	Luciferase reporter assay, qRT-PCR	19926638
hsa-miR-7-5p	XIAP	Functional MTI	MIRT108696	qRT-PCR, Western blot	23742934
hsa-miR-708-5p	CCND1	Functional MTI	MIRT437387	Flow, qRT-PCR, Western blot	23754151
hsa-miR-744-5p	MYC	Functional MTI	MIRT037690	Luciferase reporter assay, Immunohistochemistry, Western blot	24991193
hsa-miR-874-3p	E2F3	Functional MTI	MIRT735359	qRT-PCR, Western blot	26631042
hsa-miR-9-5p	CCND1	Functional MTI	MIRT007372	Luciferase reporter assay	23383271
hsa-miR-922	CYLD	Functional MTI	MIRT735106	Luciferase reporter assay, qRT-PCR, Western blot	28184924
hsa-miR-92b-3p	PTEN	Functional MTI	MIRT438261	Luciferase reporter assay	24099768
hsa-miR-92b-3p	PTEN	Functional MTI	MIRT438261	Luciferase reporter assay, Western blot	28337377
hsa-miR-93-5p	CDKN1A	Functional MTI	MIRT000577	Luciferase reporter assay, Microarray, Western blot	18328430
hsa-miR-93-5p	CDKN1A	Functional MTI	MIRT000577	qRT-PCR, Luciferase reporter assay, Western blot	19153141
hsa-miR-93-5p	CDKN1A	Functional MTI	MIRT000577	qRT-PCR, Luciferase reporter assay, Western blot	20190813
hsa-miR-93-5p	CDKN1A	Functional MTI	MIRT000577	Luciferase reporter assay, Western blot	27185265
hsa-miR-93-5p	CDKN1A	Functional MTI	MIRT000577	qRT-PCR, Western blot	28356951
hsa-miR-95-3p	CDKN1A	Functional MTI	MIRT734645	Immunohistochemistry, Luciferase reporter assay, qRT-PCR, Western blot	27698442
hsa-miR-95-3p	CCND1	Functional MTI	MIRT479773	Luciferase reporter assay, qRT-PCR, Western blot	25971210
hsa-miR-96-5p	CDKN1A	Functional MTI	MIRT003414	Luciferase reporter assay, Microarray, qRT-PCR, Western blot	19422085
hsa-miR-96-5p	CDKN1A	Functional MTI	MIRT003414	Luciferase reporter assay, Western blot	26582573
hsa-miR-98-5p	HMGA2	Functional MTI	MIRT002999	Northern blot, qRT-PCR, Western blot;Other	17222355
hsa-miR-98-5p	HMGA2	Functional MTI	MIRT002999	Luciferase reporter assay, Western blot	24392454
hsa-miR-98-5p	MYC	Functional MTI	MIRT003438	Luciferase reporter assay, Northern blot, qRT-PCR, ChIP	19528081
hsa-miR-98-5p	CCND2	Functional MTI	MIRT134736	GFP reporter assay	26840039
hsa-miR-98-5p	BCL2	Functional MTI	MIRT735452	Luciferase reporter assay, Western blot	27422937

## Sheet: Biocarta pathways
#Name	Reference	Hits	Score	Expected Score	P-value	Info	Regulation_direction
ATM Signaling Pathway	http://cgap.nci.nih.gov/Pathways/BioCarta/h_atmPathway	3	3	0.0171535	7.89369e-07	BRCA1,CDKN1A,TP53	1
BTG family proteins and cell cycle regulation	http://cgap.nci.nih.gov/Pathways/BioCarta/h_btg2Pathway	3	3	0.00943444	2.06635e-07	CCND1,RB1,TP53	1
CTCF: First Multivalent Nuclear Factor	http://cgap.nci.nih.gov/Pathways/BioCarta/h_ctcfPathway	3	3	0.0205842	1.14423e-06	MYC,PTEN,TP53	1
Cell Cycle: G1/S Check Point	http://cgap.nci.nih.gov/Pathways/BioCarta/h_g1Pathway	4	4	0.0240149	2.24538e-08	CCND1,CDKN1A,RB1,TP53	1
Cell Cycle: G2/M Checkpoint	http://cgap.nci.nih.gov/Pathways/BioCarta/h_g2Pathway	4	4	0.0205842	1.55699e-08	BRCA1,CDKN1A,TP53,WEE1	1
Cyclins and Cell Cycle Regulation	http://cgap.nci.nih.gov/Pathways/BioCarta/h_cellcyclePathway	4	4	0.0197266	1.55699e-08	CCND1,CCND2,CDKN1A,RB1	1
Hypoxia and p53 in the Cardiovascular system	http://cgap.nci.nih.gov/Pathways/BioCarta/h_p53hypoxiaPathway	3	3	0.0180112	8.28398e-07	CDKN1A,HIF1A,TP53	1
Influence of Ras and Rho proteins on G1 to S Transition	http://cgap.nci.nih.gov/Pathways/BioCarta/h_RacCycDPathway	3	3	0.0222996	1.34595e-06	CCND1,CDKN1A,RB1	1
RB Tumor Suppressor/Checkpoint Signaling in response to DNA damage	http://cgap.nci.nih.gov/Pathways/BioCarta/h_rbPathway	3	3	0.0111498	2.98156e-07	RB1,TP53,WEE1	1
Telomeres, Telomerase, Cellular Aging, and Immortality	http://cgap.nci.nih.gov/Pathways/BioCarta/h_telPathway	3	3	0.0145805	5.30551e-07	MYC,RB1,TP53	1
Tumor Suppressor Arf Inhibits Ribosomal Biogenesis	http://cgap.nci.nih.gov/Pathways/BioCarta/h_arfPathway	3	3	0.0145805	5.30551e-07	MYC,RB1,TP53	1
p53 Signaling Pathway	http://cgap.nci.nih.gov/Pathways/BioCarta/h_p53Pathway	4	4	0.0137228	8.03404e-09	CCND1,CDKN1A,RB1,TP53	1

## Sheet: Biological process
#Name	Reference	Hits	Score	Expected Score	P-value	Info	Regulation_direction
DNA damage checkpoint	info:{"super-categories": "['DNA integrity checkpoint', 'cellular response to stress', 'negative regulation of biological process', 'regulation of cellular process']", "namespace": "biological_process", "id": "GO:0000077", "def": "\"A cell cycle checkpoint that regulates progression through the cell cycle in response to DNA damage. A DNA damage checkpoint may blocks cell cycle progression (in G1,…	3	3	0.058322	5.69841e-05	CCND1,HMGA2,TP53	1
DNA damage response, signal transduction by p53 class mediator	info:{"super-categories": "['cellular response to stress', 'intracellular signal transduction', 'regulation of cellular process']", "namespace": "biological_process", "id": "GO:0030330", "def": "\"A cascade of processes induced by the cell cycle regulator phosphoprotein p53, or an equivalent protein, in response to the detection of DNA damage.\" [GOC:go_curators]", "name": "DNA damage response, s…	3	3	0.0668987	7.83389e-05	BRCA1,CDKN1A,TP53	1
DNA damage response, signal transduction by p53 class mediator resulting in transcription of p21 class mediator	info:{"super-categories": "['cellular response to stress', 'intracellular signal transduction', 'regulation of cellular process']", "namespace": "biological_process", "id": "GO:0006978", "def": "\"A cascade of processes induced by the cell cycle regulator phosphoprotein p53, or an equivalent protein, resulting in the induction of the transcription of p21 (also known as WAF1, CIP1 and SDI1) or any…	3	3	0.0120075	1.0392e-06	BRCA1,CDKN1A,TP53	1
DNA damage response, signal transduction resulting in transcription	info:{"super-categories": "['cellular response to stress', 'intracellular signal transduction', 'regulation of cellular process']", "namespace": "biological_process", "id": "GO:0042772", "def": "\"A cascade of processes initiated in response to the detection of DNA damage, and resulting in the induction of transcription.\" [GOC:go_curators]", "name": "DNA damage response, signal transduction resu…	3	3	0.0128651	1.21717e-06	BRCA1,CDKN1A,TP53	1
DNA metabolic process	info:{"super-categories": "['cellular aromatic compound metabolic process', 'cellular macromolecule metabolic process', 'cellular nitrogen compound metabolic process', 'heterocycle metabolic process', 'macromolecule metabolic process', 'nucleobase-containing compound metabolic process', 'organic cyclic compound metabolic process']", "namespace": "biological_process", "id": "GO:0006259", "def": "\…	3	3	0.609808	0.0228611	BRCA1,HMGA2,TP53	1
DNA repair	info:{"super-categories": "['cellular aromatic compound metabolic process', 'cellular macromolecule metabolic process', 'cellular nitrogen compound metabolic process', 'cellular response to stress', 'heterocycle metabolic process', 'macromolecule metabolic process', 'nucleobase-containing compound metabolic process', 'organic cyclic compound metabolic process']", "namespace": "biological_process"…	3	3	0.406539	0.00808425	BRCA1,HMGA2,TP53	1
DNA-templated transcription, initiation	info:{"super-categories": "['cellular aromatic compound metabolic process', 'cellular biosynthetic process', 'cellular nitrogen compound metabolic process', 'heterocycle metabolic process', 'macromolecule metabolic process', 'nucleobase-containing compound metabolic process', 'organic cyclic compound metabolic process', 'organic substance biosynthetic process']", "namespace": "biological_process"…	4	4	0.164674	4.37131e-05	CCND1,CDKN1A,E2F3,PTEN	1
G1/S transition of mitotic cell cycle	info:{"super-categories": "['cell cycle phase transition', 'mitotic cell cycle process']", "namespace": "biological_process", "id": "GO:0000082", "def": "\"The mitotic cell cycle transition by which a cell in G1 commits to S phase. The process begins with the build up of G1 cyclin-dependent kinase (G1 CDK), resulting in the activation of transcription of G1 cyclins. The process ends with the posi…	4	4	0.0849099	5.04487e-06	CCND1,CDKN1A,MYC,RB1	1
RNA biosynthetic process	info:{"super-categories": "['cellular aromatic compound metabolic process', 'cellular biosynthetic process', 'cellular nitrogen compound metabolic process', 'heterocycle metabolic process', 'macromolecule metabolic process', 'nucleobase-containing compound metabolic process', 'organic cyclic compound metabolic process', 'organic substance biosynthetic process']", "namespace": "biological_process"…	7	7	0.531759	2.0146e-06	CCND1,CDKN1A,E2F3,HIF1A,PTEN,STAT3,TP53	1
RNA metabolic process	info:{"super-categories": "['cellular aromatic compound metabolic process', 'cellular nitrogen compound metabolic process', 'heterocycle metabolic process', 'macromolecule metabolic process', 'nucleobase-containing compound metabolic process', 'organic cyclic compound metabolic process']", "namespace": "biological_process", "id": "GO:0016070", "def": "\"The cellular chemical reactions and pathway…	7	7	1.36027	0.000321637	CCND1,CDKN1A,E2F3,HIF1A,PTEN,STAT3,TP53	1
Ras protein signal transduction	info:{"super-categories": "['intracellular signal transduction', 'regulation of cellular process']", "namespace": "biological_process", "id": "GO:0007265", "def": "\"A series of molecular signals within the cell that are mediated by a member of the Ras superfamily of proteins switching to a GTP-bound active state.\" [GOC:bf]", "name": "Ras protein signal transduction"}	3	3	0.207558	0.00137893	CDKN1A,RB1,TP53	1
T cell lineage commitment	info:{"super-categories": "['cell fate commitment']", "namespace": "biological_process", "id": "GO:0002360", "def": "\"The process in which a lymphoid progenitor cell becomes committed to becoming any type of T cell.\" [GOC:add, ISBN:0781735149]", "name": "T cell lineage commitment"}	3	3	0.0171535	2.64481e-06	CYLD,STAT3,TP53	1
Wnt signaling pathway	info:{"super-categories": "['cell surface receptor signaling pathway', 'regulation of cellular process']", "namespace": "biological_process", "id": "GO:0016055", "def": "\"The series of molecular signals initiated by binding of a Wnt protein to a frizzled family receptor on the surface of the target cell and ending with a change in cell state.\" [GOC:dph, GOC:go_curators, PMID:11532397]", "name":…	4	4	0.288179	0.000274208	CCND1,CYLD,PTEN,XIAP	1
aging	info:{"super-categories": "[]", "namespace": "biological_process", "id": "GO:0007568", "def": "\"A developmental process that is a deterioration and loss of function over time. Aging includes loss of functions such as resistance to disease, homeostasis, and fertility, as well as wear and tear. Aging includes cellular senescence, but is more inclusive. May precede death and may succeed development…	5	5	0.213561	6.08742e-06	CDKN1A,HMGA2,PTEN,STAT3,TP53	1
ameboidal-type cell migration	info:{"super-categories": "['cell migration', 'cell motility']", "namespace": "biological_process", "id": "GO:0001667", "def": "\"Cell migration that is accomplished by extension and retraction of a pseudopodium.\" [GOC:dph]", "name": "ameboidal-type cell migration"}	3	3	0.134655	0.00046686	HIF1A,PTEN,VEGFA	1
anatomical structure development	info:{"super-categories": "[]", "namespace": "biological_process", "id": "GO:0048856", "def": "\"The biological process whose specific outcome is the progression of an anatomical structure from an initial condition to its mature state. This process begins with the formation of the structure and ends with the mature structure, whatever form that may be including its natural destruction. An anatomi…	11	11	2.83891	3.16123e-05	BCL2L11,BRCA1,CCND1,CDKN1A,HIF1A,HMGA2,PTEN,RB1,STAT3,TP53,VEGFA	1
anatomical structure formation involved in morphogenesis	info:{"super-categories": "[]", "namespace": "biological_process", "id": "GO:0048646", "def": "\"The developmental process pertaining to the initial formation of an anatomical structure from unspecified parts. This process begins with the specific processes that contribute to the appearance of the discrete structure and ends when the structural rudiment is recognizable. An anatomical structure is…	5	5	0.608092	0.000390158	BCL2L11,HIF1A,PTEN,TP53,VEGFA	1
anatomical structure morphogenesis	info:{"super-categories": "[]", "namespace": "biological_process", "id": "GO:0009653", "def": "\"The process in which anatomical structures are generated and organized. Morphogenesis pertains to the creation of form.\" [GOC:go_curators, ISBN:0521436125]", "name": "anatomical structure morphogenesis"}	8	8	1.20589	2.28354e-05	BCL2L11,HIF1A,MYC,PTEN,RB1,TP53,VEGFA,WEE1	1
angiogenesis	info:{"super-categories": "[]", "namespace": "biological_process", "id": "GO:0001525", "def": "\"Blood vessel formation when new vessels emerge from the proliferation of pre-existing blood vessels.\" [ISBN:0878932453]", "name": "angiogenesis"}	3	3	0.233288	0.00186676	HIF1A,PTEN,VEGFA	1
animal organ development	info:{"super-categories": "[]", "namespace": "biological_process", "id": "GO:0048513", "def": "\"Development of a tissue or tissues that work together to perform a specific function or functions. Development pertains to the process whose specific outcome is the progression of a structure over time, from its formation to the mature structure. Organs are commonly observed as visibly distinct struct…	7	7	1.07295	8.68096e-05	BCL2L11,CCND1,CDKN1A,HIF1A,PTEN,TP53,VEGFA	1
animal organ morphogenesis	info:{"super-categories": "[]", "namespace": "biological_process", "id": "GO:0009887", "def": "\"Morphogenesis of an animal organ. An organ is defined as a tissue or set of tissues that work together to perform a specific function or functions. Morphogenesis is the process in which anatomical structures are generated and organized. Organs are commonly observed as visibly distinct structures, but …	3	3	0.43913	0.00990824	BCL2L11,PTEN,VEGFA	1
apoptotic process	info:{"super-categories": "['programmed cell death']", "namespace": "biological_process", "id": "GO:0006915", "def": "\"A programmed cell death process which begins when a cell receives an internal (e.g. DNA damage) or external signal (e.g. an extracellular death ligand), and proceeds through a series of biochemical events (signaling pathway phase) which trigger an execution phase. The execution …	7	7	0.558347	2.64481e-06	BCL2L11,BRCA1,MYC,PTEN,RB1,TP53,XIAP	1
apoptotic signaling pathway	info:{"super-categories": "['regulation of cellular process']", "namespace": "biological_process", "id": "GO:0097190", "def": "\"A series of molecular signals which triggers the apoptotic death of a cell. The pathway starts with reception of a signal, and ends when the execution phase of apoptosis is triggered.\" [GOC:mtg_apoptosis]", "name": "apoptotic signaling pathway"}	4	4	0.222996	0.0001178	BCL2L11,BRCA1,CDKN1A,TP53	1
aromatic compound biosynthetic process	info:{"super-categories": "['cellular aromatic compound metabolic process', 'cellular biosynthetic process']", "namespace": "biological_process", "id": "GO:0019438", "def": "\"The chemical reactions and pathways resulting in the formation of aromatic compounds, any substance containing an aromatic carbon ring.\" [GOC:ai]", "name": "aromatic compound biosynthetic process"}	7	7	0.952878	4.73974e-05	CCND1,CDKN1A,E2F3,HIF1A,PTEN,STAT3,TP53	1
behavior	info:{"super-categories": "[]", "namespace": "biological_process", "id": "GO:0007610", "def": "\"The internally coordinated responses (actions or inactions) of animals (individuals or groups) to internal or external stimuli, via a mechanism that involves nervous system activity.\" [GOC:ems, GOC:jl, ISBN:0395448956, PMID:20160973]", "name": "behavior"}	4	4	0.480299	0.00142395	HIF1A,PTEN,STAT3,TP53	1
biological_process	info:{"super-categories": "[]", "namespace": "biological_process", "id": "GO:0008150", "def": "\"A biological process represents a specific objective that the organism is genetically programmed to achieve. Biological processes are often described by their outcome or ending state, e.g., the biological process of cell division results in the creation of two daughter cells (a divided cell) from a si…	17	17	14.4862	0.0669133	BCL2L11,BRCA1,CCND1,CCND2,CDKN1A,CYLD,E2F3,HIF1A,HMGA2,MYC,PTEN,RB1,STAT3,TP53,VEGFA,WEE1,XIAP	1
biosynthetic process	info:{"super-categories": "[]", "namespace": "biological_process", "id": "GO:0009058", "def": "\"The chemical reactions and pathways resulting in the formation of substances; typically the energy-requiring part of metabolism in which simpler substances are transformed into more complex ones.\" [GOC:curators, ISBN:0198547684]", "name": "biosynthetic process"}	8	8	2.12789	0.000731039	BRCA1,CCND1,CDKN1A,E2F3,HIF1A,PTEN,STAT3,TP53	1
body fluid secretion	info:{"super-categories": "['regulation of body fluid levels', 'transport']", "namespace": "biological_process", "id": "GO:0007589", "def": "\"The controlled release of a fluid by a cell or tissue in an animal.\" [GOC:ai, GOC:dph, GOC:mah, GOC:tb]", "name": "body fluid secretion"}	3	3	0.0617527	6.45932e-05	CCND1,HIF1A,VEGFA	1
catabolic process	info:{"super-categories": "[]", "namespace": "biological_process", "id": "GO:0009056", "def": "\"The chemical reactions and pathways resulting in the breakdown of substances, including the breakdown of carbon compounds with the liberation of energy for use by the cell or organism.\" [ISBN:0198547684]", "name": "catabolic process"}	3	3	1.65875	0.227443	CYLD,PTEN,TP53	1
cation homeostasis	info:{"super-categories": "['homeostatic process']", "namespace": "biological_process", "id": "GO:0055080", "def": "\"Any process involved in the maintenance of an internal steady state of cations within an organism or cell.\" [GOC:ceb, GOC:jid, GOC:mah]", "name": "cation homeostasis"}	4	4	0.595227	0.00291773	HIF1A,MYC,TP53,XIAP	1
cell aging	info:{"super-categories": "[]", "namespace": "biological_process", "id": "GO:0007569", "def": "\"An aging process that has as participant a cell after a cell has stopped dividing. Cell aging may occur when a cell has temporarily stopped dividing through cell cycle arrest (GO:0007050) or when a cell has permanently stopped dividing, in which case it is undergoing cellular senescence (GO:0090398). …	3	3	0.055749	5.11425e-05	CDKN1A,HMGA2,TP53	1
cell communication	info:{"super-categories": "[]", "namespace": "biological_process", "id": "GO:0007154", "def": "\"Any process that mediates interactions between a cell and its surroundings. Encompasses interactions such as signaling or attachment between one cell and another cell, between a cell and an extracellular matrix, or between a cell and any other aspect of its environment.\" [GOC:mah]", "name": "cell com…	4	4	0.732455	0.00594812	CDKN1A,HMGA2,PTEN,TP53	1
cell cycle G1/S phase transition	info:{"super-categories": "['cell cycle phase transition']", "namespace": "biological_process", "id": "GO:0044843", "def": "\"The cell cycle process by which a cell in G1 phase commits to S phase.\" [GOC:mtg_cell_cycle]", "name": "cell cycle G1/S phase transition"}	4	4	0.0857676	5.20413e-06	CCND1,CDKN1A,MYC,RB1	1
cell cycle arrest	info:{"super-categories": "['negative regulation of biological process', 'regulation of cellular process']", "namespace": "biological_process", "id": "GO:0007050", "def": "\"A regulatory process that halts progression through the cell cycle during one of the normal phases (G1, S, G2, M).\" [GOC:dph, GOC:mah, GOC:tb]", "name": "cell cycle arrest"}	4	4	0.122648	1.66341e-05	CDKN1A,MYC,RB1,TP53	1
cell cycle phase transition	info:{"super-categories": "[]", "namespace": "biological_process", "id": "GO:0044770", "def": "\"The cell cycle process by which a cell commits to entering the next cell cycle phase.\" [GOC:mtg_cell_cycle]", "name": "cell cycle phase transition"}	6	6	0.22128	3.45001e-07	CCND1,CCND2,CDKN1A,MYC,RB1,WEE1	1
cell death	info:{"super-categories": "[]", "namespace": "biological_process", "id": "GO:0008219", "def": "\"Any biological process that results in permanent cessation of all vital functions of a cell. A cell should be considered dead when any one of the following molecular or morphological criteria is met: (1) the cell has lost the integrity of its plasma membrane; (2) the cell, including its nucleus, has u…	8	8	0.713587	9.23129e-07	BCL2L11,BRCA1,CYLD,MYC,PTEN,RB1,TP53,XIAP	1
cell differentiation	info:{"super-categories": "[]", "namespace": "biological_process", "id": "GO:0030154", "def": "\"The process in which relatively unspecialized cells, e.g. embryonic or regenerative cells, acquire specialized structural and/or functional features that characterize the cells, tissues, or organs of the mature organism or some other relatively stable phase of the organism's life history. Differentiat…	7	7	1.5867	0.000731917	CCND1,HIF1A,HMGA2,RB1,STAT3,TP53,VEGFA	1
cell division	info:{"super-categories": "[]", "namespace": "biological_process", "id": "GO:0051301", "def": "\"The process resulting in division and partitioning of components of a cell to form more cells; may or may not be accompanied by the physical separation of a cell into distinct, individually membrane-bounded daughter cells.\" [GOC:di, GOC:go_curators, GOC:pr]", "name": "cell division"}	5	5	0.335351	3.58247e-05	CCND1,CCND2,HMGA2,RB1,WEE1	1
cell fate commitment	info:{"super-categories": "[]", "namespace": "biological_process", "id": "GO:0045165", "def": "\"The commitment of cells to specific cell fates and their capacity to differentiate into particular kinds of cells. Positional information is established through protein signals that emanate from a localized source within a cell (the initial one-cell zygote) or within a developmental field.\" [ISBN:071…	3	3	0.123505	0.000376066	CYLD,STAT3,TP53	1
cell maturation	info:{"super-categories": "[]", "namespace": "biological_process", "id": "GO:0048469", "def": "\"A developmental process, independent of morphogenetic (shape) change, that is required for a cell to attain its fully functional state.\" [GOC:go_curators]", "name": "cell maturation"}	4	4	0.117502	1.45433e-05	CDKN1A,HIF1A,RB1,VEGFA	1
cell migration	info:{"super-categories": "['cell motility']", "namespace": "biological_process", "id": "GO:0016477", "def": "\"The controlled self-propelled movement of a cell from one site to a destination guided by molecular cues. Cell migration is a central process in the development and maintenance of multicellular organisms.\" [GOC:cjm, GOC:dph, GOC:ems, GOC:pf, http://en.wikipedia.org/wiki/Cell_migration]…	3	3	0.71959	0.0344945	HIF1A,PTEN,VEGFA	1
cell motility	info:{"super-categories": "[]", "namespace": "biological_process", "id": "GO:0048870", "def": "\"Any process involved in the controlled self-propelled movement of a cell that results in translocation of the cell from one place to another.\" [GOC:dgh, GOC:dph, GOC:isa_complete, GOC:mlg]", "name": "cell motility"}	3	3	0.796781	0.0440996	HIF1A,PTEN,VEGFA	1
cell population proliferation	info:{"super-categories": "[]", "namespace": "biological_process", "id": "GO:0008283", "def": "\"The multiplication or reproduction of cells, resulting in the expansion of a cell population.\" [GOC:mah, GOC:mb]", "name": "cell population proliferation"}	5	5	0.444276	0.000112148	CCND1,HMGA2,PTEN,STAT3,TP53	1
cell projection organization	info:{"super-categories": "[]", "namespace": "biological_process", "id": "GO:0030030", "def": "\"A process that is carried out at the cellular level which results in the assembly, arrangement of constituent parts, or disassembly of a prolongation or process extending from a cell, e.g. a flagellum or axon.\" [GOC:jl, GOC:mah, http://www.cogsci.princeton.edu/~wn/]", "name": "cell projection organiz…	3	3	0.680137	0.0300692	PTEN,RB1,WEE1	1
cell surface receptor signaling pathway	info:{"super-categories": "['regulation of cellular process']", "namespace": "biological_process", "id": "GO:0007166", "def": "\"A series of molecular signals initiated by activation of a receptor on the surface of a cell. The pathway begins with binding of an extracellular ligand to a cell surface receptor, or for receptors that signal in the absence of a ligand, by ligand-withdrawal or the acti…	11	11	1.84486	9.2197e-07	BCL2L11,CCND1,CDKN1A,CYLD,HIF1A,MYC,PTEN,STAT3,TP53,VEGFA,XIAP	1
cell surface receptor signaling pathway involved in cell-cell signaling	info:{"super-categories": "['cell surface receptor signaling pathway', 'regulation of cellular process']", "namespace": "biological_process", "id": "GO:1905114", "def": "\"Any cell surface receptor signaling pathway that is involved in cell-cell signaling.\" [GO_REF:0000060, GOC:TermGenie, ISBN:0-7167-3051-0]", "name": "cell surface receptor signaling pathway involved in cell-cell signaling"}	4	4	0.294183	0.000294369	CCND1,CYLD,PTEN,XIAP	1
cellular aromatic compound metabolic process	info:{"super-categories": "[]", "namespace": "biological_process", "id": "GO:0006725", "def": "\"The chemical reactions and pathways involving aromatic compounds, any organic compound characterized by one or more planar rings, each of which contains conjugated double bonds and delocalized pi electrons, as carried out by individual cells.\" [GOC:ai, ISBN:0198506732]", "name": "cellular aromatic co…	9	9	2.46839	0.000361977	BRCA1,CCND1,CDKN1A,E2F3,HIF1A,HMGA2,PTEN,STAT3,TP53	1
cellular cation homeostasis	info:{"super-categories": "['cellular chemical homeostasis', 'homeostatic process']", "namespace": "biological_process", "id": "GO:0030003", "def": "\"Any process involved in the maintenance of an internal steady state of cations at the level of a cell.\" [GOC:ceb, GOC:mah]", "name": "cellular cation homeostasis"}	3	3	0.536048	0.016588	HIF1A,MYC,TP53	1
cellular chemical homeostasis	info:{"super-categories": "['homeostatic process']", "namespace": "biological_process", "id": "GO:0055082", "def": "\"Any biological process involved in the maintenance of an internal steady state of a chemical at the level of the cell.\" [GOC:isa_complete, GOC:jid]", "name": "cellular chemical homeostasis"}	3	3	0.6201	0.0237642	HIF1A,MYC,TP53	1
cellular component assembly	info:{"super-categories": "[]", "namespace": "biological_process", "id": "GO:0022607", "def": "\"The aggregation, arrangement and bonding together of a cellular component.\" [GOC:isa_complete]", "name": "cellular component assembly"}	5	5	1.98381	0.0415057	CYLD,HMGA2,MYC,PTEN,TP53	1
cellular homeostasis	info:{"super-categories": "['homeostatic process']", "namespace": "biological_process", "id": "GO:0019725", "def": "\"Any process involved in the maintenance of an internal steady state at the level of the cell.\" [GOC:isa_complete, GOC:jl, ISBN:0395825172]", "name": "cellular homeostasis"}	3	3	0.733313	0.0361078	HIF1A,MYC,TP53	1
cellular ion homeostasis	info:{"super-categories": "['cellular chemical homeostasis', 'homeostatic process']", "namespace": "biological_process", "id": "GO:0006873", "def": "\"Any process involved in the maintenance of an internal steady state of ions at the level of a cell.\" [GOC:mah]", "name": "cellular ion homeostasis"}	3	3	0.547197	0.0174789	HIF1A,MYC,TP53	1
cellular localization	info:{"super-categories": "[]", "namespace": "biological_process", "id": "GO:0051641", "def": "\"A cellular localization process whereby a substance or cellular entity, such as a protein complex or organelle, is transported to, and/or maintained in, a specific location within a cell including the localization of substances or cellular entities to the cell membrane.\" [GOC:tb, GOC:vw]", "name": "c…	6	6	1.84572	0.00786515	BCL2L11,CDKN1A,HIF1A,RB1,STAT3,TP53	1
cellular macromolecule biosynthetic process	info:{"super-categories": "['cellular biosynthetic process', 'cellular macromolecule metabolic process', 'macromolecule metabolic process', 'organic substance biosynthetic process']", "namespace": "biological_process", "id": "GO:0034645", "def": "\"The chemical reactions and pathways resulting in the formation of a macromolecule, any molecule of high relative molecular mass, the structure of whic…	4	4	0.861965	0.0101676	BRCA1,HIF1A,STAT3,TP53	1
cellular metabolic process	info:{"super-categories": "[]", "namespace": "biological_process", "id": "GO:0044237", "def": "\"The chemical reactions and pathways by which individual cells transform chemical substances.\" [GOC:go_curators]", "name": "cellular metabolic process"}	14	14	6.26532	0.000275193	BRCA1,CCND1,CCND2,CDKN1A,CYLD,E2F3,HIF1A,HMGA2,MYC,PTEN,STAT3,TP53,WEE1,XIAP	1
cellular nitrogen compound metabolic process	info:{"super-categories": "[]", "namespace": "biological_process", "id": "GO:0034641", "def": "\"The chemical reactions and pathways involving various organic and inorganic nitrogenous compounds, as carried out by individual cells.\" [GOC:mah]", "name": "cellular nitrogen compound metabolic process"}	9	9	2.71026	0.000679177	BRCA1,CCND1,CDKN1A,E2F3,HIF1A,HMGA2,PTEN,STAT3,TP53	1
cellular process	info:{"super-categories": "[]", "namespace": "biological_process", "id": "GO:0009987", "def": "\"Any process that is carried out at the cellular level, but not necessarily restricted to a single cell. For example, cell communication occurs among more than one cell, but occurs at the cellular level.\" [GOC:go_curators, GOC:isa_complete]", "name": "cellular process"}	17	17	11.8051	0.00244667	BCL2L11,BRCA1,CCND1,CCND2,CDKN1A,CYLD,E2F3,HIF1A,HMGA2,MYC,PTEN,RB1,STAT3,TP53,VEGFA,WEE1,XIAP	1
cellular protein localization	info:{"super-categories": "['cellular macromolecule localization', 'protein localization']", "namespace": "biological_process", "id": "GO:0034613", "def": "\"Any process in which a protein is transported to, and/or maintained in, a specific location at the level of a cell. Localization at the cellular level encompasses movement within the cell, from within the cell to the cell surface, or from on…	5	5	0.897987	0.0018474	BCL2L11,CDKN1A,RB1,STAT3,TP53	1
cellular protein metabolic process	info:{"super-categories": "['cellular macromolecule metabolic process', 'macromolecule metabolic process', 'organonitrogen compound metabolic process', 'protein metabolic process']", "namespace": "biological_process", "id": "GO:0044267", "def": "\"The chemical reactions and pathways involving a specific protein, rather than of proteins in general, occurring at the level of an individual cell. Inc…	11	11	2.81575	2.98588e-05	BRCA1,CCND1,CCND2,CYLD,HIF1A,HMGA2,MYC,PTEN,TP53,WEE1,XIAP	1
cellular protein modification process	info:{"super-categories": "['cellular macromolecule metabolic process', 'macromolecule metabolic process', 'organonitrogen compound metabolic process', 'protein metabolic process']", "namespace": "biological_process", "id": "GO:0006464", "def": "\"The covalent alteration of one or more amino acids occurring in proteins, peptides and nascent polypeptides (co-translational, post-translational modif…	11	11	2.54644	1.33937e-05	BRCA1,CCND1,CCND2,CYLD,HIF1A,HMGA2,MYC,PTEN,TP53,WEE1,XIAP	1
cellular response to DNA damage stimulus	info:{"super-categories": "['cellular response to stress']", "namespace": "biological_process", "id": "GO:0006974", "def": "\"Any process that results in a change in state or activity of a cell (in terms of movement, secretion, enzyme production, gene expression, etc.) as a result of a stimulus indicating damage to its DNA from environmental insults or errors during metabolism.\" [GOC:go_curators…	8	8	0.630392	4.18981e-07	BCL2L11,BRCA1,CCND1,CDKN1A,HMGA2,MYC,TP53,XIAP	1
cellular response to UV	info:{"super-categories": "['cellular response to abiotic stimulus', 'cellular response to environmental stimulus', 'response to radiation']", "namespace": "biological_process", "id": "GO:0034644", "def": "\"Any process that results in a change in state or activity of a cell (in terms of movement, secretion, enzyme production, gene expression, etc.) as a result of an ultraviolet radiation (UV lig…	3	3	0.0660411	7.65077e-05	CDKN1A,MYC,TP53	1
cellular response to cytokine stimulus	info:{"super-categories": "['cellular response to chemical stimulus', 'response to organic substance']", "namespace": "biological_process", "id": "GO:0071345", "def": "\"Any process that results in a change in state or activity of a cell (in terms of movement, secretion, enzyme production, gene expression, etc.) as a result of a cytokine stimulus.\" [GOC:mah]", "name": "cellular response to cytok…	3	3	0.374805	0.00656481	BRCA1,HIF1A,STAT3	1
cellular response to decreased oxygen levels	info:{"super-categories": "['cellular response to chemical stimulus', 'response to oxygen levels']", "namespace": "biological_process", "id": "GO:0036294", "def": "\"Any process that results in a change in state or activity of a cell (in terms of movement, secretion, enzyme production, gene expression, etc.) as a result of a stimulus reflecting a decline in the level of oxygen.\" [GOC:al]", "name…	5	5	0.102063	3.01889e-07	HIF1A,MYC,PTEN,TP53,VEGFA	1
cellular response to drug	info:{"super-categories": "['cellular response to chemical stimulus', 'response to drug']", "namespace": "biological_process", "id": "GO:0035690", "def": "\"Any process that results in a change in state or activity of a cell (in terms of movement, secretion, enzyme production, gene expression, etc.) as a result of a drug stimulus. A drug is a substance used in the diagnosis, treatment or preventi…	4	4	0.265022	0.000210785	BRCA1,MYC,PTEN,TP53	1
cellular response to hormone stimulus	info:{"super-categories": "['cellular response to chemical stimulus', 'cellular response to endogenous stimulus', 'response to hormone', 'response to organic substance']", "namespace": "biological_process", "id": "GO:0032870", "def": "\"Any process that results in a change in state or activity of a cell (in terms of movement, secretion, enzyme production, gene expression, etc.) as a result of a h…	3	3	0.295041	0.00345391	BCL2L11,PTEN,STAT3	1
cellular response to hypoxia	info:{"super-categories": "['cellular response to chemical stimulus', 'cellular response to stress', 'response to hypoxia', 'response to oxygen levels']", "namespace": "biological_process", "id": "GO:0071456", "def": "\"Any process that results in a change in state or activity of a cell (in terms of movement, secretion, enzyme production, gene expression, etc.) as a result of a stimulus indicatin…	5	5	0.0934867	2.04874e-07	HIF1A,MYC,PTEN,TP53,VEGFA	1
cellular response to light stimulus	info:{"super-categories": "['cellular response to abiotic stimulus', 'cellular response to environmental stimulus', 'response to radiation']", "namespace": "biological_process", "id": "GO:0071482", "def": "\"Any process that results in a change in state or activity of a cell (in terms of movement, secretion, enzyme production, gene expression, etc.) as a result of a light stimulus, electromagneti…	3	3	0.0909137	0.000175634	CDKN1A,MYC,TP53	1
cellular response to organic cyclic compound	info:{"super-categories": "['cellular response to chemical stimulus', 'response to organic substance']", "namespace": "biological_process", "id": "GO:0071407", "def": "\"Any process that results in a change in state or activity of a cell (in terms of movement, secretion, enzyme production, gene expression, etc.) as a result of an organic cyclic compound stimulus.\" [GOC:mah]", "name": "cellular r…	3	3	0.313909	0.00407879	BCL2L11,BRCA1,STAT3	1
cellular response to organic substance	info:{"super-categories": "['cellular response to chemical stimulus', 'response to organic substance']", "namespace": "biological_process", "id": "GO:0071310", "def": "\"Any process that results in a change in state or activity of a cell (in terms of movement, secretion, enzyme production, gene expression, etc.) as a result of an organic substance stimulus.\" [GOC:mah]", "name": "cellular respons…	7	7	1.18102	0.000150365	BCL2L11,BRCA1,HIF1A,PTEN,STAT3,TP53,VEGFA	1
cellular response to organonitrogen compound	info:{"super-categories": "['cellular response to chemical stimulus', 'cellular response to endogenous stimulus', 'response to nitrogen compound', 'response to organic substance']", "namespace": "biological_process", "id": "GO:0071417", "def": "\"Any process that results in a change in state or activity of a cell (in terms of movement, secretion, enzyme production, gene expression, etc.) as a res…	4	4	0.369658	0.000615152	BCL2L11,BRCA1,PTEN,TP53	1
cellular response to oxygen levels	info:{"super-categories": "['cellular response to chemical stimulus', 'response to oxygen levels']", "namespace": "biological_process", "id": "GO:0071453", "def": "\"Any process that results in a change in state or activity of a cell (in terms of movement, secretion, enzyme production, gene expression, etc.) as a result of a stimulus reflecting the presence, absence, or concentration of oxygen.\"…	5	5	0.116644	5.33672e-07	HIF1A,MYC,PTEN,TP53,VEGFA	1
cellular response to peptide	info:{"super-categories": "['cellular response to chemical stimulus', 'cellular response to endogenous stimulus', 'response to nitrogen compound', 'response to organic substance', 'response to oxygen-containing compound']", "namespace": "biological_process", "id": "GO:1901653", "def": "\"Any process that results in a change in state or activity of a cell (in terms of movement, secretion, enzyme p…	3	3	0.194692	0.00117552	BCL2L11,PTEN,TP53	1
cellular response to radiation	info:{"super-categories": "['cellular response to abiotic stimulus', 'cellular response to environmental stimulus', 'response to radiation']", "namespace": "biological_process", "id": "GO:0071478", "def": "\"Any process that results in a change in state or activity of a cell (in terms of movement, secretion, enzyme production, gene expression, etc.) as a result of an electromagnetic radiation sti…	3	3	0.141517	0.000532222	CDKN1A,MYC,TP53	1
cellular senescence	info:{"super-categories": "['cell aging', 'cellular response to stress']", "namespace": "biological_process", "id": "GO:0090398", "def": "\"A cell aging process stimulated in response to cellular stress, whereby normal cells lose the ability to divide through irreversible cell cycle arrest.\" [GOC:BHF]", "name": "cellular senescence"}	3	3	0.0274456	8.62259e-06	CDKN1A,HMGA2,TP53	1
chemical homeostasis	info:{"super-categories": "['homeostatic process']", "namespace": "biological_process", "id": "GO:0048878", "def": "\"Any biological process involved in the maintenance of an internal steady state of a chemical.\" [GOC:isa_complete]", "name": "chemical homeostasis"}	6	6	0.929721	0.000318607	HIF1A,MYC,STAT3,TP53,VEGFA,XIAP	1
chordate embryonic development	info:{"super-categories": "['embryo development', 'multicellular organism development']", "namespace": "biological_process", "id": "GO:0043009", "def": "\"The process whose specific outcome is the progression of the embryo over time, from zygote formation through a stage including a notochord and neural tube until birth or egg hatching.\" [GOC:mtg_sensu]", "name": "chordate embryonic development"}	4	4	0.173251	5.12835e-05	BCL2L11,BRCA1,TP53,VEGFA	1
chromatin organization	info:{"super-categories": "[]", "namespace": "biological_process", "id": "GO:0006325", "def": "\"Any process that results in the specification, formation or maintenance of the physical structure of eukaryotic chromatin.\" [GOC:mah, GOC:vw, PMID:20404130]", "name": "chromatin organization"}	4	4	0.575501	0.00261044	HMGA2,MYC,RB1,TP53	1
chromatin remodeling	info:{"super-categories": "['chromatin organization']", "namespace": "biological_process", "id": "GO:0006338", "def": "\"Dynamic structural changes to eukaryotic chromatin occurring throughout the cell division cycle. These changes range from the local changes necessary for transcriptional regulation to global changes necessary for chromosome segregation.\" [GOC:jid, GOC:vw, PMID:12697820]", "nam…	3	3	0.13294	0.000451287	HMGA2,MYC,RB1	1
chromosome organization	info:{"super-categories": "['organelle organization']", "namespace": "biological_process", "id": "GO:0051276", "def": "\"A process that is carried out at the cellular level that results in the assembly, arrangement of constituent parts, or disassembly of chromosomes, structures composed of a very long molecule of DNA and associated proteins that carries hereditary information. This term covers co…	3	3	0.337924	0.00494618	HMGA2,MYC,TP53	1
cytokine-mediated signaling pathway	info:{"super-categories": "['cell surface receptor signaling pathway', 'regulation of cellular process']", "namespace": "biological_process", "id": "GO:0019221", "def": "\"A series of molecular signals initiated by the binding of a cytokine to a receptor on the surface of a cell, and ending with regulation of a downstream cellular process, e.g. transcription.\" [GOC:mah, GOC:signaling, PMID:19295…	7	7	0.559205	2.64481e-06	CCND1,CDKN1A,HIF1A,MYC,STAT3,TP53,VEGFA	1
developmental growth	info:{"super-categories": "[]", "namespace": "biological_process", "id": "GO:0048589", "def": "\"The increase in size or mass of an entire organism, a part of an organism or a cell, where the increase in size or mass has the specific outcome of the progression of the organism over time from one condition to another.\" [GOC:go_curators]", "name": "developmental growth"}	3	3	0.258161	0.002441	CDKN1A,PTEN,TP53	1
developmental maturation	info:{"super-categories": "[]", "namespace": "biological_process", "id": "GO:0021700", "def": "\"A developmental process, independent of morphogenetic (shape) change, that is required for an anatomical structure, cell or cellular component to attain its fully functional state.\" [GO_REF:0000021, GOC:cls, GOC:dgh, GOC:dph, GOC:jid, GOC:mtg_15jun06]", "name": "developmental maturation"}	5	5	0.163816	2.09811e-06	CDKN1A,HIF1A,PTEN,RB1,VEGFA	1
developmental process	info:{"super-categories": "[]", "namespace": "biological_process", "id": "GO:0032502", "def": "\"A biological process whose specific outcome is the progression of an integrated living unit: an anatomical structure (which may be a subcellular structure, cell, tissue, or organ), or organism over time from an initial condition to a later condition.\" [GOC:isa_complete]", "name": "developmental proce…	14	14	4.28667	4.901e-06	BCL2L11,BRCA1,CCND1,CDKN1A,CYLD,HIF1A,HMGA2,MYC,PTEN,RB1,STAT3,TP53,VEGFA,WEE1	1
developmental process involved in reproduction	info:{"super-categories": "[]", "namespace": "biological_process", "id": "GO:0003006", "def": "\"A developmental process in which a progressive change in the state of some part of an organism specifically contributes to its ability to form offspring.\" [GOC:dph, GOC:isa_complete]", "name": "developmental process involved in reproduction"}	5	5	0.777055	0.00103866	BCL2L11,CCND1,HIF1A,PTEN,VEGFA	1
embryo development	info:{"super-categories": "['multicellular organism development']", "namespace": "biological_process", "id": "GO:0009790", "def": "\"The process whose specific outcome is the progression of an embryo from its formation until the end of its embryonic life stage. The end of the embryonic stage is organism-specific. For example, for mammals, the process would begin with zygote formation and end with…	4	4	0.192977	7.22118e-05	BCL2L11,BRCA1,TP53,VEGFA	1
embryo development ending in birth or egg hatching	info:{"super-categories": "['embryo development', 'multicellular organism development']", "namespace": "biological_process", "id": "GO:0009792", "def": "\"The process whose specific outcome is the progression of an embryo over time, from zygote formation until the end of the embryonic life stage. The end of the embryonic life stage is organism-specific and may be somewhat arbitrary; for mammals i…	4	4	0.187831	6.56425e-05	BCL2L11,BRCA1,TP53,VEGFA	1
enzyme linked receptor protein signaling pathway	info:{"super-categories": "['cell surface receptor signaling pathway', 'regulation of cellular process']", "namespace": "biological_process", "id": "GO:0007167", "def": "\"Any series of molecular signals initiated by the binding of an extracellular ligand to a receptor on the surface of the target cell, where the receptor possesses catalytic activity or is closely associated with an enzyme such a…	4	4	0.576358	0.00261705	PTEN,STAT3,TP53,VEGFA	1
establishment of protein localization	info:{"super-categories": "['protein localization']", "namespace": "biological_process", "id": "GO:0045184", "def": "\"The directed movement of a protein to a specific location.\" [GOC:bf]", "name": "establishment of protein localization"}	4	4	1.26078	0.0344829	BCL2L11,CDKN1A,STAT3,TP53	1
establishment of protein localization to organelle	info:{"super-categories": "['cellular macromolecule localization', 'establishment of protein localization', 'protein localization']", "namespace": "biological_process", "id": "GO:0072594", "def": "\"The directed movement of a protein to a specific location on or in an organelle. Encompasses establishment of localization in the membrane or lumen of a membrane-bounded organelle.\" [GOC:mah]", "name…	4	4	0.353363	0.000532222	BCL2L11,CDKN1A,STAT3,TP53	1
hematopoietic or lymphoid organ development	info:{"super-categories": "['animal organ development']", "namespace": "biological_process", "id": "GO:0048534", "def": "\"The process whose specific outcome is the progression of any organ involved in hematopoiesis (also known as hemopoiesis) or lymphoid cell activation over time, from its formation to the mature structure. Such development includes differentiation of resident cell types (stroma…	3	3	0.146663	0.000582385	BCL2L11,HIF1A,TP53	1
heterocycle metabolic process	info:{"super-categories": "[]", "namespace": "biological_process", "id": "GO:0046483", "def": "\"The chemical reactions and pathways involving heterocyclic compounds, those with a cyclic molecular structure and at least two different atoms in the ring (or rings).\" [CHEBI:5686, ISBN:0198506732]", "name": "heterocycle metabolic process"}	9	9	2.43237	0.000328969	BRCA1,CCND1,CDKN1A,E2F3,HIF1A,HMGA2,PTEN,STAT3,TP53	1
homeostasis of number of cells	info:{"super-categories": "['homeostatic process']", "namespace": "biological_process", "id": "GO:0048872", "def": "\"Any biological process involved in the maintenance of the steady-state number of cells within a population of cells.\" [GOC:isa_complete]", "name": "homeostasis of number of cells"}	3	3	0.0994904	0.000220663	BCL2L11,CYLD,HIF1A	1
homeostatic process	info:{"super-categories": "[]", "namespace": "biological_process", "id": "GO:0042592", "def": "\"Any biological process involved in the maintenance of an internal steady state.\" [GOC:jl, ISBN:0395825172]", "name": "homeostatic process"}	9	9	1.29166	4.60944e-06	BCL2L11,CYLD,HIF1A,MYC,RB1,STAT3,TP53,VEGFA,XIAP	1
immune system process	info:{"super-categories": "[]", "namespace": "biological_process", "id": "GO:0002376", "def": "\"Any process involved in the development or functioning of the immune system, an organismal system for calibrated responses to potential internal or invasive threats.\" [GO_REF:0000022, GOC:add, GOC:mtg_15nov05]", "name": "immune system process"}	4	4	1.81227	0.100818	BCL2L11,CYLD,HIF1A,TP53	1
import into nucleus	info:{"super-categories": "['intracellular transport', 'transport']", "namespace": "biological_process", "id": "GO:0051170", "def": "\"The directed movement of substances into the nucleus.\" [GOC:ai]", "name": "import into nucleus"}	3	3	0.0969174	0.00020956	CDKN1A,STAT3,TP53	1
in utero embryonic development	info:{"super-categories": "['embryo development', 'multicellular organism development']", "namespace": "biological_process", "id": "GO:0001701", "def": "\"The process whose specific outcome is the progression of the embryo in the uterus over time, from formation of the zygote in the oviduct, to birth. An example of this process is found in Mus musculus.\" [GOC:go_curators, GOC:mtg_sensu]", "name"…	3	3	0.171535	0.000863783	BCL2L11,TP53,VEGFA	1
intracellular protein transport	info:{"super-categories": "['establishment of protein localization', 'intracellular transport', 'protein localization', 'transport']", "namespace": "biological_process", "id": "GO:0006886", "def": "\"The directed movement of proteins in a cell, including the movement of proteins between specific compartments or structures within a cell, such as organelles of a eukaryotic cell.\" [GOC:mah]", "name…	3	3	0.747894	0.0378672	CDKN1A,STAT3,TP53	1
intracellular receptor signaling pathway	info:{"super-categories": "['regulation of cellular process']", "namespace": "biological_process", "id": "GO:0030522", "def": "\"Any series of molecular signals initiated by a ligand binding to an receptor located within a cell.\" [GOC:bf, GOC:mah]", "name": "intracellular receptor signaling pathway"}	4	4	0.138086	2.40602e-05	BRCA1,CYLD,RB1,STAT3	1
intracellular signal transduction	info:{"super-categories": "['regulation of cellular process']", "namespace": "biological_process", "id": "GO:0035556", "def": "\"The process in which a signal is passed on to downstream components within the cell, which become activated themselves to further propagate the signal and finally trigger a change in the function or state of the cell.\" [GOC:bf, GOC:jl, GOC:signaling, ISBN:3527303782]",…	8	8	1.37314	5.11935e-05	BCL2L11,BRCA1,CDKN1A,CYLD,MYC,PTEN,RB1,TP53	1
intracellular transport	info:{"super-categories": "['transport']", "namespace": "biological_process", "id": "GO:0046907", "def": "\"The directed movement of substances within a cell.\" [GOC:ai]", "name": "intracellular transport"}	4	4	1.2462	0.033301	CDKN1A,HIF1A,STAT3,TP53	1
intrinsic apoptotic signaling pathway	info:{"super-categories": "['apoptotic signaling pathway', 'intracellular signal transduction', 'regulation of cellular process']", "namespace": "biological_process", "id": "GO:0097193", "def": "\"A series of molecular signals in which an intracellular signal is conveyed to trigger the apoptotic death of a cell. The pathway starts with reception of an intracellular signal (e.g. DNA damage, endopl…	4	4	0.123505	1.69807e-05	BCL2L11,BRCA1,CDKN1A,TP53	1
intrinsic apoptotic signaling pathway in response to DNA damage	info:{"super-categories": "['apoptotic signaling pathway', 'cellular response to stress', 'intracellular signal transduction', 'regulation of cellular process']", "namespace": "biological_process", "id": "GO:0008630", "def": "\"A series of molecular signals in which an intracellular signal is conveyed to trigger the apoptotic death of a cell. The pathway is induced by the detection of DNA damage,…	4	4	0.058322	1.44348e-06	BCL2L11,BRCA1,CDKN1A,TP53	1
ion homeostasis	info:{"super-categories": "['homeostatic process']", "namespace": "biological_process", "id": "GO:0050801", "def": "\"Any process involved in the maintenance of an internal steady state of ions within an organism or cell.\" [GOC:ai]", "name": "ion homeostasis"}	4	4	0.666414	0.00430366	HIF1A,MYC,TP53,XIAP	1
lactation	info:{"super-categories": "['regulation of body fluid levels', 'transport']", "namespace": "biological_process", "id": "GO:0007595", "def": "\"The regulated release of milk from the mammary glands and the period of time that a mother lactates to feed her young.\" [ISBN:0198506732]", "name": "lactation"}	3	3	0.0385954	1.99257e-05	CCND1,HIF1A,VEGFA	1
locomotion	info:{"super-categories": "[]", "namespace": "biological_process", "id": "GO:0040011", "def": "\"Self-propelled movement of a cell or organism from one location to another.\" [GOC:dgh]", "name": "locomotion"}	3	3	0.877403	0.05562	HIF1A,PTEN,VEGFA	1
mRNA metabolic process	info:{"super-categories": "['cellular aromatic compound metabolic process', 'cellular nitrogen compound metabolic process', 'heterocycle metabolic process', 'macromolecule metabolic process', 'nucleobase-containing compound metabolic process', 'organic cyclic compound metabolic process']", "namespace": "biological_process", "id": "GO:0016071", "def": "\"The chemical reactions and pathways involvi…	3	3	0.548913	0.017579	HIF1A,STAT3,TP53	1
mRNA transcription	info:{"super-categories": "['cellular aromatic compound metabolic process', 'cellular biosynthetic process', 'cellular macromolecule metabolic process', 'cellular nitrogen compound metabolic process', 'heterocycle metabolic process', 'macromolecule metabolic process', 'nucleobase-containing compound metabolic process', 'organic cyclic compound metabolic process', 'organic substance biosynthetic p…	3	3	0.0214419	4.70784e-06	HIF1A,STAT3,TP53	1
macromolecule localization	info:{"super-categories": "[]", "namespace": "biological_process", "id": "GO:0033036", "def": "\"Any process in which a macromolecule is transported to, or maintained in, a specific location.\" [GOC:mah]", "name": "macromolecule localization"}	5	5	1.6922	0.0230384	BCL2L11,CDKN1A,RB1,STAT3,TP53	1
macromolecule metabolic process	info:{"super-categories": "[]", "namespace": "biological_process", "id": "GO:0043170", "def": "\"The chemical reactions and pathways involving macromolecules, any molecule of high relative molecular mass, the structure of which essentially comprises the multiple repetition of units derived, actually or conceptually, from molecules of low relative molecular mass.\" [CHEBI:33694, GOC:mah]", "name":…	14	14	5.01655	2.53649e-05	BRCA1,CCND1,CCND2,CDKN1A,CYLD,E2F3,HIF1A,HMGA2,MYC,PTEN,STAT3,TP53,WEE1,XIAP	1
membrane organization	info:{"super-categories": "[]", "namespace": "biological_process", "id": "GO:0061024", "def": "\"A process which results in the assembly, arrangement of constituent parts, or disassembly of a membrane. A membrane is a double layer of lipid molecules that encloses all cells, and, in eukaryotes, many organelles; may be a single or double lipid bilayer; also includes associated proteins.\" [GOC:dph,…	4	4	0.55749	0.00236517	BCL2L11,PTEN,STAT3,TP53	1
metabolic process	info:{"super-categories": "[]", "namespace": "biological_process", "id": "GO:0008152", "def": "\"The chemical reactions and pathways, including anabolism and catabolism, by which living organisms transform chemical substances. Metabolic processes typically transform small molecules, but also include macromolecular processes such as DNA repair and replication, and protein synthesis and degradation…	14	14	6.88971	0.000747065	BRCA1,CCND1,CCND2,CDKN1A,CYLD,E2F3,HIF1A,HMGA2,MYC,PTEN,STAT3,TP53,WEE1,XIAP	1
metal ion homeostasis	info:{"super-categories": "['homeostatic process']", "namespace": "biological_process", "id": "GO:0055065", "def": "\"Any process involved in the maintenance of an internal steady state of metal ions within an organism or cell.\" [GOC:ai, GOC:jid, GOC:mah]", "name": "metal ion homeostasis"}	3	3	0.526613	0.0159024	HIF1A,MYC,XIAP	1
microtubule-based process	info:{"super-categories": "[]", "namespace": "biological_process", "id": "GO:0007017", "def": "\"Any cellular process that depends upon or alters the microtubule cytoskeleton, that part of the cytoskeleton comprising microtubules and their associated proteins.\" [GOC:mah]", "name": "microtubule-based process"}	3	3	0.534332	0.0164901	BRCA1,HIF1A,WEE1	1
mitochondrial membrane organization	info:{"super-categories": "['membrane organization', 'organelle organization']", "namespace": "biological_process", "id": "GO:0007006", "def": "\"A process that is carried out at the cellular level which results in the assembly, arrangement of constituent parts, or disassembly of a mitochondrial membrane, either of the lipid bilayer surrounding a mitochondrion.\" [GOC:ai, GOC:dph, GOC:jl, GOC:mah…	3	3	0.10721	0.000265078	BCL2L11,STAT3,TP53	1
mitochondrion organization	info:{"super-categories": "['organelle organization']", "namespace": "biological_process", "id": "GO:0007005", "def": "\"A process that is carried out at the cellular level which results in the assembly, arrangement of constituent parts, or disassembly of a mitochondrion; includes mitochondrial morphogenesis and distribution, and replication of the mitochondrial genome as well as synthesis of new…	3	3	0.259018	0.00244974	BCL2L11,STAT3,TP53	1
mitotic DNA damage checkpoint	info:{"super-categories": "['DNA integrity checkpoint', 'cellular response to stress', 'mitotic cell cycle checkpoint', 'mitotic cell cycle process', 'negative regulation of biological process', 'regulation of cellular process']", "namespace": "biological_process", "id": "GO:0044773", "def": "\"A mitotic cell cycle checkpoint that detects and negatively regulates progression through the cell cycl…	3	3	0.0351647	1.59581e-05	CCND1,HMGA2,TP53	1
mitotic DNA integrity checkpoint	info:{"super-categories": "['DNA integrity checkpoint', 'mitotic cell cycle checkpoint', 'mitotic cell cycle process', 'negative regulation of biological process', 'regulation of cellular process']", "namespace": "biological_process", "id": "GO:0044774", "def": "\"A mitotic cell cycle process that controls cell cycle progression in response to changes in DNA structure by monitoring the integrity …	3	3	0.0428838	2.57341e-05	CCND1,HMGA2,TP53	1
mitotic cell cycle checkpoint	info:{"super-categories": "['mitotic cell cycle process', 'negative regulation of biological process', 'regulation of cellular process']", "namespace": "biological_process", "id": "GO:0007093", "def": "\"A cell cycle checkpoint that ensures accurate chromosome replication and segregation by preventing progression through a mitotic cell cycle until conditions are suitable for the cell to proceed t…	6	6	0.0866253	3.48607e-09	BRCA1,CCND1,HMGA2,RB1,TP53,WEE1	1
mitotic cell cycle phase transition	info:{"super-categories": "['cell cycle phase transition', 'mitotic cell cycle process']", "namespace": "biological_process", "id": "GO:0044772", "def": "\"The cell cycle process by which a cell commits to entering the next mitotic cell cycle phase.\" [GOC:mtg_cell_cycle]", "name": "mitotic cell cycle phase transition"}	6	6	0.215277	3.03119e-07	CCND1,CCND2,CDKN1A,MYC,RB1,WEE1	1
morphogenesis of an epithelium	info:{"super-categories": "['tissue morphogenesis']", "namespace": "biological_process", "id": "GO:0002009", "def": "\"The process in which the anatomical structures of epithelia are generated and organized. An epithelium consists of closely packed cells arranged in one or more layers, that covers the outer surfaces of the body or lines any internal cavity or tube.\" [GOC:dph, GOC:jl, GOC:tb, ISB…	3	3	0.247011	0.00217123	HIF1A,MYC,VEGFA	1
multicellular organism development	info:{"super-categories": "[]", "namespace": "biological_process", "id": "GO:0007275", "def": "\"The biological process whose specific outcome is the progression of a multicellular organism over time from an initial condition (e.g. a zygote or a young adult) to a later condition (e.g. a multicellular animal or an aged adult).\" [GOC:dph, GOC:ems, GOC:isa_complete, GOC:tb]", "name": "multicellular…	5	5	0.578074	0.000321637	BCL2L11,BRCA1,HMGA2,TP53,VEGFA	1
negative regulation of G1/S transition of mitotic cell cycle	info:{"super-categories": "['negative regulation of biological process', 'regulation of cellular process']", "namespace": "biological_process", "id": "GO:2000134", "def": "\"Any signalling pathway that decreases or inhibits the activity of a cell cycle cyclin-dependent protein kinase to modulate the switch from G1 phase to S phase of the mitotic cell cycle.\" [GOC:mtg_cell_cycle]", "name": "negat…	6	6	0.087483	3.5339e-09	CCND1,CDKN1A,PTEN,RB1,TP53,WEE1	1
negative regulation of MAPK cascade	info:{"super-categories": "['negative regulation of biological process', 'regulation of cellular process', 'regulation of metabolic process', 'regulation of response to stimulus', 'regulation of signaling']", "namespace": "biological_process", "id": "GO:0043409", "def": "\"Any process that stops, prevents, or reduces the frequency, rate or extent of signal transduction mediated by the MAPKKK casc…	3	3	0.143232	0.000547338	CYLD,MYC,PTEN	1
negative regulation of RNA biosynthetic process	info:{"super-categories": "['negative regulation of biological process', 'regulation of cellular process', 'regulation of metabolic process']", "namespace": "biological_process", "id": "GO:1902679", "def": "\"Any process that stops, prevents or reduces the frequency, rate or extent of RNA biosynthetic process.\" [GO:jl, GO_REF:0000058, GOC:TermGenie]", "name": "negative regulation of RNA biosynth…	9	9	1.05237	1.0697e-06	BRCA1,CCND1,E2F3,HMGA2,MYC,RB1,STAT3,TP53,VEGFA	1
negative regulation of apoptotic process	info:{"super-categories": "['negative regulation of biological process', 'regulation of cellular process']", "namespace": "biological_process", "id": "GO:0043066", "def": "\"Any process that stops, prevents, or reduces the frequency, rate or extent of cell death by apoptotic process.\" [GOC:jl, GOC:mtg_apoptosis]", "name": "negative regulation of apoptotic process"}	12	12	0.749609	1.73536e-11	BRCA1,CCND2,CDKN1A,HIF1A,HMGA2,MYC,PTEN,RB1,STAT3,TP53,VEGFA,XIAP	1
negative regulation of apoptotic signaling pathway	info:{"super-categories": "['negative regulation of biological process', 'regulation of cellular process', 'regulation of response to stimulus', 'regulation of signaling']", "namespace": "biological_process", "id": "GO:2001234", "def": "\"Any process that stops, prevents or reduces the frequency, rate or extent of apoptotic signaling pathway.\" [GOC:mtg_apoptosis]", "name": "negative regulation o…	3	3	0.193835	0.00116432	BRCA1,HIF1A,RB1	1
negative regulation of biosynthetic process	info:{"super-categories": "['negative regulation of biological process', 'regulation of metabolic process']", "namespace": "biological_process", "id": "GO:0009890", "def": "\"Any process that stops, prevents, or reduces the rate of the chemical reactions and pathways resulting in the formation of substances.\" [GOC:go_curators]", "name": "negative regulation of biosynthetic process"}	9	9	1.30538	4.89532e-06	BRCA1,CCND1,E2F3,HMGA2,MYC,RB1,STAT3,TP53,VEGFA	1
negative regulation of catalytic activity	info:{"super-categories": "['negative regulation of molecular function', 'regulation of catalytic activity']", "namespace": "biological_process", "id": "GO:0043086", "def": "\"Any process that stops or reduces the activity of an enzyme.\" [GOC:ebc, GOC:jl, GOC:tb, GOC:vw]", "name": "negative regulation of catalytic activity"}	6	6	0.665557	6.45932e-05	CDKN1A,PTEN,RB1,TP53,VEGFA,XIAP	1
negative regulation of cell cycle	info:{"super-categories": "['negative regulation of biological process', 'regulation of cellular process']", "namespace": "biological_process", "id": "GO:0045786", "def": "\"Any process that stops, prevents or reduces the rate or extent of progression through the cell cycle.\" [GOC:dph, GOC:go_curators, GOC:tb]", "name": "negative regulation of cell cycle"}	9	9	0.476868	3.58599e-09	BRCA1,CCND1,CDKN1A,HMGA2,MYC,PTEN,RB1,TP53,WEE1	1
negative regulation of cell cycle G1/S phase transition	info:{"super-categories": "['negative regulation of biological process', 'regulation of cellular process']", "namespace": "biological_process", "id": "GO:1902807", "def": "\"Any signalling pathway that decreases or inhibits the activity of a cell cycle cyclin-dependent protein kinase to modulate the switch from G1 phase to S phase of the cell cycle.\" [GO_REF:0000058, GOC:mtg_cell_cycle, GOC:Term…	6	6	0.090056	3.83068e-09	CCND1,CDKN1A,PTEN,RB1,TP53,WEE1	1
negative regulation of cell cycle process	info:{"super-categories": "['negative regulation of biological process', 'regulation of cellular process']", "namespace": "biological_process", "id": "GO:0010948", "def": "\"Any process that decreases the rate, frequency or extent of a cellular process that is involved in the progression of biochemical and morphological phases and events that occur in a cell during successive cell replication or …	8	8	0.270168	2.05355e-09	BRCA1,CCND1,CDKN1A,HMGA2,PTEN,RB1,TP53,WEE1	1
negative regulation of cell death	info:{"super-categories": "['negative regulation of biological process', 'regulation of cellular process']", "namespace": "biological_process", "id": "GO:0060548", "def": "\"Any process that decreases the rate or frequency of cell death. Cell death is the specific activation or halting of processes within a cell so that its vital functions markedly cease, rather than simply deteriorating graduall…	12	12	0.834519	4.64068e-11	BRCA1,CCND2,CDKN1A,HIF1A,HMGA2,MYC,PTEN,RB1,STAT3,TP53,VEGFA,XIAP	1
negative regulation of cell development	info:{"super-categories": "['negative regulation of biological process', 'regulation of cellular process', 'regulation of developmental process']", "namespace": "biological_process", "id": "GO:0010721", "def": "\"Any process that decreases the rate, frequency or extent of the progression of the cell over time, from its formation to the mature structure. Cell development does not include the steps…	4	4	0.277887	0.00024447	PTEN,STAT3,TP53,VEGFA	1
negative regulation of cell differentiation	info:{"super-categories": "['negative regulation of biological process', 'regulation of cellular process', 'regulation of developmental process']", "namespace": "biological_process", "id": "GO:0045596", "def": "\"Any process that stops, prevents, or reduces the frequency, rate or extent of cell differentiation.\" [GOC:go_curators]", "name": "negative regulation of cell differentiation"}	7	7	0.595227	3.83569e-06	CCND1,MYC,PTEN,RB1,STAT3,TP53,VEGFA	1
negative regulation of cell population proliferation	info:{"super-categories": "['negative regulation of biological process', 'regulation of cellular process']", "namespace": "biological_process", "id": "GO:0008285", "def": "\"Any process that stops, prevents or reduces the rate or extent of cell proliferation.\" [GOC:go_curators]", "name": "negative regulation of cell population proliferation"}	7	7	0.575501	3.12321e-06	CDKN1A,E2F3,MYC,PTEN,RB1,STAT3,TP53	1
negative regulation of cellular metabolic process	info:{"super-categories": "['negative regulation of biological process', 'regulation of cellular process', 'regulation of metabolic process']", "namespace": "biological_process", "id": "GO:0031324", "def": "\"Any process that stops, prevents, or reduces the frequency, rate or extent of the chemical reactions and pathways by which individual cells transform chemical substances.\" [GOC:mah]", "name…	14	14	2.13904	2.58328e-09	BRCA1,CCND1,CDKN1A,CYLD,E2F3,HIF1A,HMGA2,MYC,PTEN,RB1,STAT3,TP53,VEGFA,XIAP	1
negative regulation of cellular protein metabolic process	info:{"super-categories": "['negative regulation of biological process', 'regulation of cellular process', 'regulation of metabolic process']", "namespace": "biological_process", "id": "GO:0032269", "def": "\"Any process that stops, prevents, or reduces the frequency, rate or extent of the chemical reactions and pathways involving a protein, occurring at the level of an individual cell.\" [GOC:ma…	10	10	0.866253	1.80842e-08	BRCA1,CDKN1A,CYLD,MYC,PTEN,RB1,STAT3,TP53,VEGFA,XIAP	1
negative regulation of gene expression	info:{"super-categories": "['negative regulation of biological process', 'regulation of metabolic process']", "namespace": "biological_process", "id": "GO:0010629", "def": "\"Any process that decreases the frequency, rate or extent of gene expression. Gene expression is the process in which a gene's coding sequence is converted into a mature gene product or products (proteins or RNA). This includ…	12	12	1.43146	7.01471e-09	BRCA1,CCND1,CDKN1A,E2F3,HIF1A,HMGA2,MYC,RB1,STAT3,TP53,VEGFA,XIAP	1
negative regulation of growth	info:{"super-categories": "['negative regulation of biological process', 'regulation of growth']", "namespace": "biological_process", "id": "GO:0045926", "def": "\"Any process that stops, prevents or reduces the rate or extent of growth, the increase in size or mass of all or part of an organism.\" [GOC:go_curators]", "name": "negative regulation of growth"}	4	4	0.203269	8.49678e-05	CDKN1A,HIF1A,PTEN,TP53	1
negative regulation of hydrolase activity	info:{"super-categories": "['negative regulation of molecular function', 'regulation of catalytic activity']", "namespace": "biological_process", "id": "GO:0051346", "def": "\"Any process that stops or reduces the rate of hydrolase activity, the catalysis of the hydrolysis of various bonds.\" [GOC:ai]", "name": "negative regulation of hydrolase activity"}	3	3	0.378235	0.0067142	TP53,VEGFA,XIAP	1
negative regulation of intracellular signal transduction	info:{"super-categories": "['negative regulation of biological process', 'regulation of cellular process', 'regulation of response to stimulus', 'regulation of signaling']", "namespace": "biological_process", "id": "GO:1902532", "def": "\"Any process that stops, prevents or reduces the frequency, rate or extent of intracellular signal transduction.\" [GOC:dph, GOC:signaling, GOC:tb, GOC:TermGenie…	4	4	0.423692	0.000966515	CYLD,HIF1A,MYC,PTEN	1
negative regulation of kinase activity	info:{"super-categories": "['negative regulation of biological process', 'negative regulation of molecular function', 'regulation of catalytic activity', 'regulation of cellular process', 'regulation of metabolic process']", "namespace": "biological_process", "id": "GO:0033673", "def": "\"Any process that stops, prevents, or reduces the frequency, rate or extent of kinase activity, the catalysis …	3	3	0.2067	0.0013711	CDKN1A,PTEN,RB1	1
negative regulation of mitotic cell cycle	info:{"super-categories": "['negative regulation of biological process', 'regulation of cellular process']", "namespace": "biological_process", "id": "GO:0045930", "def": "\"Any process that stops, prevents or reduces the rate or extent of progression through the mitotic cell cycle.\" [GOC:dph, GOC:go_curators, GOC:tb]", "name": "negative regulation of mitotic cell cycle"}	8	8	0.258161	1.5249e-09	BRCA1,CCND1,CDKN1A,HMGA2,PTEN,RB1,TP53,WEE1	1
negative regulation of mitotic cell cycle phase transition	info:{"super-categories": "['negative regulation of biological process', 'regulation of cellular process']", "namespace": "biological_process", "id": "GO:1901991", "def": "\"Any process that stops, prevents or reduces the frequency, rate or extent of mitotic cell cycle phase transition.\" [GOC:mtg_cell_cycle, GOC:TermGenie, PMID:22841721]", "name": "negative regulation of mitotic cell cycle phase…	8	8	0.180112	1.42091e-10	BRCA1,CCND1,CDKN1A,HMGA2,PTEN,RB1,TP53,WEE1	1
negative regulation of neurogenesis	info:{"super-categories": "['negative regulation of biological process', 'regulation of cellular process', 'regulation of developmental process', 'regulation of multicellular organismal process']", "namespace": "biological_process", "id": "GO:0050768", "def": "\"Any process that stops, prevents, or reduces the frequency, rate or extent of neurogenesis, the generation of cells within the nervous s…	3	3	0.241865	0.00205662	PTEN,STAT3,TP53	1
negative regulation of nucleic acid-templated transcription	info:{"super-categories": "['negative regulation of biological process', 'regulation of cellular process', 'regulation of metabolic process']", "namespace": "biological_process", "id": "GO:1903507", "def": "\"Any process that stops, prevents or reduces the frequency, rate or extent of nucleic acid-templated transcription.\" [GO_REF:0000058, GOC:pr, GOC:TermGenie, GOC:txnOH, GOC:vw]", "name": "neg…	9	9	1.05065	1.06874e-06	BRCA1,CCND1,E2F3,HMGA2,MYC,RB1,STAT3,TP53,VEGFA	1
negative regulation of phosphorylation	info:{"super-categories": "['negative regulation of biological process', 'regulation of cellular process', 'regulation of metabolic process']", "namespace": "biological_process", "id": "GO:0042326", "def": "\"Any process that stops, prevents or decreases the rate of addition of phosphate groups to a molecule.\" [GOC:jl]", "name": "negative regulation of phosphorylation"}	6	6	0.372231	4.41312e-06	CDKN1A,CYLD,MYC,PTEN,RB1,STAT3	1
negative regulation of programmed cell death	info:{"super-categories": "['negative regulation of biological process', 'regulation of cellular process']", "namespace": "biological_process", "id": "GO:0043069", "def": "\"Any process that stops, prevents, or reduces the frequency, rate or extent of programmed cell death, cell death resulting from activation of endogenous cellular processes.\" [GOC:jl]", "name": "negative regulation of programm…	12	12	0.762474	1.82014e-11	BRCA1,CCND2,CDKN1A,HIF1A,HMGA2,MYC,PTEN,RB1,STAT3,TP53,VEGFA,XIAP	1
negative regulation of protein kinase activity	info:{"super-categories": "['negative regulation of biological process', 'negative regulation of molecular function', 'regulation of catalytic activity', 'regulation of cellular process', 'regulation of metabolic process']", "namespace": "biological_process", "id": "GO:0006469", "def": "\"Any process that stops, prevents, or reduces the frequency, rate or extent of protein kinase activity.\" [GOC…	3	3	0.190404	0.0011164	CDKN1A,PTEN,RB1	1
negative regulation of protein metabolic process	info:{"super-categories": "['negative regulation of biological process', 'regulation of metabolic process']", "namespace": "biological_process", "id": "GO:0051248", "def": "\"Any process that stops, prevents, or reduces the frequency, rate or extent of chemical reactions and pathways involving a protein.\" [GOC:ai]", "name": "negative regulation of protein metabolic process"}	10	10	0.92286	2.93279e-08	BRCA1,CDKN1A,CYLD,MYC,PTEN,RB1,STAT3,TP53,VEGFA,XIAP	1
negative regulation of protein phosphorylation	info:{"super-categories": "['negative regulation of biological process', 'regulation of cellular process', 'regulation of metabolic process']", "namespace": "biological_process", "id": "GO:0001933", "def": "\"Any process that stops, prevents or reduces the rate of addition of phosphate groups to amino acids within a protein.\" [GOC:hjd]", "name": "negative regulation of protein phosphorylation"}	5	5	0.340497	3.83304e-05	CDKN1A,CYLD,MYC,PTEN,RB1	1
negative regulation of protein serine/threonine kinase activity	info:{"super-categories": "['negative regulation of biological process', 'negative regulation of molecular function', 'regulation of catalytic activity', 'regulation of cellular process', 'regulation of metabolic process']", "namespace": "biological_process", "id": "GO:0071901", "def": "\"Any process that decreases the rate, frequency, or extent of protein serine/threonine kinase activity.\" [GOC…	3	3	0.113213	0.000306333	CDKN1A,PTEN,RB1	1
negative regulation of proteolysis	info:{"super-categories": "['negative regulation of biological process', 'regulation of cellular process', 'regulation of metabolic process']", "namespace": "biological_process", "id": "GO:0045861", "def": "\"Any process that stops, prevents, or reduces the frequency, rate or extent of the hydrolysis of a peptide bond or bonds within a protein.\" [GOC:go_curators]", "name": "negative regulation o…	3	3	0.293325	0.00340718	TP53,VEGFA,XIAP	1
negative regulation of reactive oxygen species metabolic process	info:{"super-categories": "['negative regulation of biological process', 'regulation of cellular process', 'regulation of metabolic process']", "namespace": "biological_process", "id": "GO:2000378", "def": "\"Any process that stops, prevents or reduces the frequency, rate or extent of reactive oxygen species metabolic process.\" [GOC:mah]", "name": "negative regulation of reactive oxygen species …	4	4	0.0480299	7.99647e-07	BRCA1,HIF1A,STAT3,TP53	1
negative regulation of signal transduction	info:{"super-categories": "['negative regulation of biological process', 'regulation of cellular process', 'regulation of response to stimulus', 'regulation of signaling']", "namespace": "biological_process", "id": "GO:0009968", "def": "\"Any process that stops, prevents, or reduces the frequency, rate or extent of signal transduction.\" [GOC:sm]", "name": "negative regulation of signal transduct…	7	7	1.05065	7.80958e-05	BRCA1,CYLD,HIF1A,MYC,PTEN,RB1,TP53	1
negative regulation of signaling	info:{"super-categories": "['negative regulation of biological process', 'regulation of signaling']", "namespace": "biological_process", "id": "GO:0023057", "def": "\"Any process that stops, prevents, or reduces the frequency, rate or extent of a signaling process.\" [GOC:mtg_signal]", "name": "negative regulation of signaling"}	7	7	1.13642	0.000120847	BRCA1,CYLD,HIF1A,MYC,PTEN,RB1,TP53	1
negative regulation of smooth muscle cell proliferation	info:{"super-categories": "['negative regulation of biological process', 'regulation of cellular process']", "namespace": "biological_process", "id": "GO:0048662", "def": "\"Any process that stops, prevents or reduces the rate or extent of smooth muscle cell proliferation.\" [CL:0000192, GOC:ebc]", "name": "negative regulation of smooth muscle cell proliferation"}	3	3	0.0394531	2.08869e-05	CDKN1A,PTEN,TP53	1
negative regulation of transcription by RNA polymerase II	info:{"super-categories": "['negative regulation of biological process', 'regulation of cellular process', 'regulation of metabolic process']", "namespace": "biological_process", "id": "GO:0000122", "def": "\"Any process that stops, prevents, or reduces the frequency, rate or extent of transcription mediated by RNA polymerase II.\" [GOC:go_curators, GOC:txnOH]", "name": "negative regulation of tr…	8	8	0.736744	1.08898e-06	CCND1,E2F3,HMGA2,MYC,RB1,STAT3,TP53,VEGFA	1
negative regulation of transcription, DNA-templated	info:{"super-categories": "['negative regulation of biological process', 'regulation of cellular process', 'regulation of metabolic process']", "namespace": "biological_process", "id": "GO:0045892", "def": "\"Any process that stops, prevents, or reduces the frequency, rate or extent of cellular DNA-templated transcription.\" [GOC:go_curators, GOC:txnOH]", "name": "negative regulation of transcrip…	9	9	1.00863	8.29635e-07	BRCA1,CCND1,E2F3,HMGA2,MYC,RB1,STAT3,TP53,VEGFA	1
neuron apoptotic process	info:{"super-categories": "['neuron death', 'programmed cell death']", "namespace": "biological_process", "id": "GO:0051402", "def": "\"Any apoptotic process in a neuron, the basic cellular unit of nervous tissue. Each neuron consists of a body, an axon, and dendrites. Their purpose is to receive, conduct, and transmit impulses in the nervous system.\" [CL:0000540, GOC:mtg_apoptosis, MeSH:A.08.66…	3	3	0.0377378	1.88587e-05	RB1,TP53,XIAP	1
neuron death	info:{"super-categories": "[]", "namespace": "biological_process", "id": "GO:0070997", "def": "\"The process of cell death in a neuron.\" [GOC:BHF, GOC:mah]", "name": "neuron death"}	3	3	0.0454568	3.01434e-05	RB1,TP53,XIAP	1
neuron differentiation	info:{"super-categories": "['cell differentiation']", "namespace": "biological_process", "id": "GO:0030182", "def": "\"The process in which a relatively unspecialized cell acquires specialized features of a neuron.\" [GOC:mah]", "name": "neuron differentiation"}	4	4	0.210988	9.58913e-05	HIF1A,RB1,STAT3,VEGFA	1
nitrogen compound metabolic process	info:{"super-categories": "[]", "namespace": "biological_process", "id": "GO:0006807", "def": "\"The chemical reactions and pathways involving organic or inorganic compounds that contain nitrogen.\" [CHEBI:51143, GOC:go_curators, GOC:jl, ISBN:0198506732]", "name": "nitrogen compound metabolic process"}	14	14	5.6701	9.25704e-05	BRCA1,CCND1,CCND2,CDKN1A,CYLD,E2F3,HIF1A,HMGA2,MYC,PTEN,STAT3,TP53,WEE1,XIAP	1
nuclear transport	info:{"super-categories": "['intracellular transport', 'transport']", "namespace": "biological_process", "id": "GO:0051169", "def": "\"The directed movement of substances into, out of, or within the nucleus.\" [GOC:ai]", "name": "nuclear transport"}	3	3	0.222996	0.00165911	CDKN1A,STAT3,TP53	1
nucleobase-containing compound metabolic process	info:{"super-categories": "['cellular aromatic compound metabolic process', 'cellular nitrogen compound metabolic process', 'heterocycle metabolic process', 'organic cyclic compound metabolic process']", "namespace": "biological_process", "id": "GO:0006139", "def": "\"Any cellular metabolic process involving nucleobases, nucleosides, nucleotides and nucleic acids.\" [GOC:ai]", "name": "nucleobase…	9	9	2.28056	0.000216932	BRCA1,CCND1,CDKN1A,E2F3,HIF1A,HMGA2,PTEN,STAT3,TP53	1
nucleocytoplasmic transport	info:{"super-categories": "['intracellular transport', 'transport']", "namespace": "biological_process", "id": "GO:0006913", "def": "\"The directed movement of molecules between the nucleus and the cytoplasm.\" [GOC:go_curators]", "name": "nucleocytoplasmic transport"}	3	3	0.220423	0.00161452	CDKN1A,STAT3,TP53	1
organelle organization	info:{"super-categories": "[]", "namespace": "biological_process", "id": "GO:0006996", "def": "\"A process that is carried out at the cellular level which results in the assembly, arrangement of constituent parts, or disassembly of an organelle within a cell. An organelle is an organized structure of distinctive morphology and function. Includes the nucleus, mitochondria, plastids, vacuoles, vesi…	7	7	1.99152	0.00243929	BCL2L11,HMGA2,MYC,PTEN,STAT3,TP53,WEE1	1
organic substance transport	info:{"super-categories": "['transport']", "namespace": "biological_process", "id": "GO:0071702", "def": "\"The directed movement of organic substances into, out of or within a cell, or between cells, or within a multicellular organism by means of some agent such as a transporter or pore. An organic substance is a molecular entity that contains carbon.\" [CHEBI:50860, GOC:mah]", "name": "organic …	3	3	1.83886	0.276899	CDKN1A,STAT3,TP53	1
peptide transport	info:{"super-categories": "['transport']", "namespace": "biological_process", "id": "GO:0015833", "def": "\"The directed movement of peptides, compounds of two or more amino acids where the alpha carboxyl group of one is bound to the alpha amino group of another, into, out of or within a cell, or between cells, by means of some agent such as a transporter or pore.\" [GOC:ai]", "name": "peptide tr…	3	3	1.21275	0.117448	CDKN1A,STAT3,TP53	1
phosphate-containing compound metabolic process	info:{"super-categories": "['phosphorus metabolic process']", "namespace": "biological_process", "id": "GO:0006796", "def": "\"The chemical reactions and pathways involving the phosphate group, the anion or salt of any phosphoric acid.\" [GOC:ai]", "name": "phosphate-containing compound metabolic process"}	7	7	1.69391	0.00103666	CCND1,CCND2,HMGA2,MYC,PTEN,STAT3,WEE1	1
phosphorylation	info:{"super-categories": "['phosphorus metabolic process']", "namespace": "biological_process", "id": "GO:0016310", "def": "\"The process of introducing a phosphate group into a molecule, usually with the formation of a phosphoric ester, a phosphoric anhydride or a phosphoric amide.\" [ISBN:0198506732]", "name": "phosphorylation"}	6	6	0.987185	0.000417058	CCND1,CCND2,HMGA2,MYC,STAT3,WEE1	1
positive regulation of DNA-binding transcription factor activity	info:{"super-categories": "['positive regulation of biological process', 'positive regulation of molecular function', 'regulation of DNA-binding transcription factor activity', 'regulation of cellular process', 'regulation of metabolic process']", "namespace": "biological_process", "id": "GO:0051091", "def": "\"Any process that activates or increases the frequency, rate or extent of activity of a…	3	3	0.22128	0.00162765	PTEN,STAT3,VEGFA	1
positive regulation of RNA biosynthetic process	info:{"super-categories": "['positive regulation of biological process', 'regulation of cellular process', 'regulation of metabolic process']", "namespace": "biological_process", "id": "GO:1902680", "def": "\"Any process that activates or increases the frequency, rate or extent of RNA biosynthetic process.\" [GO:jl, GO_REF:0000058, GOC:TermGenie]", "name": "positive regulation of RNA biosynthetic…	9	9	1.38429	7.32359e-06	BRCA1,E2F3,HIF1A,HMGA2,MYC,RB1,STAT3,TP53,VEGFA	1
positive regulation of angiogenesis	info:{"super-categories": "['positive regulation of biological process', 'regulation of developmental process', 'regulation of multicellular organismal process']", "namespace": "biological_process", "id": "GO:0045766", "def": "\"Any process that activates or increases angiogenesis.\" [GOC:go_curators]", "name": "positive regulation of angiogenesis"}	5	5	0.141517	1.11701e-06	BRCA1,HIF1A,HMGA2,STAT3,VEGFA	1
positive regulation of apoptotic process	info:{"super-categories": "['positive regulation of biological process', 'regulation of cellular process']", "namespace": "biological_process", "id": "GO:0043065", "def": "\"Any process that activates or increases the frequency, rate or extent of cell death by apoptotic process.\" [GOC:jl, GOC:mtg_apoptosis]", "name": "positive regulation of apoptotic process"}	7	7	0.544624	2.30095e-06	BCL2L11,CYLD,E2F3,HMGA2,MYC,PTEN,TP53	1
positive regulation of apoptotic signaling pathway	info:{"super-categories": "['positive regulation of biological process', 'regulation of cellular process', 'regulation of response to stimulus', 'regulation of signaling']", "namespace": "biological_process", "id": "GO:2001235", "def": "\"Any process that activates or increases the frequency, rate or extent of apoptotic signaling pathway.\" [GOC:mtg_apoptosis]", "name": "positive regulation of ap…	4	4	0.149236	3.1297e-05	BCL2L11,CYLD,PTEN,TP53	1
positive regulation of catalytic activity	info:{"super-categories": "['positive regulation of molecular function', 'regulation of catalytic activity']", "namespace": "biological_process", "id": "GO:0043085", "def": "\"Any process that activates or increases the activity of an enzyme.\" [GOC:ebc, GOC:jl, GOC:tb, GOC:vw]", "name": "positive regulation of catalytic activity"}	10	10	1.20418	2.77553e-07	BCL2L11,CCND1,CCND2,CDKN1A,HIF1A,HMGA2,MYC,PTEN,STAT3,VEGFA	1
positive regulation of cell cycle	info:{"super-categories": "['positive regulation of biological process', 'regulation of cellular process']", "namespace": "biological_process", "id": "GO:0045787", "def": "\"Any process that activates or increases the rate or extent of progression through the cell cycle.\" [GOC:go_curators]", "name": "positive regulation of cell cycle"}	8	8	0.318198	4.46403e-09	BCL2L11,BRCA1,CCND1,CCND2,CDKN1A,HMGA2,RB1,TP53	1
positive regulation of cell cycle arrest	info:{"super-categories": "['positive regulation of biological process', 'regulation of cellular process']", "namespace": "biological_process", "id": "GO:0071158", "def": "\"Any process that increases the rate, frequency, or extent of cell cycle arrest, the process in which the cell cycle is halted during one of the normal phases.\" [GOC:mah]", "name": "positive regulation of cell cycle arrest"}	4	4	0.0677564	2.46929e-06	BRCA1,CDKN1A,HMGA2,TP53	1
positive regulation of cell cycle phase transition	info:{"super-categories": "['positive regulation of biological process', 'regulation of cellular process']", "namespace": "biological_process", "id": "GO:1901989", "def": "\"Any process that activates or increases the frequency, rate or extent of cell cycle phase transition.\" [GOC:mtg_cell_cycle, GOC:TermGenie, PMID:22841721]", "name": "positive regulation of cell cycle phase transition"}	3	3	0.0789062	0.000120847	CCND1,CCND2,RB1	1
positive regulation of cell cycle process	info:{"super-categories": "['positive regulation of biological process', 'regulation of cellular process']", "namespace": "biological_process", "id": "GO:0090068", "def": "\"Any process that increases the rate, frequency or extent of a cellular process that is involved in the progression of biochemical and morphological phases and events that occur in a cell during successive cell replication or …	7	7	0.240149	1.99405e-08	BRCA1,CCND1,CCND2,CDKN1A,HMGA2,RB1,TP53	1
positive regulation of cell death	info:{"super-categories": "['positive regulation of biological process', 'regulation of cellular process']", "namespace": "biological_process", "id": "GO:0010942", "def": "\"Any process that increases the rate or frequency of cell death. Cell death is the specific activation or halting of processes within a cell so that its vital functions markedly cease, rather than simply deteriorating graduall…	8	8	0.589224	2.75433e-07	BCL2L11,CDKN1A,CYLD,E2F3,HMGA2,MYC,PTEN,TP53	1
positive regulation of cell development	info:{"super-categories": "['positive regulation of biological process', 'regulation of cellular process', 'regulation of developmental process']", "namespace": "biological_process", "id": "GO:0010720", "def": "\"Any process that increases the rate, frequency or extent of the progression of the cell over time, from its formation to the mature structure. Cell development does not include the steps…	3	3	0.464003	0.0113607	HIF1A,PTEN,VEGFA	1
positive regulation of cell differentiation	info:{"super-categories": "['positive regulation of biological process', 'regulation of cellular process', 'regulation of developmental process']", "namespace": "biological_process", "id": "GO:0045597", "def": "\"Any process that activates or increases the frequency, rate or extent of cell differentiation.\" [GOC:go_curators]", "name": "positive regulation of cell differentiation"}	6	6	0.819081	0.000176052	CYLD,HIF1A,PTEN,RB1,STAT3,VEGFA	1
positive regulation of cell migration	info:{"super-categories": "['positive regulation of biological process', 'regulation of cellular process', 'regulation of localization', 'regulation of locomotion']", "namespace": "biological_process", "id": "GO:0030335", "def": "\"Any process that activates or increases the frequency, rate or extent of cell migration.\" [GOC:go_curators]", "name": "positive regulation of cell migration"}	4	4	0.42798	0.000997012	HIF1A,STAT3,TP53,VEGFA	1
positive regulation of cell motility	info:{"super-categories": "['positive regulation of biological process', 'regulation of cellular process', 'regulation of localization', 'regulation of locomotion']", "namespace": "biological_process", "id": "GO:2000147", "def": "\"Any process that activates or increases the frequency, rate or extent of cell motility.\" [GOC:mah]", "name": "positive regulation of cell motility"}	4	4	0.449422	0.00115473	HIF1A,STAT3,TP53,VEGFA	1
positive regulation of cell population proliferation	info:{"super-categories": "['positive regulation of biological process', 'regulation of cellular process']", "namespace": "biological_process", "id": "GO:0008284", "def": "\"Any process that activates or increases the rate or extent of cell proliferation.\" [GOC:go_curators]", "name": "positive regulation of cell population proliferation"}	10	10	0.771909	7.01471e-09	CCND1,CCND2,CDKN1A,E2F3,HIF1A,HMGA2,MYC,PTEN,STAT3,VEGFA	1
positive regulation of cellular biosynthetic process	info:{"super-categories": "['positive regulation of biological process', 'regulation of cellular process', 'regulation of metabolic process']", "namespace": "biological_process", "id": "GO:0031328", "def": "\"Any process that activates or increases the frequency, rate or extent of the chemical reactions and pathways resulting in the formation of substances, carried out by individual cells.\" [GOC…	9	9	1.67933	2.61113e-05	BRCA1,E2F3,HIF1A,HMGA2,MYC,RB1,STAT3,TP53,VEGFA	1
positive regulation of cellular component biogenesis	info:{"super-categories": "['positive regulation of biological process', 'regulation of cellular component biogenesis']", "namespace": "biological_process", "id": "GO:0044089", "def": "\"Any process that activates or increases the frequency, rate or extent of cellular component biogenesis, a process that results in the biosynthesis of constituent macromolecules, assembly, and arrangement of const…	3	3	0.4357	0.00972471	BCL2L11,TP53,VEGFA	1
positive regulation of cellular component movement	info:{"super-categories": "['positive regulation of biological process', 'regulation of cellular process', 'regulation of localization']", "namespace": "biological_process", "id": "GO:0051272", "def": "\"Any process that activates or increases the frequency, rate or extent of the movement of a cellular component.\" [GOC:ai, GOC:dph, GOC:jl]", "name": "positive regulation of cellular component mov…	4	4	0.462287	0.0012626	HIF1A,STAT3,TP53,VEGFA	1
positive regulation of cellular metabolic process	info:{"super-categories": "['positive regulation of biological process', 'regulation of cellular process', 'regulation of metabolic process']", "namespace": "biological_process", "id": "GO:0031325", "def": "\"Any process that activates or increases the frequency, rate or extent of the chemical reactions and pathways by which individual cells transform chemical substances.\" [GOC:mah]", "name": "p…	15	15	2.79688	3.42685e-09	BCL2L11,BRCA1,CCND1,CCND2,CDKN1A,E2F3,HIF1A,HMGA2,MYC,PTEN,RB1,STAT3,TP53,VEGFA,XIAP	1
positive regulation of cellular protein metabolic process	info:{"super-categories": "['positive regulation of biological process', 'regulation of cellular process', 'regulation of metabolic process']", "namespace": "biological_process", "id": "GO:0032270", "def": "\"Any process that activates or increases the frequency, rate or extent of the chemical reactions and pathways involving a protein, occurring at the level of an individual cell.\" [GOC:mah]", …	12	12	1.34912	4.02705e-09	BCL2L11,BRCA1,CCND1,CCND2,CDKN1A,HMGA2,MYC,PTEN,STAT3,TP53,VEGFA,XIAP	1
positive regulation of chromosome organization	info:{"super-categories": "['positive regulation of biological process', 'regulation of cellular process']", "namespace": "biological_process", "id": "GO:2001252", "def": "\"Any process that activates or increases the frequency, rate or extent of chromosome organization.\" [GOC:obol]", "name": "positive regulation of chromosome organization"}	4	4	0.150951	3.21513e-05	BRCA1,RB1,TP53,VEGFA	1
positive regulation of cyclin-dependent protein kinase activity	info:{"super-categories": "['positive regulation of biological process', 'positive regulation of molecular function', 'regulation of catalytic activity', 'regulation of cellular process', 'regulation of metabolic process']", "namespace": "biological_process", "id": "GO:1904031", "def": "\"Any process that activates or increases the frequency, rate or extent of cyclin-dependent protein kinase acti…	3	3	0.0283033	9.25231e-06	CCND1,CCND2,CDKN1A	1
positive regulation of cytokine production	info:{"super-categories": "['positive regulation of biological process', 'regulation of multicellular organismal process']", "namespace": "biological_process", "id": "GO:0001819", "def": "\"Any process that activates or increases the frequency, rate or extent of production of a cytokine.\" [GOC:add, ISBN:0781735149]", "name": "positive regulation of cytokine production"}	3	3	0.380808	0.00682267	BRCA1,HIF1A,STAT3	1
positive regulation of endopeptidase activity	info:{"super-categories": "['positive regulation of biological process', 'positive regulation of molecular function', 'regulation of catalytic activity', 'regulation of cellular process', 'regulation of metabolic process']", "namespace": "biological_process", "id": "GO:0010950", "def": "\"Any process that increases the frequency, rate or extent of endopeptidase activity, the endohydrolysis of pep…	3	3	0.14409	0.000554976	BCL2L11,MYC,STAT3	1
positive regulation of endothelial cell proliferation	info:{"super-categories": "['positive regulation of biological process', 'regulation of cellular process']", "namespace": "biological_process", "id": "GO:0001938", "def": "\"Any process that activates or increases the rate or extent of endothelial cell proliferation.\" [GOC:add]", "name": "positive regulation of endothelial cell proliferation"}	3	3	0.0797639	0.000122793	HIF1A,STAT3,VEGFA	1
positive regulation of epithelial cell proliferation	info:{"super-categories": "['positive regulation of biological process', 'regulation of cellular process']", "namespace": "biological_process", "id": "GO:0050679", "def": "\"Any process that activates or increases the rate or extent of epithelial cell proliferation.\" [GOC:ai]", "name": "positive regulation of epithelial cell proliferation"}	5	5	0.162101	2.0146e-06	CCND1,HIF1A,MYC,STAT3,VEGFA	1
positive regulation of gene expression	info:{"super-categories": "['positive regulation of biological process', 'regulation of metabolic process']", "namespace": "biological_process", "id": "GO:0010628", "def": "\"Any process that increases the frequency, rate or extent of gene expression. Gene expression is the process in which a gene's coding sequence is converted into a mature gene product or products (proteins or RNA). This includ…	10	10	1.68705	3.83686e-06	BRCA1,E2F3,HIF1A,HMGA2,MYC,PTEN,RB1,STAT3,TP53,VEGFA	1
positive regulation of histone modification	info:{"super-categories": "['positive regulation of biological process', 'regulation of cellular process', 'regulation of metabolic process']", "namespace": "biological_process", "id": "GO:0031058", "def": "\"Any process that activates or increases the frequency, rate or extent of the covalent alteration of a histone.\" [GOC:mah]", "name": "positive regulation of histone modification"}	3	3	0.0797639	0.000122793	BRCA1,TP53,VEGFA	1
positive regulation of hydrolase activity	info:{"super-categories": "['positive regulation of molecular function', 'regulation of catalytic activity']", "namespace": "biological_process", "id": "GO:0051345", "def": "\"Any process that activates or increases the frequency, rate or extent of hydrolase activity, the catalysis of the hydrolysis of various bonds.\" [GOC:ai]", "name": "positive regulation of hydrolase activity"}	4	4	0.644973	0.00384729	BCL2L11,MYC,STAT3,VEGFA	1
positive regulation of immune system process	info:{"super-categories": "['positive regulation of biological process', 'regulation of immune system process']", "namespace": "biological_process", "id": "GO:0002684", "def": "\"Any process that activates or increases the frequency, rate, or extent of an immune system process.\" [GOC:add]", "name": "positive regulation of immune system process"}	7	7	0.853388	2.53719e-05	CDKN1A,CYLD,HIF1A,RB1,STAT3,TP53,VEGFA	1
positive regulation of intracellular signal transduction	info:{"super-categories": "['positive regulation of biological process', 'regulation of cellular process', 'regulation of response to stimulus', 'regulation of signaling']", "namespace": "biological_process", "id": "GO:1902533", "def": "\"Any process that activates or increases the frequency, rate or extent of intracellular signal transduction.\" [GOC:BHF, GOC:dph, GOC:signaling, GOC:tb, GOC:Term…	4	4	0.854245	0.00990824	BCL2L11,PTEN,TP53,VEGFA	1
positive regulation of kinase activity	info:{"super-categories": "['positive regulation of biological process', 'positive regulation of molecular function', 'regulation of catalytic activity', 'regulation of cellular process', 'regulation of metabolic process']", "namespace": "biological_process", "id": "GO:0033674", "def": "\"Any process that activates or increases the frequency, rate or extent of kinase activity, the catalysis of th…	5	5	0.486302	0.00016206	CCND1,CCND2,CDKN1A,HMGA2,VEGFA	1
positive regulation of locomotion	info:{"super-categories": "['positive regulation of biological process', 'regulation of locomotion']", "namespace": "biological_process", "id": "GO:0040017", "def": "\"Any process that activates or increases the frequency, rate or extent of locomotion of a cell or organism.\" [GOC:go_curators]", "name": "positive regulation of locomotion"}	4	4	0.473437	0.00137104	HIF1A,STAT3,TP53,VEGFA	1
positive regulation of macromolecule biosynthetic process	info:{"super-categories": "['positive regulation of biological process', 'regulation of metabolic process']", "namespace": "biological_process", "id": "GO:0010557", "def": "\"Any process that increases the rate, frequency or extent of the chemical reactions and pathways resulting in the formation of a macromolecule, any molecule of high relative molecular mass, the structure of which essentially …	9	9	1.60471	1.93805e-05	BRCA1,E2F3,HIF1A,HMGA2,MYC,RB1,STAT3,TP53,VEGFA	1
positive regulation of metabolic process	info:{"super-categories": "['positive regulation of biological process', 'regulation of metabolic process']", "namespace": "biological_process", "id": "GO:0009893", "def": "\"Any process that activates or increases the frequency, rate or extent of the chemical reactions and pathways within a cell or an organism.\" [GOC:go_curators]", "name": "positive regulation of metabolic process"}	15	15	3.05161	7.64757e-09	BCL2L11,BRCA1,CCND1,CCND2,CDKN1A,E2F3,HIF1A,HMGA2,MYC,PTEN,RB1,STAT3,TP53,VEGFA,XIAP	1
positive regulation of mitochondrion organization	info:{"super-categories": "['positive regulation of biological process', 'regulation of cellular process']", "namespace": "biological_process", "id": "GO:0010822", "def": "\"Any process that increases the frequency, rate or extent of a process involved in the formation, arrangement of constituent parts, or disassembly of a mitochondrion.\" [GOC:dph, GOC:tb]", "name": "positive regulation of mitoc…	3	3	0.0994904	0.000220663	BCL2L11,HIF1A,TP53	1
positive regulation of mitotic cell cycle	info:{"super-categories": "['positive regulation of biological process', 'regulation of cellular process']", "namespace": "biological_process", "id": "GO:0045931", "def": "\"Any process that activates or increases the rate or extent of progression through the mitotic cell cycle.\" [GOC:dph, GOC:go_curators, GOC:tb]", "name": "positive regulation of mitotic cell cycle"}	3	3	0.128651	0.000416035	CCND1,CCND2,RB1	1
positive regulation of mitotic cell cycle phase transition	info:{"super-categories": "['positive regulation of biological process', 'regulation of cellular process']", "namespace": "biological_process", "id": "GO:1901992", "def": "\"Any process that activates or increases the frequency, rate or extent of mitotic cell cycle phase transition.\" [GOC:mtg_cell_cycle, GOC:TermGenie, PMID:22841721]", "name": "positive regulation of mitotic cell cycle phase tra…	3	3	0.0660411	7.65077e-05	CCND1,CCND2,RB1	1
positive regulation of myeloid cell differentiation	info:{"super-categories": "['positive regulation of biological process', 'regulation of cellular process', 'regulation of developmental process', 'regulation of immune system process', 'regulation of multicellular organismal process']", "namespace": "biological_process", "id": "GO:0045639", "def": "\"Any process that activates or increases the frequency, rate or extent of myeloid cell differentia…	3	3	0.0780485	0.000117844	HIF1A,RB1,STAT3	1
positive regulation of neurogenesis	info:{"super-categories": "['positive regulation of biological process', 'regulation of cellular process', 'regulation of developmental process', 'regulation of multicellular organismal process']", "namespace": "biological_process", "id": "GO:0050769", "def": "\"Any process that activates or increases the frequency, rate or extent of neurogenesis, the generation of cells within the nervous system…	3	3	0.401392	0.00784819	HIF1A,PTEN,VEGFA	1
positive regulation of nitrogen compound metabolic process	info:{"super-categories": "['positive regulation of biological process', 'regulation of metabolic process']", "namespace": "biological_process", "id": "GO:0051173", "def": "\"Any process that activates or increases the frequency, rate or extent of the chemical reactions and pathways involving nitrogen or nitrogenous compounds.\" [GOC:ai, GOC:tb]", "name": "positive regulation of nitrogen compound…	15	15	2.67938	2.13883e-09	BCL2L11,BRCA1,CCND1,CCND2,CDKN1A,E2F3,HIF1A,HMGA2,MYC,PTEN,RB1,STAT3,TP53,VEGFA,XIAP	1
positive regulation of nucleic acid-templated transcription	info:{"super-categories": "['positive regulation of biological process', 'regulation of cellular process', 'regulation of metabolic process']", "namespace": "biological_process", "id": "GO:1903508", "def": "\"Any process that activates or increases the frequency, rate or extent of nucleic acid-templated transcription.\" [GO_REF:0000058, GOC:pr, GOC:TermGenie, GOC:txnOH, GOC:vw]", "name": "positiv…	9	9	1.38343	7.32359e-06	BRCA1,E2F3,HIF1A,HMGA2,MYC,RB1,STAT3,TP53,VEGFA	1
positive regulation of organelle organization	info:{"super-categories": "['positive regulation of biological process', 'regulation of cellular process']", "namespace": "biological_process", "id": "GO:0010638", "def": "\"Any process that increases the frequency, rate or extent of a process involved in the formation, arrangement of constituent parts, or disassembly of an organelle.\" [GOC:dph, GOC:tb]", "name": "positive regulation of organell…	6	6	0.520609	2.0318e-05	BCL2L11,BRCA1,HIF1A,RB1,TP53,VEGFA	1
positive regulation of peptidase activity	info:{"super-categories": "['positive regulation of biological process', 'positive regulation of molecular function', 'regulation of catalytic activity', 'regulation of cellular process', 'regulation of metabolic process']", "namespace": "biological_process", "id": "GO:0010952", "def": "\"Any process that increases the frequency, rate or extent of peptidase activity, the hydrolysis of peptide bon…	3	3	0.161243	0.000736304	BCL2L11,MYC,STAT3	1
positive regulation of peptidyl-tyrosine phosphorylation	info:{"super-categories": "['positive regulation of biological process', 'regulation of cellular process', 'regulation of metabolic process']", "namespace": "biological_process", "id": "GO:0050731", "def": "\"Any process that activates or increases the frequency, rate or extent of the phosphorylation of peptidyl-tyrosine.\" [GOC:ai]", "name": "positive regulation of peptidyl-tyrosine phosphorylat…	3	3	0.162958	0.000754158	STAT3,TP53,VEGFA	1
positive regulation of phosphorylation	info:{"super-categories": "['positive regulation of biological process', 'regulation of cellular process', 'regulation of metabolic process']", "namespace": "biological_process", "id": "GO:0042327", "def": "\"Any process that activates or increases the frequency, rate or extent of addition of phosphate groups to a molecule.\" [GOC:jl]", "name": "positive regulation of phosphorylation"}	9	9	0.892841	3.39534e-07	CCND1,CCND2,CDKN1A,HIF1A,HMGA2,PTEN,STAT3,TP53,VEGFA	1
positive regulation of pri-miRNA transcription by RNA polymerase II	info:{"super-categories": "['positive regulation of biological process', 'regulation of cellular process', 'regulation of metabolic process']", "namespace": "biological_process", "id": "GO:1902895", "def": "\"Any process that activates or increases the frequency, rate or extent of pri-miRNA transcription mediated by RNA polymerase II.\" [GO_REF:0000058, GOC:dph, GOC:kmv, GOC:TermGenie, PMID:24699…	3	3	0.0257303	7.36744e-06	HIF1A,STAT3,TP53	1
positive regulation of programmed cell death	info:{"super-categories": "['positive regulation of biological process', 'regulation of cellular process']", "namespace": "biological_process", "id": "GO:0043068", "def": "\"Any process that activates or increases the frequency, rate or extent of programmed cell death, cell death resulting from activation of endogenous cellular processes.\" [GOC:jl]", "name": "positive regulation of programmed ce…	8	8	0.548913	1.71297e-07	BCL2L11,CDKN1A,CYLD,E2F3,HMGA2,MYC,PTEN,TP53	1
positive regulation of protein complex assembly	info:{"super-categories": "['positive regulation of biological process', 'regulation of cellular component biogenesis', 'regulation of cellular process']", "namespace": "biological_process", "id": "GO:0031334", "def": "\"Any process that activates or increases the frequency, rate or extent of protein complex assembly.\" [GOC:mah]", "name": "positive regulation of protein complex assembly"}	3	3	0.197266	0.00121713	BCL2L11,TP53,VEGFA	1
positive regulation of protein kinase activity	info:{"super-categories": "['positive regulation of biological process', 'positive regulation of molecular function', 'regulation of catalytic activity', 'regulation of cellular process', 'regulation of metabolic process']", "namespace": "biological_process", "id": "GO:0045860", "def": "\"Any process that activates or increases the frequency, rate or extent of protein kinase activity.\" [GOC:go_c…	5	5	0.45028	0.000117844	CCND1,CCND2,CDKN1A,HMGA2,VEGFA	1
positive regulation of protein metabolic process	info:{"super-categories": "['positive regulation of biological process', 'regulation of metabolic process']", "namespace": "biological_process", "id": "GO:0051247", "def": "\"Any process that activates or increases the frequency, rate or extent of the chemical reactions and pathways involving a protein.\" [GOC:ai]", "name": "positive regulation of protein metabolic process"}	12	12	1.43661	7.01471e-09	BCL2L11,BRCA1,CCND1,CCND2,CDKN1A,HMGA2,MYC,PTEN,STAT3,TP53,VEGFA,XIAP	1
positive regulation of protein modification process	info:{"super-categories": "['positive regulation of biological process', 'regulation of cellular process', 'regulation of metabolic process']", "namespace": "biological_process", "id": "GO:0031401", "def": "\"Any process that activates or increases the frequency, rate or extent of the covalent alteration of one or more amino acid residues within a protein.\" [GOC:mah, GOC:tb]", "name": "positive …	10	10	1.03693	8.05268e-08	BRCA1,CCND1,CCND2,CDKN1A,HMGA2,PTEN,STAT3,TP53,VEGFA,XIAP	1
positive regulation of protein phosphorylation	info:{"super-categories": "['positive regulation of biological process', 'regulation of cellular process', 'regulation of metabolic process']", "namespace": "biological_process", "id": "GO:0001934", "def": "\"Any process that activates or increases the frequency, rate or extent of addition of phosphate groups to amino acids within a protein.\" [GOC:hjd]", "name": "positive regulation of protein p…	8	8	0.849099	2.70272e-06	CCND1,CCND2,CDKN1A,HMGA2,PTEN,STAT3,TP53,VEGFA	1
positive regulation of protein serine/threonine kinase activity	info:{"super-categories": "['positive regulation of biological process', 'positive regulation of molecular function', 'regulation of catalytic activity', 'regulation of cellular process', 'regulation of metabolic process']", "namespace": "biological_process", "id": "GO:0071902", "def": "\"Any process that increases the rate, frequency, or extent of protein serine/threonine kinase activity.\" [GOC…	4	4	0.284748	0.000265078	CCND1,CCND2,HMGA2,VEGFA	1
positive regulation of protein ubiquitination	info:{"super-categories": "['positive regulation of biological process', 'regulation of cellular process', 'regulation of metabolic process']", "namespace": "biological_process", "id": "GO:0031398", "def": "\"Any process that activates or increases the frequency, rate or extent of the addition of ubiquitin groups to a protein.\" [GOC:mah]", "name": "positive regulation of protein ubiquitination"}	3	3	0.0986328	0.000216932	BRCA1,PTEN,XIAP	1
positive regulation of proteolysis	info:{"super-categories": "['positive regulation of biological process', 'regulation of cellular process', 'regulation of metabolic process']", "namespace": "biological_process", "id": "GO:0045862", "def": "\"Any process that activates or increases the frequency, rate or extent of the hydrolysis of a peptide bond or bonds within a protein.\" [GOC:go_curators]", "name": "positive regulation of pro…	4	4	0.301044	0.00031659	BCL2L11,MYC,PTEN,STAT3	1
positive regulation of response to DNA damage stimulus	info:{"super-categories": "['positive regulation of biological process', 'regulation of cellular process', 'regulation of response to stimulus']", "namespace": "biological_process", "id": "GO:2001022", "def": "\"Any process that activates or increases the frequency, rate or extent of response to DNA damage stimulus.\" [GOC:obol]", "name": "positive regulation of response to DNA damage stimulus"}	3	3	0.0857676	0.000150365	BRCA1,HMGA2,MYC	1
positive regulation of signal transduction	info:{"super-categories": "['positive regulation of biological process', 'regulation of cellular process', 'regulation of response to stimulus', 'regulation of signaling']", "namespace": "biological_process", "id": "GO:0009967", "def": "\"Any process that activates or increases the frequency, rate or extent of signal transduction.\" [GOC:sm]", "name": "positive regulation of signal transduction"}	8	8	1.41345	6.05565e-05	BCL2L11,CYLD,HIF1A,PTEN,STAT3,TP53,VEGFA,XIAP	1
positive regulation of stem cell proliferation	info:{"super-categories": "['positive regulation of biological process', 'regulation of cellular process']", "namespace": "biological_process", "id": "GO:2000648", "def": "\"Any process that activates or increases the frequency, rate or extent of stem cell proliferation.\" [GOC:dph]", "name": "positive regulation of stem cell proliferation"}	3	3	0.0351647	1.59581e-05	HIF1A,HMGA2,VEGFA	1
positive regulation of transcription by RNA polymerase II	info:{"super-categories": "['positive regulation of biological process', 'regulation of cellular process', 'regulation of metabolic process']", "namespace": "biological_process", "id": "GO:0045944", "def": "\"Any process that activates or increases the frequency, rate or extent of transcription from an RNA polymerase II promoter.\" [GOC:go_curators, GOC:txnOH]", "name": "positive regulation of tr…	9	9	1.01806	8.85781e-07	BRCA1,E2F3,HIF1A,HMGA2,MYC,RB1,STAT3,TP53,VEGFA	1
positive regulation of transcription from RNA polymerase II promoter in response to hypoxia	info:{"super-categories": "['cellular response to stress', 'positive regulation of biological process', 'regulation of cellular process', 'regulation of metabolic process']", "namespace": "biological_process", "id": "GO:0061419", "def": "\"Any process that increases the frequency, rate or extent of transcription from an RNA polymerase II promoter as a result of a hypoxia stimulus.\" [GOC:dph]", "…	3	3	0.00514606	9.15024e-08	HIF1A,TP53,VEGFA	1
positive regulation of transcription from RNA polymerase II promoter in response to stress	info:{"super-categories": "['cellular response to stress', 'positive regulation of biological process', 'regulation of cellular process', 'regulation of metabolic process']", "namespace": "biological_process", "id": "GO:0036003", "def": "\"Any process that increases the frequency, rate or extent of transcription from an RNA polymerase II promoter as a result of a stimulus indicating the organism …	3	3	0.026588	7.94867e-06	HIF1A,TP53,VEGFA	1
positive regulation of transcription from RNA polymerase II promoter involved in cellular response to chemical stimulus	info:{"super-categories": "['positive regulation of biological process', 'regulation of cellular process', 'regulation of metabolic process']", "namespace": "biological_process", "id": "GO:1901522", "def": "\"Any positive regulation of transcription from RNA polymerase II promoter that is involved in cellular response to chemical stimulus.\" [GOC:TermGenie, PMID:22840777]", "name": "positive regu…	3	3	0.0188689	3.45633e-06	HIF1A,TP53,VEGFA	1
positive regulation of transcription, DNA-templated	info:{"super-categories": "['positive regulation of biological process', 'regulation of cellular process', 'regulation of metabolic process']", "namespace": "biological_process", "id": "GO:0045893", "def": "\"Any process that activates or increases the frequency, rate or extent of cellular DNA-templated transcription.\" [GOC:go_curators, GOC:txnOH]", "name": "positive regulation of transcription,…	9	9	1.30881	4.91132e-06	BRCA1,E2F3,HIF1A,HMGA2,MYC,RB1,STAT3,TP53,VEGFA	1
positive regulation of transport	info:{"super-categories": "['positive regulation of biological process', 'regulation of localization']", "namespace": "biological_process", "id": "GO:0051050", "def": "\"Any process that activates or increases the frequency, rate or extent of the directed movement of substances (such as macromolecules, small molecules, ions) into, out of or within a cell, or between cells, by means of some agent …	3	3	0.833661	0.0491322	HIF1A,TP53,VEGFA	1
programmed cell death	info:{"super-categories": "[]", "namespace": "biological_process", "id": "GO:0012501", "def": "\"A process which begins when a cell receives an internal or external signal and activates a series of biochemical events (signaling pathway). The process ends with the death of the cell.\" [GOC:lr, GOC:mtg_apoptosis]", "name": "programmed cell death"}	8	8	0.681853	6.99024e-07	BCL2L11,BRCA1,CYLD,MYC,PTEN,RB1,TP53,XIAP	1
protein deubiquitination	info:{"super-categories": "['cellular macromolecule metabolic process', 'macromolecule metabolic process', 'organonitrogen compound metabolic process', 'protein metabolic process']", "namespace": "biological_process", "id": "GO:0016579", "def": "\"The removal of one or more ubiquitin groups from a protein.\" [GOC:ai]", "name": "protein deubiquitination"}	6	6	0.235003	4.77006e-07	BRCA1,CYLD,HIF1A,MYC,PTEN,TP53	1
protein import	info:{"super-categories": "['establishment of protein localization', 'protein localization', 'transport']", "namespace": "biological_process", "id": "GO:0017038", "def": "\"The targeting and directed movement of proteins into a cell or organelle. Not all import involves an initial targeting event.\" [GOC:ai]", "name": "protein import"}	3	3	0.117502	0.000329793	CDKN1A,STAT3,TP53	1
protein import into nucleus	info:{"super-categories": "['cellular macromolecule localization', 'establishment of protein localization', 'intracellular transport', 'protein localization', 'transport']", "namespace": "biological_process", "id": "GO:0006606", "def": "\"The directed movement of a protein from the cytoplasm to the nucleus.\" [GOC:jl]", "name": "protein import into nucleus"}	3	3	0.0797639	0.000122793	CDKN1A,STAT3,TP53	1
protein localization	info:{"super-categories": "[]", "namespace": "biological_process", "id": "GO:0008104", "def": "\"Any process in which a protein is transported to, or maintained in, a specific location.\" [GOC:ai]", "name": "protein localization"}	5	5	1.67504	0.022242	BCL2L11,CDKN1A,RB1,STAT3,TP53	1
protein localization to nucleus	info:{"super-categories": "['cellular macromolecule localization', 'protein localization']", "namespace": "biological_process", "id": "GO:0034504", "def": "\"A process in which a protein transports or maintains the localization of another protein to the nucleus.\" [GOC:ecd]", "name": "protein localization to nucleus"}	3	3	0.120075	0.000348808	CDKN1A,STAT3,TP53	1
protein localization to organelle	info:{"super-categories": "['cellular macromolecule localization', 'protein localization']", "namespace": "biological_process", "id": "GO:0033365", "def": "\"A process in which a protein is transported to, or maintained in, a location within an organelle.\" [GOC:mah]", "name": "protein localization to organelle"}	5	5	0.574643	0.00031659	BCL2L11,CDKN1A,RB1,STAT3,TP53	1
protein metabolic process	info:{"super-categories": "['macromolecule metabolic process', 'organonitrogen compound metabolic process']", "namespace": "biological_process", "id": "GO:0019538", "def": "\"The chemical reactions and pathways involving a protein. Includes protein modification.\" [GOC:ma]", "name": "protein metabolic process"}	11	11	3.37667	0.000132245	BRCA1,CCND1,CCND2,CYLD,HIF1A,HMGA2,MYC,PTEN,TP53,WEE1,XIAP	1
protein modification by small protein conjugation	info:{"super-categories": "['cellular macromolecule metabolic process', 'macromolecule metabolic process', 'organonitrogen compound metabolic process', 'protein metabolic process']", "namespace": "biological_process", "id": "GO:0032446", "def": "\"A protein modification process in which one or more groups of a small protein, such as ubiquitin or a ubiquitin-like protein, are covalently attached t…	3	3	0.650976	0.0269094	BRCA1,HIF1A,XIAP	1
protein modification by small protein removal	info:{"super-categories": "['cellular macromolecule metabolic process', 'macromolecule metabolic process', 'organonitrogen compound metabolic process', 'protein metabolic process']", "namespace": "biological_process", "id": "GO:0070646", "def": "\"A protein modification process in which one or more covalently attached groups of a small protein, such as ubiquitin or a ubiquitin-like protein, are r…	6	6	0.248726	6.36616e-07	BRCA1,CYLD,HIF1A,MYC,PTEN,TP53	1
protein modification process	info:{"super-categories": "['macromolecule metabolic process', 'organonitrogen compound metabolic process', 'protein metabolic process']", "namespace": "biological_process", "id": "GO:0036211", "def": "\"The covalent alteration of one or more amino acids occurring in proteins, peptides and nascent polypeptides (co-translational, post-translational modifications). Includes the modification of char…	11	11	2.54644	1.33937e-05	BRCA1,CCND1,CCND2,CYLD,HIF1A,HMGA2,MYC,PTEN,TP53,WEE1,XIAP	1
protein phosphorylation	info:{"super-categories": "['cellular macromolecule metabolic process', 'macromolecule metabolic process', 'organonitrogen compound metabolic process', 'phosphorus metabolic process', 'protein metabolic process']", "namespace": "biological_process", "id": "GO:0006468", "def": "\"The process of introducing a phosphate group on to a protein.\" [GOC:hb]", "name": "protein phosphorylation"}	5	5	0.790777	0.00111358	CCND1,CCND2,HMGA2,MYC,WEE1	1
protein stabilization	info:{"super-categories": "['regulation of protein stability']", "namespace": "biological_process", "id": "GO:0050821", "def": "\"Any process involved in maintaining the structure and integrity of a protein and preventing it from degradation or aggregation.\" [GOC:ai]", "name": "protein stabilization"}	3	3	0.151809	0.000635029	CDKN1A,PTEN,TP53	1
protein transport	info:{"super-categories": "['establishment of protein localization', 'protein localization', 'transport']", "namespace": "biological_process", "id": "GO:0015031", "def": "\"The directed movement of proteins into, out of or within a cell, or between cells, by means of some agent such as a transporter or pore.\" [GOC:ai]", "name": "protein transport"}	3	3	1.1896	0.112992	CDKN1A,STAT3,TP53	1
protein ubiquitination	info:{"super-categories": "['cellular macromolecule metabolic process', 'macromolecule metabolic process', 'organonitrogen compound metabolic process', 'protein metabolic process']", "namespace": "biological_process", "id": "GO:0016567", "def": "\"The process in which one or more ubiquitin groups are added to a protein.\" [GOC:ai]", "name": "protein ubiquitination"}	3	3	0.584077	0.0205126	BRCA1,HIF1A,XIAP	1
protein-containing complex assembly	info:{"super-categories": "['cellular component assembly', 'protein-containing complex subunit organization']", "namespace": "biological_process", "id": "GO:0065003", "def": "\"The aggregation, arrangement and bonding together of a set of macromolecules to form a protein-containing complex.\" [GOC:jl]", "name": "protein-containing complex assembly"}	3	3	1.20075	0.115121	CYLD,MYC,TP53	1
proteolysis	info:{"super-categories": "['macromolecule metabolic process', 'organonitrogen compound metabolic process', 'protein metabolic process']", "namespace": "biological_process", "id": "GO:0006508", "def": "\"The hydrolysis of proteins into smaller polypeptides and/or amino acids by cleavage of their peptide bonds.\" [GOC:bf, GOC:mah]", "name": "proteolysis"}	6	6	1.04465	0.000547338	BRCA1,CYLD,HIF1A,MYC,PTEN,TP53	1
regulation of ATP metabolic process	info:{"super-categories": "['regulation of metabolic process']", "namespace": "biological_process", "id": "GO:1903578", "def": "\"Any process that modulates the frequency, rate or extent of ATP metabolic process.\" [GO_REF:0000058, GOC:TermGenie, PMID:20695849]", "name": "regulation of ATP metabolic process"}	3	3	0.101206	0.000229181	HIF1A,STAT3,TP53	1
regulation of DNA biosynthetic process	info:{"super-categories": "['regulation of cellular process', 'regulation of metabolic process']", "namespace": "biological_process", "id": "GO:2000278", "def": "\"Any process that modulates the frequency, rate or extent of DNA biosynthetic process.\" [GOC:obol]", "name": "regulation of DNA biosynthetic process"}	3	3	0.092629	0.000184023	CDKN1A,MYC,TP53	1
regulation of DNA-binding transcription factor activity	info:{"super-categories": "['regulation of cellular process', 'regulation of metabolic process']", "namespace": "biological_process", "id": "GO:0051090", "def": "\"Any process that modulates the frequency, rate or extent of the activity of a transcription factor, any factor involved in the initiation or regulation of transcription.\" [GOC:ai]", "name": "regulation of DNA-binding transcription fac…	5	5	0.359366	4.82886e-05	CYLD,PTEN,RB1,STAT3,VEGFA	1
regulation of DNA-templated transcription in response to stress	info:{"super-categories": "['cellular response to stress', 'regulation of cellular process', 'regulation of metabolic process']", "namespace": "biological_process", "id": "GO:0043620", "def": "\"Modulation of the frequency, rate or extent of transcription from a DNA template as a result of a stimulus indicating the organism is under stress. The stress is usually, but not necessarily, exogenous (e…	3	3	0.105494	0.000255897	HIF1A,TP53,VEGFA	1
regulation of G1/S transition of mitotic cell cycle	info:{"super-categories": "['regulation of cellular process']", "namespace": "biological_process", "id": "GO:2000045", "def": "\"Any signalling pathway that modulates the activity of a cell cycle cyclin-dependent protein kinase to modulate the switch from G1 phase to S phase of the mitotic cell cycle.\" [GOC:mtg_cell_cycle]", "name": "regulation of G1/S transition of mitotic cell cycle"}	7	7	0.127794	7.36188e-10	CCND1,CCND2,CDKN1A,PTEN,RB1,TP53,WEE1	1
regulation of G2/M transition of mitotic cell cycle	info:{"super-categories": "['regulation of cellular process']", "namespace": "biological_process", "id": "GO:0010389", "def": "\"Any signalling pathway that modulates the activity of a cell cycle cyclin-dependent protein kinase to modulate the switch from G2 phase to M phase of the mitotic cell cycle.\" [GOC:mtg_cell_cycle, PMID:17329565]", "name": "regulation of G2/M transition of mitotic cell c…	3	3	0.165532	0.000783998	BRCA1,CCND1,HMGA2	1
regulation of MAPK cascade	info:{"super-categories": "['regulation of cellular process', 'regulation of metabolic process', 'regulation of response to stimulus', 'regulation of signaling']", "namespace": "biological_process", "id": "GO:0043408", "def": "\"Any process that modulates the frequency, rate or extent of signal transduction mediated by the MAP kinase (MAPK) cascade.\" [GOC:go_curators]", "name": "regulation of MA…	4	4	0.630392	0.00355236	CYLD,MYC,PTEN,VEGFA	1
regulation of RNA biosynthetic process	info:{"super-categories": "['regulation of cellular process', 'regulation of metabolic process']", "namespace": "biological_process", "id": "GO:2001141", "def": "\"Any process that modulates the frequency, rate or extent of RNA biosynthetic process.\" [GOC:dph]", "name": "regulation of RNA biosynthetic process"}	14	14	2.9101	6.70079e-08	BRCA1,CCND1,CDKN1A,CYLD,E2F3,HIF1A,HMGA2,MYC,PTEN,RB1,STAT3,TP53,VEGFA,XIAP	1
regulation of RNA metabolic process	info:{"super-categories": "['regulation of cellular process', 'regulation of metabolic process']", "namespace": "biological_process", "id": "GO:0051252", "def": "\"Any process that modulates the frequency, rate or extent of the chemical reactions and pathways involving RNA.\" [GOC:ai]", "name": "regulation of RNA metabolic process"}	14	14	3.11765	1.55258e-07	BRCA1,CCND1,CDKN1A,CYLD,E2F3,HIF1A,HMGA2,MYC,PTEN,RB1,STAT3,TP53,VEGFA,XIAP	1
regulation of angiogenesis	info:{"super-categories": "['regulation of developmental process', 'regulation of multicellular organismal process']", "namespace": "biological_process", "id": "GO:0045765", "def": "\"Any process that modulates the frequency, rate or extent of angiogenesis.\" [GOC:go_curators]", "name": "regulation of angiogenesis"}	5	5	0.246153	1.06735e-05	BRCA1,HIF1A,HMGA2,STAT3,VEGFA	1
regulation of apoptotic process	info:{"super-categories": "['regulation of cellular process']", "namespace": "biological_process", "id": "GO:0042981", "def": "\"Any process that modulates the occurrence or rate of cell death by apoptotic process.\" [GOC:jl, GOC:mtg_apoptosis]", "name": "regulation of apoptotic process"}	15	15	1.30453	4.35029e-13	BCL2L11,BRCA1,CCND2,CDKN1A,CYLD,E2F3,HIF1A,HMGA2,MYC,PTEN,RB1,STAT3,TP53,VEGFA,XIAP	1
regulation of autophagy	info:{"super-categories": "['regulation of cellular process', 'regulation of metabolic process']", "namespace": "biological_process", "id": "GO:0010506", "def": "\"Any process that modulates the frequency, rate or extent of autophagy. Autophagy is the process in which cells digest parts of their own cytoplasm.\" [GOC:dph, GOC:tb]", "name": "regulation of autophagy"}	4	4	0.278745	0.000246346	BCL2L11,HIF1A,STAT3,TP53	1
regulation of binding	info:{"super-categories": "[]", "namespace": "biological_process", "id": "GO:0051098", "def": "\"Any process that modulates the frequency, rate or extent of binding, the selective interaction of a molecule with one or more specific sites on another molecule.\" [GOC:ai]", "name": "regulation of binding"}	3	3	0.323344	0.00440786	CYLD,HMGA2,RB1	1
regulation of body fluid levels	info:{"super-categories": "[]", "namespace": "biological_process", "id": "GO:0050878", "def": "\"Any process that modulates the levels of body fluids.\" [GOC:ai, GOC:dph, GOC:tb]", "name": "regulation of body fluid levels"}	3	3	0.329348	0.00461538	CCND1,HIF1A,VEGFA	1
regulation of catalytic activity	info:{"super-categories": "[]", "namespace": "biological_process", "id": "GO:0050790", "def": "\"Any process that modulates the activity of an enzyme.\" [GOC:ai, GOC:ebc, GOC:vw]", "name": "regulation of catalytic activity"}	13	13	1.95036	1.05371e-08	BCL2L11,CCND1,CCND2,CDKN1A,HIF1A,HMGA2,MYC,PTEN,RB1,STAT3,TP53,VEGFA,XIAP	1
regulation of cell adhesion	info:{"super-categories": "[]", "namespace": "biological_process", "id": "GO:0030155", "def": "\"Any process that modulates the frequency, rate or extent of attachment of a cell to another cell or to the extracellular matrix.\" [GOC:mah]", "name": "regulation of cell adhesion"}	3	3	0.575501	0.0198285	CYLD,PTEN,VEGFA	1
regulation of cell cycle	info:{"super-categories": "['regulation of cellular process']", "namespace": "biological_process", "id": "GO:0051726", "def": "\"Any process that modulates the rate or extent of progression through the cell cycle.\" [GOC:ai, GOC:dph, GOC:tb]", "name": "regulation of cell cycle"}	14	14	1.00005	4.35029e-13	BCL2L11,BRCA1,CCND1,CCND2,CDKN1A,CYLD,E2F3,HMGA2,MYC,PTEN,RB1,STAT3,TP53,WEE1	1
regulation of cell cycle G1/S phase transition	info:{"super-categories": "['regulation of cellular process']", "namespace": "biological_process", "id": "GO:1902806", "def": "\"Any signalling pathway that modulates the activity of a cell cycle cyclin-dependent protein kinase to modulate the switch from G1 phase to S phase of the cell cycle.\" [GO_REF:0000058, GOC:mtg_cell_cycle, GOC:TermGenie]", "name": "regulation of cell cycle G1/S phase tra…	7	7	0.140659	1.24311e-09	CCND1,CCND2,CDKN1A,PTEN,RB1,TP53,WEE1	1
regulation of cell cycle G2/M phase transition	info:{"super-categories": "['regulation of cellular process']", "namespace": "biological_process", "id": "GO:1902749", "def": "\"Any signalling pathway that modulates the activity of a cell cycle cyclin-dependent protein kinase to modulate the switch from G2 phase to M phase of the cell cycle.\" [GO_REF:0000058, GOC:jl, GOC:TermGenie]", "name": "regulation of cell cycle G2/M phase transition"}	4	4	0.180112	5.84211e-05	BRCA1,CCND1,HMGA2,TP53	1
regulation of cell cycle arrest	info:{"super-categories": "['regulation of cellular process']", "namespace": "biological_process", "id": "GO:0071156", "def": "\"Any process that modulates the rate, frequency, or extent of cell cycle arrest, the process in which the cell cycle is halted during one of the normal phases.\" [GOC:mah]", "name": "regulation of cell cycle arrest"}	5	5	0.090056	1.75711e-07	BRCA1,CCND1,CDKN1A,HMGA2,TP53	1
regulation of cell cycle phase transition	info:{"super-categories": "['regulation of cellular process']", "namespace": "biological_process", "id": "GO:1901987", "def": "\"Any process that modulates the frequency, rate or extent of cell cycle phase transition.\" [GOC:mtg_cell_cycle, GOC:TermGenie, PMID:22841721]", "name": "regulation of cell cycle phase transition"}	9	9	0.377378	7.92485e-10	BRCA1,CCND1,CCND2,CDKN1A,HMGA2,PTEN,RB1,TP53,WEE1	1
regulation of cell cycle process	info:{"super-categories": "['regulation of cellular process']", "namespace": "biological_process", "id": "GO:0010564", "def": "\"Any process that modulates a cellular process that is involved in the progression of biochemical and morphological phases and events that occur in a cell during successive cell replication or nuclear replication events.\" [GOC:dph, GOC:tb]", "name": "regulation of cell …	9	9	0.637253	2.65649e-08	BRCA1,CCND1,CCND2,CDKN1A,HMGA2,PTEN,RB1,TP53,WEE1	1
regulation of cell death	info:{"super-categories": "['regulation of cellular process']", "namespace": "biological_process", "id": "GO:0010941", "def": "\"Any process that modulates the rate or frequency of cell death. Cell death is the specific activation or halting of processes within a cell so that its vital functions markedly cease, rather than simply deteriorating gradually over time, which culminates in cell death.\…	15	15	1.42203	7.70214e-13	BCL2L11,BRCA1,CCND2,CDKN1A,CYLD,E2F3,HIF1A,HMGA2,MYC,PTEN,RB1,STAT3,TP53,VEGFA,XIAP	1
regulation of cell differentiation	info:{"super-categories": "['regulation of cellular process', 'regulation of developmental process']", "namespace": "biological_process", "id": "GO:0045595", "def": "\"Any process that modulates the frequency, rate or extent of cell differentiation, the process in which relatively unspecialized cells acquire specialized structural and functional features.\" [GOC:go_curators]", "name": "regulation…	9	9	1.52752	1.42062e-05	CCND1,CYLD,HIF1A,MYC,PTEN,RB1,STAT3,TP53,VEGFA	1
regulation of cell growth	info:{"super-categories": "['regulation of cellular process', 'regulation of growth']", "namespace": "biological_process", "id": "GO:0001558", "def": "\"Any process that modulates the frequency, rate, extent or direction of cell growth.\" [GOC:go_curators]", "name": "regulation of cell growth"}	4	4	0.348217	0.000506684	CDKN1A,RB1,TP53,VEGFA	1
regulation of cell migration	info:{"super-categories": "['regulation of cellular process', 'regulation of localization', 'regulation of locomotion']", "namespace": "biological_process", "id": "GO:0030334", "def": "\"Any process that modulates the frequency, rate or extent of cell migration.\" [GOC:go_curators]", "name": "regulation of cell migration"}	5	5	0.721306	0.000772606	HIF1A,PTEN,STAT3,TP53,VEGFA	1
regulation of cell motility	info:{"super-categories": "['regulation of cellular process', 'regulation of localization', 'regulation of locomotion']", "namespace": "biological_process", "id": "GO:2000145", "def": "\"Any process that modulates the frequency, rate or extent of cell motility.\" [GOC:mah]", "name": "regulation of cell motility"}	5	5	0.776197	0.00103866	HIF1A,PTEN,STAT3,TP53,VEGFA	1
regulation of cell population proliferation	info:{"super-categories": "['regulation of cellular process']", "namespace": "biological_process", "id": "GO:0042127", "def": "\"Any process that modulates the frequency, rate or extent of cell proliferation.\" [GOC:jl]", "name": "regulation of cell population proliferation"}	14	14	1.35942	1.73536e-11	BRCA1,CCND1,CCND2,CDKN1A,E2F3,HIF1A,HMGA2,MYC,PTEN,RB1,STAT3,TP53,VEGFA,XIAP	1
regulation of cell projection organization	info:{"super-categories": "['regulation of cellular process']", "namespace": "biological_process", "id": "GO:0031344", "def": "\"Any process that modulates the frequency, rate or extent of a process involved in the formation, arrangement of constituent parts, or disassembly of cell projections.\" [GOC:mah]", "name": "regulation of cell projection organization"}	3	3	0.576358	0.0198549	CYLD,PTEN,VEGFA	1
regulation of cellular component movement	info:{"super-categories": "['regulation of cellular process', 'regulation of localization']", "namespace": "biological_process", "id": "GO:0051270", "def": "\"Any process that modulates the frequency, rate or extent of the movement of a cellular component.\" [GOC:ai, GOC:dph, GOC:jl]", "name": "regulation of cellular component movement"}	5	5	0.839665	0.00139676	HIF1A,PTEN,STAT3,TP53,VEGFA	1
regulation of cellular component organization	info:{"super-categories": "['regulation of cellular process']", "namespace": "biological_process", "id": "GO:0051128", "def": "\"Any process that modulates the frequency, rate or extent of a process involved in the formation, arrangement of constituent parts, or disassembly of cell structures, including the plasma membrane and any external encapsulating structures such as the cell wall and cell e…	10	10	2.07815	1.76992e-05	BCL2L11,BRCA1,CDKN1A,CYLD,HIF1A,MYC,PTEN,RB1,TP53,VEGFA	1
regulation of cellular localization	info:{"super-categories": "['regulation of localization']", "namespace": "biological_process", "id": "GO:0060341", "def": "\"Any process that modulates the frequency, rate or extent of a process in which a cell, a substance, or a cellular entity is transported to, or maintained in a specific location within or in the membrane of a cell.\" [GOC:dph, GOC:tb]", "name": "regulation of cellular locali…	5	5	0.677564	0.000606729	CYLD,HIF1A,PTEN,RB1,TP53	1
regulation of cellular process	info:{"super-categories": "[]", "namespace": "biological_process", "id": "GO:0050794", "def": "\"Any process that modulates the frequency, rate or extent of a cellular process, any of those that are carried out at the cellular level, but are not necessarily restricted to a single cell. For example, cell communication occurs among more than one cell, but occurs at the cellular level.\" [GOC:go_cur…	17	17	8.9833	4.58575e-05	BCL2L11,BRCA1,CCND1,CCND2,CDKN1A,CYLD,E2F3,HIF1A,HMGA2,MYC,PTEN,RB1,STAT3,TP53,VEGFA,WEE1,XIAP	1
regulation of cellular protein localization	info:{"super-categories": "['regulation of localization']", "namespace": "biological_process", "id": "GO:1903827", "def": "\"Any process that modulates the frequency, rate or extent of cellular protein localization. Cellular protein localization is any process in which a protein is transported to, and/or maintained in, a specific location and encompasses movement within the cell, from within the …	3	3	0.457141	0.0109387	CYLD,RB1,TP53	1
regulation of cellular protein metabolic process	info:{"super-categories": "['regulation of cellular process', 'regulation of metabolic process']", "namespace": "biological_process", "id": "GO:0032268", "def": "\"Any process that modulates the frequency, rate or extent of the chemical reactions and pathways involving a protein, occurring at the level of an individual cell.\" [GOC:mah]", "name": "regulation of cellular protein metabolic process"}	14	14	2.2008	3.42685e-09	BCL2L11,BRCA1,CCND1,CCND2,CDKN1A,CYLD,HMGA2,MYC,PTEN,RB1,STAT3,TP53,VEGFA,XIAP	1
regulation of cellular response to stress	info:{"super-categories": "['regulation of cellular process', 'regulation of response to stimulus']", "namespace": "biological_process", "id": "GO:0080135", "def": "\"Any process that modulates the frequency, rate or extent of a cellular response to stress. Cellular response to stress is a change in state or activity of a cell (in terms of movement, secretion, enzyme production, gene expression, …	9	9	0.614954	2.0456e-08	BCL2L11,BRCA1,CYLD,HIF1A,HMGA2,MYC,PTEN,TP53,VEGFA	1
regulation of chromatin organization	info:{"super-categories": "['regulation of cellular process']", "namespace": "biological_process", "id": "GO:1902275", "def": "\"Any process that modulates the frequency, rate or extent of chromatin organization.\" [GO_REF:0000058, GOC:bf, GOC:TermGenie, GOC:vw, PMID:18314879]", "name": "regulation of chromatin organization"}	3	3	0.161243	0.000736304	BRCA1,TP53,VEGFA	1
regulation of chromosome organization	info:{"super-categories": "['regulation of cellular process']", "namespace": "biological_process", "id": "GO:0033044", "def": "\"Any process that modulates the frequency, rate or extent of a process involved in the formation, arrangement of constituent parts, or disassembly of a chromosome.\" [GOC:mah]", "name": "regulation of chromosome organization"}	5	5	0.293325	2.08869e-05	BRCA1,MYC,RB1,TP53,VEGFA	1
regulation of cyclin-dependent protein serine/threonine kinase activity	info:{"super-categories": "['regulation of catalytic activity', 'regulation of cellular process', 'regulation of metabolic process']", "namespace": "biological_process", "id": "GO:0000079", "def": "\"Any process that modulates the frequency, rate or extent of cyclin-dependent protein serine/threonine kinase activity.\" [GOC:go_curators, GOC:pr]", "name": "regulation of cyclin-dependent protein se…	4	4	0.0823369	4.67545e-06	CCND1,CCND2,CDKN1A,PTEN	1
regulation of cysteine-type endopeptidase activity	info:{"super-categories": "['regulation of catalytic activity', 'regulation of metabolic process']", "namespace": "biological_process", "id": "GO:2000116", "def": "\"Any process that modulates the frequency, rate or extent of cysteine-type endopeptidase activity.\" [GOC:obol, GOC:yaf]", "name": "regulation of cysteine-type endopeptidase activity"}	4	4	0.198123	7.80958e-05	BCL2L11,MYC,VEGFA,XIAP	1
regulation of cysteine-type endopeptidase activity involved in apoptotic process	info:{"super-categories": "['regulation of catalytic activity', 'regulation of cellular process', 'regulation of metabolic process']", "namespace": "biological_process", "id": "GO:0043281", "def": "\"Any process that modulates the activity of a cysteine-type endopeptidase involved in apoptosis.\" [GOC:jl, GOC:mtg_apoptosis]", "name": "regulation of cysteine-type endopeptidase activity involved in…	4	4	0.178397	5.68892e-05	BCL2L11,MYC,VEGFA,XIAP	1
regulation of cytokine production	info:{"super-categories": "['regulation of multicellular organismal process']", "namespace": "biological_process", "id": "GO:0001817", "def": "\"Any process that modulates the frequency, rate, or extent of production of a cytokine.\" [GOC:add, ISBN:0781735149]", "name": "regulation of cytokine production"}	4	4	0.590081	0.00283509	BRCA1,CYLD,HIF1A,STAT3	1
regulation of developmental growth	info:{"super-categories": "['regulation of developmental process', 'regulation of growth']", "namespace": "biological_process", "id": "GO:0048638", "def": "\"Any process that modulates the frequency, rate or extent of developmental growth.\" [GOC:go_curators]", "name": "regulation of developmental growth"}	5	5	0.278745	1.71449e-05	BCL2L11,CDKN1A,PTEN,STAT3,VEGFA	1
regulation of endopeptidase activity	info:{"super-categories": "['regulation of catalytic activity', 'regulation of metabolic process']", "namespace": "biological_process", "id": "GO:0052548", "def": "\"Any process that modulates the frequency, rate or extent of endopeptidase activity, the endohydrolysis of peptide bonds within proteins.\" [GOC:ai, GOC:hjd]", "name": "regulation of endopeptidase activity"}	5	5	0.344786	4.04778e-05	BCL2L11,MYC,STAT3,VEGFA,XIAP	1
regulation of endothelial cell proliferation	info:{"super-categories": "['regulation of cellular process']", "namespace": "biological_process", "id": "GO:0001936", "def": "\"Any process that modulates the frequency, rate, or extent of endothelial cell proliferation.\" [GOC:add]", "name": "regulation of endothelial cell proliferation"}	3	3	0.10721	0.000265078	HIF1A,STAT3,VEGFA	1
regulation of epithelial cell migration	info:{"super-categories": "['regulation of cellular process', 'regulation of localization', 'regulation of locomotion', 'regulation of multicellular organismal process']", "namespace": "biological_process", "id": "GO:0010632", "def": "\"Any process that modulates the frequency, rate or extent of epithelial cell migration.\" [GOC:BHF, GOC:dph, GOC:tb]", "name": "regulation of epithelial cell migra…	3	3	0.185258	0.0010413	HIF1A,PTEN,VEGFA	1
regulation of epithelial cell proliferation	info:{"super-categories": "['regulation of cellular process']", "namespace": "biological_process", "id": "GO:0050678", "def": "\"Any process that modulates the frequency, rate or extent of epithelial cell proliferation.\" [GOC:ai]", "name": "regulation of epithelial cell proliferation"}	7	7	0.281318	5.26287e-08	CCND1,HIF1A,MYC,PTEN,RB1,STAT3,VEGFA	1
regulation of extrinsic apoptotic signaling pathway	info:{"super-categories": "['regulation of cellular process', 'regulation of response to stimulus', 'regulation of signaling']", "namespace": "biological_process", "id": "GO:2001236", "def": "\"Any process that modulates the frequency, rate or extent of extrinsic apoptotic signaling pathway.\" [GOC:mtg_apoptosis]", "name": "regulation of extrinsic apoptotic signaling pathway"}	3	3	0.131224	0.000437657	BRCA1,CYLD,PTEN	1
regulation of fibroblast proliferation	info:{"super-categories": "['regulation of cellular process']", "namespace": "biological_process", "id": "GO:0048145", "def": "\"Any process that modulates the frequency, rate or extent of multiplication or reproduction of fibroblast cells.\" [GOC:jid]", "name": "regulation of fibroblast proliferation"}	3	3	0.0694718	8.60067e-05	CDKN1A,MYC,TP53	1
regulation of gene expression	info:{"super-categories": "['regulation of metabolic process']", "namespace": "biological_process", "id": "GO:0010468", "def": "\"Any process that modulates the frequency, rate or extent of gene expression. Gene expression is the process in which a gene's coding sequence is converted into a mature gene product or products (proteins or RNA). This includes the production of an RNA transcript as wel…	14	14	3.67343	9.29468e-07	BRCA1,CCND1,CDKN1A,CYLD,E2F3,HIF1A,HMGA2,MYC,PTEN,RB1,STAT3,TP53,VEGFA,XIAP	1
regulation of generation of precursor metabolites and energy	info:{"super-categories": "['regulation of cellular process', 'regulation of metabolic process']", "namespace": "biological_process", "id": "GO:0043467", "def": "\"Any process that modulates the frequency, rate or extent of the chemical reactions and pathways resulting in the formation of precursor metabolites, substances from which energy is derived, and the processes involved in the liberation …	3	3	0.13294	0.000451287	HIF1A,STAT3,TP53	1
regulation of glycolytic process	info:{"super-categories": "['regulation of cellular process', 'regulation of metabolic process']", "namespace": "biological_process", "id": "GO:0006110", "def": "\"Any process that modulates the frequency, rate or extent of glycolysis.\" [GOC:go_curators]", "name": "regulation of glycolytic process"}	3	3	0.0677564	8.09852e-05	HIF1A,STAT3,TP53	1
regulation of growth	info:{"super-categories": "[]", "namespace": "biological_process", "id": "GO:0040008", "def": "\"Any process that modulates the frequency, rate or extent of the growth of all or part of an organism so that it occurs at its proper speed, either globally or in a specific part of the organism's development.\" [GOC:ems, GOC:mah]", "name": "regulation of growth"}	9	9	0.562636	1.05371e-08	BCL2L11,CDKN1A,HIF1A,HMGA2,PTEN,RB1,STAT3,TP53,VEGFA	1
regulation of hemopoiesis	info:{"super-categories": "['regulation of developmental process', 'regulation of immune system process', 'regulation of multicellular organismal process']", "namespace": "biological_process", "id": "GO:1903706", "def": "\"Any process that modulates the frequency, rate or extent of hemopoiesis.\" [GO_REF:0000058, GOC:pad, GOC:PARL, GOC:TermGenie, PMID:20080761]", "name": "regulation of hemopoiesi…	5	5	0.380808	6.05565e-05	CYLD,HIF1A,MYC,RB1,STAT3	1
regulation of histone modification	info:{"super-categories": "['regulation of cellular process', 'regulation of metabolic process']", "namespace": "biological_process", "id": "GO:0031056", "def": "\"Any process that modulates the frequency, rate or extent of the covalent alteration of a histone.\" [GOC:mah]", "name": "regulation of histone modification"}	3	3	0.124363	0.000380866	BRCA1,TP53,VEGFA	1
regulation of immune system process	info:{"super-categories": "[]", "namespace": "biological_process", "id": "GO:0002682", "def": "\"Any process that modulates the frequency, rate, or extent of an immune system process.\" [GOC:add]", "name": "regulation of immune system process"}	9	9	1.28995	4.60316e-06	CDKN1A,CYLD,HIF1A,MYC,RB1,STAT3,TP53,VEGFA,XIAP	1
regulation of inflammatory response	info:{"super-categories": "['regulation of response to stimulus']", "namespace": "biological_process", "id": "GO:0050727", "def": "\"Any process that modulates the frequency, rate or extent of the inflammatory response, the immediate defensive reaction (by vertebrate tissue) to infection or injury caused by chemical or physical agents.\" [GOC:ai]", "name": "regulation of inflammatory response"}	3	3	0.286464	0.00319562	CYLD,RB1,XIAP	1
regulation of intracellular signal transduction	info:{"super-categories": "['regulation of cellular process', 'regulation of response to stimulus', 'regulation of signaling']", "namespace": "biological_process", "id": "GO:1902531", "def": "\"Any process that modulates the frequency, rate or extent of intracellular signal transduction.\" [GOC:dph, GOC:signaling, GOC:tb, GOC:TermGenie]", "name": "regulation of intracellular signal transduction"}	9	9	1.54039	1.49015e-05	BCL2L11,BRCA1,CYLD,HIF1A,MYC,PTEN,TP53,VEGFA,XIAP	1
regulation of intrinsic apoptotic signaling pathway	info:{"super-categories": "['regulation of cellular process', 'regulation of response to stimulus', 'regulation of signaling']", "namespace": "biological_process", "id": "GO:2001242", "def": "\"Any process that modulates the frequency, rate or extent of intrinsic apoptotic signaling pathway.\" [GOC:mtg_apoptosis]", "name": "regulation of intrinsic apoptotic signaling pathway"}	4	4	0.137228	2.37777e-05	BCL2L11,CYLD,HIF1A,TP53	1
regulation of kinase activity	info:{"super-categories": "['regulation of catalytic activity', 'regulation of cellular process', 'regulation of metabolic process']", "namespace": "biological_process", "id": "GO:0043549", "def": "\"Any process that modulates the frequency, rate or extent of kinase activity, the catalysis of the transfer of a phosphate group, usually from ATP, to a substrate molecule.\" [GOC:bf]", "name": "regul…	7	7	0.728167	1.10547e-05	CCND1,CCND2,CDKN1A,HMGA2,PTEN,RB1,VEGFA	1
regulation of locomotion	info:{"super-categories": "[]", "namespace": "biological_process", "id": "GO:0040012", "def": "\"Any process that modulates the frequency, rate or extent of locomotion of a cell or organism.\" [GOC:ems]", "name": "regulation of locomotion"}	5	5	0.835377	0.00137345	HIF1A,PTEN,STAT3,TP53,VEGFA	1
regulation of lymphocyte apoptotic process	info:{"super-categories": "['regulation of cellular process']", "namespace": "biological_process", "id": "GO:0070228", "def": "\"Any process that modulates the occurrence or rate of lymphocyte death by apoptotic process.\" [GOC:add, GOC:mtg_apoptosis, ISBN:0781765196]", "name": "regulation of lymphocyte apoptotic process"}	3	3	0.0463145	3.1513e-05	HIF1A,PTEN,TP53	1
regulation of metabolic process	info:{"super-categories": "[]", "namespace": "biological_process", "id": "GO:0019222", "def": "\"Any process that modulates the frequency, rate or extent of the chemical reactions and pathways within a cell or an organism.\" [GOC:go_curators]", "name": "regulation of metabolic process"}	16	16	5.53544	1.03337e-06	BCL2L11,BRCA1,CCND1,CCND2,CDKN1A,CYLD,E2F3,HIF1A,HMGA2,MYC,PTEN,RB1,STAT3,TP53,VEGFA,XIAP	1
regulation of mitochondrion organization	info:{"super-categories": "['regulation of cellular process']", "namespace": "biological_process", "id": "GO:0010821", "def": "\"Any process that modulates the frequency, rate or extent of a process involved in the formation, arrangement of constituent parts, or disassembly of a mitochondrion.\" [GOC:dph, GOC:tb]", "name": "regulation of mitochondrion organization"}	3	3	0.155239	0.000673089	BCL2L11,HIF1A,TP53	1
regulation of mitotic cell cycle	info:{"super-categories": "['regulation of cellular process']", "namespace": "biological_process", "id": "GO:0007346", "def": "\"Any process that modulates the rate or extent of progress through the mitotic cell cycle.\" [GOC:dph, GOC:go_curators, GOC:tb]", "name": "regulation of mitotic cell cycle"}	10	10	0.534332	5.22054e-10	BRCA1,CCND1,CCND2,CDKN1A,CYLD,HMGA2,PTEN,RB1,TP53,WEE1	1
regulation of mitotic cell cycle phase transition	info:{"super-categories": "['regulation of cellular process']", "namespace": "biological_process", "id": "GO:1901990", "def": "\"Any process that modulates the frequency, rate or extent of mitotic cell cycle phase transition.\" [GOC:mtg_cell_cycle, GOC:TermGenie, PMID:22841721]", "name": "regulation of mitotic cell cycle phase transition"}	9	9	0.349074	5.1356e-10	BRCA1,CCND1,CCND2,CDKN1A,HMGA2,PTEN,RB1,TP53,WEE1	1
regulation of myeloid cell differentiation	info:{"super-categories": "['regulation of cellular process', 'regulation of developmental process', 'regulation of immune system process', 'regulation of multicellular organismal process']", "namespace": "biological_process", "id": "GO:0045637", "def": "\"Any process that modulates the frequency, rate or extent of myeloid cell differentiation.\" [GOC:go_curators]", "name": "regulation of myeloid…	4	4	0.190404	6.88734e-05	HIF1A,MYC,RB1,STAT3	1
regulation of nervous system development	info:{"super-categories": "['regulation of developmental process', 'regulation of multicellular organismal process']", "namespace": "biological_process", "id": "GO:0051960", "def": "\"Any process that modulates the frequency, rate or extent of nervous system development, the origin and formation of nervous tissue.\" [GOC:ai]", "name": "regulation of nervous system development"}	5	5	0.777055	0.00103866	HIF1A,PTEN,STAT3,TP53,VEGFA	1
regulation of neural precursor cell proliferation	info:{"super-categories": "['regulation of cellular process']", "namespace": "biological_process", "id": "GO:2000177", "def": "\"Any process that modulates the frequency, rate or extent of neural precursor cell proliferation.\" [GOC:dph, GOC:yaf]", "name": "regulation of neural precursor cell proliferation"}	3	3	0.0694718	8.60067e-05	HIF1A,TP53,VEGFA	1
regulation of neuroblast proliferation	info:{"super-categories": "['regulation of cellular process', 'regulation of developmental process', 'regulation of multicellular organismal process']", "namespace": "biological_process", "id": "GO:1902692", "def": "\"Any process that modulates the frequency, rate or extent of neuroblast proliferation.\" [GO_REF:0000058, GOC:PARL, GOC:rl, GOC:TermGenie, PMID:21168496]", "name": "regulation of neu…	3	3	0.026588	7.94867e-06	HIF1A,TP53,VEGFA	1
regulation of neurogenesis	info:{"super-categories": "['regulation of cellular process', 'regulation of developmental process', 'regulation of multicellular organismal process']", "namespace": "biological_process", "id": "GO:0050767", "def": "\"Any process that modulates the frequency, rate or extent of neurogenesis, the generation of cells in the nervous system.\" [GOC:ai]", "name": "regulation of neurogenesis"}	5	5	0.690429	0.000654537	HIF1A,PTEN,STAT3,TP53,VEGFA	1
regulation of neuron apoptotic process	info:{"super-categories": "['regulation of cellular process']", "namespace": "biological_process", "id": "GO:0043523", "def": "\"Any process that modulates the occurrence or rate of cell death by apoptotic process in neurons.\" [GOC:go_curators, GOC:mtg_apoptosis]", "name": "regulation of neuron apoptotic process"}	3	3	0.178397	0.000961568	BCL2L11,HIF1A,TP53	1
regulation of neuron death	info:{"super-categories": "['regulation of cellular process']", "namespace": "biological_process", "id": "GO:1901214", "def": "\"Any process that modulates the frequency, rate or extent of neuron death.\" [GOC:rph, GOC:TermGenie]", "name": "regulation of neuron death"}	4	4	0.265022	0.000210785	BCL2L11,HIF1A,STAT3,TP53	1
regulation of nitrogen compound metabolic process	info:{"super-categories": "['regulation of metabolic process']", "namespace": "biological_process", "id": "GO:0051171", "def": "\"Any process that modulates the frequency, rate or extent of the chemical reactions and pathways involving nitrogen or nitrogenous compounds.\" [GOC:ai, GOC:tb]", "name": "regulation of nitrogen compound metabolic process"}	16	16	4.83729	1.75711e-07	BCL2L11,BRCA1,CCND1,CCND2,CDKN1A,CYLD,E2F3,HIF1A,HMGA2,MYC,PTEN,RB1,STAT3,TP53,VEGFA,XIAP	1
regulation of nucleic acid-templated transcription	info:{"super-categories": "['regulation of cellular process', 'regulation of metabolic process']", "namespace": "biological_process", "id": "GO:1903506", "def": "\"Any process that modulates the frequency, rate or extent of nucleic acid-templated transcription.\" [GO_REF:0000058, GOC:pr, GOC:TermGenie, GOC:txnOH, GOC:vw]", "name": "regulation of nucleic acid-templated transcription"}	14	14	2.90581	6.70079e-08	BRCA1,CCND1,CDKN1A,CYLD,E2F3,HIF1A,HMGA2,MYC,PTEN,RB1,STAT3,TP53,VEGFA,XIAP	1
regulation of organelle organization	info:{"super-categories": "['regulation of cellular process']", "namespace": "biological_process", "id": "GO:0033043", "def": "\"Any process that modulates the frequency, rate or extent of a process involved in the formation, arrangement of constituent parts, or disassembly of an organelle.\" [GOC:mah]", "name": "regulation of organelle organization"}	8	8	1.07295	1.13457e-05	BCL2L11,BRCA1,CYLD,HIF1A,MYC,RB1,TP53,VEGFA	1
regulation of peptidase activity	info:{"super-categories": "['regulation of catalytic activity', 'regulation of metabolic process']", "namespace": "biological_process", "id": "GO:0052547", "def": "\"Any process that modulates the frequency, rate or extent of peptidase activity, the hydrolysis of peptide bonds within proteins.\" [GOC:ai]", "name": "regulation of peptidase activity"}	5	5	0.369658	5.37803e-05	BCL2L11,MYC,STAT3,VEGFA,XIAP	1
regulation of peptidyl-tyrosine phosphorylation	info:{"super-categories": "['regulation of cellular process', 'regulation of metabolic process']", "namespace": "biological_process", "id": "GO:0050730", "def": "\"Any process that modulates the frequency, rate or extent of the phosphorylation of peptidyl-tyrosine.\" [GOC:ai]", "name": "regulation of peptidyl-tyrosine phosphorylation"}	3	3	0.216134	0.00153049	STAT3,TP53,VEGFA	1
regulation of phosphorus metabolic process	info:{"super-categories": "['regulation of cellular process', 'regulation of metabolic process']", "namespace": "biological_process", "id": "GO:0051174", "def": "\"Any process that modulates the frequency, rate or extent of the chemical reactions and pathways involving phosphorus or compounds containing phosphorus.\" [GOC:ai]", "name": "regulation of phosphorus metabolic process"}	12	12	1.50351	1.05371e-08	CCND1,CCND2,CDKN1A,CYLD,HIF1A,HMGA2,MYC,PTEN,RB1,STAT3,TP53,VEGFA	1
regulation of phosphorylation	info:{"super-categories": "['regulation of cellular process', 'regulation of metabolic process']", "namespace": "biological_process", "id": "GO:0042325", "def": "\"Any process that modulates the frequency, rate or extent of addition of phosphate groups into a molecule.\" [GOC:jl]", "name": "regulation of phosphorylation"}	12	12	1.33883	3.83068e-09	CCND1,CCND2,CDKN1A,CYLD,HIF1A,HMGA2,MYC,PTEN,RB1,STAT3,TP53,VEGFA	1
regulation of plasma membrane bounded cell projection organization	info:{"super-categories": "['regulation of cellular process']", "namespace": "biological_process", "id": "GO:0120035", "def": "\"Any process that modulates the frequency, rate or extent of a process involved in the formation, arrangement of constituent parts, or disassembly of plasma membrane bounded cell projections.\" [GOC:krc]", "name": "regulation of plasma membrane bounded cell projection or…	3	3	0.568639	0.0192585	CYLD,PTEN,VEGFA	1
regulation of programmed cell death	info:{"super-categories": "['regulation of cellular process']", "namespace": "biological_process", "id": "GO:0043067", "def": "\"Any process that modulates the frequency, rate or extent of programmed cell death, cell death resulting from activation of endogenous cellular processes.\" [GOC:jl]", "name": "regulation of programmed cell death"}	15	15	1.32168	4.35029e-13	BCL2L11,BRCA1,CCND2,CDKN1A,CYLD,E2F3,HIF1A,HMGA2,MYC,PTEN,RB1,STAT3,TP53,VEGFA,XIAP	1
regulation of protein complex assembly	info:{"super-categories": "['regulation of cellular component biogenesis', 'regulation of cellular process']", "namespace": "biological_process", "id": "GO:0043254", "def": "\"Any process that modulates the frequency, rate or extent of protein complex assembly.\" [GOC:jl]", "name": "regulation of protein complex assembly"}	4	4	0.36537	0.000592793	BCL2L11,RB1,TP53,VEGFA	1
regulation of protein kinase activity	info:{"super-categories": "['regulation of catalytic activity', 'regulation of cellular process', 'regulation of metabolic process']", "namespace": "biological_process", "id": "GO:0045859", "def": "\"Any process that modulates the frequency, rate or extent of protein kinase activity.\" [GOC:go_curators]", "name": "regulation of protein kinase activity"}	7	7	0.662984	6.70732e-06	CCND1,CCND2,CDKN1A,HMGA2,PTEN,RB1,VEGFA	1
regulation of protein localization	info:{"super-categories": "['regulation of localization']", "namespace": "biological_process", "id": "GO:0032880", "def": "\"Any process that modulates the frequency, rate or extent of any process in which a protein is transported to, or maintained in, a specific location.\" [GOC:dph, GOC:mah, GOC:tb]", "name": "regulation of protein localization"}	4	4	0.861965	0.0101676	CYLD,HIF1A,RB1,TP53	1
regulation of protein metabolic process	info:{"super-categories": "['regulation of metabolic process']", "namespace": "biological_process", "id": "GO:0051246", "def": "\"Any process that modulates the frequency, rate or extent of the chemical reactions and pathways involving a protein.\" [GOC:ai]", "name": "regulation of protein metabolic process"}	14	14	2.34231	5.71559e-09	BCL2L11,BRCA1,CCND1,CCND2,CDKN1A,CYLD,HMGA2,MYC,PTEN,RB1,STAT3,TP53,VEGFA,XIAP	1
regulation of protein phosphorylation	info:{"super-categories": "['regulation of cellular process', 'regulation of metabolic process']", "namespace": "biological_process", "id": "GO:0001932", "def": "\"Any process that modulates the frequency, rate or extent of addition of phosphate groups into an amino acid in a protein.\" [GOC:hjd]", "name": "regulation of protein phosphorylation"}	11	11	1.21361	2.06416e-08	CCND1,CCND2,CDKN1A,CYLD,HMGA2,MYC,PTEN,RB1,STAT3,TP53,VEGFA	1
regulation of protein serine/threonine kinase activity	info:{"super-categories": "['regulation of catalytic activity', 'regulation of cellular process', 'regulation of metabolic process']", "namespace": "biological_process", "id": "GO:0071900", "def": "\"Any process that modulates the rate, frequency, or extent of protein serine/threonine kinase activity.\" [GOC:mah]", "name": "regulation of protein serine/threonine kinase activity"}	7	7	0.430553	6.36616e-07	CCND1,CCND2,CDKN1A,HMGA2,PTEN,RB1,VEGFA	1
regulation of protein stability	info:{"super-categories": "[]", "namespace": "biological_process", "id": "GO:0031647", "def": "\"Any process that affects the structure and integrity of a protein, altering the likelihood of its degradation or aggregation.\" [GOC:dph, GOC:mah, GOC:tb]", "name": "regulation of protein stability"}	3	3	0.238434	0.00198015	CDKN1A,PTEN,TP53	1
regulation of protein ubiquitination	info:{"super-categories": "['regulation of cellular process', 'regulation of metabolic process']", "namespace": "biological_process", "id": "GO:0031396", "def": "\"Any process that modulates the frequency, rate or extent of the addition of ubiquitin groups to a protein.\" [GOC:mah]", "name": "regulation of protein ubiquitination"}	3	3	0.170678	0.000854173	BRCA1,PTEN,XIAP	1
regulation of proteolysis	info:{"super-categories": "['regulation of metabolic process']", "namespace": "biological_process", "id": "GO:0030162", "def": "\"Any process that modulates the frequency, rate or extent of the hydrolysis of a peptide bond or bonds within a protein.\" [GOC:mah]", "name": "regulation of proteolysis"}	7	7	0.607235	4.25305e-06	BCL2L11,MYC,PTEN,STAT3,TP53,VEGFA,XIAP	1
regulation of reactive oxygen species metabolic process	info:{"super-categories": "['regulation of cellular process', 'regulation of metabolic process']", "namespace": "biological_process", "id": "GO:2000377", "def": "\"Any process that modulates the frequency, rate or extent of reactive oxygen species metabolic process.\" [GOC:mah]", "name": "regulation of reactive oxygen species metabolic process"}	5	5	0.151809	1.48945e-06	BRCA1,CDKN1A,HIF1A,STAT3,TP53	1
regulation of response to DNA damage stimulus	info:{"super-categories": "['regulation of cellular process', 'regulation of response to stimulus']", "namespace": "biological_process", "id": "GO:2001020", "def": "\"Any process that modulates the frequency, rate or extent of response to DNA damage stimulus.\" [GOC:obol]", "name": "regulation of response to DNA damage stimulus"}	4	4	0.1844	6.2698e-05	BRCA1,HMGA2,MYC,TP53	1
regulation of signal transduction	info:{"super-categories": "['regulation of cellular process', 'regulation of response to stimulus', 'regulation of signaling']", "namespace": "biological_process", "id": "GO:0009966", "def": "\"Any process that modulates the frequency, rate or extent of signal transduction.\" [GOC:sm]", "name": "regulation of signal transduction"}	11	11	2.63135	1.70724e-05	BCL2L11,BRCA1,CYLD,HIF1A,MYC,PTEN,RB1,STAT3,TP53,VEGFA,XIAP	1
regulation of signaling	info:{"super-categories": "[]", "namespace": "biological_process", "id": "GO:0023051", "def": "\"Any process that modulates the frequency, rate or extent of a signaling process.\" [GOC:mtg_signal]", "name": "regulation of signaling"}	11	11	2.99329	5.00957e-05	BCL2L11,BRCA1,CYLD,HIF1A,MYC,PTEN,RB1,STAT3,TP53,VEGFA,XIAP	1
regulation of smooth muscle cell proliferation	info:{"super-categories": "['regulation of cellular process']", "namespace": "biological_process", "id": "GO:0048660", "def": "\"Any process that modulates the frequency, rate or extent of smooth muscle cell proliferation.\" [CL:0000192, GOC:ebc]", "name": "regulation of smooth muscle cell proliferation"}	3	3	0.114929	0.00031659	CDKN1A,PTEN,TP53	1
regulation of stem cell proliferation	info:{"super-categories": "['regulation of cellular process']", "namespace": "biological_process", "id": "GO:0072091", "def": "\"Any process that modulates the frequency, rate or extent of stem cell proliferation. A stem cell is a cell that retains the ability to divide and proliferate throughout life to provide progenitor cells that can differentiate into specialized cells.\" [GOC:mtg_kidney_jan…	4	4	0.055749	1.23161e-06	HIF1A,HMGA2,TP53,VEGFA	1
regulation of stress-activated MAPK cascade	info:{"super-categories": "['regulation of cellular process', 'regulation of metabolic process', 'regulation of response to stimulus', 'regulation of signaling']", "namespace": "biological_process", "id": "GO:0032872", "def": "\"Any process that modulates the frequency, rate or extent of signal transduction mediated by the stress-activated MAPK cascade.\" [GOC:mah]", "name": "regulation of stress…	3	3	0.198123	0.00122858	CYLD,MYC,VEGFA	1
regulation of stress-activated protein kinase signaling cascade	info:{"super-categories": "['regulation of cellular process', 'regulation of response to stimulus', 'regulation of signaling']", "namespace": "biological_process", "id": "GO:0070302", "def": "\"Any process that modulates the frequency, rate or extent of signaling via a stress-activated protein kinase signaling cascade.\" [GOC:mah]", "name": "regulation of stress-activated protein kinase signaling…	3	3	0.200696	0.0012672	CYLD,MYC,VEGFA	1
regulation of transcription by RNA polymerase II	info:{"super-categories": "['regulation of cellular process', 'regulation of metabolic process']", "namespace": "biological_process", "id": "GO:0006357", "def": "\"Any process that modulates the frequency, rate or extent of transcription mediated by RNA polymerase II.\" [GOC:go_curators, GOC:txnOH]", "name": "regulation of transcription by RNA polymerase II"}	12	12	1.92034	1.28922e-07	BRCA1,CCND1,CDKN1A,E2F3,HIF1A,HMGA2,MYC,RB1,STAT3,TP53,VEGFA,XIAP	1
regulation of transcription from RNA polymerase II promoter in response to hypoxia	info:{"super-categories": "['cellular response to stress', 'regulation of cellular process', 'regulation of metabolic process']", "namespace": "biological_process", "id": "GO:0061418", "def": "\"Any process that modulates the frequency, rate or extent of transcription from an RNA polymerase II promoter as a result of a hypoxia stimulus.\" [GOC:dph, PMID:12511571]", "name": "regulation of transcri…	3	3	0.0660411	7.65077e-05	HIF1A,TP53,VEGFA	1
regulation of transcription from RNA polymerase II promoter in response to stress	info:{"super-categories": "['cellular response to stress', 'regulation of cellular process', 'regulation of metabolic process']", "namespace": "biological_process", "id": "GO:0043618", "def": "\"Any process that modulates the frequency, rate or extent of transcription from an RNA polymerase II promoter as a result of a stimulus indicating the organism is under stress. The stress is usually, but n…	3	3	0.100348	0.000225383	HIF1A,TP53,VEGFA	1
regulation of transcription, DNA-templated	info:{"super-categories": "['regulation of cellular process', 'regulation of metabolic process']", "namespace": "biological_process", "id": "GO:0006355", "def": "\"Any process that modulates the frequency, rate or extent of cellular DNA-templated transcription.\" [GOC:go_curators, GOC:txnOH]", "name": "regulation of transcription, DNA-templated"}	14	14	2.85778	5.49276e-08	BRCA1,CCND1,CDKN1A,CYLD,E2F3,HIF1A,HMGA2,MYC,PTEN,RB1,STAT3,TP53,VEGFA,XIAP	1
regulation of vasculature development	info:{"super-categories": "['regulation of developmental process', 'regulation of multicellular organismal process']", "namespace": "biological_process", "id": "GO:1901342", "def": "\"Any process that modulates the frequency, rate or extent of vasculature development.\" [GOC:TermGenie]", "name": "regulation of vasculature development"}	5	5	0.272741	1.59581e-05	BRCA1,HIF1A,HMGA2,STAT3,VEGFA	1
reproductive process	info:{"super-categories": "[]", "namespace": "biological_process", "id": "GO:0022414", "def": "\"A biological process that directly contributes to the process of producing new individuals by one or two organisms. The new individuals inherit some proportion of their genetic material from the parent or parents.\" [GOC:dph, GOC:isa_complete]", "name": "reproductive process"}	6	6	1.19389	0.00102152	BCL2L11,CCND1,HIF1A,PTEN,STAT3,VEGFA	1
response to UV	info:{"super-categories": "['response to radiation']", "namespace": "biological_process", "id": "GO:0009411", "def": "\"Any process that results in a change in state or activity of a cell or an organism (in terms of movement, secretion, enzyme production, gene expression, etc.) as a result of an ultraviolet radiation (UV light) stimulus. Ultraviolet radiation is electromagnetic radiation with a w…	4	4	0.116644	1.423e-05	CCND1,CDKN1A,MYC,TP53	1
response to X-ray	info:{"super-categories": "['response to radiation']", "namespace": "biological_process", "id": "GO:0010165", "def": "\"Any process that results in a change in state or activity of a cell or an organism (in terms of movement, secretion, enzyme production, gene expression, etc.) as a result of X-ray radiation. An X-ray is a form of electromagnetic radiation with a wavelength in the range of 10 nan…	3	3	0.0257303	7.36744e-06	CCND1,CDKN1A,TP53	1
response to alcohol	info:{"super-categories": "['response to organic substance', 'response to oxygen-containing compound']", "namespace": "biological_process", "id": "GO:0097305", "def": "\"Any process that results in a change in state or activity of a cell or an organism (in terms of movement, secretion, enzyme production, gene expression, etc.) as a result of an alcohol stimulus.\" [CHEBI:30879, GOC:pr]", "name": …	6	6	0.188689	1.60438e-07	BRCA1,CCND1,CDKN1A,PTEN,STAT3,TP53	1
response to antibiotic	info:{"super-categories": "[]", "namespace": "biological_process", "id": "GO:0046677", "def": "\"Any process that results in a change in state or activity of a cell or an organism (in terms of movement, secretion, enzyme production, gene expression, etc.) as a result of an antibiotic stimulus. An antibiotic is a chemical substance produced by a microorganism which has the capacity to inhibit the …	4	4	0.247011	0.00016493	CCND1,PTEN,STAT3,TP53	1
response to corticosteroid	info:{"super-categories": "['response to hormone', 'response to organic substance']", "namespace": "biological_process", "id": "GO:0031960", "def": "\"Any process that results in a change in state or activity of a cell or an organism (in terms of movement, secretion, enzyme production, gene expression, etc.) as a result of a corticosteroid hormone stimulus. A corticosteroid is a steroid hormone t…	3	3	0.138086	0.000500773	BCL2L11,CCND1,CDKN1A	1
response to cytokine	info:{"super-categories": "['response to organic substance']", "namespace": "biological_process", "id": "GO:0034097", "def": "\"Any process that results in a change in state or activity of a cell or an organism (in terms of movement, secretion, enzyme production, gene expression, etc.) as a result of a cytokine stimulus.\" [GOC:sl]", "name": "response to cytokine"}	3	3	0.482872	0.0126241	BRCA1,HIF1A,STAT3	1
response to drug	info:{"super-categories": "[]", "namespace": "biological_process", "id": "GO:0042493", "def": "\"Any process that results in a change in state or activity of a cell or an organism (in terms of movement, secretion, enzyme production, gene expression, etc.) as a result of a drug stimulus. A drug is a substance used in the diagnosis, treatment or prevention of a disease.\" [GOC:jl]", "name": "respon…	7	7	0.662126	6.70732e-06	BRCA1,CCND1,CDKN1A,MYC,PTEN,STAT3,TP53	1
response to endoplasmic reticulum stress	info:{"super-categories": "['cellular response to stress']", "namespace": "biological_process", "id": "GO:0034976", "def": "\"Any process that results in a change in state or activity of a cell (in terms of movement, secretion, enzyme production, gene expression, etc.) as a result of a stress acting at the endoplasmic reticulum. ER stress usually results from the accumulation of unfolded or misfo…	3	3	0.211846	0.00144912	BCL2L11,CCND1,TP53	1
response to estradiol	info:{"super-categories": "['response to hormone', 'response to organic substance', 'response to oxygen-containing compound']", "namespace": "biological_process", "id": "GO:0032355", "def": "\"Any process that results in a change in state or activity of a cell or an organism (in terms of movement, secretion, enzyme production, gene expression, etc.) as a result of stimulus by estradiol, a C18 ste…	4	4	0.115786	1.4025e-05	BCL2L11,CCND1,PTEN,STAT3	1
response to ethanol	info:{"super-categories": "['response to antibiotic', 'response to drug', 'response to organic substance', 'response to oxygen-containing compound', 'response to toxic substance']", "namespace": "biological_process", "id": "GO:0045471", "def": "\"Any process that results in a change in state or activity of a cell or an organism (in terms of movement, secretion, enzyme production, gene expression,…	4	4	0.100348	8.6417e-06	CCND1,PTEN,STAT3,TP53	1
response to external biotic stimulus	info:{"super-categories": "[]", "namespace": "biological_process", "id": "GO:0043207", "def": "\"Any process that results in a change in state or activity of a cell or an organism (in terms of movement, secretion, enzyme production, gene expression, etc.) as a result of an external biotic stimulus, an external stimulus caused by, or produced by living things.\" [GOC:go_curators]", "name": "respon…	3	3	0.924575	0.0629072	BCL2L11,CYLD,HMGA2	1
response to extracellular stimulus	info:{"super-categories": "[]", "namespace": "biological_process", "id": "GO:0009991", "def": "\"Any process that results in a change in state or activity of a cell or an organism (in terms of movement, secretion, enzyme production, gene expression, etc.) as a result of an extracellular stimulus.\" [GOC:go_curators]", "name": "response to extracellular stimulus"}	4	4	0.4134	0.000887243	CCND1,CDKN1A,PTEN,TP53	1
response to gamma radiation	info:{"super-categories": "['response to radiation']", "namespace": "biological_process", "id": "GO:0010332", "def": "\"Any process that results in a change in state or activity of a cell or an organism (in terms of movement, secretion, enzyme production, gene expression, etc.) as a result of a gamma radiation stimulus. Gamma radiation is a form of electromagnetic radiation (EMR) or light emissio…	3	3	0.0480299	3.43477e-05	CDKN1A,MYC,TP53	1
response to glucocorticoid	info:{"super-categories": "['response to hormone', 'response to organic substance']", "namespace": "biological_process", "id": "GO:0051384", "def": "\"Any process that results in a change in state or activity of a cell or an organism (in terms of movement, secretion, enzyme production, gene expression, etc.) as a result of a glucocorticoid stimulus. Glucocorticoids are hormonal C21 corticosteroid…	3	3	0.124363	0.000380866	BCL2L11,CCND1,CDKN1A	1
response to growth factor	info:{"super-categories": "['response to organic substance']", "namespace": "biological_process", "id": "GO:0070848", "def": "\"Any process that results in a change in state or activity of a cell or an organism (in terms of movement, secretion, enzyme production, gene expression, etc.) as a result of a growth factor stimulus.\" [GOC:BHF, GOC:mah]", "name": "response to growth factor"}	3	3	0.260734	0.00248894	MYC,PTEN,VEGFA	1
response to hormone	info:{"super-categories": "['response to organic substance']", "namespace": "biological_process", "id": "GO:0009725", "def": "\"Any process that results in a change in state or activity of a cell or an organism (in terms of movement, secretion, enzyme production, gene expression, etc.) as a result of a hormone stimulus.\" [GOC:jl]", "name": "response to hormone"}	5	5	0.584935	0.000334532	BCL2L11,CCND1,CDKN1A,PTEN,STAT3	1
response to hypoxia	info:{"super-categories": "['response to oxygen levels']", "namespace": "biological_process", "id": "GO:0001666", "def": "\"Any process that results in a change in state or activity of a cell or an organism (in terms of movement, secretion, enzyme production, gene expression, etc.) as a result of a stimulus indicating lowered oxygen tension. Hypoxia, defined as a decline in O2 levels below normox…	5	5	0.231573	8.30861e-06	HIF1A,MYC,PTEN,TP53,VEGFA	1
response to inorganic substance	info:{"super-categories": "[]", "namespace": "biological_process", "id": "GO:0010035", "def": "\"Any process that results in a change in state or activity of a cell or an organism (in terms of movement, secretion, enzyme production, gene expression, etc.) as a result of an inorganic substance stimulus.\" [GOC:sm]", "name": "response to inorganic substance"}	4	4	0.439988	0.00108062	CCND1,HIF1A,PTEN,TP53	1
response to ionizing radiation	info:{"super-categories": "['response to radiation']", "namespace": "biological_process", "id": "GO:0010212", "def": "\"Any process that results in a change in state or activity of a cell or an organism (in terms of movement, secretion, enzyme production, gene expression, etc.) as a result of a ionizing radiation stimulus. Ionizing radiation is radiation with sufficient energy to remove electrons…	5	5	0.122648	6.54808e-07	BRCA1,CCND1,CDKN1A,MYC,TP53	1
response to leptin	info:{"super-categories": "['response to hormone', 'response to organic substance']", "namespace": "biological_process", "id": "GO:0044321", "def": "\"Any process that results in a change in state or activity of a cell or an organism (in terms of movement, secretion, enzyme production, gene expression, etc.) as a result of a leptin stimulus. Leptin is a hormone manufactured primarily in the adipo…	3	3	0.0137228	1.44348e-06	CCND1,PTEN,STAT3	1
response to light stimulus	info:{"super-categories": "['response to radiation']", "namespace": "biological_process", "id": "GO:0009416", "def": "\"Any process that results in a change in state or activity of a cell or an organism (in terms of movement, secretion, enzyme production, gene expression, etc.) as a result of a light stimulus, electromagnetic radiation of wavelengths classified as infrared, visible or ultraviolet…	5	5	0.250441	1.13457e-05	CCND1,CDKN1A,HIF1A,MYC,TP53	1
response to lipid	info:{"super-categories": "['response to organic substance']", "namespace": "biological_process", "id": "GO:0033993", "def": "\"Any process that results in a change in state or activity of a cell or an organism (in terms of movement, secretion, enzyme production, gene expression, etc.) as a result of a lipid stimulus.\" [GOC:sl]", "name": "response to lipid"}	6	6	0.654407	6.05565e-05	BCL2L11,CCND1,CDKN1A,PTEN,STAT3,TP53	1
response to metal ion	info:{"super-categories": "['response to inorganic substance']", "namespace": "biological_process", "id": "GO:0010038", "def": "\"Any process that results in a change in state or activity of a cell or an organism (in terms of movement, secretion, enzyme production, gene expression, etc.) as a result of a metal ion stimulus.\" [GOC:sm]", "name": "response to metal ion"}	4	4	0.30619	0.000329793	CCND1,HIF1A,PTEN,TP53	1
response to nitrogen compound	info:{"super-categories": "[]", "namespace": "biological_process", "id": "GO:1901698", "def": "\"Any process that results in a change in state or activity of a cell or an organism (in terms of movement, secretion, enzyme production, gene expression, etc.) as a result of a nitrogen compound stimulus.\" [GOC:pr, GOC:TermGenie]", "name": "response to nitrogen compound"}	7	7	0.759901	1.4025e-05	BCL2L11,BRCA1,CCND1,CDKN1A,PTEN,STAT3,TP53	1
response to nutrient	info:{"super-categories": "['response to extracellular stimulus']", "namespace": "biological_process", "id": "GO:0007584", "def": "\"Any process that results in a change in state or activity of a cell or an organism (in terms of movement, secretion, enzyme production, gene expression, etc.) as a result of a nutrient stimulus.\" [GOC:go_curators]", "name": "response to nutrient"}	3	3	0.180112	0.000982048	CCND1,PTEN,TP53	1
response to nutrient levels	info:{"super-categories": "['response to extracellular stimulus']", "namespace": "biological_process", "id": "GO:0031667", "def": "\"Any process that results in a change in state or activity of a cell or an organism (in terms of movement, secretion, enzyme production, gene expression, etc.) as a result of a stimulus reflecting the presence, absence, or concentration of nutrients.\" [GOC:mah]", "n…	4	4	0.389385	0.000731917	CCND1,CDKN1A,PTEN,TP53	1
response to organic cyclic compound	info:{"super-categories": "['response to organic substance']", "namespace": "biological_process", "id": "GO:0014070", "def": "\"Any process that results in a change in state or activity of a cell or an organism (in terms of movement, secretion, enzyme production, gene expression, etc.) as a result of an organic cyclic compound stimulus.\" [CHEBI:33832, GOC:ef]", "name": "response to organic cycli…	7	7	0.644115	5.68137e-06	BCL2L11,BRCA1,CCND1,CDKN1A,PTEN,STAT3,TP53	1
response to organic substance	info:{"super-categories": "[]", "namespace": "biological_process", "id": "GO:0010033", "def": "\"Any process that results in a change in state or activity of a cell or an organism (in terms of movement, secretion, enzyme production, gene expression, etc.) as a result of an organic substance stimulus.\" [GOC:sm]", "name": "response to organic substance"}	10	10	1.84743	7.41257e-06	BCL2L11,BRCA1,CCND1,CDKN1A,HIF1A,MYC,PTEN,STAT3,TP53,VEGFA	1
response to organonitrogen compound	info:{"super-categories": "['response to nitrogen compound', 'response to organic substance']", "namespace": "biological_process", "id": "GO:0010243", "def": "\"Any process that results in a change in state or activity of a cell or an organism (in terms of movement, secretion, enzyme production, gene expression, etc.) as a result of an organonitrogen stimulus. An organonitrogen compound is formal…	7	7	0.70501	9.20605e-06	BCL2L11,BRCA1,CCND1,CDKN1A,PTEN,STAT3,TP53	1
response to other organism	info:{"super-categories": "['response to external biotic stimulus']", "namespace": "biological_process", "id": "GO:0051707", "def": "\"Any process that results in a change in state or activity of a cell or an organism (in terms of movement, secretion, enzyme production, gene expression, etc.) as a result of a stimulus from another living organism.\" [GOC:ai]", "name": "response to other organism"}	3	3	0.749609	0.0379921	BCL2L11,CYLD,HMGA2	1
response to peptide	info:{"super-categories": "['response to nitrogen compound', 'response to organic substance', 'response to oxygen-containing compound']", "namespace": "biological_process", "id": "GO:1901652", "def": "\"Any process that results in a change in state or activity of a cell or an organism (in terms of movement, secretion, enzyme production, gene expression, etc.) as a result of a peptide stimulus.\" …	4	4	0.322486	0.000390158	BCL2L11,PTEN,STAT3,TP53	1
response to radiation	info:{"super-categories": "[]", "namespace": "biological_process", "id": "GO:0009314", "def": "\"Any process that results in a change in state or activity of a cell or an organism (in terms of movement, secretion, enzyme production, gene expression, etc.) as a result of an electromagnetic radiation stimulus. Electromagnetic radiation is a propagating wave in space with electric and magnetic compo…	6	6	0.361939	3.83686e-06	BRCA1,CCND1,CDKN1A,HIF1A,MYC,TP53	1
response to steroid hormone	info:{"super-categories": "['response to hormone', 'response to organic substance']", "namespace": "biological_process", "id": "GO:0048545", "def": "\"Any process that results in a change in state or activity of a cell or an organism (in terms of movement, secretion, enzyme production, gene expression, etc.) as a result of a steroid hormone stimulus.\" [GOC:go_curators]", "name": "response to ste…	3	3	0.191262	0.00112738	BCL2L11,CCND1,CDKN1A	1
response to stimulus	info:{"super-categories": "[]", "namespace": "biological_process", "id": "GO:0050896", "def": "\"Any process that results in a change in state or activity of a cell or an organism (in terms of movement, secretion, enzyme production, gene expression, etc.) as a result of a stimulus. The process begins with detection of the stimulus and ends with a change in state or activity or the cell or organis…	14	14	4.60315	1.04478e-05	BCL2L11,BRCA1,CCND1,CDKN1A,CYLD,HIF1A,HMGA2,MYC,PTEN,RB1,STAT3,TP53,VEGFA,XIAP	1
response to toxic substance	info:{"super-categories": "[]", "namespace": "biological_process", "id": "GO:0009636", "def": "\"Any process that results in a change in state or activity of a cell or an organism (in terms of movement, secretion, enzyme production, gene expression, etc.) as a result of a toxic stimulus.\" [GOC:lr]", "name": "response to toxic substance"}	5	5	0.331921	3.43477e-05	CCND1,CDKN1A,PTEN,STAT3,TP53	1
secretion	info:{"super-categories": "['transport']", "namespace": "biological_process", "id": "GO:0046903", "def": "\"The controlled release of a substance by a cell or a tissue.\" [GOC:ai]", "name": "secretion"}	3	3	0.923717	0.0629072	CCND1,HIF1A,VEGFA	1
signal transduction	info:{"super-categories": "['regulation of cellular process']", "namespace": "biological_process", "id": "GO:0007165", "def": "\"The cellular process in which a signal is conveyed to trigger a change in the activity or state of a cell. Signal transduction begins with reception of a signal (e.g. a ligand binding to a receptor or receptor activation by a stimulus such as light), or for signal trans…	13	13	4.03708	1.86197e-05	BCL2L11,BRCA1,CCND1,CDKN1A,CYLD,HIF1A,MYC,PTEN,RB1,STAT3,TP53,VEGFA,XIAP	1
signal transduction by p53 class mediator	info:{"super-categories": "['intracellular signal transduction', 'regulation of cellular process']", "namespace": "biological_process", "id": "GO:0072331", "def": "\"An intracellular signaling process that is induced by the cell cycle regulator phosphoprotein p53 or an equivalent protein.\" [GOC:mah]", "name": "signal transduction by p53 class mediator"}	3	3	0.101206	0.000229181	BRCA1,CDKN1A,TP53	1
signal transduction in response to DNA damage	info:{"super-categories": "['cellular response to stress', 'intracellular signal transduction', 'regulation of cellular process']", "namespace": "biological_process", "id": "GO:0042770", "def": "\"A cascade of processes induced by the detection of DNA damage within a cell.\" [GOC:go_curators]", "name": "signal transduction in response to DNA damage"}	3	3	0.087483	0.000158773	BRCA1,CDKN1A,TP53	1
signal transduction involved in DNA damage checkpoint	info:{"super-categories": "['cellular response to stress', 'intracellular signal transduction', 'regulation of cellular process']", "namespace": "biological_process", "id": "GO:0072422", "def": "\"A signal transduction process that contributes to a DNA damage checkpoint.\" [GOC:mah]", "name": "signal transduction involved in DNA damage checkpoint"}	3	3	0.060895	6.28246e-05	BRCA1,CDKN1A,TP53	1
signal transduction involved in cell cycle checkpoint	info:{"super-categories": "['intracellular signal transduction', 'regulation of cellular process']", "namespace": "biological_process", "id": "GO:0072395", "def": "\"A signal transduction process that contributes to a cell cycle checkpoint.\" [GOC:mtg_cell_cycle]", "name": "signal transduction involved in cell cycle checkpoint"}	3	3	0.0617527	6.45932e-05	BRCA1,CDKN1A,TP53	1
small GTPase mediated signal transduction	info:{"super-categories": "['intracellular signal transduction', 'regulation of cellular process']", "namespace": "biological_process", "id": "GO:0007264", "def": "\"Any series of molecular signals in which a small monomeric GTPase relays one or more of the signals.\" [GOC:mah]", "name": "small GTPase mediated signal transduction"}	3	3	0.266737	0.00263249	CDKN1A,RB1,TP53	1
small molecule metabolic process	info:{"super-categories": "[]", "namespace": "biological_process", "id": "GO:0044281", "def": "\"The chemical reactions and pathways involving small molecules, any low molecular weight, monomeric, non-encoded molecule.\" [GOC:curators, GOC:pde, GOC:vw]", "name": "small molecule metabolic process"}	3	3	1.42975	0.16801	BRCA1,HIF1A,PTEN	1
tissue development	info:{"super-categories": "[]", "namespace": "biological_process", "id": "GO:0009888", "def": "\"The process whose specific outcome is the progression of a tissue over time, from its formation to the mature structure.\" [ISBN:0471245208]", "name": "tissue development"}	4	4	0.537763	0.0020846	CDKN1A,PTEN,TP53,VEGFA	1
tissue morphogenesis	info:{"super-categories": "[]", "namespace": "biological_process", "id": "GO:0048729", "def": "\"The process in which the anatomical structures of a tissue are generated and organized.\" [GOC:dph, GOC:jid]", "name": "tissue morphogenesis"}	3	3	0.325917	0.00449437	HIF1A,MYC,VEGFA	1
transcription initiation from RNA polymerase II promoter	info:{"super-categories": "['cellular aromatic compound metabolic process', 'cellular biosynthetic process', 'cellular nitrogen compound metabolic process', 'heterocycle metabolic process', 'macromolecule metabolic process', 'nucleobase-containing compound metabolic process', 'organic cyclic compound metabolic process', 'organic substance biosynthetic process']", "namespace": "biological_process"…	4	4	0.138086	2.40602e-05	CCND1,CDKN1A,E2F3,PTEN	1
transcription, DNA-templated	info:{"super-categories": "['cellular aromatic compound metabolic process', 'cellular biosynthetic process', 'cellular macromolecule metabolic process', 'cellular nitrogen compound metabolic process', 'heterocycle metabolic process', 'macromolecule metabolic process', 'nucleobase-containing compound metabolic process', 'organic cyclic compound metabolic process', 'organic substance biosynthetic p…	3	3	0.385097	0.00701822	HIF1A,STAT3,TP53	1
transmembrane receptor protein tyrosine kinase signaling pathway	info:{"super-categories": "['cell surface receptor signaling pathway', 'regulation of cellular process']", "namespace": "biological_process", "id": "GO:0007169", "def": "\"A series of molecular signals initiated by the binding of an extracellular ligand to a receptor on the surface of the target cell where the receptor possesses tyrosine kinase activity, and ending with regulation of a downstream…	3	3	0.427123	0.0092344	PTEN,STAT3,VEGFA	1
transport	info:{"super-categories": "[]", "namespace": "biological_process", "id": "GO:0006810", "def": "\"The directed movement of substances (such as macromolecules, small molecules, ions) or cellular components (such as complexes and organelles) into, out of or within a cell, or between cells, or within a multicellular organism by means of some agent such as a transporter, pore or motor protein.\" [GOC:…	7	7	3.56364	0.0487977	CCND1,CDKN1A,HIF1A,MYC,STAT3,TP53,VEGFA	1
tube morphogenesis	info:{"super-categories": "[]", "namespace": "biological_process", "id": "GO:0035239", "def": "\"The process in which the anatomical structures of a tube are generated and organized. Epithelial and endothelial tubes transport gases, liquids and cells from one site to another and form the basic structure of many organs and tissues, with tube shape and organization varying from the single-celled ex…	3	3	0.233288	0.00186676	HIF1A,MYC,VEGFA	1
viral process	info:{"super-categories": "['symbiotic process']", "namespace": "biological_process", "id": "GO:0016032", "def": "\"A multi-organism process in which a virus is a participant. The other participant is the host. Includes infection of a host cell, replication of the viral genome, and assembly of progeny virus particles. In some cases the viral genetic material may integrate into the host genome and…	4	4	0.520609	0.00186676	BCL2L11,RB1,STAT3,TP53	1

## Sheet: Molecular function
#Name	Reference	Hits	Score	Expected Score	P-value	Info	Regulation_direction
DNA binding	info:{"super-categories": "['nucleic acid binding']", "namespace": "molecular_function", "id": "GO:0003677", "def": "\"Any molecular function by which a gene product interacts selectively and non-covalently with DNA (deoxyribonucleic acid).\" [GOC:dph, GOC:jl, GOC:tb, GOC:vw]", "name": "DNA binding"}	8	8	2.07729	0.000655761	BRCA1,E2F3,HIF1A,HMGA2,MYC,RB1,STAT3,TP53	1
DNA-binding transcription activator activity	info:{"super-categories": "[]", "namespace": "molecular_function", "id": "GO:0001216", "def": "\"Interacting selectively and non-covalently with a specific DNA sequence in order to activate or increase the frequency, rate or extent of transcription by a RNA polymerase.\" [GOC:krc]", "name": "DNA-binding transcription activator activity"}	6	6	0.362797	6.00944e-06	E2F3,HIF1A,HMGA2,MYC,STAT3,TP53	1
DNA-binding transcription activator activity, RNA polymerase II-specific	info:{"super-categories": "['DNA-binding transcription activator activity', 'DNA-binding transcription factor activity, RNA polymerase II-specific']", "namespace": "molecular_function", "id": "GO:0001228", "def": "\"A protein or a member of a complex that interacts selectively and non-covalently with a specific DNA sequence (sometimes referred to as a motif) within the regulatory region of a RNA …	6	6	0.361939	6.00944e-06	E2F3,HIF1A,HMGA2,MYC,STAT3,TP53	1
DNA-binding transcription factor activity	info:{"super-categories": "[]", "namespace": "molecular_function", "id": "GO:0003700", "def": "\"A protein or a member of a complex that interacts selectively and non-covalently with a specific DNA sequence (sometimes referred to as a motif) within the regulatory region of a gene to modulate transcription. Regulatory regions include promoters (proximal and distal) and enhancers. Genes are transcr…	7	7	1.13213	0.000136011	E2F3,HIF1A,HMGA2,MYC,RB1,STAT3,TP53	1
DNA-binding transcription factor activity, RNA polymerase II-specific	info:{"super-categories": "[]", "namespace": "molecular_function", "id": "GO:0000981", "def": "\"A protein or a member of a complex that interacts selectively and non-covalently with a specific DNA sequence (sometimes referred to as a motif) within the regulatory region of a RNA polymerase II-transcribed gene to modulate transcription. Regulatory regions include promoters (proximal and distal) an…	6	6	0.934009	0.000344495	E2F3,HIF1A,HMGA2,MYC,STAT3,TP53	1
RNA polymerase II proximal promoter sequence-specific DNA binding	info:{"super-categories": "['nucleic acid binding']", "namespace": "molecular_function", "id": "GO:0000978", "def": "\"Interacting selectively and non-covalently with a specific upstream regulatory DNA sequence (transcription factor recognition sequence or binding site) located in the proximal promoter of a gene transcribed by RNA polymerase II. The proximal promoter is in cis with and relatively…	5	5	0.447707	0.000136011	HIF1A,HMGA2,MYC,STAT3,TP53	1
RNA polymerase II regulatory region DNA binding	info:{"super-categories": "['nucleic acid binding']", "namespace": "molecular_function", "id": "GO:0001012", "def": "\"Interacting selectively and non-covalently with a DNA region that controls the transcription of a region of DNA by RNA polymerase II. Binding may occur as a sequence specific interaction or as an interaction observed only once a factor has been recruited to the DNA by other facto…	6	6	0.664699	8.19856e-05	HIF1A,HMGA2,MYC,RB1,STAT3,TP53	1
RNA polymerase II regulatory region sequence-specific DNA binding	info:{"super-categories": "['nucleic acid binding']", "namespace": "molecular_function", "id": "GO:0000977", "def": "\"Interacting selectively and non-covalently with a specific sequence of DNA that is part of a regulatory region that controls the transcription of a gene or cistron by RNA polymerase II.\" [GOC:txnOH]", "name": "RNA polymerase II regulatory region sequence-specific DNA binding"}	5	5	0.658695	0.000569754	HIF1A,HMGA2,MYC,STAT3,TP53	1
RNA polymerase II-specific DNA-binding transcription factor binding	info:{"super-categories": "['transcription factor binding']", "namespace": "molecular_function", "id": "GO:0061629", "def": "\"Interacting selectively and non-covalently with a sequence-specific DNA binding RNA polymerase II transcription factor, any of the factors that interact selectively and non-covalently with a specific DNA sequence in order to modulate transcription.\" [GOC:dph, GOC:vw]", "…	5	5	0.241007	1.54666e-05	BRCA1,HIF1A,RB1,STAT3,TP53	1
activating transcription factor binding	info:{"super-categories": "['transcription factor binding']", "namespace": "molecular_function", "id": "GO:0033613", "def": "\"Interacting selectively and non-covalently with an activating transcription factor, any protein whose activity is required to initiate or upregulate transcription.\" [GOC:mah, GOC:txnOH]", "name": "activating transcription factor binding"}	3	3	0.0737602	0.000127078	MYC,RB1,TP53	1
carbohydrate derivative binding	info:{"super-categories": "[]", "namespace": "molecular_function", "id": "GO:0097367", "def": "\"Interacting selectively and non-covalently with a carbohydrate derivative.\" [GOC:pr]", "name": "carbohydrate derivative binding"}	3	3	1.87831	0.288091	TP53,VEGFA,WEE1	1
catalytic activity	info:{"super-categories": "[]", "namespace": "molecular_function", "id": "GO:0003824", "def": "\"Catalysis of a biochemical reaction at physiological temperatures. In biologically catalyzed reactions, the reactants are known as substrates, and the catalysts are naturally occurring macromolecular substances known as enzymes. Enzymes possess specific binding sites for substrates, and are usually co…	7	7	4.56284	0.147632	BRCA1,CDKN1A,CYLD,HMGA2,PTEN,WEE1,XIAP	1
cation binding	info:{"super-categories": "[]", "namespace": "molecular_function", "id": "GO:0043169", "def": "\"Interacting selectively and non-covalently with cations, charged atoms or groups of atoms with a net positive charge.\" [GOC:jl]", "name": "cation binding"}	6	6	3.6091	0.137734	BRCA1,CDKN1A,CYLD,TP53,WEE1,XIAP	1
chromatin binding	info:{"super-categories": "[]", "namespace": "molecular_function", "id": "GO:0003682", "def": "\"Interacting selectively and non-covalently with chromatin, the network of fibers of DNA, protein, and sometimes RNA, that make up the chromosomes of the eukaryotic nucleus during interphase.\" [GOC:jl, ISBN:0198506732, PMID:20404130]", "name": "chromatin binding"}	3	3	0.446849	0.0118329	HMGA2,STAT3,TP53	1
cyclin-dependent protein serine/threonine kinase regulator activity	info:{"super-categories": "['kinase regulator activity']", "namespace": "molecular_function", "id": "GO:0016538", "def": "\"Modulates the activity of a cyclin-dependent protein serine/threonine kinase, enzymes of the protein kinase family that are regulated through association with cyclins and other proteins.\" [GOC:pr, GOC:rn, PMID:7877684, PMID:9442875]", "name": "cyclin-dependent protein serin…	3	3	0.0403108	2.69787e-05	CCND1,CCND2,CDKN1A	1
double-stranded DNA binding	info:{"super-categories": "['nucleic acid binding']", "namespace": "molecular_function", "id": "GO:0003690", "def": "\"Interacting selectively and non-covalently with double-stranded DNA.\" [GOC:elh, GOC:vw]", "name": "double-stranded DNA binding"}	7	7	0.821654	2.65231e-05	E2F3,HIF1A,HMGA2,MYC,RB1,STAT3,TP53	1
enzyme binding	info:{"super-categories": "[]", "namespace": "molecular_function", "id": "GO:0019899", "def": "\"Interacting selectively and non-covalently with any enzyme.\" [GOC:jl]", "name": "enzyme binding"}	11	11	1.86287	1.83184e-06	BCL2L11,BRCA1,CCND1,CCND2,CDKN1A,CYLD,HIF1A,PTEN,RB1,STAT3,TP53	1
enzyme regulator activity	info:{"super-categories": "[]", "namespace": "molecular_function", "id": "GO:0030234", "def": "\"Binds to and modulates the activity of an enzyme.\" [GOC:dph, GOC:mah, GOC:tb]", "name": "enzyme regulator activity"}	5	5	0.86368	0.00165624	CCND1,CCND2,CDKN1A,TP53,XIAP	1
histone deacetylase binding	info:{"super-categories": "['enzyme binding']", "namespace": "molecular_function", "id": "GO:0042826", "def": "\"Interacting selectively and non-covalently with the enzyme histone deacetylase.\" [GOC:jl]", "name": "histone deacetylase binding"}	3	3	0.0943444	0.000219536	CCND1,HIF1A,TP53	1
hormone receptor binding	info:{"super-categories": "['signaling receptor binding']", "namespace": "molecular_function", "id": "GO:0051427", "def": "\"Interacting selectively and non-covalently with a receptor for hormones.\" [GOC:ai]", "name": "hormone receptor binding"}	4	4	0.159528	4.96761e-05	BRCA1,HIF1A,RB1,STAT3	1
identical protein binding	info:{"super-categories": "[]", "namespace": "molecular_function", "id": "GO:0042802", "def": "\"Interacting selectively and non-covalently with an identical protein or proteins.\" [GOC:jl]", "name": "identical protein binding"}	7	7	1.49922	0.000569754	BRCA1,PTEN,RB1,STAT3,TP53,VEGFA,XIAP	1
kinase binding	info:{"super-categories": "['enzyme binding']", "namespace": "molecular_function", "id": "GO:0019900", "def": "\"Interacting selectively and non-covalently with a kinase, any enzyme that catalyzes the transfer of a phosphate group.\" [GOC:jl]", "name": "kinase binding"}	10	10	0.624388	3.36654e-09	BCL2L11,CCND1,CCND2,CDKN1A,CYLD,HIF1A,PTEN,RB1,STAT3,TP53	1
kinase regulator activity	info:{"super-categories": "[]", "namespace": "molecular_function", "id": "GO:0019207", "def": "\"Modulates the activity of a kinase, an enzyme which catalyzes of the transfer of a phosphate group, usually from ATP, to a substrate molecule.\" [GOC:ai]", "name": "kinase regulator activity"}	3	3	0.175824	0.000936195	CCND1,CCND2,CDKN1A	1
metal ion binding	info:{"super-categories": "['cation binding']", "namespace": "molecular_function", "id": "GO:0046872", "def": "\"Interacting selectively and non-covalently with any metal ion.\" [GOC:ai]", "name": "metal ion binding"}	6	6	3.54049	0.130802	BRCA1,CDKN1A,CYLD,TP53,WEE1,XIAP	1
molecular function regulator	info:{"super-categories": "[]", "namespace": "molecular_function", "id": "GO:0098772", "def": "\"A molecular function that modulates the activity of a gene product or complex. Examples include enzyme regulators and channel regulators.\" [GOC:dos, GOC:pt]", "name": "molecular function regulator"}	6	6	1.49836	0.00318746	CCND1,CCND2,CDKN1A,TP53,VEGFA,XIAP	1
molecular_function	info:{"super-categories": "[]", "namespace": "molecular_function", "id": "GO:0003674", "def": "\"A molecular process that can be carried out by the action of a single macromolecular machine, usually via direct physical interactions with other molecular entities. Function in this sense denotes an action, or activity, that a gene product (or a complex) performs. These actions are described from two…	17	17	14.4639	0.0708889	BCL2L11,BRCA1,CCND1,CCND2,CDKN1A,CYLD,E2F3,HIF1A,HMGA2,MYC,PTEN,RB1,STAT3,TP53,VEGFA,WEE1,XIAP	1
nuclear hormone receptor binding	info:{"super-categories": "['signaling receptor binding', 'transcription factor binding']", "namespace": "molecular_function", "id": "GO:0035257", "def": "\"Interacting selectively and non-covalently with a nuclear hormone receptor, a ligand-dependent receptor found in the nucleus of the cell.\" [GOC:bf]", "name": "nuclear hormone receptor binding"}	4	4	0.131224	2.65231e-05	BRCA1,HIF1A,RB1,STAT3	1
nuclear receptor binding	info:{"super-categories": "['signaling receptor binding', 'transcription factor binding']", "namespace": "molecular_function", "id": "GO:0016922", "def": "\"Interacting selectively and non-covalently, in a ligand dependent manner, with a nuclear receptor protein.\" [GOC:mah, PMID:7776974]", "name": "nuclear receptor binding"}	3	3	0.0952021	0.000219536	BRCA1,RB1,STAT3	1
nucleic acid binding	info:{"super-categories": "[]", "namespace": "molecular_function", "id": "GO:0003676", "def": "\"Interacting selectively and non-covalently with any nucleic acid.\" [GOC:jl]", "name": "nucleic acid binding"}	8	8	3.36381	0.012641	BRCA1,E2F3,HIF1A,HMGA2,MYC,RB1,STAT3,TP53	1
organic cyclic compound binding	info:{"super-categories": "[]", "namespace": "molecular_function", "id": "GO:0097159", "def": "\"Interacting selectively and non-covalently with an organic cyclic compound, any molecular entity that contains carbon arranged in a cyclic molecular structure.\" [CHEBI:33832, GOC:sjw, PMID:7583672]", "name": "organic cyclic compound binding"}	9	9	5.04399	0.0433956	BRCA1,E2F3,HIF1A,HMGA2,MYC,RB1,STAT3,TP53,WEE1	1
protein binding	info:{"super-categories": "[]", "namespace": "molecular_function", "id": "GO:0005515", "def": "\"Interacting selectively and non-covalently with any protein or protein complex (a complex of two or more proteins that may include other nonprotein molecules).\" [GOC:go_curators]", "name": "protein binding"}	17	17	10.0082	0.00023496	BCL2L11,BRCA1,CCND1,CCND2,CDKN1A,CYLD,E2F3,HIF1A,HMGA2,MYC,PTEN,RB1,STAT3,TP53,VEGFA,WEE1,XIAP	1
protein dimerization activity	info:{"super-categories": "[]", "namespace": "molecular_function", "id": "GO:0046983", "def": "\"The formation of a protein dimer, a macromolecular structure consists of two noncovalently associated identical or nonidentical subunits.\" [ISBN:0198506732]", "name": "protein dimerization activity"}	7	7	1.09439	0.000127078	BCL2L11,E2F3,HIF1A,MYC,STAT3,TP53,VEGFA	1
protein domain specific binding	info:{"super-categories": "[]", "namespace": "molecular_function", "id": "GO:0019904", "def": "\"Interacting selectively and non-covalently with a specific domain of a protein.\" [GOC:go_curators]", "name": "protein domain specific binding"}	5	5	0.591797	0.000369052	HIF1A,HMGA2,PTEN,RB1,TP53	1
protein heterodimerization activity	info:{"super-categories": "['protein dimerization activity']", "namespace": "molecular_function", "id": "GO:0046982", "def": "\"Interacting selectively and non-covalently with a nonidentical protein to form a heterodimer.\" [GOC:ai]", "name": "protein heterodimerization activity"}	4	4	0.389385	0.000736773	BCL2L11,HIF1A,TP53,VEGFA	1
protein homodimerization activity	info:{"super-categories": "['identical protein binding', 'protein dimerization activity']", "namespace": "molecular_function", "id": "GO:0042803", "def": "\"Interacting selectively and non-covalently with an identical protein to form a homodimer.\" [GOC:jl]", "name": "protein homodimerization activity"}	3	3	0.73074	0.0405427	STAT3,TP53,VEGFA	1
protein kinase binding	info:{"super-categories": "['enzyme binding']", "namespace": "molecular_function", "id": "GO:0019901", "def": "\"Interacting selectively and non-covalently with a protein kinase, any enzyme that catalyzes the transfer of a phosphate group, usually from ATP, to a protein substrate.\" [GOC:jl]", "name": "protein kinase binding"}	9	9	0.554059	1.60333e-08	BCL2L11,CCND1,CCND2,CDKN1A,CYLD,HIF1A,PTEN,STAT3,TP53	1
protein kinase regulator activity	info:{"super-categories": "['kinase regulator activity']", "namespace": "molecular_function", "id": "GO:0019887", "def": "\"Modulates the activity of a protein kinase, an enzyme which phosphorylates a protein.\" [GOC:ai]", "name": "protein kinase regulator activity"}	3	3	0.152666	0.000655761	CCND1,CCND2,CDKN1A	1
protein-containing complex binding	info:{"super-categories": "[]", "namespace": "molecular_function", "id": "GO:0044877", "def": "\"Interacting selectively and non-covalently with a macromolecular complex.\" [GOC:jl]", "name": "protein-containing complex binding"}	6	6	0.923717	0.000335381	CCND1,CDKN1A,HMGA2,MYC,PTEN,TP53	1
proximal promoter sequence-specific DNA binding	info:{"super-categories": "['nucleic acid binding']", "namespace": "molecular_function", "id": "GO:0000987", "def": "\"Interacting selectively and non-covalently with a specific upstream regulatory DNA sequence (transcription factor recognition sequence or binding site) located in the proximal promoter. The proximal promoter is in cis with and relatively close to the core promoter.\" [GOC:pg, GOC…	7	7	0.46143	1.83184e-06	E2F3,HIF1A,HMGA2,MYC,RB1,STAT3,TP53	1
sequence-specific DNA binding	info:{"super-categories": "['nucleic acid binding']", "namespace": "molecular_function", "id": "GO:0043565", "def": "\"Interacting selectively and non-covalently with DNA of a specific nucleotide composition, e.g. GC-rich DNA binding, or with a specific sequence motif or type of DNA e.g. promotor binding or rDNA binding.\" [GOC:jl]", "name": "sequence-specific DNA binding"}	7	7	1.00091	8.02342e-05	E2F3,HIF1A,HMGA2,MYC,RB1,STAT3,TP53	1
sequence-specific double-stranded DNA binding	info:{"super-categories": "['nucleic acid binding']", "namespace": "molecular_function", "id": "GO:1990837", "def": "\"Interacting selectively and non-covalently with double-stranded DNA of a specific nucleotide composition, e.g. GC-rich DNA binding, or with a specific sequence motif or type of DNA, e.g. promotor binding or rDNA binding.\" [GOC:dos, GOC:sl]", "name": "sequence-specific double-str…	7	7	0.744463	1.72779e-05	E2F3,HIF1A,HMGA2,MYC,RB1,STAT3,TP53	1
signaling receptor binding	info:{"super-categories": "[]", "namespace": "molecular_function", "id": "GO:0005102", "def": "\"Interacting selectively and non-covalently with one or more specific sites on a receptor molecule, a macromolecule that undergoes combination with a hormone, neurotransmitter, drug or intracellular messenger to initiate a change in cell function.\" [GOC:bf, GOC:ceb, ISBN:0198506732]", "name": "signali…	7	7	1.30109	0.000276088	BRCA1,HIF1A,PTEN,RB1,STAT3,TP53,VEGFA	1
steroid hormone receptor binding	info:{"super-categories": "['signaling receptor binding', 'transcription factor binding']", "namespace": "molecular_function", "id": "GO:0035258", "def": "\"Interacting selectively and non-covalently with a steroid hormone receptor.\" [GOC:bf]", "name": "steroid hormone receptor binding"}	3	3	0.0789062	0.000136011	BRCA1,RB1,STAT3	1
transcription coregulator activity	info:{"super-categories": "[]", "namespace": "molecular_function", "id": "GO:0003712", "def": "\"A protein or a member of a complex that interacts specifically and non-covalently with a DNA-bound DNA-binding transcription factor to either activate or repress the transcription of specific genes. Coregulators often act by altering chromatin structure and modifications. For example, one class of tra…	4	4	0.481156	0.00154153	BRCA1,CCND1,HMGA2,RB1	1
transcription factor binding	info:{"super-categories": "[]", "namespace": "molecular_function", "id": "GO:0008134", "def": "\"Interacting selectively and non-covalently with a transcription factor, a protein required to initiate or regulate transcription.\" [ISBN:0198506732]", "name": "transcription factor binding"}	9	9	0.566924	1.60333e-08	BRCA1,CCND1,E2F3,HIF1A,HMGA2,MYC,RB1,STAT3,TP53	1
transcription regulatory region DNA binding	info:{"super-categories": "['nucleic acid binding']", "namespace": "molecular_function", "id": "GO:0044212", "def": "\"Interacting selectively and non-covalently with a DNA region that regulates the transcription of a region of DNA, which may be a gene, cistron, or operon. Binding may occur as a sequence specific interaction or as an interaction observed only once a factor has been recruited to t…	8	8	0.801927	3.42775e-06	BRCA1,E2F3,HIF1A,HMGA2,MYC,RB1,STAT3,TP53	1
transcription regulatory region sequence-specific DNA binding	info:{"super-categories": "['nucleic acid binding']", "namespace": "molecular_function", "id": "GO:0000976", "def": "\"Interacting selectively and non-covalently with a specific sequence of DNA that is part of a regulatory region that controls transcription of that section of the DNA. The transcribed region might be described as a gene, cistron, or operon.\" [GOC:txnOH]", "name": "transcription r…	7	7	0.704152	1.54666e-05	E2F3,HIF1A,HMGA2,MYC,RB1,STAT3,TP53	1
transferase activity	info:{"super-categories": "[]", "namespace": "molecular_function", "id": "GO:0016740", "def": "\"Catalysis of the transfer of a group, e.g. a methyl group, glycosyl group, acyl group, phosphorus-containing, or other groups, from one compound (generally regarded as the donor) to another compound (generally regarded as the acceptor). Transferase is the systematic name for any enzyme of EC class 2.\…	4	4	1.78997	0.103873	BRCA1,CDKN1A,WEE1,XIAP	1
transition metal ion binding	info:{"super-categories": "['cation binding']", "namespace": "molecular_function", "id": "GO:0046914", "def": "\"Interacting selectively and non-covalently with a transition metal ions; a transition metal is an element whose atom has an incomplete d-subshell of extranuclear electrons, or which gives rise to a cation or cations with an incomplete d-subshell. Transition metals often have more than …	3	3	0.915141	0.0680089	BRCA1,CYLD,TP53	1
ubiquitin protein ligase binding	info:{"super-categories": "['enzyme binding']", "namespace": "molecular_function", "id": "GO:0031625", "def": "\"Interacting selectively and non-covalently with a ubiquitin protein ligase enzyme, any of the E3 proteins.\" [GOC:vp]", "name": "ubiquitin protein ligase binding"}	5	5	0.249584	1.66825e-05	BRCA1,CDKN1A,HIF1A,RB1,TP53	1
ubiquitin-like protein ligase binding	info:{"super-categories": "['enzyme binding']", "namespace": "molecular_function", "id": "GO:0044389", "def": "\"Interacting selectively and non-covalently with a ubiquitin-like protein ligase, such as ubiquitin-ligase.\" [GOC:jl]", "name": "ubiquitin-like protein ligase binding"}	5	5	0.263307	1.8331e-05	BRCA1,CDKN1A,HIF1A,RB1,TP53	1
zinc ion binding	info:{"super-categories": "['cation binding']", "namespace": "molecular_function", "id": "GO:0008270", "def": "\"Interacting selectively and non-covalently with zinc (Zn) ions.\" [GOC:ai]", "name": "zinc ion binding"}	3	3	0.690429	0.035868	BRCA1,CYLD,TP53	1

## Sheet: KEGG pathways
#Name	Reference	Hits	Score	Expected Score	P-value	Info	Regulation_direction
AGE-RAGE signaling pathway in diabetic complications	{"levels": "['Human Diseases', 'Endocrine and metabolic disease']", "link": "http://www.genome.jp/dbget-bin/www_bget?path:hsa04933", "id": "04933"}	3	3	0.0857676	8.73375e-05	CCND1,STAT3,VEGFA	1
Acute myeloid leukemia	{"levels": "['Human Diseases', 'Cancer: specific types']", "link": "http://www.genome.jp/dbget-bin/www_bget?path:hsa05221", "id": "05221"}	3	3	0.0574643	2.87806e-05	CCND1,MYC,STAT3	1
Apoptosis	{"levels": "['Cellular Processes', 'Cell growth and death']", "link": "http://www.genome.jp/dbget-bin/www_bget?path:hsa04210", "id": "04210"}	3	3	0.115786	0.000208174	BCL2L11,TP53,XIAP	1
Bladder cancer	{"levels": "['Human Diseases', 'Cancer: specific types']", "link": "http://www.genome.jp/dbget-bin/www_bget?path:hsa05219", "id": "05219"}	7	7	0.0351647	3.07357e-14	CCND1,CDKN1A,E2F3,MYC,RB1,TP53,VEGFA	1
Breast cancer	{"levels": "['Human Diseases', 'Cancer: specific types']", "link": "http://www.genome.jp/dbget-bin/www_bget?path:hsa05224", "id": "05224"}	8	8	0.126078	8.84889e-13	BRCA1,CCND1,CDKN1A,E2F3,MYC,PTEN,RB1,TP53	1
Cell cycle	{"levels": "['Cellular Processes', 'Cell growth and death']", "link": "http://www.genome.jp/dbget-bin/www_bget?path:hsa04110", "id": "04110"}	8	8	0.106352	2.98738e-13	CCND1,CCND2,CDKN1A,E2F3,MYC,RB1,TP53,WEE1	1
Cellular senescence	{"levels": "['Cellular Processes', 'Cell growth and death']", "link": "http://www.genome.jp/dbget-bin/www_bget?path:hsa04218", "id": "04218"}	8	8	0.137228	1.60167e-12	CCND1,CCND2,CDKN1A,E2F3,MYC,PTEN,RB1,TP53	1
Central carbon metabolism in cancer	{"levels": "['Human Diseases', 'Cancer: overview']", "link": "http://www.genome.jp/dbget-bin/www_bget?path:hsa05230", "id": "05230"}	4	4	0.0591797	4.77981e-07	HIF1A,MYC,PTEN,TP53	1
Chronic myeloid leukemia	{"levels": "['Human Diseases', 'Cancer: specific types']", "link": "http://www.genome.jp/dbget-bin/www_bget?path:hsa05220", "id": "05220"}	6	6	0.0651834	8.81024e-11	CCND1,CDKN1A,E2F3,MYC,RB1,TP53	1
Colorectal cancer	{"levels": "['Human Diseases', 'Cancer: specific types']", "link": "http://www.genome.jp/dbget-bin/www_bget?path:hsa05210", "id": "05210"}	5	5	0.0737602	1.47865e-08	BCL2L11,CCND1,CDKN1A,MYC,TP53	1
Cushing syndrome	{"levels": "['Human Diseases', 'Endocrine and metabolic disease']", "link": "http://www.genome.jp/dbget-bin/www_bget?path:hsa04934", "id": "04934"}	4	4	0.133797	1.00915e-05	CCND1,CDKN1A,E2F3,RB1	1
EGFR tyrosine kinase inhibitor resistance	{"levels": "['Human Diseases', 'Drug resistance: antineoplastic']", "link": "http://www.genome.jp/dbget-bin/www_bget?path:hsa01521", "id": "01521"}	4	4	0.0677564	7.50134e-07	BCL2L11,PTEN,STAT3,VEGFA	1
Endocrine resistance	{"levels": "['Human Diseases', 'Drug resistance: antineoplastic']", "link": "http://www.genome.jp/dbget-bin/www_bget?path:hsa01522", "id": "01522"}	5	5	0.0840523	2.67483e-08	CCND1,CDKN1A,E2F3,RB1,TP53	1
Endometrial cancer	{"levels": "['Human Diseases', 'Cancer: specific types']", "link": "http://www.genome.jp/dbget-bin/www_bget?path:hsa05213", "id": "05213"}	5	5	0.0497452	2.40217e-09	CCND1,CDKN1A,MYC,PTEN,TP53	1
Epstein-Barr virus infection	{"levels": "['Human Diseases', 'Infectious disease: viral']", "link": "http://www.genome.jp/dbget-bin/www_bget?path:hsa05169", "id": "05169"}	9	9	0.171535	1.74404e-13	BCL2L11,CCND1,CCND2,CDKN1A,E2F3,MYC,RB1,STAT3,TP53	1
Focal adhesion	{"levels": "['Cellular Processes', 'Cellular community - eukaryotes']", "link": "http://www.genome.jp/dbget-bin/www_bget?path:hsa04510", "id": "04510"}	5	5	0.170678	7.50134e-07	CCND1,CCND2,PTEN,VEGFA,XIAP	1
FoxO signaling pathway	{"levels": "['Environmental Information Processing', 'Signal transduction']", "link": "http://www.genome.jp/dbget-bin/www_bget?path:hsa04068", "id": "04068"}	6	6	0.112356	2.00724e-09	BCL2L11,CCND1,CCND2,CDKN1A,PTEN,STAT3	1
Gastric cancer	{"levels": "['Human Diseases', 'Cancer: specific types']", "link": "http://www.genome.jp/dbget-bin/www_bget?path:hsa05226", "id": "05226"}	6	6	0.126078	3.69254e-09	CCND1,CDKN1A,E2F3,MYC,RB1,TP53	1
Glioma	{"levels": "['Human Diseases', 'Cancer: specific types']", "link": "http://www.genome.jp/dbget-bin/www_bget?path:hsa05214", "id": "05214"}	6	6	0.0643257	8.59613e-11	CCND1,CDKN1A,E2F3,PTEN,RB1,TP53	1
HIF-1 signaling pathway	{"levels": "['Environmental Information Processing', 'Signal transduction']", "link": "http://www.genome.jp/dbget-bin/www_bget?path:hsa04066", "id": "04066"}	4	4	0.0934867	2.61559e-06	CDKN1A,HIF1A,STAT3,VEGFA	1
Hepatitis B	{"levels": "['Human Diseases', 'Infectious disease: viral']", "link": "http://www.genome.jp/dbget-bin/www_bget?path:hsa05161", "id": "05161"}	6	6	0.138944	6.36605e-09	CDKN1A,E2F3,MYC,RB1,STAT3,TP53	1
Hepatitis C	{"levels": "['Human Diseases', 'Infectious disease: viral']", "link": "http://www.genome.jp/dbget-bin/www_bget?path:hsa05160", "id": "05160"}	7	7	0.13294	8.59613e-11	CCND1,CDKN1A,E2F3,MYC,RB1,STAT3,TP53	1
Hepatocellular carcinoma	{"levels": "['Human Diseases', 'Cancer: specific types']", "link": "http://www.genome.jp/dbget-bin/www_bget?path:hsa05225", "id": "05225"}	7	7	0.143232	1.29172e-10	CCND1,CDKN1A,E2F3,MYC,PTEN,RB1,TP53	1
Hippo signaling pathway	{"levels": "['Environmental Information Processing', 'Signal transduction']", "link": "http://www.genome.jp/dbget-bin/www_bget?path:hsa04390", "id": "04390"}	3	3	0.131224	0.000294814	CCND1,CCND2,MYC	1
Human T-cell leukemia virus 1 infection	{"levels": "['Human Diseases', 'Infectious disease: viral']", "link": "http://www.genome.jp/dbget-bin/www_bget?path:hsa05166", "id": "05166"}	9	9	0.187831	2.98738e-13	CCND1,CCND2,CDKN1A,E2F3,MYC,PTEN,RB1,TP53,XIAP	1
Human cytomegalovirus infection	{"levels": "['Human Diseases', 'Infectious disease: viral']", "link": "http://www.genome.jp/dbget-bin/www_bget?path:hsa05163", "id": "05163"}	8	8	0.192977	2.12617e-11	CCND1,CDKN1A,E2F3,MYC,RB1,STAT3,TP53,VEGFA	1
Human papillomavirus infection	{"levels": "['Human Diseases', 'Infectious disease: viral']", "link": "http://www.genome.jp/dbget-bin/www_bget?path:hsa05165", "id": "05165"}	7	7	0.282175	1.03749e-08	CCND1,CCND2,CDKN1A,PTEN,RB1,TP53,VEGFA	1
Jak-STAT signaling pathway	{"levels": "['Environmental Information Processing', 'Signal transduction']", "link": "http://www.genome.jp/dbget-bin/www_bget?path:hsa04630", "id": "04630"}	5	5	0.138944	3.12307e-07	CCND1,CCND2,CDKN1A,MYC,STAT3	1
Kaposi sarcoma-associated herpesvirus infection	{"levels": "['Human Diseases', 'Infectious disease: viral']", "link": "http://www.genome.jp/dbget-bin/www_bget?path:hsa05167", "id": "05167"}	9	9	0.159528	1.07956e-13	CCND1,CDKN1A,E2F3,HIF1A,MYC,RB1,STAT3,TP53,VEGFA	1
MAPK signaling pathway	{"levels": "['Environmental Information Processing', 'Signal transduction']", "link": "http://www.genome.jp/dbget-bin/www_bget?path:hsa04010", "id": "04010"}	3	3	0.252157	0.00188269	MYC,TP53,VEGFA	1
Measles	{"levels": "['Human Diseases', 'Infectious disease: viral']", "link": "http://www.genome.jp/dbget-bin/www_bget?path:hsa05162", "id": "05162"}	4	4	0.118359	6.36208e-06	CCND1,CCND2,STAT3,TP53	1
Melanoma	{"levels": "['Human Diseases', 'Cancer: specific types']", "link": "http://www.genome.jp/dbget-bin/www_bget?path:hsa05218", "id": "05218"}	6	6	0.0617527	7.57005e-11	CCND1,CDKN1A,E2F3,PTEN,RB1,TP53	1
MicroRNAs in cancer	{"levels": "['Human Diseases', 'Cancer: overview']", "link": "http://www.genome.jp/dbget-bin/www_bget?path:hsa05206", "id": "05206"}	12	12	0.138086	1.65734e-20	BCL2L11,BRCA1,CCND1,CCND2,CDKN1A,E2F3,HMGA2,MYC,PTEN,STAT3,TP53,VEGFA	1
Necroptosis	{"levels": "['Cellular Processes', 'Cell growth and death']", "link": "http://www.genome.jp/dbget-bin/www_bget?path:hsa04217", "id": "04217"}	3	3	0.139801	0.000347927	CYLD,STAT3,XIAP	1
Non-small cell lung cancer	{"levels": "['Human Diseases', 'Cancer: specific types']", "link": "http://www.genome.jp/dbget-bin/www_bget?path:hsa05223", "id": "05223"}	6	6	0.0566066	4.73023e-11	CCND1,CDKN1A,E2F3,RB1,STAT3,TP53	1
PD-L1 expression and PD-1 checkpoint pathway in cancer	{"levels": "['Human Diseases', 'Cancer: overview']", "link": "http://www.genome.jp/dbget-bin/www_bget?path:hsa05235", "id": "05235"}	3	3	0.0771909	6.51775e-05	HIF1A,PTEN,STAT3	1
PI3K-Akt signaling pathway	{"levels": "['Environmental Information Processing', 'Signal transduction']", "link": "http://www.genome.jp/dbget-bin/www_bget?path:hsa04151", "id": "04151"}	9	9	0.30276	1.48407e-11	BCL2L11,BRCA1,CCND1,CCND2,CDKN1A,MYC,PTEN,TP53,VEGFA	1
Pancreatic cancer	{"levels": "['Human Diseases', 'Cancer: specific types']", "link": "http://www.genome.jp/dbget-bin/www_bget?path:hsa05212", "id": "05212"}	7	7	0.0643257	8.84889e-13	CCND1,CDKN1A,E2F3,RB1,STAT3,TP53,VEGFA	1
Pathways in cancer	{"levels": "['Human Diseases', 'Cancer: overview']", "link": "http://www.genome.jp/dbget-bin/www_bget?path:hsa05200", "id": "05200"}	13	13	0.453711	1.65974e-16	BCL2L11,CCND1,CCND2,CDKN1A,E2F3,HIF1A,MYC,PTEN,RB1,STAT3,TP53,VEGFA,XIAP	1
Platinum drug resistance	{"levels": "['Human Diseases', 'Drug resistance: antineoplastic']", "link": "http://www.genome.jp/dbget-bin/www_bget?path:hsa01524", "id": "01524"}	4	4	0.0626104	5.66212e-07	BRCA1,CDKN1A,TP53,XIAP	1
Prolactin signaling pathway	{"levels": "['Organismal Systems', 'Endocrine system']", "link": "http://www.genome.jp/dbget-bin/www_bget?path:hsa04917", "id": "04917"}	3	3	0.0600373	3.13753e-05	CCND1,CCND2,STAT3	1
Prostate cancer	{"levels": "['Human Diseases', 'Cancer: specific types']", "link": "http://www.genome.jp/dbget-bin/www_bget?path:hsa05215", "id": "05215"}	6	6	0.0831946	3.54832e-10	CCND1,CDKN1A,E2F3,PTEN,RB1,TP53	1
Proteoglycans in cancer	{"levels": "['Human Diseases', 'Cancer: overview']", "link": "http://www.genome.jp/dbget-bin/www_bget?path:hsa05205", "id": "05205"}	7	7	0.172393	4.30484e-10	CCND1,CDKN1A,HIF1A,MYC,STAT3,TP53,VEGFA	1
Renal cell carcinoma	{"levels": "['Human Diseases', 'Cancer: specific types']", "link": "http://www.genome.jp/dbget-bin/www_bget?path:hsa05211", "id": "05211"}	3	3	0.0591797	3.07295e-05	CDKN1A,HIF1A,VEGFA	1
Small cell lung cancer	{"levels": "['Human Diseases', 'Cancer: specific types']", "link": "http://www.genome.jp/dbget-bin/www_bget?path:hsa05222", "id": "05222"}	8	8	0.0789062	4.72637e-14	CCND1,CDKN1A,E2F3,MYC,PTEN,RB1,TP53,XIAP	1
Thyroid cancer	{"levels": "['Human Diseases', 'Cancer: specific types']", "link": "http://www.genome.jp/dbget-bin/www_bget?path:hsa05216", "id": "05216"}	4	4	0.031734	3.95312e-08	CCND1,CDKN1A,MYC,TP53	1
Thyroid hormone signaling pathway	{"levels": "['Organismal Systems', 'Endocrine system']", "link": "http://www.genome.jp/dbget-bin/www_bget?path:hsa04919", "id": "04919"}	4	4	0.102063	3.61857e-06	CCND1,HIF1A,MYC,TP53	1
Transcriptional misregulation in cancer	{"levels": "['Human Diseases', 'Cancer: overview']", "link": "http://www.genome.jp/dbget-bin/www_bget?path:hsa05202", "id": "05202"}	5	5	0.15867	5.66212e-07	CCND2,CDKN1A,HMGA2,MYC,TP53	1
Viral carcinogenesis	{"levels": "['Human Diseases', 'Cancer: overview']", "link": "http://www.genome.jp/dbget-bin/www_bget?path:hsa05203", "id": "05203"}	6	6	0.172393	2.00149e-08	CCND1,CCND2,CDKN1A,RB1,STAT3,TP53	1
Wnt signaling pathway	{"levels": "['Environmental Information Processing', 'Signal transduction']", "link": "http://www.genome.jp/dbget-bin/www_bget?path:hsa04310", "id": "04310"}	4	4	0.137228	1.08888e-05	CCND1,CCND2,MYC,TP53	1
p53 signaling pathway	{"levels": "['Cellular Processes', 'Cell growth and death']", "link": "http://www.genome.jp/dbget-bin/www_bget?path:hsa04115", "id": "04115"}	5	5	0.0617527	6.44293e-09	CCND1,CCND2,CDKN1A,PTEN,TP53	1

## Sheet: Reactome pathways
#Name	Reference	Hits	Score	Expected Score	P-value	Info	Regulation_direction
Cyclin A:Cdk2-associated events at S phase entry	info:{"levels": ["S Phase"], "link": "https://reactome.org/PathwayBrowser/#/R-HSA-69656", "id": "R-HSA-69656"}	4	4	0.0257303	2.25165e-08	CDKN1A,MYC,RB1,WEE1	1
Cyclin D associated events in G1	info:{"levels": ["G1 Phase"], "link": "https://reactome.org/PathwayBrowser/#/R-HSA-69231", "id": "R-HSA-69231"}	5	5	0.0377378	1.16363e-09	CCND1,CCND2,CDKN1A,E2F3,RB1	1
Cyclin E associated events during G1/S transition	info:{"levels": ["G1/S Transition"], "link": "https://reactome.org/PathwayBrowser/#/R-HSA-69202", "id": "R-HSA-69202"}	4	4	0.0240149	2.24538e-08	CDKN1A,MYC,RB1,WEE1	1
Formation of Senescence-Associated Heterochromatin Foci (SAHF)	info:{"levels": ["DNA Damage/Telomere Stress Induced Senescence"], "link": "https://reactome.org/PathwayBrowser/#/R-HSA-2559584", "id": "R-HSA-2559584"}	3	3	0.0137228	5.24587e-07	HMGA2,RB1,TP53	1
Interleukin-4 and Interleukin-13 signaling	info:{"levels": ["Signaling by Interleukins"], "link": "https://reactome.org/PathwayBrowser/#/R-HSA-6785807", "id": "R-HSA-6785807"}	7	7	0.092629	1.95912e-11	CCND1,CDKN1A,HIF1A,MYC,STAT3,TP53,VEGFA	1
Oncogene Induced Senescence	info:{"levels": ["Cellular Senescence"], "link": "https://reactome.org/PathwayBrowser/#/R-HSA-2559585", "id": "R-HSA-2559585"}	3	3	0.0283033	3.61795e-06	E2F3,RB1,TP53	1
Pre-NOTCH Transcription and Translation	info:{"levels": ["Pre-NOTCH Expression and Processing"], "link": "https://reactome.org/PathwayBrowser/#/R-HSA-1912408", "id": "R-HSA-1912408"}	3	3	0.0797639	6.48323e-05	CCND1,E2F3,TP53	1
Transcriptional regulation of granulopoiesis	info:{"levels": ["Developmental Biology"], "link": "https://reactome.org/PathwayBrowser/#/R-HSA-9616222", "id": "R-HSA-9616222"}	3	3	0.0771909	6.48323e-05	CDKN1A,MYC,STAT3	1
Ub-specific processing proteases	info:{"levels": ["Deubiquitination"], "link": "https://reactome.org/PathwayBrowser/#/R-HSA-5689880", "id": "R-HSA-5689880"}	5	5	0.188689	1.34027e-06	CYLD,HIF1A,MYC,PTEN,TP53	1

## Sheet: WIKI pathways
#Name	Reference	Hits	Score	Expected Score	P-value	Info	Regulation_direction
PI3K-Akt Signaling Pathway	http://www.wikipathways.org/instance/WP4172_r106781	9	9	0.29161	1.01392e-11	BCL2L11,BRCA1,CCND1,CCND2,CDKN1A,MYC,PTEN,TP53,VEGFA	1
Breast cancer pathway	http://www.wikipathways.org/instance/WP4262_r106787	8	8	0.132082	2.20715e-12	BRCA1,CCND1,CDKN1A,E2F3,MYC,PTEN,RB1,TP53	1
Cell Cycle	http://www.wikipathways.org/instance/WP179_r106351	8	8	0.102921	6.72744e-13	CCND1,CCND2,CDKN1A,E2F3,MYC,RB1,TP53,WEE1	1
G1 to S cell cycle control	http://www.wikipathways.org/instance/WP45_r106424	8	8	0.0548913	5.43762e-15	CCND1,CCND2,CDKN1A,E2F3,MYC,RB1,TP53,WEE1	1
Hepatitis C and Hepatocellular Carcinoma	http://www.wikipathways.org/instance/WP3646_r107467	8	8	0.0420261	1.11482e-15	BRCA1,CCND1,CDKN1A,HIF1A,MYC,STAT3,TP53,VEGFA	1
Integrated Breast Cancer Pathway	http://www.wikipathways.org/instance/WP1984_r106619	8	8	0.130367	2.20715e-12	BRCA1,CCND1,MYC,PTEN,RB1,TP53,VEGFA,WEE1	1
DNA Damage Response	http://www.wikipathways.org/instance/WP707_r107190	7	7	0.058322	1.1748e-12	BRCA1,CCND1,CCND2,CDKN1A,MYC,RB1,TP53	1
DNA Damage Response (only ATM dependent)	http://www.wikipathways.org/instance/WP710_r106372	7	7	0.0943444	1.01392e-11	BCL2L11,CCND1,CCND2,CDKN1A,MYC,PTEN,TP53	1
Pancreatic adenocarcinoma pathway	http://www.wikipathways.org/instance/WP4263_r105482	7	7	0.0763332	3.07993e-12	CCND1,CDKN1A,E2F3,RB1,STAT3,TP53,VEGFA	1
Retinoblastoma Gene in Cancer	http://www.wikipathways.org/instance/WP2446_r106493	7	7	0.0746178	3.07993e-12	CCND1,CDKN1A,E2F3,MYC,RB1,TP53,WEE1	1
Signaling Pathways in Glioblastoma	http://www.wikipathways.org/instance/WP2261_r107126	7	7	0.0703294	2.2893e-12	BRCA1,CCND1,CCND2,CDKN1A,PTEN,RB1,TP53	1
Small cell lung cancer	http://www.wikipathways.org/instance/WP4658_r106808	7	7	0.0814792	4.41054e-12	CCND1,CDKN1A,E2F3,MYC,PTEN,RB1,TP53	1
miRNA Regulation of DNA Damage Response	http://www.wikipathways.org/instance/WP1530_r107119	7	7	0.060895	1.28757e-12	BRCA1,CCND1,CCND2,CDKN1A,MYC,RB1,TP53	1
Androgen receptor signaling pathway	http://www.wikipathways.org/instance/WP138_r105881	6	6	0.0771909	2.98111e-10	BRCA1,CCND1,CDKN1A,PTEN,RB1,STAT3	1
Bladder Cancer	http://www.wikipathways.org/instance/WP2828_r106313	6	6	0.034307	3.07993e-12	CCND1,CDKN1A,MYC,RB1,TP53,VEGFA	1
Head and Neck Squamous Cell Carcinoma	http://www.wikipathways.org/instance/WP4674_r107474	6	6	0.0566066	4.95051e-11	CCND1,CDKN1A,PTEN,RB1,TP53,VEGFA	1
Integrated Cancer Pathway	http://www.wikipathways.org/instance/WP1971_r106620	6	6	0.0377378	4.78367e-12	BRCA1,CDKN1A,MYC,PTEN,RB1,TP53	1
Non-small cell lung cancer	http://www.wikipathways.org/instance/WP4255_r105677	6	6	0.0617527	7.98916e-11	CCND1,CDKN1A,E2F3,RB1,STAT3,TP53	1
Chromosomal and microsatellite instability in colorectal cancer	http://www.wikipathways.org/instance/WP4216_r106356	5	5	0.0626104	9.34724e-09	BCL2L11,CCND1,CDKN1A,MYC,TP53	1
Endometrial cancer	http://www.wikipathways.org/instance/WP4155_r106779	5	5	0.0540336	4.59609e-09	CCND1,CDKN1A,MYC,PTEN,TP53	1
ErbB Signaling Pathway	http://www.wikipathways.org/instance/WP673_r106821	5	5	0.0780485	2.53687e-08	BCL2L11,CCND1,CDKN1A,MYC,TP53	1
Focal Adhesion	http://www.wikipathways.org/instance/WP306_r106731	5	5	0.16982	9.25127e-07	CCND1,CCND2,PTEN,VEGFA,XIAP	1
Gastrin Signaling Pathway	http://www.wikipathways.org/instance/WP4659_r106038	5	5	0.0977751	7.62242e-08	CCND1,CDKN1A,MYC,STAT3,VEGFA	1
Notch Signaling Pathway Netpath	http://www.wikipathways.org/instance/WP61_r107434	5	5	0.0523182	4.07945e-09	CCND1,CDKN1A,HIF1A,MYC,STAT3	1
Photodynamic therapy-induced AP-1 survival signaling.	http://www.wikipathways.org/instance/WP3611_r90923	5	5	0.0428838	1.53403e-09	BCL2L11,CCND1,CDKN1A,RB1,TP53	1
Adipogenesis	http://www.wikipathways.org/instance/WP236_r105873	4	4	0.111498	5.30293e-06	CDKN1A,HIF1A,RB1,STAT3	1
Apoptosis	http://www.wikipathways.org/instance/WP254_r106302	4	4	0.0720448	1.12911e-06	BCL2L11,MYC,TP53,XIAP	1
Aryl Hydrocarbon Receptor Netpath	http://www.wikipathways.org/instance/WP2586_r107439	4	4	0.0394531	1.28733e-07	CDKN1A,MYC,RB1,VEGFA	1
Copper homeostasis	http://www.wikipathways.org/instance/WP3286_r106367	4	4	0.0445992	1.98704e-07	CCND1,PTEN,TP53,XIAP	1
Focal Adhesion-PI3K-Akt-mTOR-signaling pathway	http://www.wikipathways.org/instance/WP3932_r106555	4	4	0.259876	0.000116528	CDKN1A,HIF1A,PTEN,VEGFA	1
Oncostatin M Signaling Pathway	http://www.wikipathways.org/instance/WP2374_r106575	4	4	0.055749	4.48676e-07	HIF1A,STAT3,TP53,VEGFA	1
Pathways Affected in Adenoid Cystic Carcinoma	http://www.wikipathways.org/instance/WP3651_r106546	4	4	0.055749	4.48676e-07	BRCA1,MYC,PTEN,TP53	1
Pathways in clear cell renal cell carcinoma	http://www.wikipathways.org/instance/WP4018_r106515	4	4	0.0729025	1.15309e-06	HIF1A,PTEN,STAT3,VEGFA	1
Prader-Willi and Angelman Syndrome	http://www.wikipathways.org/instance/WP3998_r106536	4	4	0.0523182	3.68921e-07	CCND1,CCND2,RB1,TP53	1
Senescence and Autophagy in Cancer	http://www.wikipathways.org/instance/WP615_r106820	4	4	0.090056	2.49668e-06	CDKN1A,PTEN,RB1,TP53	1
Spinal Cord Injury	http://www.wikipathways.org/instance/WP2431_r106712	4	4	0.0994904	3.62964e-06	CCND1,MYC,RB1,TP53	1
TGF-beta Signaling Pathway	http://www.wikipathways.org/instance/WP366_r105483	4	4	0.113213	5.42748e-06	CCND1,CDKN1A,MYC,TP53	1
Vitamin D Receptor Pathway	http://www.wikipathways.org/instance/WP2877_r105854	4	4	0.156097	1.81882e-05	CCND1,CDKN1A,HIF1A,MYC	1
Wnt Signaling Pathway and Pluripotency	http://www.wikipathways.org/instance/WP399_r105855	4	4	0.087483	2.27861e-06	CCND1,CCND2,MYC,TP53	1
miRNAs involved in DNA damage response	http://www.wikipathways.org/instance/WP1545_r105864	4	4	0.0128651	1.53403e-09	CCND1,CDKN1A,MYC,TP53	1
ATM Signaling Pathway	http://www.wikipathways.org/instance/WP2516_r102220	3	3	0.034307	6.45176e-06	BRCA1,CDKN1A,TP53	1
Apoptosis Modulation and Signaling	http://www.wikipathways.org/instance/WP1772_r107525	3	3	0.0771909	6.52007e-05	BCL2L11,TP53,XIAP	1
Hepatitis B infection	http://www.wikipathways.org/instance/WP4666_r107486	3	3	0.129509	0.000281744	CDKN1A,MYC,STAT3	1
Hereditary leiomyomatosis and renal cell carcinoma pathway	http://www.wikipathways.org/instance/WP4206_r106784	3	3	0.0171535	1.00316e-06	HIF1A,TP53,VEGFA	1
Human Thyroid Stimulating Hormone (TSH) signaling pathway	http://www.wikipathways.org/instance/WP2032_r106594	3	3	0.0566066	2.77391e-05	MYC,RB1,STAT3	1
IL-2 Signaling Pathway	http://www.wikipathways.org/instance/WP49_r95132	3	3	0.0360224	7.33581e-06	CCND2,MYC,STAT3	1
IL-7 Signaling Pathway	http://www.wikipathways.org/instance/WP205_r106598	3	3	0.0214419	1.86328e-06	CCND1,MYC,STAT3	1
Leptin signaling pathway	http://www.wikipathways.org/instance/WP2034_r106629	3	3	0.0651834	4.079e-05	CCND1,PTEN,STAT3	1
LncRNA involvement in canonical Wnt signaling and colorectal cancer	http://www.wikipathways.org/instance/WP4258_r106508	3	3	0.0806216	7.29104e-05	CCND1,CCND2,MYC	1
LncRNA-mediated mechanisms of therapeutic resistance	http://www.wikipathways.org/instance/WP3672_r106632	3	3	0.00514606	2.53687e-08	CDKN1A,HIF1A,TP53	1
Mammary gland development pathway - Involution (Stage 4 of 4)	http://www.wikipathways.org/instance/WP2815_r102408	3	3	0.00857676	1.31781e-07	MYC,STAT3,TP53	1
Metastatic brain tumor	http://www.wikipathways.org/instance/WP2249_r107453	3	3	0.00514606	2.53687e-08	E2F3,MYC,TP53	1
Nuclear Receptors Meta-Pathway	http://www.wikipathways.org/instance/WP2882_r103038	3	3	0.273599	0.00237518	CCND1,MYC,STAT3	1
Photodynamic therapy-induced HIF-1 survival signaling	http://www.wikipathways.org/instance/WP3614_r106542	3	3	0.031734	5.30293e-06	HIF1A,TP53,VEGFA	1
RAC1/PAK1/p38/MMP2 Pathway	http://www.wikipathways.org/instance/WP3303_r106501	3	3	0.058322	2.97639e-05	MYC,STAT3,TP53	1
TP53 Network	http://www.wikipathways.org/instance/WP1742_r106445	3	3	0.0162958	9.03319e-07	CDKN1A,MYC,TP53	1
Type 2 papillary renal cell carcinoma	http://www.wikipathways.org/instance/WP4241_r106520	3	3	0.029161	4.27644e-06	CDKN1A,HIF1A,VEGFA	1
VEGFA-VEGFR2 Signaling Pathway	http://www.wikipathways.org/instance/WP3888_r106441	3	3	0.202412	0.0010184	CCND1,STAT3,VEGFA	1
Wnt Signaling	http://www.wikipathways.org/instance/WP428_r106791	3	3	0.0986328	0.000128232	CCND1,CCND2,MYC	1
miRNA regulation of prostate cancer signaling pathways	http://www.wikipathways.org/instance/WP3981_r97532	3	3	0.0283033	3.9919e-06	CCND1,CDKN1A,TP53	1
ncRNAs involved in Wnt signaling in hepatocellular carcinoma	http://www.wikipathways.org/instance/WP4336_r105488	3	3	0.0737602	5.79727e-05	CCND1,CCND2,MYC	1
