# Supplementary material for: Comprehensive Analysis of Serum Small Extracellular Vesicles-Derived Coding and Non-Coding RNAs from Retinoblastoma Patients for Identifying Regulatory Interactions
Source: Cancers (Basel). 2022 Aug 29;14(17):4179. doi: 10.3390/cancers14174179 (PMC9454787; doi:10.3390/cancers14174179)
Supplement: Supplementary file 1 [file cancers-14-04179-s001.zip › File S2 RB exosomal lncRNAs and lncRNA targets.xls]

## Sheet: lncRNA-miRNA
HOTAIR	miR-1	lncrna-mirna
HOTTIP	miR-101	lncrna-mirna
MALAT1	miR-101	lncrna-mirna
NEAT1	miR-101	lncrna-mirna
SNHG1	miR-101	lncrna-mirna
XIST	miR-101	lncrna-mirna
GAS5	miR-103	lncrna-mirna
MALAT1	miR-124	lncrna-mirna
NEAT1	miR-124	lncrna-mirna
SNHG14	miR-124	lncrna-mirna
XIST	miR-124	lncrna-mirna
KCNQ1OT1	miR-124	lncrna-mirna
LINC00511	mir-124	lncrna-mirna
OGFRP1	miR-124	lncrna-mirna
HCP5	miR-128	lncrna-mirna
LINC00963	miR-128	lncrna-mirna
MIR4435-2HG	miR-128	lncrna-mirna
MALAT1	miR-129	lncrna-mirna
NEAT1	miR-129	lncrna-mirna
SNHG12	miR-129	lncrna-mirna
DANCR	miR-135a	lncrna-mirna
MBNL1-AS1	miR-135a	lncrna-mirna
UCA1	miR-135a	lncrna-mirna
ZFAS1	miR-135a	lncrna-mirna
MCM3AP-AS1	miR-138	lncrna-mirna
OIP5-AS1	miR-153	lncrna-mirna
SNHG1	miR-153	lncrna-mirna
SNHG1	miR-15b	lncrna-mirna
SNHG12	miR-16	lncrna-mirna
LINC00662	miR-16	lncrna-mirna
NEAT1	miR-16	lncrna-mirna
SNHG1	miR-16	lncrna-mirna
CASC2	miR-181a	lncrna-mirna
LUCAT1	miR-181a	lncrna-mirna
MALAT1	miR-181a	lncrna-mirna
PVT1	miR-181a	lncrna-mirna
DLX6-AS1	miR-181b	lncrna-mirna
SNHG1	miR-181b	lncrna-mirna
GAS5	miR-181c	lncrna-mirna
NEAT1	miR-181d	lncrna-mirna
XIST	miR-186	lncrna-mirna
UCA1	miR-18a	lncrna-mirna
HOTAIR	miR-19	lncrna-mirna
NEAT1	miR-194	lncrna-mirna
MALAT1	miR-194	lncrna-mirna
NEAT1	miR-195a	lncrna-mirna
HOTAIRM1	miR-20a	lncrna-mirna
MEG3	miR-218	lncrna-mirna
MIR155HG	miR-218	lncrna-mirna
SNHG5	miR-26a	lncrna-mirna
DUXAP8	miR-29	lncrna-mirna
HULC	miR-29b	lncrna-mirna
OIP5-AS1	miR-29b	lncrna-mirna
MALAT1	miR-30	lncrna-mirna
MALAT1	miR-30b	lncrna-mirna
TSIX	miR-30b	lncrna-mirna
DLEU2	miR-30c	lncrna-mirna
LINC01139	miR-30c	lncrna-mirna
HAND2-AS1	miR-3118	lncrna-mirna
SNHG7	miR-34	lncrna-mirna
SNHG1	miR-376a	lncrna-mirna
TTN-AS1	miR-376a	lncrna-mirna
MEG3	miR-424	lncrna-mirna
AFAP1-AS1	miR-512	lncrna-mirna
ZFPM2-AS1	miR-515	lncrna-mirna
SNHG3	miR-515	lncrna-mirna
HOXA11‑AS	miR-518a	lncrna-mirna
HOTAIR	miR-519a	lncrna-mirna
HOTTIP	miR-574	lncrna-mirna
SNHG15	miR-7	lncrna-mirna
MEG3	miR-7	lncrna-mirna
ZFAS1	miR-7	lncrna-mirna
DUXAP8	miR-9	lncrna-mirna
KCNQ1OT1	miR-9	lncrna-mirna
LINC00682	miR-9	lncrna-mirna
SNHG7	miR-9	lncrna-mirna
LINC01116	miR-9	lncrna-mirna
NEAT1	miR-9	lncrna-mirna
RMRP	miR-1	lncrna-mirna
SNHG17	miR-124	lncrna-mirna
KCNQ1OT1	miR-129	lncrna-mirna
NEAT1	miR-133a	lncrna-mirna
XIST	miR-133a	lncrna-mirna
KIF9‑AS1	miR-16	lncrna-mirna
SNHG6	miR-181b	lncrna-mirna
SOX2OT	miR-194	lncrna-mirna
DLX6‐AS1	miR-199a	lncrna-mirna
TMPO‐AS1	miR-199a	lncrna-mirna
PCA3	miR-218	lncrna-mirna
CCAT1	MiR-219	lncrna-mirna
TNFSF10	MiR-376	lncrna-mirna
ANRIL	miR-7	lncrna-mirna
CASC2	miR-9	lncrna-mirna
UCA1	MIR1-1	lncrna-mirna
MALAT1	MIR101	lncrna-mirna
GHET1	Mir105	lncrna-mirna
GAS5	MIR106A	lncrna-mirna
GAS5‑AS1	MIR106A	lncrna-mirna
LINC00958	MIR106A	lncrna-mirna
LINC01133	MIR106A	lncrna-mirna
PVT1	MIR106A	lncrna-mirna
HOTAIRM1	MIR106B	lncrna-mirna
NEAT1	MIR106B	lncrna-mirna
PCA3	MIR106B	lncrna-mirna
FEZF1-AS1	MIR107	lncrna-mirna
MEG8	MIR107	lncrna-mirna
NEAT1	MIR107	lncrna-mirna
SNHG5	MIR10A	lncrna-mirna
ZFAS1	MIR10A	lncrna-mirna
LINC01391	MIR12116	lncrna-mirna
HULC	MIR122	lncrna-mirna
LINC01410	MIR122	lncrna-mirna
NEAT1	Mir122	lncrna-mirna
UCA1	MIR122	lncrna-mirna
MALAT1	MIR124-1	lncrna-mirna
GABPB1-AS1	MIR1246	lncrna-mirna
HOTAIR	Mir125	lncrna-mirna
CASC9	MIR125A	lncrna-mirna
NORAD	MIR125A	lncrna-mirna
BDNF-AS	MIR125B	lncrna-mirna
MALAT1	MIR125B	lncrna-mirna
PICSAR	MIR125B	lncrna-mirna
XIST	MIR125B	lncrna-mirna
HOTAIRM1	MIR125B1	lncrna-mirna
HOTTIP	MIR125B1	lncrna-mirna
FENDRR	MIR126	lncrna-mirna
HOTAIR	MIR126	lncrna-mirna
MALAT1	MIR126	lncrna-mirna
PRNCR1	MIR126	lncrna-mirna
PVT1	MIR126	lncrna-mirna
MEG3	MIR127	lncrna-mirna
MALAT1	MIR1271	lncrna-mirna
ZFAS1	MIR1271	lncrna-mirna
CRNDE	MIR1277	lncrna-mirna
NEAT1	MIR1277	lncrna-mirna
NEAT1	MIR128	lncrna-mirna
PCAT1	MIR128	lncrna-mirna
HCP5	MIR128-1	lncrna-mirna
OIP5-AS1	MIR128-1	lncrna-mirna
MALAT1	Mir129	lncrna-mirna
NEAT1	Mir129	lncrna-mirna
MALAT1	MIR129-1	lncrna-mirna
NEAT1	MIR129-1	lncrna-mirna
SNHG1	MIR129-1	lncrna-mirna
DANCR	MIR1305	lncrna-mirna
ADAMTS9-AS2	MIR130A	lncrna-mirna
MEG8	Mir130a	lncrna-mirna
XIST	MIR130A	lncrna-mirna
BDNF-AS	Mir130b	lncrna-mirna
KCNMB2-AS1	MIR130B	lncrna-mirna
APTR	MIR132	lncrna-mirna
BACE1‑AS	MIR132	lncrna-mirna
NEAT1	MIR132	lncrna-mirna
SNHG5	MIR132	lncrna-mirna
XIST	MIR132	lncrna-mirna
MIAT	Mir133a-1	lncrna-mirna
XIST	Mir133a-2	lncrna-mirna
EGFR-AS1	MIR133B	lncrna-mirna
NCK1‑AS1	MIR134	lncrna-mirna
TTN-AS1	MIR134	lncrna-mirna
GAS5	MIR135B	lncrna-mirna
CRNDE	MIR136	lncrna-mirna
DSCAM-AS1	MIR136	lncrna-mirna
GAS5	MIR137	lncrna-mirna
OIP5-AS1	MIR137	lncrna-mirna
XIST	MIR137	lncrna-mirna
XIST	MIR138-1	lncrna-mirna
KCNQ1OT1	Mir138-2	lncrna-mirna
HCP5	MIR139	lncrna-mirna
SNHG3	MIR139	lncrna-mirna
HCP5	MIR140	lncrna-mirna
KCNQ1OT1	MIR140	lncrna-mirna
LINC01140	MIR140	lncrna-mirna
MALAT1	MIR140	lncrna-mirna
MEG3	MIR140	lncrna-mirna
SNHG1	MIR140	lncrna-mirna
SNHG16	MIR140	lncrna-mirna
XIST	MIR140	lncrna-mirna
MALAT1	Mir141	lncrna-mirna
SNHG15	MIR141	lncrna-mirna
XIST	MIR141	lncrna-mirna
MALAT1	MIR142	lncrna-mirna
NEAT1	MIR142	lncrna-mirna
NNT-AS1	MIR142	lncrna-mirna
XIST	MIR142	lncrna-mirna
CDKN2B-AS1	MIR143	lncrna-mirna
HOTAIR	MIR143	lncrna-mirna
MALAT1	MIR143	lncrna-mirna
MEG3	MIR143	lncrna-mirna
OIP5-AS1	MIR143	lncrna-mirna
PSMG3‑AS1	MIR143	lncrna-mirna
PVT1	MIR143	lncrna-mirna
TMPO‑AS1	MIR143	lncrna-mirna
UCA1	MIR143	lncrna-mirna
CASC2	MIR144	lncrna-mirna
FEZF1-AS1	MIR144	lncrna-mirna
HCG11	MIR144	lncrna-mirna
MALAT1	MIR144	lncrna-mirna
UCA1	MIR144	lncrna-mirna
XIST	MIR144	lncrna-mirna
AFAP1-AS1	MIR145	lncrna-mirna
CASC15	MIR145	lncrna-mirna
DANCR	MIR145	lncrna-mirna
KCNQ1OT1	MIR145	lncrna-mirna
MALAT1	MIR145	lncrna-mirna
MEG3	MIR145	lncrna-mirna
MIAT	MIR145	lncrna-mirna
NEAT1	MIR145	lncrna-mirna
PCGEM1	MIR145	lncrna-mirna
PVT1	MIR145	lncrna-mirna
SNHG1	MIR145	lncrna-mirna
CRNDE	Mir145a	lncrna-mirna
CRNDE	MIR146A	lncrna-mirna
PVT1	MIR146A	lncrna-mirna
SNHG16	MIR146A	lncrna-mirna
NEAT1	MIR146B	lncrna-mirna
GAS5	MIR148A	lncrna-mirna
HOTAIR	MIR148A	lncrna-mirna
HOTAIRM1	MIR148A	lncrna-mirna
MALAT1	MIR148A	lncrna-mirna
MEG3	MIR148A	lncrna-mirna
NEAT1	MIR148A	lncrna-mirna
OIP5-AS1	MIR148A	lncrna-mirna
XIST	MIR148A	lncrna-mirna
HOTAIR	MIR148B	lncrna-mirna
MIAT	MIR148B	lncrna-mirna
DLGAP1-AS1	MIR149	lncrna-mirna
DLX6-AS1	MIR149	lncrna-mirna
GACAT3	MIR149	lncrna-mirna
HNF1A‐AS1	MIR149	lncrna-mirna
HOTAIR	MIR149	lncrna-mirna
KCNQ1OT1	MIR149	lncrna-mirna
LINC00460	MIR149	lncrna-mirna
LINC00472	MIR149	lncrna-mirna
MIAT	MIR149	lncrna-mirna
PART1	MIR149	lncrna-mirna
ZEB2‐AS1	MIR149	lncrna-mirna
LINC00449	MIR150	lncrna-mirna
LINC00511	MIR150	lncrna-mirna
MALAT1	MIR150	lncrna-mirna
MIAT	MIR150	lncrna-mirna
PVT1	MIR150	lncrna-mirna
ZFAS1	MIR150	lncrna-mirna
LINC01089	MIR152	lncrna-mirna
PVT1	MIR152	lncrna-mirna
XIST	MIR152	lncrna-mirna
MALAT1	MIR154	lncrna-mirna
SNHG1	MIR154	lncrna-mirna
XIST	MIR154	lncrna-mirna
MIAT	MIR155	lncrna-mirna
NORAD	MIR155	lncrna-mirna
XIST	MIR155	lncrna-mirna
MALAT1	MIR15A	lncrna-mirna
PVT1	MIR15A	lncrna-mirna
SNHG1	Mir15a	lncrna-mirna
TTN-AS1	MIR15A	lncrna-mirna
HOTAIR	MIR15B	lncrna-mirna
XIST	MIR16-1	lncrna-mirna
HNF1A-AS1	MIR17	lncrna-mirna
HOTAIR	MIR17	lncrna-mirna
LINC01939	MIR17	lncrna-mirna
MALAT1	MIR17	lncrna-mirna
PVT1	MIR17	lncrna-mirna
SNHG16	MIR17	lncrna-mirna
XIST	MIR17	lncrna-mirna
MEG3	Mir18	lncrna-mirna
SNHG1	Mir181a-1	lncrna-mirna
CASC2	MIR181A1	lncrna-mirna
CRNDE	MIR181A1	lncrna-mirna
KCNQ1OT1	MIR181A1	lncrna-mirna
SNHG1	MIR181A1	lncrna-mirna
SNHG12	MIR181A1	lncrna-mirna
MEG3	MIR181B1	lncrna-mirna
NEAT1	MIR181D	lncrna-mirna
GAS5	MIR182	lncrna-mirna
SNHG14	Mir182	lncrna-mirna
SNHG3	MIR182	lncrna-mirna
UCA1	MIR182	lncrna-mirna
CASC2	MIR183	lncrna-mirna
NEAT1	MIR183	lncrna-mirna
OTUD6B-AS1	MIR183	lncrna-mirna
UCA1	MIR184	lncrna-mirna
KCNQ1OT1	MIR185	lncrna-mirna
NNT‑AS1	MIR186	lncrna-mirna
PVT1	Mir187	lncrna-mirna
MALAT1	MIR188	lncrna-mirna
SNHG15	MIR188	lncrna-mirna
CASC2	MIR18A	lncrna-mirna
GAS5	MIR18A	lncrna-mirna
SNHG15	MIR18A	lncrna-mirna
KCNQ1OT1	MIR18B	lncrna-mirna
PVT1	MIR190A	lncrna-mirna
XIST	MIR192	lncrna-mirna
CASC2	MIR193A	lncrna-mirna
KCNQ1OT1	MIR193A	lncrna-mirna
NEAT1	MIR193A	lncrna-mirna
UCA1	MIR193A	lncrna-mirna
MIR31HG	MIR193B	lncrna-mirna
NEAT1	MIR193B	lncrna-mirna
SNHG7	MIR193B	lncrna-mirna
NEAT1	MIR194-1	lncrna-mirna
DGCR5	MIR195	lncrna-mirna
DLX6-AS1	MIR195	lncrna-mirna
MEG3	MIR195	lncrna-mirna
NEAT1	MIR195	lncrna-mirna
PVT1	MIR195	lncrna-mirna
SNHG1	MIR195	lncrna-mirna
TRPM2‐AS	MIR195	lncrna-mirna
UCA1	MIR195	lncrna-mirna
XIST	MIR195	lncrna-mirna
GAS5	MIR196A1	lncrna-mirna
SNHG12	Mir199a-2	lncrna-mirna
NBR2	MIR19A	lncrna-mirna
MALAT1	MIR19B1	lncrna-mirna
HOTAIR	Mir1a-1	lncrna-mirna
HEIH	MIR200A	lncrna-mirna
HULC	MIR200A	lncrna-mirna
LINC00467	MIR200A	lncrna-mirna
MALAT1	MIR200A	lncrna-mirna
SNHG16	MIR200A	lncrna-mirna
XIST	MIR200B	lncrna-mirna
ZFAS1	MIR200B	lncrna-mirna
LUCAT1	MIR200C	lncrna-mirna
MALAT1	MIR200C	lncrna-mirna
PVT1	MIR200C	lncrna-mirna
MALAT1	MIR202	lncrna-mirna
NORAD	MIR202	lncrna-mirna
CCDC26	MIR203A	lncrna-mirna
CRNDE	MIR203A	lncrna-mirna
DLX6-AS1	MIR203A	lncrna-mirna
FBXL19-AS1	MIR203A	lncrna-mirna
LINC00114	MIR203A	lncrna-mirna
LINC00342	MIR203A	lncrna-mirna
LINC01116	MIR203A	lncrna-mirna
MALAT1	MIR203A	lncrna-mirna
SNHG14	MIR203A	lncrna-mirna
UCA1	MIR203A	lncrna-mirna
XIST	MIR203A	lncrna-mirna
ATXN8OS	MIR204	lncrna-mirna
BANCR	MIR204	lncrna-mirna
DNM3OS	MIR204	lncrna-mirna
HCG11	MIR204	lncrna-mirna
NEAT1	MIR204	lncrna-mirna
NORAD	MIR204	lncrna-mirna
RMST	MIR204	lncrna-mirna
UCA1	MIR204	lncrna-mirna
XIST	MIR204	lncrna-mirna
ADPGK-AS1	MIR205	lncrna-mirna
CACNA1G-AS1	MIR205	lncrna-mirna
CRNDE	MIR205	lncrna-mirna
CYTOR	MIR205	lncrna-mirna
GAS5	MIR205	lncrna-mirna
MALAT1	MIR205	lncrna-mirna
MEG3	MIR205	lncrna-mirna
NEAT1	MIR205	lncrna-mirna
SNHG16	MIR205	lncrna-mirna
SNHG5	MIR205	lncrna-mirna
ZEB1-AS1	MIR205	lncrna-mirna
HOTAIR	MIR206	lncrna-mirna
KCNQ1OT1	Mir206	lncrna-mirna
MALAT1	MIR206	lncrna-mirna
MIAT	MIR206	lncrna-mirna
SNHG14	MIR206	lncrna-mirna
UCA1	MIR206	lncrna-mirna
HOTAIR	MIR20A	lncrna-mirna
HOTAIR	Mir20b	lncrna-mirna
CASC2	MIR21	lncrna-mirna
GAS5	MIR21	lncrna-mirna
MALAT1	MIR21	lncrna-mirna
MEG3	MIR21	lncrna-mirna
NEAT1	MIR21	lncrna-mirna
OTUD6B-AS1	MIR21	lncrna-mirna
PTENP1-AS	MIR21	lncrna-mirna
PWRN1	MIR21	lncrna-mirna
TCL6	MIR21	lncrna-mirna
XIST	MIR21	lncrna-mirna
GAPLINC	MIR211	lncrna-mirna
KCNQ1OT1	MIR211	lncrna-mirna
MCM3AP-AS1	MIR211	lncrna-mirna
MEG3	MIR211	lncrna-mirna
PRNCR1	MIR211	lncrna-mirna
SNHG14	MIR211	lncrna-mirna
SNHG15	MIR211	lncrna-mirna
TUSC7	MIR211	lncrna-mirna
CASC2	MIR212	lncrna-mirna
MEG3	MIR212	lncrna-mirna
NEAT1	MIR212	lncrna-mirna
DANCR	MIR214	lncrna-mirna
HNF1A-AS1	MIR214	lncrna-mirna
HOTAIR	MIR214	lncrna-mirna
MEG3	MIR214	lncrna-mirna
MIAT	MIR214	lncrna-mirna
NEAT1	Mir214	lncrna-mirna
PVT1	MIR214	lncrna-mirna
SNHG14	MIR214	lncrna-mirna
FTX	MIR215	lncrna-mirna
UICLM	MIR215	lncrna-mirna
DANCR	MIR216A	lncrna-mirna
OIP5-AS1	MIR216A	lncrna-mirna
SNHG16	MIR216A	lncrna-mirna
ZEB1-AS1	MIR216A	lncrna-mirna
KCNQ1OT1	MIR216B	lncrna-mirna
LINC01518	MIR216B	lncrna-mirna
CRNDE	MIR217	lncrna-mirna
HOTAIR	MIR217	lncrna-mirna
MALAT1	MIR217	lncrna-mirna
OIP5-AS1	MIR217	lncrna-mirna
PVT1	MIR217	lncrna-mirna
HOTAIR	MIR218-1	lncrna-mirna
KCNQ1OT1	MIR218-1	lncrna-mirna
MALAT1	MIR218-1	lncrna-mirna
NEAT1	MIR218-1	lncrna-mirna
GAS5	Mir21a	lncrna-mirna
KCNQ1OT1	Mir21a	lncrna-mirna
LINC00858	MIR22	lncrna-mirna
lnc-FTX	Mir22	lncrna-mirna
MALAT1	MIR22	lncrna-mirna
NNT-AS1	MIR22	lncrna-mirna
OIP5-AS1	MIR22	lncrna-mirna
TRPM2-AS	MIR22	lncrna-mirna
GAS5	MIR221	lncrna-mirna
NEAT1	Mir221	lncrna-mirna
CASC2	MIR222	lncrna-mirna
GAS5	MIR222	lncrna-mirna
ADAMTS9-AS2	MIR223	lncrna-mirna
MEG3	MIR223	lncrna-mirna
GAS5	MIR23A	lncrna-mirna
LINC00261	MIR23A	lncrna-mirna
MAGI2-AS3	MIR23A	lncrna-mirna
PVT1	MIR23A	lncrna-mirna
HOTAIR	MIR23B	lncrna-mirna
KTN1-AS1	MIR23B	lncrna-mirna
LINC00184	MIR23B	lncrna-mirna
MALAT1	MIR23B	lncrna-mirna
SNHG17	MIR23B	lncrna-mirna
UCA1	MIR23B	lncrna-mirna
KTN1-AS1	MIR23C	lncrna-mirna
NEAT1	MIR23C	lncrna-mirna
ZEB1-AS1	MIR23C	lncrna-mirna
CASC2	MIR24-1	lncrna-mirna
MIAT	Mir24-1	lncrna-mirna
NEAT1	MIR24-1	lncrna-mirna
SNHG5	MIR25	lncrna-mirna
MALAT1	MIR26B	lncrna-mirna
PVT1	MIR26B	lncrna-mirna
LINC01089	MIR27A	lncrna-mirna
OIP5‑AS1	MIR27A	lncrna-mirna
HCP5	MIR27B	lncrna-mirna
NEAT1	Mir27b	lncrna-mirna
OIP5-AS1	MIR27B	lncrna-mirna
UCA1	MIR27B	lncrna-mirna
UCA1	MIR28	lncrna-mirna
DGCR5	MIR2861	lncrna-mirna
ZFAS1	MIR296	lncrna-mirna
HCP5	MIR299	lncrna-mirna
RHPN1-AS1	MIR299	lncrna-mirna
MIAT	MIR29A	lncrna-mirna
NEAT1	MIR29A	lncrna-mirna
PVT1	Mir29a	lncrna-mirna
LINC00511	MIR29B1	lncrna-mirna
CRNDE	MIR29C	lncrna-mirna
MIAT	MIR29C	lncrna-mirna
MYOSLID	MIR29C	lncrna-mirna
XIST	MIR29C	lncrna-mirna
GAS5	MIR301A	lncrna-mirna
MEG3	Mir302a	lncrna-mirna
MIAT	MIR302A	lncrna-mirna
SNHG16	MIR302A	lncrna-mirna
MAGI1-IT1	MIR302D	lncrna-mirna
LINC00460	MIR30A	lncrna-mirna
LINC01133	MIR30A	lncrna-mirna
LINC01139	MIR30A	lncrna-mirna
OIP5-AS1	MIR30A	lncrna-mirna
LINC01139	MIR30B	lncrna-mirna
OIP5-AS1	MIR30B	lncrna-mirna
LINC01139	MIR30D	lncrna-mirna
LINC01139	MIR30E	lncrna-mirna
MALAT1	MIR3129	lncrna-mirna
LINC01116	MIR3141	lncrna-mirna
DUXAP8	MIR3182	lncrna-mirna
SNHG5	MIR32	lncrna-mirna
AFAP1-AS1	MIR320A	lncrna-mirna
GAS5	MIR320A	lncrna-mirna
LINC00174	MIR320A	lncrna-mirna
LINC00460	MIR320A	lncrna-mirna
MALAT1	MIR320A	lncrna-mirna
LINC00460	MIR320B-1	lncrna-mirna
XIST	MIR320B1	lncrna-mirna
RP11‑543N12.1	MIR324	lncrna-mirna
TPT1-AS1	MIR324	lncrna-mirna
DDX11-AS1	MIR326	lncrna-mirna
EWSAT1	MIR326	lncrna-mirna
HOTAIR	MIR326	lncrna-mirna
KCNQ1OT1	MIR326	lncrna-mirna
PCAT6	MIR326	lncrna-mirna
SNHG1	MIR326	lncrna-mirna
HOTAIR	MIR328	lncrna-mirna
LINC00210	MIR328	lncrna-mirna
MIAT	Mir328	lncrna-mirna
SNHG3	MIR328	lncrna-mirna
GAPLINC	MIR331	lncrna-mirna
HOTAIR	MIR331	lncrna-mirna
UCA1	MIR331	lncrna-mirna
CASC9	MIR335	lncrna-mirna
DANCR	MIR335	lncrna-mirna
NEAT1	MIR335	lncrna-mirna
SNHG8	MIR335	lncrna-mirna
XIST	MIR337	lncrna-mirna
DSCAM-AS1	MIR338	lncrna-mirna
LINC00460	MIR338	lncrna-mirna
OIP5-AS1	MIR338	lncrna-mirna
SNHG1	MIR338	lncrna-mirna
SNHG20	MIR338	lncrna-mirna
LINC00467	MIR339	lncrna-mirna
CASC15	MIR33A	lncrna-mirna
CRNDE	MIR33A	lncrna-mirna
EGOT	MIR33A	lncrna-mirna
LINC01003	MIR33A	lncrna-mirna
EGOT	MIR33B	lncrna-mirna
LINC00641	MIR340	lncrna-mirna
LINC01354	MIR340	lncrna-mirna
OIP5‑AS1	MIR340	lncrna-mirna
RUSC1-AS1	MIR340	lncrna-mirna
LINC00210	MIR342	lncrna-mirna
LINC00460	MIR342	lncrna-mirna
NEAT1	MIR342	lncrna-mirna
SNHG7	MIR342	lncrna-mirna
MEG3	MIR345	lncrna-mirna
DGCR5	MIR346	lncrna-mirna
GAPLINC	MIR34A	lncrna-mirna
GAS5	MIR34A	lncrna-mirna
HOTAIR	MIR34A	lncrna-mirna
KCNQ1OT1	MIR34A	lncrna-mirna
LINC00662	MIR34A	lncrna-mirna
MALAT1	MIR34A	lncrna-mirna
MIAT	MIR34A	lncrna-mirna
NEAT1	MIR34A	lncrna-mirna
SNHG7	MIR34A	lncrna-mirna
TP73‑AS1	MIR34A	lncrna-mirna
XIST	Mir34a	lncrna-mirna
NEAT1	Mir34c	lncrna-mirna
LINC00460	MIR361	lncrna-mirna
SNHG1	MIR361	lncrna-mirna
DGCR5	MIR3619	lncrna-mirna
PVT1	MIR3619	lncrna-mirna
SBF2-AS1	MIR362	lncrna-mirna
SNHG1	Mir362	lncrna-mirna
FEZF1-AS1	MIR363	lncrna-mirna
LINC00858	MIR363	lncrna-mirna
MALAT1	MIR363	lncrna-mirna
NNT-AS1	MIR363	lncrna-mirna
OIP5-AS1	MIR363	lncrna-mirna
NEAT1	MIR365A	lncrna-mirna
RPL34‐AS1	MIR3663	lncrna-mirna
NNT-AS1	MIR3666	lncrna-mirna
XIST	MIR367	lncrna-mirna
OIP5-AS1	MIR369	lncrna-mirna
CASC9	MIR370	lncrna-mirna
SNHG16	MIR370	lncrna-mirna
HULC	MIR372	lncrna-mirna
HOTAIR	MIR373	lncrna-mirna
HULC	MIR373	lncrna-mirna
MSC‑AS1	MIR373	lncrna-mirna
MALAT1	MIR374B	lncrna-mirna
LUCAT1	MIR375	lncrna-mirna
MALAT1	MIR375	lncrna-mirna
SNHG17	MIR375	lncrna-mirna
XIST	MIR375	lncrna-mirna
MALAT1	MIR376A1	lncrna-mirna
OIP5-AS1	MIR377	lncrna-mirna
SNHG1	MIR377	lncrna-mirna
SNHG4	MIR377	lncrna-mirna
SNHG7	MIR378A	lncrna-mirna
CDKN2B-AS1	MIR378B	lncrna-mirna
CASC9	Mir381	lncrna-mirna
DLEU1	MIR381	lncrna-mirna
SNHG15	MIR381	lncrna-mirna
SNHG7	MIR381	lncrna-mirna
TMPO-AS1	MIR381	lncrna-mirna
SNHG1	MIR382	lncrna-mirna
SNHG14	MIR382	lncrna-mirna
CRNDE	MIR384	lncrna-mirna
DSCAM-AS1	MIR384	lncrna-mirna
MALAT1	MIR384	lncrna-mirna
NEAT1	MIR384	lncrna-mirna
HOTAIRM1	MIR3960	lncrna-mirna
NEAT1	MIR410	lncrna-mirna
PCED1B-AS1	MIR411	lncrna-mirna
MEG3	MIR421	lncrna-mirna
ZFAS1	Mir421	lncrna-mirna
DUXAP8	MIR422A	lncrna-mirna
GACAT1	MIR422A	lncrna-mirna
LINC01133	MIR422A	lncrna-mirna
SNHG4	Mir423	lncrna-mirna
CDKN2B-AS1	MIR424	lncrna-mirna
KCNQ1OT1	MIR424	lncrna-mirna
NEAT1	MIR424	lncrna-mirna
SNHG1	MIR424	lncrna-mirna
SNHG16	MIR424	lncrna-mirna
LINC00899	MIR425	lncrna-mirna
MHENCR	MIR425	lncrna-mirna
CRNDE	MIR4262	lncrna-mirna
LINC00472	MIR4270	lncrna-mirna
MALAT1	MIR429	lncrna-mirna
DLX6-AS1	MIR4290	lncrna-mirna
KCNMB2-AS1	MIR4294	lncrna-mirna
FBXL19-AS1	MIR431	lncrna-mirna
SBF2-AS1	MIR431	lncrna-mirna
CASC15	MIR4310	lncrna-mirna
DANCR	MIR4319	lncrna-mirna
ZFAS1	MIR432	lncrna-mirna
PCGEM1	MIR433	lncrna-mirna
DLEU1	MIR4429	lncrna-mirna
PSMA3-AS1	MIR4429	lncrna-mirna
NEAT1	MIR448	lncrna-mirna
OIP5-AS1	MIR448	lncrna-mirna
SNHG20	MIR4486	lncrna-mirna
NEAT1	MIR449B	lncrna-mirna
SNHG4	Mir449c	lncrna-mirna
MEG3	MIR4513	lncrna-mirna
PART1	MIR4516	lncrna-mirna
SNHG16	MIR4518	lncrna-mirna
CRNDE	MIR451A	lncrna-mirna
SNHG12	MIR451A	lncrna-mirna
HOTAIR	MIR454	lncrna-mirna
XIST	MIR454	lncrna-mirna
SNHG16	Mir455	lncrna-mirna
HCP5	MIR4656	lncrna-mirna
TTN‐AS1	MIR4677	lncrna-mirna
SFTA1P	MIR4766	lncrna-mirna
TRPC7-AS1	MIR4769	lncrna-mirna
PGM5-AS1	MIR484	lncrna-mirna
ZFAS1	MIR484	lncrna-mirna
lnc-PICSAR	MIR485	lncrna-mirna
SNHG16	MIR485	lncrna-mirna
SNHG3	Mir485	lncrna-mirna
UCA1	MIR485	lncrna-mirna
ZFAS1	MIR486-1	lncrna-mirna
MIAT	MIR488	lncrna-mirna
PVT1	MIR488	lncrna-mirna
LEF1-AS1	MIR489	lncrna-mirna
MHENCR	MIR489	lncrna-mirna
MIR503HG	MIR489	lncrna-mirna
SNHG1	MIR489	lncrna-mirna
DLEU1	MIR490	lncrna-mirna
SNHG16	MIR490	lncrna-mirna
LBX2-AS1	MIR491	lncrna-mirna
NEAT1	MIR491	lncrna-mirna
SNHG8	MIR491	lncrna-mirna
FGD5-AS1	MIR493	lncrna-mirna
LUCAT1	MIR493	lncrna-mirna
NR2F1-AS1	MIR493	lncrna-mirna
NNT-AS1	MIR494	lncrna-mirna
WT1-AS	MIR494	lncrna-mirna
XIST	MIR494	lncrna-mirna
NEAT1	MIR495	lncrna-mirna
NORAD	MIR495	lncrna-mirna
SNHG20	MIR495	lncrna-mirna
SNHG20.	MIR495	lncrna-mirna
UCA1	MIR495	lncrna-mirna
DANCR	MIR496	lncrna-mirna
AFAP1-AS1	MIR497	lncrna-mirna
DLX6-AS1	MIR497	lncrna-mirna
GACAT3	MIR497	lncrna-mirna
LINC00641	Mir497	lncrna-mirna
LINC00662	MIR497	lncrna-mirna
PVT1	MIR497	lncrna-mirna
AFAP1-AS1	MIR498	lncrna-mirna
HOTAIRM1	MIR498	lncrna-mirna
NEAT1	MIR500A	lncrna-mirna
PART1	MIR503	lncrna-mirna
KCNQ1OT1	miR504	lncrna-mirna
DGCR5	MIR506	lncrna-mirna
DLX6-AS1	MIR506	lncrna-mirna
KCNQ1OT1	MIR506	lncrna-mirna
MALAT1	MIR506	lncrna-mirna
NEAT1	MIR506	lncrna-mirna
SNHG15	MIR506	lncrna-mirna
MIR4435‑2HG	MIR510	lncrna-mirna
SNHG12	MIR516A1	lncrna-mirna
HOXA11‐AS	MIR518B	lncrna-mirna
LINC01419	MIR519B	lncrna-mirna
PVT1	MIR519D	lncrna-mirna
LINC00511	MIR524	lncrna-mirna
TP53TG1	MIR524	lncrna-mirna
TTN-AS1	MIR524	lncrna-mirna
LOXL1-AS1	MIR525	lncrna-mirna
PVT1	MIR526B	lncrna-mirna
GAS5	Mir532	lncrna-mirna
LINC01410	MIR532	lncrna-mirna
LINC00460	MIR539	lncrna-mirna
SNHG8	MIR542	lncrna-mirna
HCG11	MIR543	lncrna-mirna
MEG3	MIR543	lncrna-mirna
NEAT1	MIR543	lncrna-mirna
PCAT6	MIR543	lncrna-mirna
PVT1	MIR543	lncrna-mirna
LEF1‐AS1	MIR544A	lncrna-mirna
MALAT1	MIR558	lncrna-mirna
MIR100HG	MIR5590	lncrna-mirna
PTCSC3	MIR574	lncrna-mirna
DANCR	MIR577	lncrna-mirna
DSCAM-AS1	MIR577	lncrna-mirna
DUXAP8	MIR577	lncrna-mirna
LINC01094	MIR577	lncrna-mirna
LINC00485	MIR581	lncrna-mirna
UCA1	MIR582	lncrna-mirna
HAND2-AS1	MIR590	lncrna-mirna
MALAT1	MIR590	lncrna-mirna
NORAD	MIR590	lncrna-mirna
PART1	MIR590	lncrna-mirna
ZFAS1	MIR590	lncrna-mirna
RHPN1-AS1	MIR596	lncrna-mirna
XIST	MIR599	lncrna-mirna
LINC00963	MIR612	lncrna-mirna
LUCAT1	MIR612	lncrna-mirna
HOTAIR	MIR613	lncrna-mirna
LINC00460	MIR613	lncrna-mirna
MALAT1	MIR613	lncrna-mirna
TUSC7	MIR616	lncrna-mirna
MIR503HG	MIR625	lncrna-mirna
RHPN1-AS1	MIR625	lncrna-mirna
UCA1	MIR627	lncrna-mirna
HOTTIP	MIR637	lncrna-mirna
PCGEM1	MIR642A	lncrna-mirna
SOX2-OT	MIR654	lncrna-mirna
UCA1	MIR654	lncrna-mirna
NORAD	MIR656	lncrna-mirna
SNHG8	MIR656	lncrna-mirna
MEG3	MIR664A	lncrna-mirna
RASSF8‑AS1	MIR664B	lncrna-mirna
BCAR4	MIR665	lncrna-mirna
DLEU1	MIR671	lncrna-mirna
MACC1‑AS1	MIR6867	lncrna-mirna
MCM3AP-AS1	MIR708	lncrna-mirna
KCNQ1OT1	MIR760	lncrna-mirna
LINC01561	MIR760	lncrna-mirna
LINC00511	MIR765	lncrna-mirna
CASC15	MIR766	lncrna-mirna
HAND2-AS1	MIR769	lncrna-mirna
MALAT1	MIR769	lncrna-mirna
PCGEM1	MIR770	lncrna-mirna
SNHG16	Mir770	lncrna-mirna
DDX11-AS1	MIR873	lncrna-mirna
DGCR5	MIR873	lncrna-mirna
UCA1	MIR873	lncrna-mirna
HOTAIR	MIR874	lncrna-mirna
HOXB‑AS3	MIR875	lncrna-mirna
SNHG8	MIR876	lncrna-mirna
DNAH17-AS1	MIR877	lncrna-mirna
ZFAS1	MIR892B	lncrna-mirna
SNHG7	Mir9-2	lncrna-mirna
MEG3	MIR93	lncrna-mirna
PART1	MIR93	lncrna-mirna
TDRG1	MIR93	lncrna-mirna
HEIH	MIR939	lncrna-mirna
HCG11	MIR942	lncrna-mirna
ZEB1-AS1	MIR942	lncrna-mirna
MALAT1	MIR96	lncrna-mirna
UCA1	MIR96	lncrna-mirna
OIP5‑AS1	MIR98	lncrna-mirna
NUTM2A-AS1	MIRLET7C	lncrna-mirna
NEAT1	MIRLET7G	lncrna-mirna
XIST	MIRLET7I	lncrna-mirna
MEG3	miRNA-9	lncrna-mirna
PVT1	miRNA-9	lncrna-mirna
SNHG15	miRNA-9	lncrna-mirna
UCA1	miRNA-9	lncrna-mirna
XIST	miRNA-9	lncrna-mirna

## Sheet: lncRNA-mRNA
MALAT1	ABCA1	lncrna-gene
FENDRR	ABCB1	lncrna-gene
KCNQ1OT1	ABCB1	lncrna-gene
MEG3	ABCB1	lncrna-gene
PVT1	ABCB1	lncrna-gene
UCA1	ABCB1	lncrna-gene
FENDRR	ABCC1	lncrna-gene
HOTAIR	ABCC1	lncrna-gene
MEG3	ABCC1	lncrna-gene
PVT1	ABCC1	lncrna-gene
SNHG5	ABCC2	lncrna-gene
DANCR	ABCG2	lncrna-gene
MEG3	ABCG2	lncrna-gene
LSINCT5	ACTR2	lncrna-gene
MALAT1	ADAMTS12	lncrna-gene
HOTAIR	ADAMTS5	lncrna-gene
NEAT1	Adamts5	lncrna-gene
NEAT1	ADARB2	lncrna-gene
MALAT1	ADGRL2	lncrna-gene
KCNQ1OT1	ADIPOR1	lncrna-gene
AFAP1-AS1	AFAP1	lncrna-gene
AFAP1-AS1	AKT1	lncrna-gene
HOTAIR	AKT1	lncrna-gene
MALAT1	AKT1	lncrna-gene
UCA1	AKT1	lncrna-gene
UCA1	AKT3	lncrna-gene
MIR600HG	ALDH1A3	lncrna-gene
SNHG12	AMOT	lncrna-gene
HOTAIR	ANGPT2	lncrna-gene
PVT1	ANGPTL4	lncrna-gene
LSINCT5	ANKFY1	lncrna-gene
HULC	ANKRD11	lncrna-gene
GAS5	ANXA2	lncrna-gene
GAS5	APAF1	lncrna-gene
HOTAIR	AR	lncrna-gene
HOTAIR	ARID4A	lncrna-gene
UCA1	ARNT2	lncrna-gene
GHET1	ATF1	lncrna-gene
MEG3	ATG3	lncrna-gene
GAS8-AS1	ATG5	lncrna-gene
XIST	ATG7	lncrna-gene
UCA1	ATM	lncrna-gene
MINCR	AURKA	lncrna-gene
BACE1-AS	BACE1	lncrna-gene
AFAP1-AS1	BAX	lncrna-gene
HOTTIP	BAX	lncrna-gene
MNX1-AS1	BAX	lncrna-gene
ZEB1-AS1	BAX	lncrna-gene
PANDAR	BBC3	lncrna-gene
AFAP1-AS1	BCL2	lncrna-gene
CASC2	BCL2	lncrna-gene
CCDC26	BCL2	lncrna-gene
HOTAIR	BCL2	lncrna-gene
HOTTIP	BCL2	lncrna-gene
MEG3	BCL2	lncrna-gene
MNX1-AS1	BCL2	lncrna-gene
XIST	BCL2	lncrna-gene
ZEB1-AS1	BCL2	lncrna-gene
UCA1	BCR	lncrna-gene
BDNF-AS	BDNF	lncrna-gene
PANDAR	BMI1	lncrna-gene
SNHG12	BMI1	lncrna-gene
MEG3	BMP4	lncrna-gene
MALAT1	BMPER	lncrna-gene
BISPR	BST2	lncrna-gene
SAMMSON	C1QBP	lncrna-gene
MALAT1	CA2	lncrna-gene
HOTAIR	CACNA1C	lncrna-gene
NEAT1	CALCR	lncrna-gene
AFAP1-AS1	CASP3	lncrna-gene
HOTAIR	CASP3	lncrna-gene
MALAT1	CASP3	lncrna-gene
MEG3	CASP3	lncrna-gene
PVT1	CASP3	lncrna-gene
UCA1	CASP3	lncrna-gene
MEG3	CASP8	lncrna-gene
AFAP1-AS1	CASP9	lncrna-gene
MALAT1	CASP9	lncrna-gene
MEG3	CASP9	lncrna-gene
PVT1	CASP9	lncrna-gene
HOTAIR	CAV1	lncrna-gene
MALAT1	CCAR2	lncrna-gene
ILF3-AS1	CCDC148-AS1	lncrna-gene
MALAT1	CCL2	lncrna-gene
AFAP1-AS1	CCND1	lncrna-gene
DBH-AS1	CCND1	lncrna-gene
EGOT	CCND1	lncrna-gene
GAS5	CCND1	lncrna-gene
MALAT1	CCND1	lncrna-gene
UCA1	CCND1	lncrna-gene
ZEB1-AS1	CCND1	lncrna-gene
CRNDE	CCNE1	lncrna-gene
DBH-AS1	CCNE1	lncrna-gene
HOTAIR	CCNE1	lncrna-gene
MALAT1	CCT4	lncrna-gene
MALAT1	CD36	lncrna-gene
DANCR	CD44	lncrna-gene
GAPLINC	CD44	lncrna-gene
HOTAIR	CD82	lncrna-gene
BDNF-AS	CDC42	lncrna-gene
LINC00707	CDC42	lncrna-gene
HULC	CDCA4	lncrna-gene
MALAT1	CDCP1	lncrna-gene
BANCR	CDH1	lncrna-gene
BCAR4	CDH1	lncrna-gene
CLMAT3	CDH1	lncrna-gene
FEZF1-AS1	CDH1	lncrna-gene
GHET1	CDH1	lncrna-gene
HOTAIR	CDH1	lncrna-gene
LINC00261	CDH1	lncrna-gene
MALAT1	CDH1	lncrna-gene
XIST	CDH1	lncrna-gene
ZEB1-AS1	CDH1	lncrna-gene
ZFAS1	CDH1	lncrna-gene
BANCR	CDH2	lncrna-gene
BCAR4	CDH2	lncrna-gene
CCND2-AS1	CDH2	lncrna-gene
LINC00261	CDH2	lncrna-gene
MALAT1	CDH2	lncrna-gene
PANDAR	CDH2	lncrna-gene
SNHG1	CDH2	lncrna-gene
ZEB1-AS1	CDH2	lncrna-gene
ZFAS1	CDH2	lncrna-gene
MALAT1	CDH5	lncrna-gene
ZEB1-AS1	CDK2	lncrna-gene
CRNDE	CDK4	lncrna-gene
MNX1-AS1	CDK4	lncrna-gene
CRNDE	CDK6	lncrna-gene
DBH-AS1	CDK6	lncrna-gene
GAS5	CDK6	lncrna-gene
HULC	CDK8	lncrna-gene
BANCR	CDKN1A	lncrna-gene
CRNDE	CDKN1A	lncrna-gene
DBH-AS1	CDKN1A	lncrna-gene
GAS5	CDKN1A	lncrna-gene
HEIH	CDKN1A	lncrna-gene
HOTAIR	CDKN1A	lncrna-gene
HOTTIP	CDKN1A	lncrna-gene
HOXA-AS2	CDKN1A	lncrna-gene
MALAT1	CDKN1A	lncrna-gene
MIR31HG	CDKN1A	lncrna-gene
SNHG1	CDKN1A	lncrna-gene
SNHG20	CDKN1A	lncrna-gene
UCA1	CDKN1A	lncrna-gene
DBH-AS1	CDKN1B	lncrna-gene
GAS5	CDKN1B	lncrna-gene
MALAT1	CDKN1B	lncrna-gene
HEIH	CDKN1C	lncrna-gene
SNHG16	CDKN1C	lncrna-gene
SOX21-AS1	CDKN1C	lncrna-gene
DBH-AS1	CDKN2A	lncrna-gene
HEIH	CDKN2A	lncrna-gene
MIAT	CDKN2A	lncrna-gene
PANDAR	CDKN2A	lncrna-gene
HEIH	CDKN2B	lncrna-gene
IRAIN	CDKN2B	lncrna-gene
UCA1	CDKN2B	lncrna-gene
HULC	CDKN2C	lncrna-gene
MINCR	CDT1	lncrna-gene
HULC	CEP83	lncrna-gene
MALAT1	CLDN5	lncrna-gene
BDNF-AS	CLN3	lncrna-gene
PVT1	COL4A1	lncrna-gene
MALAT1	COL6A1	lncrna-gene
MALAT1	CPM	lncrna-gene
UCA1	CREB	lncrna-gene
UCA1	CREB1	lncrna-gene
UCA1	CRKL	lncrna-gene
MALAT1	CSF1	lncrna-gene
MALAT1	CTHRC1	lncrna-gene
DANCR	CTNNB1	lncrna-gene
MALAT1	CTNNB1	lncrna-gene
PANDAR	CTNNB1	lncrna-gene
HULC	CWF19L1	lncrna-gene
MALAT1	CXCL5	lncrna-gene
LSINCT5	CXCR4	lncrna-gene
UCA1	CXCR4	lncrna-gene
GSEC	DHX36	lncrna-gene
HOTAIR	DNMT1	lncrna-gene
LUCAT1	DNMT1	lncrna-gene
MALAT1	DRD1	lncrna-gene
CRNDE	DUSP5	lncrna-gene
LINC01503	DUSP6	lncrna-gene
MIAT	DUSP7	lncrna-gene
GAS5	E2F1	lncrna-gene
HULC	E2F1	lncrna-gene
CRNDE	E2f3	lncrna-gene
HOTAIR	E7	lncrna-gene
LINC00265	EGFR	lncrna-gene
GAS5	EIF4E	lncrna-gene
EMX2OS	EMX2	lncrna-gene
UCA1	EP300	lncrna-gene
UCA1	EPAS1	lncrna-gene
HAS2-AS1	EPHB3	lncrna-gene
LSINCT5	EPPK1	lncrna-gene
HOTAIR	ERBB2	lncrna-gene
BANCR	ERK1	lncrna-gene
CASC15	EZH2	lncrna-gene
DANCR	EZH2	lncrna-gene
HOTAIR	EZH2	lncrna-gene
HOXA-AS2	EZH2	lncrna-gene
HULC	EZH2	lncrna-gene
LINC00320	EZH2	lncrna-gene
MALAT1	EZH2	lncrna-gene
MEG3	EZH2	lncrna-gene
NEAT1	EZH2	lncrna-gene
PVT1	EZH2	lncrna-gene
SNHG15	EZH2	lncrna-gene
SNHG20	EZH2	lncrna-gene
XIST	EZH2	lncrna-gene
MIR31HG	FABP4	lncrna-gene
SNHG7	FAIM2	lncrna-gene
UCA1	FAS	lncrna-gene
HOTAIR	FASN	lncrna-gene
ZFHX4-AS1	FAT4	lncrna-gene
SNHG16	FBXW7	lncrna-gene
FEZF1-AS1	FEZF1	lncrna-gene
GAS5	FGF1	lncrna-gene
UCA1	FGF1	lncrna-gene
CASC8	FGFR1	lncrna-gene
GHET1	FN1	lncrna-gene
MALAT1	FN1	lncrna-gene
PVT1	FN1	lncrna-gene
UCA1	FN1	lncrna-gene
FOXCUT	FOXC1	lncrna-gene
FENDRR	FOXF1	lncrna-gene
LINC01081	FOXF1	lncrna-gene
PVT1	FOXM1	lncrna-gene
DANCR	FOXO1	lncrna-gene
LINC00963	FOXO3	lncrna-gene
MALAT1	FSD1	lncrna-gene
UCA1	FSD1	lncrna-gene
NEAT1	FUS	lncrna-gene
UCA1	FZD5	lncrna-gene
LINC01980	GADD45A	lncrna-gene
UCA1	GDE1	lncrna-gene
BANCR	GEMIN2	lncrna-gene
HULC	GGT1	lncrna-gene
BCAR4	GLI2	lncrna-gene
GPC3-AS1	GPC3	lncrna-gene
MALAT1	GPC6	lncrna-gene
NEAT1	GPHA2	lncrna-gene
DANCR	GSK3B	lncrna-gene
UCA1	GSK3B	lncrna-gene
GAS5	GSTM3	lncrna-gene
HNF1A-AS1	H19	lncrna-gene
SMILR	HAS2	lncrna-gene
MIAT	HDAC4	lncrna-gene
LSINCT5	HERC1	lncrna-gene
UCA1	HES1	lncrna-gene
HOTAIR	HIF1A	lncrna-gene
MIR31HG	HIF1A	lncrna-gene
PVT1	HIF1A	lncrna-gene
NEAT1	HIV-1	lncrna-gene
HULC	HMGA2	lncrna-gene
MALAT1	HMGB1	lncrna-gene
MALAT1	HMMR	lncrna-gene
MALAT1	HNF4G	lncrna-gene
HOTTIP	HOXA@	lncrna-gene
HOTAIRM1	HOXA1	lncrna-gene
HOTTIP	HOXA10	lncrna-gene
HOTTIP	HOXA11	lncrna-gene
HOTTIP	HOXA13	lncrna-gene
HOTAIRM1	HOXA4	lncrna-gene
SNHG1	HOXA4	lncrna-gene
HOTAIR	HOXA5	lncrna-gene
HOTTIP	HOXA7	lncrna-gene
HOTTIP	HOXA9	lncrna-gene
TP53TG1	HSPA5	lncrna-gene
HOTAIR	HuR	lncrna-gene
TP53TG1	IDH1	lncrna-gene
GAS5	IGF1R	lncrna-gene
GAS5	IL10	lncrna-gene
ZEB1-AS1	ITGB1	lncrna-gene
HULC	IWS1	lncrna-gene
KCNQ1OT1	Kcnq1	lncrna-gene
FEZF1-AS1	KDM1A	lncrna-gene
HOXA-AS2	KDM1A	lncrna-gene
IRAIN	KDM1A	lncrna-gene
MEG3	KDR	lncrna-gene
CCDC26	KIT	lncrna-gene
GHET1	KLF2	lncrna-gene
HOXA-AS2	KLF2	lncrna-gene
IRAIN	KLF2	lncrna-gene
LINC01133	KLF2	lncrna-gene
SNHG15	KLF2	lncrna-gene
XIST	KLF2	lncrna-gene
ZFAS1	KLF2	lncrna-gene
SNHG5	KLF4	lncrna-gene
MIAT	KMT2A	lncrna-gene
AFAP1-AS1	KRT1	lncrna-gene
KRT7-AS	KRT7	lncrna-gene
LINP1	KU80	lncrna-gene
UCA1	LAMA3	lncrna-gene
HOTAIR	LAMB3	lncrna-gene
CASC9	LAMC2	lncrna-gene
HOTAIR	LAMC2	lncrna-gene
PVT1	LATS2	lncrna-gene
MALAT1	LAYN	lncrna-gene
MEG3	LC3-II	lncrna-gene
LINC00963	LILRB2	lncrna-gene
LINC00305	LMBR1L	lncrna-gene
MIR2052HG	LMTK3	lncrna-gene
KCNQ1OT1	LMX1A	lncrna-gene
MALAT1	LPAR1	lncrna-gene
PTCSC3	LRP6	lncrna-gene
MALAT1	LTBP1	lncrna-gene
MALAT1	LTBP3	lncrna-gene
HULC	LTBR	lncrna-gene
MALAT1	LY6K	lncrna-gene
GAS5	Mafa	lncrna-gene
MALAT1	MAP2K1	lncrna-gene
MALAT1	MAP2K2	lncrna-gene
BANCR	MAPK1	lncrna-gene
MALAT1	MAPK1	lncrna-gene
UCA1	MAPK1	lncrna-gene
MALAT1	MAPK10	lncrna-gene
BANCR	MAPK3	lncrna-gene
MALAT1	MAPK3	lncrna-gene
NEAT1	MAPK6	lncrna-gene
BANCR	MAPK8	lncrna-gene
HOTAIR	MAPK8	lncrna-gene
MALAT1	MAPK8	lncrna-gene
LSINCT5	MAPK9	lncrna-gene
MALAT1	MAPK9	lncrna-gene
MALAT1	MCAM	lncrna-gene
PVT1	MCL1	lncrna-gene
MEG3	MDM2	lncrna-gene
MALAT1	MIA2	lncrna-gene
HULC	MKNK2	lncrna-gene
BANCR	MMP1	lncrna-gene
HOTAIR	MMP1	lncrna-gene
NEAT1	Mmp13	lncrna-gene
SNHG12	MMP13	lncrna-gene
MALAT1	MMP14	lncrna-gene
AFAP1-AS1	MMP2	lncrna-gene
BANCR	MMP2	lncrna-gene
FENDRR	MMP2	lncrna-gene
FOXCUT	MMP2	lncrna-gene
GAS5	MMP2	lncrna-gene
MALAT1	MMP2	lncrna-gene
SNHG15	MMP2	lncrna-gene
ZEB1-AS1	MMP2	lncrna-gene
HOTAIR	MMP3	lncrna-gene
FOXCUT	MMP7	lncrna-gene
AFAP1-AS1	MMP9	lncrna-gene
BANCR	MMP9	lncrna-gene
FENDRR	MMP9	lncrna-gene
FOXCUT	MMP9	lncrna-gene
HOTAIR	MMP9	lncrna-gene
MALAT1	MMP9	lncrna-gene
PVT1	MMP9	lncrna-gene
SNHG15	MMP9	lncrna-gene
ZEB1-AS1	MMP9	lncrna-gene
HULC	MORC2	lncrna-gene
PVT1	MTOR	lncrna-gene
UCA1	MTOR	lncrna-gene
MALAT1	MYBL2	lncrna-gene
AFAP1-AS1	MYC	lncrna-gene
DANCR	MYC	lncrna-gene
lncRNA-GHET1	MYC	lncrna-gene
MALAT1	MYC	lncrna-gene
PCAT6	MYC	lncrna-gene
PCGEM1	MYC	lncrna-gene
PVT1	MYC	lncrna-gene
RBM5-AS1	MYC	lncrna-gene
AFAP1-AS1	NANOG	lncrna-gene
PVT1	NCL	lncrna-gene
HULC	NDUFC2	lncrna-gene
LSINCT5	NEAT1	lncrna-gene
AFAP1-AS1	NES	lncrna-gene
HULC	NF195	lncrna-gene
MIAT	NFE2L2	lncrna-gene
MIR31HG	NFKB1	lncrna-gene
PANDAR	NFYA	lncrna-gene
ZFAS1	NKD2	lncrna-gene
MALAT1	NNMT	lncrna-gene
HULC	NNT	lncrna-gene
HULC	NOP53	lncrna-gene
MEG3	Notch1	lncrna-gene
SNHG1	Notch1	lncrna-gene
SNHG12	NOTCH2	lncrna-gene
RAMP2-AS1	NOTCH3	lncrna-gene
DANCR	NPTN-IT1	lncrna-gene
FEZF1-AS1	NUPR1	lncrna-gene
MALAT1	OCLN	lncrna-gene
MEG3	osteocalcin	lncrna-gene
MIR31HG	P21	lncrna-gene
DANCR	p38	lncrna-gene
SNHG14	PABPC1	lncrna-gene
AFAP1-AS1	PARP1	lncrna-gene
MIR31HG	PcG	lncrna-gene
CCDC26	PCNA	lncrna-gene
MALAT1	PCNA	lncrna-gene
CASC9	PDCD4	lncrna-gene
UCA1	PDGFB	lncrna-gene
FTX	PDK1	lncrna-gene
LSINCT5	PDPK1	lncrna-gene
GAS5	Pdx1	lncrna-gene
NEAT1	Pidd1	lncrna-gene
MALAT1	PIK3CB	lncrna-gene
NEAT1	Pink1	lncrna-gene
TP53TG1	PKM	lncrna-gene
DUXAP8	PLEKHO1	lncrna-gene
GAS5	PPEF1	lncrna-gene
LINC00668	PRC2	lncrna-gene
LSINCT5	PRKAA1	lncrna-gene
UCA1	PRKAR2A	lncrna-gene
MALAT1	PRKCE	lncrna-gene
LSINCT5	PSPC1	lncrna-gene
MALAT1	PTBP3	lncrna-gene
PVT1	PTCH1	lncrna-gene
AFAP1-AS1	PTEN	lncrna-gene
CASC2	PTEN	lncrna-gene
GAS5	PTEN	lncrna-gene
HOTAIR	PTEN	lncrna-gene
HULC	PTGS2	lncrna-gene
MIAT	PTGS2	lncrna-gene
UCA1	PTGS2	lncrna-gene
MALAT1	PTK2	lncrna-gene
HNF1A-AS1	PTPN6	lncrna-gene
MALAT1	PXN	lncrna-gene
HOTAIR	QKI	lncrna-gene
MEG3	RAC2	lncrna-gene
BANCR	RAF1	lncrna-gene
MALAT1	RAP1B	lncrna-gene
MALAT1	RASSF6	lncrna-gene
HOTAIR	RB1	lncrna-gene
HOTAIR	RBM38	lncrna-gene
MALAT1	ROBO1	lncrna-gene
HULC	RPRD1A	lncrna-gene
CASC2	RUNX1	lncrna-gene
MEG3	RUNX2	lncrna-gene
TSIX	Runx2	lncrna-gene
HOTAIR	RUNX3	lncrna-gene
HULC	SDC4	lncrna-gene
PVT1	SERPINE1	lncrna-gene
HOTAIR	SETD2	lncrna-gene
MALAT1	SFRP1	lncrna-gene
HOTTIP	SGK1	lncrna-gene
RBM5-AS1	SGK1	lncrna-gene
HULC	SH3D19	lncrna-gene
HOTAIR	SIRT1	lncrna-gene
AFAP1-AS1	SMAD2	lncrna-gene
DANCR	SMAD3	lncrna-gene
GAS5	SMAD3	lncrna-gene
PVT1	SMAD4	lncrna-gene
AFAP1-AS1	SNAI1	lncrna-gene
BANCR	SNAI1	lncrna-gene
HOTAIR	SNAI1	lncrna-gene
PANDAR	SNAI1	lncrna-gene
AFAP1-AS1	SNAI2	lncrna-gene
BANCR	SNAI2	lncrna-gene
LINC00261	SNAI2	lncrna-gene
MALAT1	SNAI2	lncrna-gene
UCA1	SNAI2	lncrna-gene
HULC	SNAPC2	lncrna-gene
MALAT1	SNCA	lncrna-gene
AFAP1-AS1	SOX2	lncrna-gene
CASC15	SOX4	lncrna-gene
CASC2	SOX4	lncrna-gene
MALAT1	SP1	lncrna-gene
XIAP-AS1	SP1	lncrna-gene
MEG3	SP7	lncrna-gene
NEAT1	SRp40	lncrna-gene
HCP5	ST6GAL2	lncrna-gene
DANCR	STAT3	lncrna-gene
PTCSC3	STAT3	lncrna-gene
SNHG5	STAU1	lncrna-gene
MALAT1	STC1	lncrna-gene
UCA1	SUFU	lncrna-gene
LUADT1	SUZ12	lncrna-gene
SBF2-AS1	SUZ12	lncrna-gene
HULC	TBCB	lncrna-gene
DANCR	TFF3	lncrna-gene
CASC2	TGFB1	lncrna-gene
PVT1	TGFB1	lncrna-gene
UCA1	TGFB1	lncrna-gene
DANCR	TIMP3	lncrna-gene
HOTAIR	TJP1	lncrna-gene
MALAT1	TJP1	lncrna-gene
ZFAS1	TJP1	lncrna-gene
HULC	TM9SF3	lncrna-gene
HOTAIR	TNFRSF10B	lncrna-gene
HOXA-AS2	TNFSF10	lncrna-gene
SOCS2-AS1	TNFSF10	lncrna-gene
LINC01305	TNXB	lncrna-gene
GAS5	TP53	lncrna-gene
HOTAIR	TP53	lncrna-gene
MALAT1	TP53	lncrna-gene
MEG3	TP53	lncrna-gene
PANDAR	TP53	lncrna-gene
PCAT6	TP53	lncrna-gene
PRAL	TP53	lncrna-gene
SFTA1P	TP53	lncrna-gene
SNHG1	TP53	lncrna-gene
lncRNARP1‑85F18.6(ENST00000415054)	TP63	lncrna-gene
MEG3	TRIB2	lncrna-gene
TRPM2-AS	TRPM2	lncrna-gene
PVT1	TSHR	lncrna-gene
AFAP1-AS1	TWIST1	lncrna-gene
BANCR	TWIST1	lncrna-gene
HOTAIR	TWIST1	lncrna-gene
PANDAR	TWIST1	lncrna-gene
XIST	TYMS	lncrna-gene
MEG3	UBE2B	lncrna-gene
HULC	UBE2I	lncrna-gene
FOXCUT	VEGFA	lncrna-gene
GAS5	VEGFA	lncrna-gene
HOTAIR	VEGFA	lncrna-gene
LINC01116	VEGFA	lncrna-gene
AFAP1-AS1	VIM	lncrna-gene
BANCR	VIM	lncrna-gene
BCAR4	VIM	lncrna-gene
CCND2-AS1	VIM	lncrna-gene
GAS5	VIM	lncrna-gene
GHET1	VIM	lncrna-gene
LINC00261	VIM	lncrna-gene
PANDAR	VIM	lncrna-gene
SNHG1	VIM	lncrna-gene
HULC	VPS4A	lncrna-gene
SNHG14	WASL	lncrna-gene
CASC15	WDR5	lncrna-gene
XIST	WDR5	lncrna-gene
HOTAIR	WIF1	lncrna-gene
UCA1	WNT5A	lncrna-gene
UCA1	WNT6	lncrna-gene
DLGAP1-AS2	YAP1	lncrna-gene
GHET1	YAP1	lncrna-gene
KCNQ1OT1	YAP1	lncrna-gene
RBM5-AS1	YAP1	lncrna-gene
UCA1	YAP1	lncrna-gene
GAS5	YBX1	lncrna-gene
AFAP1-AS1	ZEB1	lncrna-gene
HOTAIR	ZEB1	lncrna-gene
MALAT1	ZEB1	lncrna-gene
NEAT1	ZEB1	lncrna-gene
ZEB1-AS1	ZEB1	lncrna-gene
ZFAS1	ZEB1	lncrna-gene
MALAT1	ZEB2	lncrna-gene
MALAT1	ZNF174	lncrna-gene

## Sheet: lncRNA target list
lncRNA	miRNA	mRNA
HOTAIR	miR-1	ABCA1
HOTTIP	miR-101	ABCB1
MALAT1	miR-103	ABCC1
NEAT1	miR-124	ABCC2
SNHG1	miR-128	ABCG2
XIST	miR-129	ACTR2
GAS5	miR-135a	ADAMTS12
SNHG14	miR-138	ADAMTS5
KCNQ1OT1	miR-153	ADARB2
LINC00511	miR-15b	ADGRL2
OGFRP1	miR-16	ADIPOR1
HCP5	miR-181a	AFAP1
LINC00963	miR-181b	AKT1
MIR4435-2HG	miR-181c	AKT3
SNHG12	miR-181d	ALDH1A3
DANCR	miR-186	AMOT
MBNL1-AS1	miR-18a	ANGPT2
UCA1	miR-19	ANGPTL4
ZFAS1	miR-194	ANKFY1
MCM3AP-AS1	miR-195a	ANKRD11
OIP5-AS1	miR-20a	ANXA2
LINC00662	miR-218	APAF1
CASC2	miR-26a	AR
LUCAT1	miR-29	ARID4A
PVT1	miR-29b	ARNT2
DLX6-AS1	miR-30	ATF1
HOTAIRM1	miR-30b	ATG3
MEG3	miR-30c	ATG5
MIR155HG	miR-3118	ATG7
SNHG5	miR-34	ATM
DUXAP8	miR-376a	AURKA
HULC	miR-424	BACE1
TSIX	miR-512	BAX
DLEU2	miR-515	BBC3
LINC01139	miR-518a	BCL2
HAND2-AS1	miR-519a	BCR
SNHG7	miR-574	BDNF
TTN-AS1	miR-7	BMI1
AFAP1-AS1	miR-9	BMP4
ZFPM2-AS1	miR-133a	BMPER
SNHG3	miR-199a	BST2
HOXA11‑AS	MiR-219	C1QBP
SNHG15	MiR-376	CA2
LINC00682	MIR1-1	CACNA1C
LINC01116	MIR101	CALCR
RMRP	Mir105	CASP3
SNHG17	MIR106A	CASP8
KIF9‑AS1	MIR106B	CASP9
SNHG6	MIR107	CAV1
SOX2OT	MIR10A	CCAR2
DLX6‐AS1	MIR12116	CCDC148-AS1
TMPO‐AS1	MIR122	CCL2
PCA3	MIR124-1	CCND1
CCAT1	MIR1246	CCNE1
TNFSF10	Mir125	CCT4
ANRIL	MIR125A	CD36
GHET1	MIR125B	CD44
GAS5‑AS1	MIR125B1	CD82
LINC00958	MIR126	CDC42
LINC01133	MIR127	CDCA4
FEZF1-AS1	MIR1271	CDCP1
MEG8	MIR1277	CDH1
LINC01391	MIR128	CDH2
LINC01410	MIR128-1	CDH5
GABPB1-AS1	Mir129	CDK2
CASC9	MIR129-1	CDK4
NORAD	MIR1305	CDK6
BDNF-AS	MIR130A	CDK8
PICSAR	Mir130b	CDKN1A
FENDRR	MIR132	CDKN1B
PRNCR1	Mir133a-1	CDKN1C
CRNDE	Mir133a-2	CDKN2A
PCAT1	MIR133B	CDKN2B
ADAMTS9-AS2	MIR134	CDKN2C
KCNMB2-AS1	MIR135B	CDT1
APTR	MIR136	CEP83
BACE1‑AS	MIR137	CLDN5
MIAT	MIR138-1	CLN3
EGFR-AS1	Mir138-2	COL4A1
NCK1‑AS1	MIR139	COL6A1
DSCAM-AS1	MIR140	CPM
LINC01140	Mir141	CREB
SNHG16	MIR142	CREB1
NNT-AS1	MIR143	CRKL
CDKN2B-AS1	MIR144	CSF1
PSMG3‑AS1	MIR145	CTHRC1
TMPO‑AS1	Mir145a	CTNNB1
HCG11	MIR146A	CWF19L1
CASC15	MIR146B	CXCL5
PCGEM1	MIR148A	CXCR4
DLGAP1-AS1	MIR148B	DHX36
GACAT3	MIR149	DNMT1
HNF1A‐AS1	MIR150	DRD1
LINC00460	MIR152	DUSP5
LINC00472	MIR154	DUSP6
PART1	MIR155	DUSP7
ZEB2‐AS1	MIR15A	E2F1
LINC00449	MIR15B	E2f3
LINC01089	MIR16-1	E7
HNF1A-AS1	MIR17	EGFR
LINC01939	Mir18	EIF4E
OTUD6B-AS1	Mir181a-1	EMX2
NNT‑AS1	MIR181A1	EP300
MIR31HG	MIR181B1	EPAS1
DGCR5	MIR181D	EPHB3
TRPM2‐AS	MIR182	EPPK1
NBR2	MIR183	ERBB2
HEIH	MIR184	ERK1
LINC00467	MIR185	EZH2
CCDC26	MIR186	FABP4
FBXL19-AS1	Mir187	FAIM2
LINC00114	MIR188	FAS
LINC00342	MIR18A	FASN
ATXN8OS	MIR18B	FAT4
BANCR	MIR190A	FBXW7
DNM3OS	MIR192	FEZF1
RMST	MIR193A	FGF1
ADPGK-AS1	MIR193B	FGFR1
CACNA1G-AS1	MIR194-1	FN1
CYTOR	MIR195	FOXC1
ZEB1-AS1	MIR196A1	FOXF1
PTENP1-AS	Mir199a-2	FOXM1
PWRN1	MIR19A	FOXO1
TCL6	MIR19B1	FOXO3
GAPLINC	Mir1a-1	FSD1
TUSC7	MIR200A	FUS
FTX	MIR200B	FZD5
UICLM	MIR200C	GADD45A
LINC01518	MIR202	GDE1
LINC00858	MIR203A	GEMIN2
lnc-FTX	MIR204	GGT1
TRPM2-AS	MIR205	GLI2
LINC00261	MIR206	GPC3
MAGI2-AS3	MIR20A	GPC6
KTN1-AS1	Mir20b	GPHA2
LINC00184	MIR21	GSK3B
OIP5‑AS1	MIR211	GSTM3
RHPN1-AS1	MIR212	H19
MYOSLID	MIR214	HAS2
MAGI1-IT1	MIR215	HDAC4
LINC00174	MIR216A	HERC1
RP11‑543N12.1	MIR216B	HES1
TPT1-AS1	MIR217	HIF1A
DDX11-AS1	MIR218-1	HIV-1
EWSAT1	Mir21a	HMGA2
PCAT6	MIR22	HMGB1
LINC00210	MIR221	HMMR
SNHG8	MIR222	HNF4G
SNHG20	MIR223	HOXA@
EGOT	MIR23A	HOXA1
LINC01003	MIR23B	HOXA10
LINC00641	MIR23C	HOXA11
LINC01354	MIR24-1	HOXA13
RUSC1-AS1	MIR25	HOXA4
TP73‑AS1	MIR26B	HOXA5
SBF2-AS1	MIR27A	HOXA7
RPL34‐AS1	MIR27B	HOXA9
MSC‑AS1	MIR28	HSPA5
SNHG4	MIR2861	HuR
DLEU1	MIR296	IDH1
TMPO-AS1	MIR299	IGF1R
PCED1B-AS1	MIR29A	IL10
GACAT1	MIR29B1	ITGB1
LINC00899	MIR29C	IWS1
MHENCR	MIR301A	Kcnq1
PSMA3-AS1	Mir302a	KDM1A
TTN‐AS1	MIR302D	KDR
SFTA1P	MIR30A	KIT
TRPC7-AS1	MIR30B	KLF2
PGM5-AS1	MIR30D	KLF4
lnc-PICSAR	MIR30E	KMT2A
LEF1-AS1	MIR3129	KRT1
MIR503HG	MIR3141	KRT7
LBX2-AS1	MIR3182	KU80
FGD5-AS1	MIR32	LAMA3
NR2F1-AS1	MIR320A	LAMB3
WT1-AS	MIR320B-1	LAMC2
SNHG20.	MIR320B1	LATS2
MIR4435‑2HG	MIR324	LAYN
HOXA11‐AS	MIR326	LC3-II
LINC01419	MIR328	LILRB2
TP53TG1	MIR331	LMBR1L
LOXL1-AS1	MIR335	LMTK3
LEF1‐AS1	MIR337	LMX1A
MIR100HG	MIR338	LPAR1
PTCSC3	MIR339	LRP6
LINC01094	MIR33A	LTBP1
LINC00485	MIR33B	LTBP3
SOX2-OT	MIR340	LTBR
RASSF8‑AS1	MIR342	LY6K
BCAR4	MIR345	Mafa
MACC1‑AS1	MIR346	MAP2K1
LINC01561	MIR34A	MAP2K2
HOXB‑AS3	Mir34c	MAPK1
DNAH17-AS1	MIR361	MAPK10
TDRG1	MIR3619	MAPK3
NUTM2A-AS1	MIR362	MAPK6
LSINCT5	MIR363	MAPK8
MIR600HG	MIR365A	MAPK9
GAS8-AS1	MIR3663	MCAM
MINCR	MIR3666	MCL1
BACE1-AS	MIR367	MDM2
MNX1-AS1	MIR369	MIA2
PANDAR	MIR370	MKNK2
BISPR	MIR372	MMP1
SAMMSON	MIR373	Mmp13
ILF3-AS1	MIR374B	MMP14
DBH-AS1	MIR375	MMP2
LINC00707	MIR376A1	MMP3
CLMAT3	MIR377	MMP7
CCND2-AS1	MIR378A	MMP9
HOXA-AS2	MIR378B	MORC2
SOX21-AS1	Mir381	MTOR
IRAIN	MIR382	MYBL2
GSEC	MIR384	MYC
LINC01503	MIR3960	NANOG
LINC00265	MIR410	NCL
EMX2OS	MIR411	NDUFC2
HAS2-AS1	MIR421	NEAT1
LINC00320	MIR422A	NES
ZFHX4-AS1	Mir423	NF195
CASC8	MIR424	NFE2L2
FOXCUT	MIR425	NFKB1
LINC01081	MIR4262	NFYA
LINC01980	MIR4270	NKD2
GPC3-AS1	MIR429	NNMT
SMILR	MIR4290	NNT
KRT7-AS	MIR4294	NOP53
LINP1	MIR431	Notch1
LINC00305	MIR4310	NOTCH2
MIR2052HG	MIR4319	NOTCH3
lncRNA-GHET1	MIR432	NPTN-IT1
RBM5-AS1	MIR433	NUPR1
RAMP2-AS1	MIR4429	OCLN
LINC00668	MIR448	osteocalcin
XIAP-AS1	MIR4486	P21
LUADT1	MIR449B	p38
SOCS2-AS1	Mir449c	PABPC1
LINC01305	MIR4513	PARP1
PRAL	MIR4516	PcG
lncRNARP1‑85F18.6(ENST00000415054)	MIR4518	PCNA
DLGAP1-AS2	MIR451A	PDCD4
	MIR454	PDGFB
	Mir455	PDK1
	MIR4656	PDPK1
	MIR4677	Pdx1
	MIR4766	Pidd1
	MIR4769	PIK3CB
	MIR484	Pink1
	MIR485	PKM
	MIR486-1	PLEKHO1
	MIR488	PPEF1
	MIR489	PRC2
	MIR490	PRKAA1
	MIR491	PRKAR2A
	MIR493	PRKCE
	MIR494	PSPC1
	MIR495	PTBP3
	MIR496	PTCH1
	MIR497	PTEN
	MIR498	PTGS2
	MIR500A	PTK2
	MIR503	PTPN6
	miR504	PXN
	MIR506	QKI
	MIR510	RAC2
	MIR516A1	RAF1
	MIR518B	RAP1B
	MIR519B	RASSF6
	MIR519D	RB1
	MIR524	RBM38
	MIR525	ROBO1
	MIR526B	RPRD1A
	Mir532	RUNX1
	MIR539	RUNX2
	MIR542	RUNX3
	MIR543	SDC4
	MIR544A	SERPINE1
	MIR558	SETD2
	MIR5590	SFRP1
	MIR574	SGK1
	MIR577	SH3D19
	MIR581	SIRT1
	MIR582	SMAD2
	MIR590	SMAD3
	MIR596	SMAD4
	MIR599	SNAI1
	MIR612	SNAI2
	MIR613	SNAPC2
	MIR616	SNCA
	MIR625	SOX2
	MIR627	SOX4
	MIR637	SP1
	MIR642A	SP7
	MIR654	SRp40
	MIR656	ST6GAL2
	MIR664A	STAT3
	MIR664B	STAU1
	MIR665	STC1
	MIR671	SUFU
	MIR6867	SUZ12
	MIR708	TBCB
	MIR760	TFF3
	MIR765	TGFB1
	MIR766	TIMP3
	MIR769	TJP1
	MIR770	TM9SF3
	MIR873	TNFRSF10B
	MIR874	TNFSF10
	MIR875	TNXB
	MIR876	TP53
	MIR877	TP63
	MIR892B	TRIB2
	Mir9-2	TRPM2
	MIR93	TSHR
	MIR939	TWIST1
	MIR942	TYMS
	MIR96	UBE2B
	MIR98	UBE2I
	MIRLET7C	VEGFA
	MIRLET7G	VIM
	MIRLET7I	VPS4A
	miRNA-9	WASL
		WDR5
		WIF1
		WNT5A
		WNT6
		YAP1
		YBX1
		ZEB1
		ZEB2
		ZNF174
