# Supplementary material for: Comprehensive Analysis of Serum Small Extracellular Vesicles-Derived Coding and Non-Coding RNAs from Retinoblastoma Patients for Identifying Regulatory Interactions
Source: Cancers (Basel). 2022 Aug 29;14(17):4179. doi: 10.3390/cancers14174179 (PMC9454787; doi:10.3390/cancers14174179)
Supplement: Supplementary file 1 [file cancers-14-04179-s001.zip › File S3 RB exosomal lncRNA-miRNA-mRNA network.xls]

## Sheet: RNA list
miRNAs		lncRNAs		mRNAs
MIR140		MALAT1		CDKN1A
MIR145		HOTAIR		ZEB1
miR-129-5p		AFAP1-AS1		CDH1
MIR148A		NEAT1		BCL2
MIR125B		MEG3		EZH2
MIR144		SNHG1		TP53
miR-101		KCNQ1OT1		MYC
MIR31HG		SNHG16		CASP3
MIR143		DBH-AS1		MMP9
miR-101-3p		CASC2		CCND1
MIR129-1		HCP5		AKT1
MIR149		SNHG12		VEGFA
Mir129		BANCR		CDKN1C
MIR142		GHET1		PTEN
miR-124		BDNF-AS		CASP9
MIR126		HOTTIP		MMP2
MIR1271		FEZF1-AS1		CDKN1B
MIR150		HOXA-AS2		HIF1A
miR-7-5p		RBM5-AS1		CCNE1
MIR154		lncRNA-GHET1		MMP14
miR-16-5p		LINC01116		CDH5
MIR107		SOX21-AS1		BAX
miR-135a-5p		ZFAS1		RUNX3
MIR10A				ZEB2
MIR146A				RB1
miRâ€‘16				ERBB2
miR-376a				SOX2
miR-181b				SNAI2
miR-153-3p				SNAI1
miR-15b				SMAD2
Mir148a				NES
MIR1277				NANOG
miR-195a				KRT1
MIR146B				PARP1
miRâ€133a				VIM
MIR128				TWIST1
MIR132				MDM2
miR-194				CASP8
Mir122				MMP13
miR-181d-5p				ERK1
miR-424-5p				CDKN2A
miR-218				CDK6
MIR127				SFTA1P
MIR141				RUNX1
MIR101				SOX4
Mir141				P21
miRâ€124â€3p
miR-181a-5p
Mir144
miR-30
miR-30b
MIR124-1
miR-124-3p
miR-9
Mir138-2
miR-519a-3p
Mir125
MIR148B
miR-19
MIR128-1
MIR139
Mir105
Mir130b
miR-512-3p

## Sheet: Node data
AverageShortestPathLength	BetweennessCentrality	ClosenessCentrality	ClusteringCoefficient	Degree	degree.layout	Eccentricity	IsSingleNode	name	NeighborhoodConnectivity	NumberOfDirectedEdges	NumberOfUndirectedEdges	PartnerOfMultiEdgedNodePairs	Radiality	selected	SelfLoops	shared name	Stress	TopologicalCoefficient
2.22794	0.491639	0.448845	0	43	42	4	FALSE	MALAT1	2.7907	0	43	0	0.971443	FALSE	0	MALAT1	77114	0.0813953
2.66912	0.221554	0.374656	0	25	25	6	FALSE	HOTAIR	3	0	25	0	0.961183	FALSE	0	HOTAIR	37344	0.111111
2.77206	0.195875	0.360743	0	24	23	6	FALSE	AFAP1-AS1	2.45833	0	24	0	0.958789	FALSE	0	AFAP1-AS1	30840	0.104167
2.86029	0.192545	0.349614	0	24	24	6	FALSE	NEAT1	2.25	0	24	0	0.956737	FALSE	0	NEAT1	34984	0.113636
2.82353	0.123568	0.354167	0	6	6	5	FALSE	MIR140	13.8333	0	6	0	0.957592	FALSE	0	MIR140	16406	0.206989
2.875	0.111182	0.347826	0	15	15	5	FALSE	MEG3	3.26667	0	15	0	0.956395	FALSE	0	MEG3	19698	0.161905
2.52941	0.088337	0.395349	0	6	6	5	FALSE	MIR145	20.8333	0	6	0	0.964432	FALSE	0	MIR145	12742	0.238956
2.90441	0.0852511	0.344304	0	13	13	5	FALSE	SNHG1	3.30769	0	13	0	0.955711	FALSE	0	SNHG1	13154	0.164835
2.73529	0.0782598	0.365591	0	8	8	5	FALSE	CDKN1A	12.75	0	8	0	0.959644	FALSE	0	CDKN1A	14404	0.17803
2.51471	0.0662495	0.397661	0	5	5	5	FALSE	ZEB1	24.6	0	5	0	0.964774	FALSE	0	ZEB1	11556	0.280952
2.82353	0.0588585	0.354167	0	6	6	5	FALSE	CDH1	14.3333	0	6	0	0.957592	FALSE	0	CDH1	9080	0.215054
2.97059	0.0490887	0.336634	0	3	3	5	FALSE	miR-129	23.3333	0	3	0	0.954172	FALSE	0	miR-129-5p	6406	0.391813
3.15441	0.0486065	0.317016	0	6	6	5	FALSE	KCNQ1OT1	2.83333	0	6	0	0.949897	FALSE	0	KCNQ1OT1	3620	0.229167
3.02941	0.0469795	0.330097	0	6	6	6	FALSE	BCL2	12.3333	0	6	0	0.952804	FALSE	0	BCL2	7960	0.213836
3.77206	0.0436819	0.265107	0	3	3	6	FALSE	SNHG16	3	0	3	0	0.935534	FALSE	0	SNHG16	5620	0.333333
2.64706	0.0412264	0.377778	0	5	5	5	FALSE	EZH2	21.8	0	5	0	0.961696	FALSE	0	EZH2	9034	0.277333
2.76471	0.0376234	0.361702	0	5	5	5	FALSE	TP53	19.4	0	5	0	0.95896	FALSE	0	TP53	6930	0.274627
3.25735	0.0355907	0.306998	0	7	7	6	FALSE	ZFAS1	2.71429	0	7	0	0.947503	FALSE	0	ZFAS1	4484	0.214286
2.95588	0.0352408	0.338308	0	4	4	5	FALSE	MYC	17.25	0	4	0	0.954514	FALSE	0	MYC	4540	0.290179
2.66176	0.033072	0.375691	0	4	4	5	FALSE	MIR148A	26.75	0	4	0	0.961354	FALSE	0	MIR148A	7788	0.343333
3.47794	0.0325553	0.287526	0	6	6	6	FALSE	DBH-AS1	2.83333	0	6	0	0.942373	FALSE	0	DBH-AS1	6306	0.229167
3.50735	0.0310406	0.285115	0	5	5	6	FALSE	CASC2	2.8	0	5	0	0.941689	FALSE	0	CASC2	3676	0.257143
3.78676	0.0293028	0.264078	0	3	3	6	FALSE	HCP5	2.66667	0	3	0	0.935192	FALSE	0	HCP5	3750	0.333333
3.93382	0.0293028	0.254206	0	3	3	6	FALSE	SNHG12	1.66667	0	3	0	0.931772	FALSE	0	SNHG12	3050	0.333333
3.19118	0.0291939	0.313364	0	2	2	5	FALSE	MIR125B	22.5	0	2	0	0.949042	FALSE	0	MIR125B	3008	0.5
2.67647	0.0265436	0.373626	0	4	4	5	FALSE	CASP3	26.75	0	4	0	0.961012	FALSE	0	CASP3	6740	0.347973
2.75	0.0232479	0.363636	0	4	4	5	FALSE	MMP9	24.5	0	4	0	0.959302	FALSE	0	MMP9	6210	0.34058
3.10294	0.0225309	0.322275	0	3	3	5	FALSE	MIR144	17	0	3	0	0.951094	FALSE	0	MIR144	2870	0.340426
3.36029	0.0207213	0.297593	0	6	6	6	FALSE	BANCR	4	0	6	0	0.945109	FALSE	0	BANCR	4944	0.272727
2.92647	0.019697	0.341709	0	3	3	5	FALSE	CCND1	24.3333	0	3	0	0.955198	FALSE	0	CCND1	4166	0.39548
2.88235	0.0186547	0.346939	0	4	4	5	FALSE	miR-101	21	0	4	0	0.956224	FALSE	0	miR-101	4334	0.327869
2.77941	0.0157324	0.359788	0	3	3	5	FALSE	AKT1	30.6667	0	3	0	0.958618	FALSE	0	AKT1	4104	0.436275
3.69853	0.0156199	0.270378	0	3	3	6	FALSE	MIR31HG	3.66667	0	3	0	0.937244	FALSE	0	MIR31HG	2304	0.380952
3.64706	0.0147059	0.274194	0	2	2	7	FALSE	VEGFA	13	0	2	0	0.93844	FALSE	0	VEGFA	1914	0.5
3.80147	0.0147059	0.263056	0	2	2	6	FALSE	GHET1	3.5	0	2	0	0.93485	FALSE	0	GHET1	1558	0.5
4.75	0.0147059	0.210526	0	2	2	7	FALSE	CDKN1C	2	0	2	0	0.912791	FALSE	0	CDKN1C	1876	0.5
4.16912	0.0147059	0.239859	0	2	2	6	FALSE	BDNF-AS	1.5	0	2	0	0.9263	FALSE	0	BDNF-AS	1506	0.5
3.29412	0.0139236	0.303571	0	3	3	7	FALSE	PTEN	18	0	3	0	0.946648	FALSE	0	PTEN	2170	0.377778
2.88235	0.0136712	0.346939	0	3	3	5	FALSE	CASP9	27.3333	0	3	0	0.956224	FALSE	0	CASP9	3406	0.424731
2.94118	0.0120328	0.34	0	3	3	5	FALSE	MMP2	24.3333	0	3	0	0.954856	FALSE	0	MMP2	3262	0.402299
2.86765	0.0118414	0.348718	0	3	3	5	FALSE	MIR143	27.6667	0	3	0	0.956566	FALSE	0	MIR143	3332	0.430108
2.94118	0.0115458	0.34	0	3	3	5	FALSE	miR-101-3p	26.6667	0	3	0	0.954856	FALSE	0	miR-101-3p	3296	0.435028
2.94118	0.0115458	0.34	0	3	3	5	FALSE	MIR129-1	26.6667	0	3	0	0.954856	FALSE	0	MIR129-1	3296	0.435028
3.47059	0.00958911	0.288136	0	2	2	6	FALSE	MIR149	15.5	0	2	0	0.942544	FALSE	0	MIR149	770	0.5
3.15441	0.00765845	0.317016	0	4	4	6	FALSE	HOTTIP	5	0	4	0	0.949897	FALSE	0	HOTTIP	1818	0.333333
3.16176	0.00735862	0.316279	0	2	2	5	FALSE	CDKN1B	24.5	0	2	0	0.949726	FALSE	0	CDKN1B	1818	0.522222
3.01471	0.00562468	0.331707	0	2	2	5	FALSE	Mir129	33.5	0	2	0	0.953146	FALSE	0	Mir129	1840	0.590909
3.01471	0.00562468	0.331707	0	2	2	5	FALSE	MIR142	33.5	0	2	0	0.953146	FALSE	0	MIR142	1840	0.590909
3.01471	0.00562468	0.331707	0	2	2	5	FALSE	miR-124	33.5	0	2	0	0.953146	FALSE	0	miR-124	1840	0.590909
2.97059	0.0051066	0.336634	0	2	2	5	FALSE	MIR126	34	0	2	0	0.954172	FALSE	0	MIR126	1484	0.589286
3.16176	0.00482896	0.316279	0	2	2	5	FALSE	MIR1271	25	0	2	0	0.949726	FALSE	0	MIR1271	826	0.533333
3.16176	0.00482896	0.316279	0	2	2	5	FALSE	MIR150	25	0	2	0	0.949726	FALSE	0	MIR150	826	0.533333
3.63235	0.00424865	0.275304	0	2	2	7	FALSE	HIF1A	14	0	2	0	0.938782	FALSE	0	HIF1A	808	0.52
3.58824	0.00423811	0.278689	0	2	2	7	FALSE	CCNE1	15.5	0	2	0	0.939808	FALSE	0	CCNE1	838	0.517857
3.69118	0.00378749	0.270916	0	2	2	6	FALSE	miR-7	11	0	2	0	0.937415	FALSE	0	miR-7-5p	428	0.5
3.55147	0.0036961	0.281573	0	3	3	6	FALSE	FEZF1-AS1	3.66667	0	3	0	0.940663	FALSE	0	FEZF1-AS1	666	0.380952
3.13235	0.00297437	0.319249	0	2	2	5	FALSE	MIR154	28	0	2	0	0.95041	FALSE	0	MIR154	696	0.574468
3.5	0.00294674	0.285714	0	2	2	6	FALSE	miR-16-5p	18.5	0	2	0	0.94186	FALSE	0	miR-16-5p	760	0.564516
3.70588	0.0028308	0.269841	0	2	2	7	FALSE	MIR107	13.5	0	2	0	0.937073	FALSE	0	MIR107	436	0.5
3.61765	0.00142067	0.276423	0	2	2	7	FALSE	MMP1	15.5	0	2	0	0.939124	FALSE	0	MMP1	454	0.557692
3.67647	0.00124916	0.272	0	2	2	7	FALSE	BAX	14	0	2	0	0.937756	FALSE	0	BAX	186	0.52
3.41912	0.000690526	0.292473	0	2	2	6	FALSE	HOXA-AS2	6.5	0	2	0	0.943741	FALSE	0	HOXA-AS2	342	0.611111
3.22059	0	0.310502	0	1	1	5	FALSE	MIR141	43	0	1	0	0.948358	FALSE	0	MIR141	0	0
3.22059	0	0.310502	0	1	1	5	FALSE	MIR101	43	0	1	0	0.948358	FALSE	0	MIR101	0	0
3.22059	0	0.310502	0	1	1	5	FALSE	Mir141	43	0	1	0	0.948358	FALSE	0	Mir141	0	0
3.22059	0	0.310502	0	1	1	5	FALSE	miRâ€124	43	0	1	0	0.948358	FALSE	0	miRâ€124â€3p	0	0
3.22059	0	0.310502	0	1	1	5	FALSE	miR-181a	43	0	1	0	0.948358	FALSE	0	miR-181a-5p	0	0
3.22059	0	0.310502	0	1	1	5	FALSE	Mir144	43	0	1	0	0.948358	FALSE	0	Mir144	0	0
3.22059	0	0.310502	0	1	1	5	FALSE	miR-30	43	0	1	0	0.948358	FALSE	0	miR-30	0	0
3.22059	0	0.310502	0	1	1	5	FALSE	miR-30b	43	0	1	0	0.948358	FALSE	0	miR-30b	0	0
3.22059	0	0.310502	0	1	1	5	FALSE	MMP14	43	0	1	0	0.948358	FALSE	0	MMP14	0	0
3.22059	0	0.310502	0	1	1	5	FALSE	CDH5	43	0	1	0	0.948358	FALSE	0	CDH5	0	0
3.22059	0	0.310502	0	1	1	5	FALSE	MIR124-1	43	0	1	0	0.948358	FALSE	0	MIR124-1	0	0
3.22059	0	0.310502	0	1	1	5	FALSE	ZEB2	43	0	1	0	0.948358	FALSE	0	ZEB2	0	0
3.66176	0	0.273092	0	1	1	7	FALSE	miR-519a	25	0	1	0	0.938098	FALSE	0	miR-519a-3p	0	0
3.66176	0	0.273092	0	1	1	7	FALSE	Mir125	25	0	1	0	0.938098	FALSE	0	Mir125	0	0
3.66176	0	0.273092	0	1	1	7	FALSE	RUNX3	25	0	1	0	0.938098	FALSE	0	RUNX3	0	0
3.66176	0	0.273092	0	1	1	7	FALSE	MIR148B	25	0	1	0	0.938098	FALSE	0	MIR148B	0	0
3.66176	0	0.273092	0	1	1	7	FALSE	miR-19	25	0	1	0	0.938098	FALSE	0	miR-19	0	0
3.66176	0	0.273092	0	1	1	7	FALSE	RB1	25	0	1	0	0.938098	FALSE	0	RB1	0	0
3.66176	0	0.273092	0	1	1	7	FALSE	ERBB2	25	0	1	0	0.938098	FALSE	0	ERBB2	0	0
3.76471	0	0.265625	0	1	1	7	FALSE	miR-512	24	0	1	0	0.935705	FALSE	0	miR-512-3p	0	0
3.76471	0	0.265625	0	1	1	7	FALSE	SOX2	24	0	1	0	0.935705	FALSE	0	SOX2	0	0
3.76471	0	0.265625	0	1	1	7	FALSE	SNAI2	24	0	1	0	0.935705	FALSE	0	SNAI2	0	0
3.76471	0	0.265625	0	1	1	7	FALSE	SNAI1	24	0	1	0	0.935705	FALSE	0	SNAI1	0	0
3.76471	0	0.265625	0	1	1	7	FALSE	SMAD2	24	0	1	0	0.935705	FALSE	0	SMAD2	0	0
3.76471	0	0.265625	0	1	1	7	FALSE	NES	24	0	1	0	0.935705	FALSE	0	NES	0	0
3.76471	0	0.265625	0	1	1	7	FALSE	NANOG	24	0	1	0	0.935705	FALSE	0	NANOG	0	0
3.76471	0	0.265625	0	1	1	7	FALSE	KRT1	24	0	1	0	0.935705	FALSE	0	KRT1	0	0
3.76471	0	0.265625	0	1	1	7	FALSE	PARP1	24	0	1	0	0.935705	FALSE	0	PARP1	0	0
3.76471	0	0.265625	0	1	1	7	FALSE	VIM	24	0	1	0	0.935705	FALSE	0	VIM	0	0
3.76471	0	0.265625	0	1	1	7	FALSE	TWIST1	24	0	1	0	0.935705	FALSE	0	TWIST1	0	0
3.85294	0	0.259542	0	1	1	7	FALSE	Mir148a	24	0	1	0	0.933653	FALSE	0	Mir148a	0	0
3.85294	0	0.259542	0	1	1	7	FALSE	MIR1277	24	0	1	0	0.933653	FALSE	0	MIR1277	0	0
3.85294	0	0.259542	0	1	1	7	FALSE	miR-195a	24	0	1	0	0.933653	FALSE	0	miR-195a	0	0
3.85294	0	0.259542	0	1	1	7	FALSE	MIR146B	24	0	1	0	0.933653	FALSE	0	MIR146B	0	0
3.85294	0	0.259542	0	1	1	7	FALSE	miRâ€133a	24	0	1	0	0.933653	FALSE	0	miRâ€133a	0	0
3.85294	0	0.259542	0	1	1	7	FALSE	MIR128	24	0	1	0	0.933653	FALSE	0	MIR128	0	0
3.85294	0	0.259542	0	1	1	7	FALSE	MIR132	24	0	1	0	0.933653	FALSE	0	MIR132	0	0
3.85294	0	0.259542	0	1	1	7	FALSE	Mmp13	24	0	1	0	0.933653	FALSE	0	Mmp13	0	0
3.85294	0	0.259542	0	1	1	7	FALSE	miR-194	24	0	1	0	0.933653	FALSE	0	miR-194	0	0
3.85294	0	0.259542	0	1	1	7	FALSE	Mir122	24	0	1	0	0.933653	FALSE	0	Mir122	0	0
3.85294	0	0.259542	0	1	1	7	FALSE	miR-181d	24	0	1	0	0.933653	FALSE	0	miR-181d-5p	0	0
3.86765	0	0.258555	0	1	1	6	FALSE	miR-424	15	0	1	0	0.933311	FALSE	0	miR-424-5p	0	0
3.86765	0	0.258555	0	1	1	6	FALSE	miR-218	15	0	1	0	0.933311	FALSE	0	miR-218	0	0
3.86765	0	0.258555	0	1	1	6	FALSE	MIR127	15	0	1	0	0.933311	FALSE	0	MIR127	0	0
3.86765	0	0.258555	0	1	1	6	FALSE	MDM2	15	0	1	0	0.933311	FALSE	0	MDM2	0	0
3.86765	0	0.258555	0	1	1	6	FALSE	CASP8	15	0	1	0	0.933311	FALSE	0	CASP8	0	0
3.89706	0	0.256604	0	1	1	6	FALSE	miR-376a	13	0	1	0	0.932627	FALSE	0	miR-376a	0	0
3.89706	0	0.256604	0	1	1	6	FALSE	miR-181b	13	0	1	0	0.932627	FALSE	0	miR-181b	0	0
3.89706	0	0.256604	0	1	1	6	FALSE	miR-153	13	0	1	0	0.932627	FALSE	0	miR-153-3p	0	0
3.89706	0	0.256604	0	1	1	6	FALSE	miR-15b	13	0	1	0	0.932627	FALSE	0	miR-15b	0	0
4.25	0	0.235294	0	1	1	7	FALSE	miR-135a	7	0	1	0	0.924419	FALSE	0	miR-135a-5p	0	0
4.25	0	0.235294	0	1	1	7	FALSE	MIR10A	7	0	1	0	0.924419	FALSE	0	MIR10A	0	0
4.02206	0	0.248629	0	1	1	7	FALSE	CCDC26	6	0	1	0	0.92972	FALSE	0	CCDC26	0	0
4.14706	0	0.241135	0	1	1	6	FALSE	miR-124	6	0	1	0	0.926813	FALSE	0	miR-124-3p	0	0
4.14706	0	0.241135	0	1	1	6	FALSE	miR-9	6	0	1	0	0.926813	FALSE	0	miR-9	0	0
4.14706	0	0.241135	0	1	1	6	FALSE	Mir138-2	6	0	1	0	0.926813	FALSE	0	Mir138-2	0	0
4.35294	0	0.22973	0	1	1	7	FALSE	ERK1	6	0	1	0	0.922025	FALSE	0	ERK1	0	0
4.47059	0	0.223684	0	1	1	7	FALSE	CDKN2A	6	0	1	0	0.919289	FALSE	0	CDKN2A	0	0
4.47059	0	0.223684	0	1	1	7	FALSE	CDK6	6	0	1	0	0.919289	FALSE	0	CDK6	0	0
3.75735	0	0.266145	0	1	1	6	FALSE	SFTA1P	5	0	1	0	0.935876	FALSE	0	SFTA1P	0	0
4.5	0	0.222222	0	1	1	7	FALSE	RUNX1	5	0	1	0	0.918605	FALSE	0	RUNX1	0	0
4.5	0	0.222222	0	1	1	7	FALSE	SOX4	5	0	1	0	0.918605	FALSE	0	SOX4	0	0
3.94853	0	0.253259	0	1	1	6	FALSE	RBM5-AS1	4	0	1	0	0.93143	FALSE	0	RBM5-AS1	0	0
3.94853	0	0.253259	0	1	1	6	FALSE	lncRNA-GHET1	4	0	1	0	0.93143	FALSE	0	lncRNA-GHET1	0	0
4.69118	0	0.213166	0	1	1	7	FALSE	P21	3	0	1	0	0.914159	FALSE	0	P21	0	0
4.76471	0	0.209877	0	1	1	7	FALSE	MIR146A	3	0	1	0	0.912449	FALSE	0	MIR146A	0	0
4.77941	0	0.209231	0	1	1	7	FALSE	MIR128-1	3	0	1	0	0.912107	FALSE	0	MIR128-1	0	0
4.77941	0	0.209231	0	1	1	7	FALSE	MIR139	3	0	1	0	0.912107	FALSE	0	MIR139	0	0
4.92647	0	0.202985	0	1	1	7	FALSE	miRâ€‘16	3	0	1	0	0.908687	FALSE	0	miRâ€‘16	0	0
4.92647	0	0.202985	0	1	1	7	FALSE	MMP13	3	0	1	0	0.908687	FALSE	0	MMP13	0	0
4.63971	0	0.215531	0	1	1	8	FALSE	LINC01116	2	0	1	0	0.915356	FALSE	0	LINC01116	0	0
4.79412	0	0.208589	0	1	1	7	FALSE	Mir105	2	0	1	0	0.911765	FALSE	0	Mir105	0	0
5.16176	0	0.193732	0	1	1	7	FALSE	Mir130b	2	0	1	0	0.903215	FALSE	0	Mir130b	0	0
5.74265	0	0.174136	0	1	1	8	FALSE	SOX21-AS1	2	0	1	0	0.889706	FALSE	0	SOX21-AS1	0	0

## Sheet: Edge data
connection	EdgeBetweenness	interaction	logfc	name	selected	shared interaction	shared name	udn
lnc-mirna	114.059	interacts with	-2.48962	ZFAS1 (interacts with) MIR1271	FALSE	interacts with	ZFAS1 (interacts with) MIR1271	Down
lnc-mirna	272	interacts with	-2.48962	ZFAS1 (interacts with) miR-135a-5p	FALSE	interacts with	ZFAS1 (interacts with) miR-135a-5p	Down
lnc-mirna	114.059	interacts with	-2.48962	ZFAS1 (interacts with) MIR150	FALSE	interacts with	ZFAS1 (interacts with) MIR150	Down
lnc-mirna	140.456	interacts with	-2.48962	ZFAS1 (interacts with) miR-7-5p	FALSE	interacts with	ZFAS1 (interacts with) miR-7-5p	Down
lnc-mirna	272	interacts with	-2.48962	ZFAS1 (interacts with) MIR10A	FALSE	interacts with	ZFAS1 (interacts with) MIR10A	Down
lnc-protein	413.477	interacts with	-2.48962	ZFAS1 (interacts with) ZEB1	FALSE	interacts with	ZFAS1 (interacts with) ZEB1	Down
lnc-protein	252.839	interacts with	-2.48962	ZFAS1 (interacts with) CDH1	FALSE	interacts with	ZFAS1 (interacts with) CDH1	Down
lnc-protein	272	interacts with	1.37014	SOX21-AS1 (interacts with) CDKN1C	FALSE	interacts with	SOX21-AS1 (interacts with) CDKN1C	Up
lnc-mirna	272	interacts with	-2.29114	SNHG16 (interacts with) MIR146A	FALSE	interacts with	SNHG16 (interacts with) MIR146A	Down
lnc-mirna	1064	interacts with	-2.29114	SNHG16 (interacts with) MIR140	FALSE	interacts with	SNHG16 (interacts with) MIR140	Down
lnc-protein	540	interacts with	-2.29114	SNHG16 (interacts with) CDKN1C	FALSE	interacts with	SNHG16 (interacts with) CDKN1C	Down
lnc-mirna	804	interacts with	-6.23323	SNHG12 (interacts with) miR-129-5p	FALSE	interacts with	SNHG12 (interacts with) miR-129-5p	Down
lnc-mirna	272	interacts with	-6.23323	SNHG12 (interacts with) miRâ€‘16	FALSE	interacts with	SNHG12 (interacts with) miRâ€‘16	Down
lnc-protein	272	interacts with	-6.23323	SNHG12 (interacts with) MMP13	FALSE	interacts with	SNHG12 (interacts with) MMP13	Down
lnc-mirna	152.231	interacts with	-6.99085	SNHG1 (interacts with) MIR129-1	FALSE	interacts with	SNHG1 (interacts with) MIR129-1	Down
lnc-mirna	111.56	interacts with	-6.99085	SNHG1 (interacts with) MIR154	FALSE	interacts with	SNHG1 (interacts with) MIR154	Down
lnc-mirna	272	interacts with	-6.99085	SNHG1 (interacts with) miR-376a	FALSE	interacts with	SNHG1 (interacts with) miR-376a	Down
lnc-mirna	272	interacts with	-6.99085	SNHG1 (interacts with) miR-181b	FALSE	interacts with	SNHG1 (interacts with) miR-181b	Down
lnc-mirna	272	interacts with	-6.99085	SNHG1 (interacts with) miR-153-3p	FALSE	interacts with	SNHG1 (interacts with) miR-153-3p	Down
lnc-mirna	176.099	interacts with	-6.99085	SNHG1 (interacts with) miR-16-5p	FALSE	interacts with	SNHG1 (interacts with) miR-16-5p	Down
lnc-mirna	425.156	interacts with	-6.99085	SNHG1 (interacts with) MIR140	FALSE	interacts with	SNHG1 (interacts with) MIR140	Down
lnc-mirna	152.231	interacts with	-6.99085	SNHG1 (interacts with) miR-101-3p	FALSE	interacts with	SNHG1 (interacts with) miR-101-3p	Down
lnc-protein	451.062	interacts with	-6.99085	SNHG1 (interacts with) CDKN1A	FALSE	interacts with	SNHG1 (interacts with) CDKN1A	Down
lnc-mirna	401.987	interacts with	-6.99085	SNHG1 (interacts with) MIR145	FALSE	interacts with	SNHG1 (interacts with) MIR145	Down
lnc-protein	274.384	interacts with	-6.99085	SNHG1 (interacts with) TP53	FALSE	interacts with	SNHG1 (interacts with) TP53	Down
lnc-mirna	272	interacts with	-6.99085	SNHG1 (interacts with) miR-15b	FALSE	interacts with	SNHG1 (interacts with) miR-15b	Down
lnc-mirna	169.709	interacts with	-6.99085	SNHG1 (interacts with) miR-101	FALSE	interacts with	SNHG1 (interacts with) miR-101	Down
lnc-protein	272	interacts with	-4.48251	SFTA1P (interacts with) TP53	FALSE	interacts with	SFTA1P (interacts with) TP53	Down
lnc-protein	272	interacts with	-4.48251	RBM5-AS1 (interacts with) MYC	FALSE	interacts with	RBM5-AS1 (interacts with) MYC	Down
lnc-mirna	169.246	interacts with	-1.41991	NEAT1 (interacts with) miR-124	FALSE	interacts with	NEAT1 (interacts with) miR-124	Down
lnc-mirna	272	interacts with	-1.41991	NEAT1 (interacts with) Mir148a	FALSE	interacts with	NEAT1 (interacts with) Mir148a	Down
lnc-mirna	272	interacts with	-1.41991	NEAT1 (interacts with) MIR1277	FALSE	interacts with	NEAT1 (interacts with) MIR1277	Down
lnc-mirna	272	interacts with	-1.41991	NEAT1 (interacts with) miR-195a	FALSE	interacts with	NEAT1 (interacts with) miR-195a	Down
lnc-mirna	272	interacts with	-1.41991	NEAT1 (interacts with) MIR146B	FALSE	interacts with	NEAT1 (interacts with) MIR146B	Down
lnc-mirna	204.105	interacts with	-1.41991	NEAT1 (interacts with) miR-16-5p	FALSE	interacts with	NEAT1 (interacts with) miR-16-5p	Down
lnc-mirna	169.246	interacts with	-1.41991	NEAT1 (interacts with) MIR142	FALSE	interacts with	NEAT1 (interacts with) MIR142	Down
lnc-mirna	355.175	interacts with	-1.41991	NEAT1 (interacts with) miR-129-5p	FALSE	interacts with	NEAT1 (interacts with) miR-129-5p	Down
lnc-mirna	278.358	interacts with	-1.41991	NEAT1 (interacts with) MIR107	FALSE	interacts with	NEAT1 (interacts with) MIR107	Down
lnc-mirna	272	interacts with	-1.41991	NEAT1 (interacts with) miRâ€133a	FALSE	interacts with	NEAT1 (interacts with) miRâ€133a	Down
lnc-mirna	213.874	interacts with	-1.41991	NEAT1 (interacts with) miR-101-3p	FALSE	interacts with	NEAT1 (interacts with) miR-101-3p	Down
lnc-mirna	272	interacts with	-1.41991	NEAT1 (interacts with) MIR128	FALSE	interacts with	NEAT1 (interacts with) MIR128	Down
lnc-mirna	272	interacts with	-1.41991	NEAT1 (interacts with) MIR132	FALSE	interacts with	NEAT1 (interacts with) MIR132	Down
lnc-mirna	438.051	interacts with	-1.41991	NEAT1 (interacts with) MIR148A	FALSE	interacts with	NEAT1 (interacts with) MIR148A	Down
lnc-mirna	694.544	interacts with	-1.41991	NEAT1 (interacts with) MIR145	FALSE	interacts with	NEAT1 (interacts with) MIR145	Down
lnc-protein	272	interacts with	-1.41991	NEAT1 (interacts with) Mmp13	FALSE	interacts with	NEAT1 (interacts with) Mmp13	Down
lnc-protein	693.613	interacts with	-1.41991	NEAT1 (interacts with) ZEB1	FALSE	interacts with	NEAT1 (interacts with) ZEB1	Down
lnc-mirna	213.874	interacts with	-1.41991	NEAT1 (interacts with) MIR129-1	FALSE	interacts with	NEAT1 (interacts with) MIR129-1	Down
lnc-mirna	272	interacts with	-1.41991	NEAT1 (interacts with) miR-194	FALSE	interacts with	NEAT1 (interacts with) miR-194	Down
lnc-mirna	272	interacts with	-1.41991	NEAT1 (interacts with) Mir122	FALSE	interacts with	NEAT1 (interacts with) Mir122	Down
lnc-protein	479.846	interacts with	-1.41991	NEAT1 (interacts with) EZH2	FALSE	interacts with	NEAT1 (interacts with) EZH2	Down
lnc-mirna	272	interacts with	-1.41991	NEAT1 (interacts with) miR-181d-5p	FALSE	interacts with	NEAT1 (interacts with) miR-181d-5p	Down
lnc-mirna	271.084	interacts with	-1.41991	NEAT1 (interacts with) miR-101	FALSE	interacts with	NEAT1 (interacts with) miR-101	Down
lnc-mirna	169.246	interacts with	-1.41991	NEAT1 (interacts with) Mir129	FALSE	interacts with	NEAT1 (interacts with) Mir129	Down
lnc-protein	272	interacts with	-5.91609	MIR31HG (interacts with) P21	FALSE	interacts with	MIR31HG (interacts with) P21	Down
lnc-protein	98.7858	interacts with	-5.91609	MIR31HG (interacts with) HIF1A	FALSE	interacts with	MIR31HG (interacts with) HIF1A	Down
lnc-protein	474.775	interacts with	-5.91609	MIR31HG (interacts with) CDKN1A	FALSE	interacts with	MIR31HG (interacts with) CDKN1A	Down
lnc-mirna	171.784	interacts with	-6.9041	MEG3 (interacts with) MIR143	FALSE	interacts with	MEG3 (interacts with) MIR143	Down
lnc-mirna	272	interacts with	-6.9041	MEG3 (interacts with) miR-424-5p	FALSE	interacts with	MEG3 (interacts with) miR-424-5p	Down
lnc-mirna	272	interacts with	-6.9041	MEG3 (interacts with) miR-218	FALSE	interacts with	MEG3 (interacts with) miR-218	Down
lnc-mirna	270.621	interacts with	-6.9041	MEG3 (interacts with) miR-7-5p	FALSE	interacts with	MEG3 (interacts with) miR-7-5p	Down
lnc-mirna	264.492	interacts with	-6.9041	MEG3 (interacts with) MIR148A	FALSE	interacts with	MEG3 (interacts with) MIR148A	Down
lnc-mirna	366.124	interacts with	-6.9041	MEG3 (interacts with) MIR145	FALSE	interacts with	MEG3 (interacts with) MIR145	Down
lnc-protein	293.688	interacts with	-6.9041	MEG3 (interacts with) EZH2	FALSE	interacts with	MEG3 (interacts with) EZH2	Down
lnc-protein	244.043	interacts with	-6.9041	MEG3 (interacts with) TP53	FALSE	interacts with	MEG3 (interacts with) TP53	Down
lnc-mirna	272	interacts with	-6.9041	MEG3 (interacts with) MIR127	FALSE	interacts with	MEG3 (interacts with) MIR127	Down
lnc-mirna	545.119	interacts with	-6.9041	MEG3 (interacts with) MIR140	FALSE	interacts with	MEG3 (interacts with) MIR140	Down
lnc-protein	193.992	interacts with	-6.9041	MEG3 (interacts with) CASP9	FALSE	interacts with	MEG3 (interacts with) CASP9	Down
lnc-protein	406.574	interacts with	-6.9041	MEG3 (interacts with) BCL2	FALSE	interacts with	MEG3 (interacts with) BCL2	Down
lnc-protein	272	interacts with	-6.9041	MEG3 (interacts with) MDM2	FALSE	interacts with	MEG3 (interacts with) MDM2	Down
lnc-protein	272	interacts with	-6.9041	MEG3 (interacts with) CASP8	FALSE	interacts with	MEG3 (interacts with) CASP8	Down
lnc-protein	238.164	interacts with	-6.9041	MEG3 (interacts with) CASP3	FALSE	interacts with	MEG3 (interacts with) CASP3	Down
lnc-mirna	272	interacts with	-6.9041	MALAT1 (interacts with) MIR141	FALSE	interacts with	MALAT1 (interacts with) MIR141	Down
lnc-mirna	311.436	interacts with	-6.9041	MALAT1 (interacts with) MIR143	FALSE	interacts with	MALAT1 (interacts with) MIR143	Down
lnc-mirna	272	interacts with	-6.9041	MALAT1 (interacts with) MIR101	FALSE	interacts with	MALAT1 (interacts with) MIR101	Down
lnc-mirna	276.584	interacts with	-6.9041	MALAT1 (interacts with) MIR126	FALSE	interacts with	MALAT1 (interacts with) MIR126	Down
lnc-mirna	329.856	interacts with	-6.9041	MALAT1 (interacts with) miR-101-3p	FALSE	interacts with	MALAT1 (interacts with) miR-101-3p	Down
lnc-mirna	915.363	interacts with	-6.9041	MALAT1 (interacts with) miR-129-5p	FALSE	interacts with	MALAT1 (interacts with) miR-129-5p	Down
lnc-mirna	272	interacts with	-6.9041	MALAT1 (interacts with) Mir141	FALSE	interacts with	MALAT1 (interacts with) Mir141	Down
lnc-mirna	335.26	interacts with	-6.9041	MALAT1 (interacts with) MIR1271	FALSE	interacts with	MALAT1 (interacts with) MIR1271	Down
lnc-mirna	269.659	interacts with	-6.9041	MALAT1 (interacts with) MIR154	FALSE	interacts with	MALAT1 (interacts with) MIR154	Down
lnc-mirna	1577.86	interacts with	-6.9041	MALAT1 (interacts with) MIR140	FALSE	interacts with	MALAT1 (interacts with) MIR140	Down
lnc-mirna	618.099	interacts with	-6.9041	MALAT1 (interacts with) MIR145	FALSE	interacts with	MALAT1 (interacts with) MIR145	Down
lnc-mirna	272	interacts with	-6.9041	MALAT1 (interacts with) miR-181a-5p	FALSE	interacts with	MALAT1 (interacts with) miR-181a-5p	Down
lnc-mirna	272	interacts with	-6.9041	MALAT1 (interacts with) miRâ€124â€3p	FALSE	interacts with	MALAT1 (interacts with) miRâ€124â€3p	Down
lnc-mirna	804	interacts with	-6.9041	MALAT1 (interacts with) MIR125B	FALSE	interacts with	MALAT1 (interacts with) MIR125B	Down
lnc-mirna	335.26	interacts with	-6.9041	MALAT1 (interacts with) MIR150	FALSE	interacts with	MALAT1 (interacts with) MIR150	Down
lnc-mirna	272	interacts with	-6.9041	MALAT1 (interacts with) Mir144	FALSE	interacts with	MALAT1 (interacts with) Mir144	Down
lnc-mirna	272	interacts with	-6.9041	MALAT1 (interacts with) miR-30	FALSE	interacts with	MALAT1 (interacts with) miR-30	Down
lnc-mirna	309.293	interacts with	-6.9041	MALAT1 (interacts with) Mir129	FALSE	interacts with	MALAT1 (interacts with) Mir129	Down
lnc-mirna	309.293	interacts with	-6.9041	MALAT1 (interacts with) miR-124	FALSE	interacts with	MALAT1 (interacts with) miR-124	Down
lnc-mirna	381.311	interacts with	-6.9041	MALAT1 (interacts with) MIR148A	FALSE	interacts with	MALAT1 (interacts with) MIR148A	Down
lnc-mirna	309.293	interacts with	-6.9041	MALAT1 (interacts with) MIR142	FALSE	interacts with	MALAT1 (interacts with) MIR142	Down
lnc-mirna	362.842	interacts with	-6.9041	MALAT1 (interacts with) miR-101	FALSE	interacts with	MALAT1 (interacts with) miR-101	Down
lnc-mirna	622.565	interacts with	-6.9041	MALAT1 (interacts with) MIR144	FALSE	interacts with	MALAT1 (interacts with) MIR144	Down
lnc-mirna	272	interacts with	-6.9041	MALAT1 (interacts with) miR-30b	FALSE	interacts with	MALAT1 (interacts with) miR-30b	Down
lnc-protein	500.43	interacts with	-6.9041	MALAT1 (interacts with) ZEB1	FALSE	interacts with	MALAT1 (interacts with) ZEB1	Down
lnc-protein	430.156	interacts with	-6.9041	MALAT1 (interacts with) EZH2	FALSE	interacts with	MALAT1 (interacts with) EZH2	Down
lnc-mirna	329.856	interacts with	-6.9041	MALAT1 (interacts with) MIR129-1	FALSE	interacts with	MALAT1 (interacts with) MIR129-1	Down
lnc-protein	407.46	interacts with	-6.9041	MALAT1 (interacts with) MMP9	FALSE	interacts with	MALAT1 (interacts with) MMP9	Down
lnc-protein	350.811	interacts with	-6.9041	MALAT1 (interacts with) MMP2	FALSE	interacts with	MALAT1 (interacts with) MMP2	Down
lnc-protein	272	interacts with	-6.9041	MALAT1 (interacts with) MMP14	FALSE	interacts with	MALAT1 (interacts with) MMP14	Down
lnc-protein	272	interacts with	-6.9041	MALAT1 (interacts with) CDH5	FALSE	interacts with	MALAT1 (interacts with) CDH5	Down
lnc-mirna	272	interacts with	-6.9041	MALAT1 (interacts with) MIR124-1	FALSE	interacts with	MALAT1 (interacts with) MIR124-1	Down
lnc-protein	792.186	interacts with	-6.9041	MALAT1 (interacts with) CDH1	FALSE	interacts with	MALAT1 (interacts with) CDH1	Down
lnc-protein	335.029	interacts with	-6.9041	MALAT1 (interacts with) CASP9	FALSE	interacts with	MALAT1 (interacts with) CASP9	Down
lnc-protein	394.833	interacts with	-6.9041	MALAT1 (interacts with) CASP3	FALSE	interacts with	MALAT1 (interacts with) CASP3	Down
lnc-protein	695.765	interacts with	-6.9041	MALAT1 (interacts with) MYC	FALSE	interacts with	MALAT1 (interacts with) MYC	Down
lnc-protein	427.84	interacts with	-6.9041	MALAT1 (interacts with) CCND1	FALSE	interacts with	MALAT1 (interacts with) CCND1	Down
lnc-protein	471.952	interacts with	-6.9041	MALAT1 (interacts with) TP53	FALSE	interacts with	MALAT1 (interacts with) TP53	Down
lnc-protein	384.531	interacts with	-6.9041	MALAT1 (interacts with) CDKN1B	FALSE	interacts with	MALAT1 (interacts with) CDKN1B	Down
lnc-protein	814.389	interacts with	-6.9041	MALAT1 (interacts with) CDKN1A	FALSE	interacts with	MALAT1 (interacts with) CDKN1A	Down
lnc-protein	351.182	interacts with	-6.9041	MALAT1 (interacts with) AKT1	FALSE	interacts with	MALAT1 (interacts with) AKT1	Down
lnc-protein	272	interacts with	-6.9041	MALAT1 (interacts with) ZEB2	FALSE	interacts with	MALAT1 (interacts with) ZEB2	Down
lnc-protein	272	interacts with	-5.91609	lncRNA-GHET1 (interacts with) MYC	FALSE	interacts with	lncRNA-GHET1 (interacts with) MYC	Down
lnc-protein	272	interacts with	-5.91609	LINC01116 (interacts with) VEGFA	FALSE	interacts with	LINC01116 (interacts with) VEGFA	Down
lnc-mirna	613.929	interacts with	-1.43408	KCNQ1OT1 (interacts with) MIR145	FALSE	interacts with	KCNQ1OT1 (interacts with) MIR145	Down
lnc-mirna	233.638	interacts with	-1.43408	KCNQ1OT1 (interacts with) MIR149	FALSE	interacts with	KCNQ1OT1 (interacts with) MIR149	Down
lnc-mirna	393.264	interacts with	-1.43408	KCNQ1OT1 (interacts with) MIR140	FALSE	interacts with	KCNQ1OT1 (interacts with) MIR140	Down
lnc-mirna	272	interacts with	-1.43408	KCNQ1OT1 (interacts with) miR-124-3p	FALSE	interacts with	KCNQ1OT1 (interacts with) miR-124-3p	Down
lnc-mirna	272	interacts with	-1.43408	KCNQ1OT1 (interacts with) miR-9	FALSE	interacts with	KCNQ1OT1 (interacts with) miR-9	Down
lnc-mirna	272	interacts with	-1.43408	KCNQ1OT1 (interacts with) Mir138-2	FALSE	interacts with	KCNQ1OT1 (interacts with) Mir138-2	Down
lnc-protein	155.708	interacts with	7.29588	HOXA-AS2 (interacts with) EZH2	FALSE	interacts with	HOXA-AS2 (interacts with) EZH2	Up
lnc-protein	141.648	interacts with	7.29588	HOXA-AS2 (interacts with) CDKN1A	FALSE	interacts with	HOXA-AS2 (interacts with) CDKN1A	Up
lnc-mirna	153.364	interacts with	-6.23323	HOTTIP (interacts with) miR-101	FALSE	interacts with	HOTTIP (interacts with) miR-101	Down
lnc-protein	141.639	interacts with	-6.23323	HOTTIP (interacts with) BCL2	FALSE	interacts with	HOTTIP (interacts with) BCL2	Down
lnc-protein	89.0123	interacts with	-6.23323	HOTTIP (interacts with) BAX	FALSE	interacts with	HOTTIP (interacts with) BAX	Down
lnc-protein	169.203	interacts with	-6.23323	HOTTIP (interacts with) CDKN1A	FALSE	interacts with	HOTTIP (interacts with) CDKN1A	Down
lnc-mirna	390.474	interacts with	1.64346	HOTAIR (interacts with) MIR149	FALSE	interacts with	HOTAIR (interacts with) MIR149	Up
lnc-mirna	272	interacts with	1.64346	HOTAIR (interacts with) miR-519a-3p	FALSE	interacts with	HOTAIR (interacts with) miR-519a-3p	Up
lnc-mirna	182.93	interacts with	1.64346	HOTAIR (interacts with) MIR126	FALSE	interacts with	HOTAIR (interacts with) MIR126	Up
lnc-mirna	223.595	interacts with	1.64346	HOTAIR (interacts with) MIR143	FALSE	interacts with	HOTAIR (interacts with) MIR143	Up
lnc-mirna	272	interacts with	1.64346	HOTAIR (interacts with) Mir125	FALSE	interacts with	HOTAIR (interacts with) Mir125	Up
lnc-mirna	402.549	interacts with	1.64346	HOTAIR (interacts with) MIR148A	FALSE	interacts with	HOTAIR (interacts with) MIR148A	Up
lnc-protein	272	interacts with	1.64346	HOTAIR (interacts with) RUNX3	FALSE	interacts with	HOTAIR (interacts with) RUNX3	Up
lnc-protein	269.602	interacts with	1.64346	HOTAIR (interacts with) MMP9	FALSE	interacts with	HOTAIR (interacts with) MMP9	Up
lnc-protein	495.233	interacts with	1.64346	HOTAIR (interacts with) CDKN1A	FALSE	interacts with	HOTAIR (interacts with) CDKN1A	Up
lnc-protein	426.436	interacts with	1.64346	HOTAIR (interacts with) EZH2	FALSE	interacts with	HOTAIR (interacts with) EZH2	Up
lnc-mirna	272	interacts with	1.64346	HOTAIR (interacts with) MIR148B	FALSE	interacts with	HOTAIR (interacts with) MIR148B	Up
lnc-protein	391.151	interacts with	1.64346	HOTAIR (interacts with) TP53	FALSE	interacts with	HOTAIR (interacts with) TP53	Up
lnc-protein	249.29	interacts with	1.64346	HOTAIR (interacts with) AKT1	FALSE	interacts with	HOTAIR (interacts with) AKT1	Up
lnc-mirna	272	interacts with	1.64346	HOTAIR (interacts with) miR-19	FALSE	interacts with	HOTAIR (interacts with) miR-19	Up
lnc-protein	272	interacts with	1.64346	HOTAIR (interacts with) RB1	FALSE	interacts with	HOTAIR (interacts with) RB1	Up
lnc-protein	310.548	interacts with	1.64346	HOTAIR (interacts with) CCNE1	FALSE	interacts with	HOTAIR (interacts with) CCNE1	Up
lnc-protein	499.347	interacts with	1.64346	HOTAIR (interacts with) ZEB1	FALSE	interacts with	HOTAIR (interacts with) ZEB1	Up
lnc-protein	246.109	interacts with	1.64346	HOTAIR (interacts with) MMP1	FALSE	interacts with	HOTAIR (interacts with) MMP1	Up
lnc-protein	540	interacts with	1.64346	HOTAIR (interacts with) VEGFA	FALSE	interacts with	HOTAIR (interacts with) VEGFA	Up
lnc-protein	329.225	interacts with	1.64346	HOTAIR (interacts with) HIF1A	FALSE	interacts with	HOTAIR (interacts with) HIF1A	Up
lnc-protein	477.584	interacts with	1.64346	HOTAIR (interacts with) CDH1	FALSE	interacts with	HOTAIR (interacts with) CDH1	Up
lnc-protein	296.026	interacts with	1.64346	HOTAIR (interacts with) CASP3	FALSE	interacts with	HOTAIR (interacts with) CASP3	Up
lnc-protein	447.447	interacts with	1.64346	HOTAIR (interacts with) BCL2	FALSE	interacts with	HOTAIR (interacts with) BCL2	Up
lnc-protein	272	interacts with	1.64346	HOTAIR (interacts with) ERBB2	FALSE	interacts with	HOTAIR (interacts with) ERBB2	Up
lnc-protein	325.928	interacts with	1.64346	HOTAIR (interacts with) PTEN	FALSE	interacts with	HOTAIR (interacts with) PTEN	Up
lnc-mirna	272	interacts with	6.82992	HCP5 (interacts with) MIR128-1	FALSE	interacts with	HCP5 (interacts with) MIR128-1	Up
lnc-mirna	804	interacts with	6.82992	HCP5 (interacts with) MIR140	FALSE	interacts with	HCP5 (interacts with) MIR140	Up
lnc-mirna	272	interacts with	6.82992	HCP5 (interacts with) MIR139	FALSE	interacts with	HCP5 (interacts with) MIR139	Up
lnc-mirna	272	interacts with	-6.08336	GHET1 (interacts with) Mir105	FALSE	interacts with	GHET1 (interacts with) Mir105	Down
lnc-protein	540	interacts with	-6.08336	GHET1 (interacts with) CDH1	FALSE	interacts with	GHET1 (interacts with) CDH1	Down
lnc-mirna	115.449	interacts with	2.39523	FEZF1-AS1 (interacts with) MIR144	FALSE	interacts with	FEZF1-AS1 (interacts with) MIR144	Up
lnc-mirna	97.5887	interacts with	2.39523	FEZF1-AS1 (interacts with) MIR107	FALSE	interacts with	FEZF1-AS1 (interacts with) MIR107	Up
lnc-protein	194.683	interacts with	2.39523	FEZF1-AS1 (interacts with) CDH1	FALSE	interacts with	FEZF1-AS1 (interacts with) CDH1	Up
lnc-protein	157.678	interacts with	5.94767	DBH-AS1 (interacts with) CDKN1B	FALSE	interacts with	DBH-AS1 (interacts with) CDKN1B	Up
lnc-protein	272	interacts with	5.94767	DBH-AS1 (interacts with) CDKN2A	FALSE	interacts with	DBH-AS1 (interacts with) CDKN2A	Up
lnc-protein	378.535	interacts with	5.94767	DBH-AS1 (interacts with) CDKN1A	FALSE	interacts with	DBH-AS1 (interacts with) CDKN1A	Up
lnc-protein	272	interacts with	5.94767	DBH-AS1 (interacts with) CDK6	FALSE	interacts with	DBH-AS1 (interacts with) CDK6	Up
lnc-protein	117.075	interacts with	5.94767	DBH-AS1 (interacts with) CCNE1	FALSE	interacts with	DBH-AS1 (interacts with) CCNE1	Up
lnc-protein	270.144	interacts with	5.94767	DBH-AS1 (interacts with) CCND1	FALSE	interacts with	DBH-AS1 (interacts with) CCND1	Up
lnc-protein	272	interacts with	-6.71317	CCDC26 (interacts with) BCL2	FALSE	interacts with	CCDC26 (interacts with) BCL2	Down
lnc-protein	185.203	interacts with	-1.41991	CASC2 (interacts with) PTEN	FALSE	interacts with	CASC2 (interacts with) PTEN	Down
lnc-protein	321.285	interacts with	-1.41991	CASC2 (interacts with) BCL2	FALSE	interacts with	CASC2 (interacts with) BCL2	Down
lnc-mirna	361.322	interacts with	-1.41991	CASC2 (interacts with) MIR144	FALSE	interacts with	CASC2 (interacts with) MIR144	Down
lnc-protein	272	interacts with	-1.41991	CASC2 (interacts with) RUNX1	FALSE	interacts with	CASC2 (interacts with) RUNX1	Down
lnc-protein	272	interacts with	-1.41991	CASC2 (interacts with) SOX4	FALSE	interacts with	CASC2 (interacts with) SOX4	Down
lnc-mirna	540	interacts with	2.52017	BDNF-AS (interacts with) MIR125B	FALSE	interacts with	BDNF-AS (interacts with) MIR125B	Up
lnc-mirna	272	interacts with	2.52017	BDNF-AS (interacts with) Mir130b	FALSE	interacts with	BDNF-AS (interacts with) Mir130b	Up
lnc-protein	134.786	interacts with	4.05277	BANCR (interacts with) MMP2	FALSE	interacts with	BANCR (interacts with) MMP2	Up
lnc-protein	78.058	interacts with	4.05277	BANCR (interacts with) MMP1	FALSE	interacts with	BANCR (interacts with) MMP1	Up
lnc-protein	220.857	interacts with	4.05277	BANCR (interacts with) CDKN1A	FALSE	interacts with	BANCR (interacts with) CDKN1A	Up
lnc-protein	272	interacts with	4.05277	BANCR (interacts with) ERK1	FALSE	interacts with	BANCR (interacts with) ERK1	Up
lnc-protein	151.192	interacts with	4.05277	BANCR (interacts with) MMP9	FALSE	interacts with	BANCR (interacts with) MMP9	Up
lnc-protein	175.993	interacts with	4.05277	BANCR (interacts with) CDH1	FALSE	interacts with	BANCR (interacts with) CDH1	Up
lnc-mirna	272	interacts with	-7.22361	AFAP1-AS1 (interacts with) miR-512-3p	FALSE	interacts with	AFAP1-AS1 (interacts with) miR-512-3p	Down
lnc-mirna	821.052	interacts with	-7.22361	AFAP1-AS1 (interacts with) MIR145	FALSE	interacts with	AFAP1-AS1 (interacts with) MIR145	Down
lnc-protein	597.814	interacts with	-7.22361	AFAP1-AS1 (interacts with) ZEB1	FALSE	interacts with	AFAP1-AS1 (interacts with) ZEB1	Down
lnc-protein	272	interacts with	-7.22361	AFAP1-AS1 (interacts with) VIM	FALSE	interacts with	AFAP1-AS1 (interacts with) VIM	Down
lnc-protein	272	interacts with	-7.22361	AFAP1-AS1 (interacts with) SOX2	FALSE	interacts with	AFAP1-AS1 (interacts with) SOX2	Down
lnc-protein	272	interacts with	-7.22361	AFAP1-AS1 (interacts with) SNAI2	FALSE	interacts with	AFAP1-AS1 (interacts with) SNAI2	Down
lnc-protein	272	interacts with	-7.22361	AFAP1-AS1 (interacts with) SNAI1	FALSE	interacts with	AFAP1-AS1 (interacts with) SNAI1	Down
lnc-protein	272	interacts with	-7.22361	AFAP1-AS1 (interacts with) SMAD2	FALSE	interacts with	AFAP1-AS1 (interacts with) SMAD2	Down
lnc-protein	272	interacts with	-7.22361	AFAP1-AS1 (interacts with) NES	FALSE	interacts with	AFAP1-AS1 (interacts with) NES	Down
lnc-protein	272	interacts with	-7.22361	AFAP1-AS1 (interacts with) NANOG	FALSE	interacts with	AFAP1-AS1 (interacts with) NANOG	Down
lnc-protein	272	interacts with	-7.22361	AFAP1-AS1 (interacts with) KRT1	FALSE	interacts with	AFAP1-AS1 (interacts with) KRT1	Down
lnc-protein	326.278	interacts with	-7.22361	AFAP1-AS1 (interacts with) MYC	FALSE	interacts with	AFAP1-AS1 (interacts with) MYC	Down
lnc-protein	297.409	interacts with	-7.22361	AFAP1-AS1 (interacts with) MMP9	FALSE	interacts with	AFAP1-AS1 (interacts with) MMP9	Down
lnc-protein	228.246	interacts with	-7.22361	AFAP1-AS1 (interacts with) MMP2	FALSE	interacts with	AFAP1-AS1 (interacts with) MMP2	Down
lnc-protein	297.289	interacts with	-7.22361	AFAP1-AS1 (interacts with) CCND1	FALSE	interacts with	AFAP1-AS1 (interacts with) CCND1	Down
lnc-protein	272.143	interacts with	-7.22361	AFAP1-AS1 (interacts with) PTEN	FALSE	interacts with	AFAP1-AS1 (interacts with) PTEN	Down
lnc-protein	272	interacts with	-7.22361	AFAP1-AS1 (interacts with) PARP1	FALSE	interacts with	AFAP1-AS1 (interacts with) PARP1	Down
lnc-protein	244.988	interacts with	-7.22361	AFAP1-AS1 (interacts with) CASP9	FALSE	interacts with	AFAP1-AS1 (interacts with) CASP9	Down
lnc-protein	317.658	interacts with	-7.22361	AFAP1-AS1 (interacts with) CASP3	FALSE	interacts with	AFAP1-AS1 (interacts with) CASP3	Down
lnc-protein	408.142	interacts with	-7.22361	AFAP1-AS1 (interacts with) BCL2	FALSE	interacts with	AFAP1-AS1 (interacts with) BCL2	Down
lnc-protein	228.857	interacts with	-7.22361	AFAP1-AS1 (interacts with) BAX	FALSE	interacts with	AFAP1-AS1 (interacts with) BAX	Down
lnc-protein	249.223	interacts with	-7.22361	AFAP1-AS1 (interacts with) AKT1	FALSE	interacts with	AFAP1-AS1 (interacts with) AKT1	Down
lnc-protein	272	interacts with	-7.22361	AFAP1-AS1 (interacts with) TWIST1	FALSE	interacts with	AFAP1-AS1 (interacts with) TWIST1	Down

## Sheet: lncRNA-miRNA pairs
connection	EdgeBetweenness	interaction	logfc	name	selected	shared interaction	shared name	udn
lnc-mirna	114.059	interacts with	-2.48962	ZFAS1 (interacts with) MIR1271	FALSE	interacts with	ZFAS1 (interacts with) MIR1271	Down
lnc-mirna	272	interacts with	-2.48962	ZFAS1 (interacts with) miR-135a-5p	FALSE	interacts with	ZFAS1 (interacts with) miR-135a-5p	Down
lnc-mirna	114.059	interacts with	-2.48962	ZFAS1 (interacts with) MIR150	FALSE	interacts with	ZFAS1 (interacts with) MIR150	Down
lnc-mirna	140.456	interacts with	-2.48962	ZFAS1 (interacts with) miR-7-5p	FALSE	interacts with	ZFAS1 (interacts with) miR-7-5p	Down
lnc-mirna	272	interacts with	-2.48962	ZFAS1 (interacts with) MIR10A	FALSE	interacts with	ZFAS1 (interacts with) MIR10A	Down
lnc-mirna	272	interacts with	-2.29114	SNHG16 (interacts with) MIR146A	FALSE	interacts with	SNHG16 (interacts with) MIR146A	Down
lnc-mirna	1064	interacts with	-2.29114	SNHG16 (interacts with) MIR140	FALSE	interacts with	SNHG16 (interacts with) MIR140	Down
lnc-mirna	804	interacts with	-6.23323	SNHG12 (interacts with) miR-129-5p	FALSE	interacts with	SNHG12 (interacts with) miR-129-5p	Down
lnc-mirna	272	interacts with	-6.23323	SNHG12 (interacts with) miRâ€‘16	FALSE	interacts with	SNHG12 (interacts with) miRâ€‘16	Down
lnc-mirna	152.231	interacts with	-6.99085	SNHG1 (interacts with) MIR129-1	FALSE	interacts with	SNHG1 (interacts with) MIR129-1	Down
lnc-mirna	111.56	interacts with	-6.99085	SNHG1 (interacts with) MIR154	FALSE	interacts with	SNHG1 (interacts with) MIR154	Down
lnc-mirna	272	interacts with	-6.99085	SNHG1 (interacts with) miR-376a	FALSE	interacts with	SNHG1 (interacts with) miR-376a	Down
lnc-mirna	272	interacts with	-6.99085	SNHG1 (interacts with) miR-181b	FALSE	interacts with	SNHG1 (interacts with) miR-181b	Down
lnc-mirna	272	interacts with	-6.99085	SNHG1 (interacts with) miR-153-3p	FALSE	interacts with	SNHG1 (interacts with) miR-153-3p	Down
lnc-mirna	176.099	interacts with	-6.99085	SNHG1 (interacts with) miR-16-5p	FALSE	interacts with	SNHG1 (interacts with) miR-16-5p	Down
lnc-mirna	425.156	interacts with	-6.99085	SNHG1 (interacts with) MIR140	FALSE	interacts with	SNHG1 (interacts with) MIR140	Down
lnc-mirna	152.231	interacts with	-6.99085	SNHG1 (interacts with) miR-101-3p	FALSE	interacts with	SNHG1 (interacts with) miR-101-3p	Down
lnc-mirna	401.987	interacts with	-6.99085	SNHG1 (interacts with) MIR145	FALSE	interacts with	SNHG1 (interacts with) MIR145	Down
lnc-mirna	272	interacts with	-6.99085	SNHG1 (interacts with) miR-15b	FALSE	interacts with	SNHG1 (interacts with) miR-15b	Down
lnc-mirna	169.709	interacts with	-6.99085	SNHG1 (interacts with) miR-101	FALSE	interacts with	SNHG1 (interacts with) miR-101	Down
lnc-mirna	169.246	interacts with	-1.41991	NEAT1 (interacts with) miR-124	FALSE	interacts with	NEAT1 (interacts with) miR-124	Down
lnc-mirna	272	interacts with	-1.41991	NEAT1 (interacts with) Mir148a	FALSE	interacts with	NEAT1 (interacts with) Mir148a	Down
lnc-mirna	272	interacts with	-1.41991	NEAT1 (interacts with) MIR1277	FALSE	interacts with	NEAT1 (interacts with) MIR1277	Down
lnc-mirna	272	interacts with	-1.41991	NEAT1 (interacts with) miR-195a	FALSE	interacts with	NEAT1 (interacts with) miR-195a	Down
lnc-mirna	272	interacts with	-1.41991	NEAT1 (interacts with) MIR146B	FALSE	interacts with	NEAT1 (interacts with) MIR146B	Down
lnc-mirna	204.105	interacts with	-1.41991	NEAT1 (interacts with) miR-16-5p	FALSE	interacts with	NEAT1 (interacts with) miR-16-5p	Down
lnc-mirna	169.246	interacts with	-1.41991	NEAT1 (interacts with) MIR142	FALSE	interacts with	NEAT1 (interacts with) MIR142	Down
lnc-mirna	355.175	interacts with	-1.41991	NEAT1 (interacts with) miR-129-5p	FALSE	interacts with	NEAT1 (interacts with) miR-129-5p	Down
lnc-mirna	278.358	interacts with	-1.41991	NEAT1 (interacts with) MIR107	FALSE	interacts with	NEAT1 (interacts with) MIR107	Down
lnc-mirna	272	interacts with	-1.41991	NEAT1 (interacts with) miRâ€133a	FALSE	interacts with	NEAT1 (interacts with) miRâ€133a	Down
lnc-mirna	213.874	interacts with	-1.41991	NEAT1 (interacts with) miR-101-3p	FALSE	interacts with	NEAT1 (interacts with) miR-101-3p	Down
lnc-mirna	272	interacts with	-1.41991	NEAT1 (interacts with) MIR128	FALSE	interacts with	NEAT1 (interacts with) MIR128	Down
lnc-mirna	272	interacts with	-1.41991	NEAT1 (interacts with) MIR132	FALSE	interacts with	NEAT1 (interacts with) MIR132	Down
lnc-mirna	438.051	interacts with	-1.41991	NEAT1 (interacts with) MIR148A	FALSE	interacts with	NEAT1 (interacts with) MIR148A	Down
lnc-mirna	694.544	interacts with	-1.41991	NEAT1 (interacts with) MIR145	FALSE	interacts with	NEAT1 (interacts with) MIR145	Down
lnc-mirna	213.874	interacts with	-1.41991	NEAT1 (interacts with) MIR129-1	FALSE	interacts with	NEAT1 (interacts with) MIR129-1	Down
lnc-mirna	272	interacts with	-1.41991	NEAT1 (interacts with) miR-194	FALSE	interacts with	NEAT1 (interacts with) miR-194	Down
lnc-mirna	272	interacts with	-1.41991	NEAT1 (interacts with) Mir122	FALSE	interacts with	NEAT1 (interacts with) Mir122	Down
lnc-mirna	272	interacts with	-1.41991	NEAT1 (interacts with) miR-181d-5p	FALSE	interacts with	NEAT1 (interacts with) miR-181d-5p	Down
lnc-mirna	271.084	interacts with	-1.41991	NEAT1 (interacts with) miR-101	FALSE	interacts with	NEAT1 (interacts with) miR-101	Down
lnc-mirna	169.246	interacts with	-1.41991	NEAT1 (interacts with) Mir129	FALSE	interacts with	NEAT1 (interacts with) Mir129	Down
lnc-mirna	171.784	interacts with	-6.9041	MEG3 (interacts with) MIR143	FALSE	interacts with	MEG3 (interacts with) MIR143	Down
lnc-mirna	272	interacts with	-6.9041	MEG3 (interacts with) miR-424-5p	FALSE	interacts with	MEG3 (interacts with) miR-424-5p	Down
lnc-mirna	272	interacts with	-6.9041	MEG3 (interacts with) miR-218	FALSE	interacts with	MEG3 (interacts with) miR-218	Down
lnc-mirna	270.621	interacts with	-6.9041	MEG3 (interacts with) miR-7-5p	FALSE	interacts with	MEG3 (interacts with) miR-7-5p	Down
lnc-mirna	264.492	interacts with	-6.9041	MEG3 (interacts with) MIR148A	FALSE	interacts with	MEG3 (interacts with) MIR148A	Down
lnc-mirna	366.124	interacts with	-6.9041	MEG3 (interacts with) MIR145	FALSE	interacts with	MEG3 (interacts with) MIR145	Down
lnc-mirna	272	interacts with	-6.9041	MEG3 (interacts with) MIR127	FALSE	interacts with	MEG3 (interacts with) MIR127	Down
lnc-mirna	545.119	interacts with	-6.9041	MEG3 (interacts with) MIR140	FALSE	interacts with	MEG3 (interacts with) MIR140	Down
lnc-mirna	272	interacts with	-6.9041	MALAT1 (interacts with) MIR141	FALSE	interacts with	MALAT1 (interacts with) MIR141	Down
lnc-mirna	311.436	interacts with	-6.9041	MALAT1 (interacts with) MIR143	FALSE	interacts with	MALAT1 (interacts with) MIR143	Down
lnc-mirna	272	interacts with	-6.9041	MALAT1 (interacts with) MIR101	FALSE	interacts with	MALAT1 (interacts with) MIR101	Down
lnc-mirna	276.584	interacts with	-6.9041	MALAT1 (interacts with) MIR126	FALSE	interacts with	MALAT1 (interacts with) MIR126	Down
lnc-mirna	329.856	interacts with	-6.9041	MALAT1 (interacts with) miR-101-3p	FALSE	interacts with	MALAT1 (interacts with) miR-101-3p	Down
lnc-mirna	915.363	interacts with	-6.9041	MALAT1 (interacts with) miR-129-5p	FALSE	interacts with	MALAT1 (interacts with) miR-129-5p	Down
lnc-mirna	272	interacts with	-6.9041	MALAT1 (interacts with) Mir141	FALSE	interacts with	MALAT1 (interacts with) Mir141	Down
lnc-mirna	335.26	interacts with	-6.9041	MALAT1 (interacts with) MIR1271	FALSE	interacts with	MALAT1 (interacts with) MIR1271	Down
lnc-mirna	269.659	interacts with	-6.9041	MALAT1 (interacts with) MIR154	FALSE	interacts with	MALAT1 (interacts with) MIR154	Down
lnc-mirna	1577.86	interacts with	-6.9041	MALAT1 (interacts with) MIR140	FALSE	interacts with	MALAT1 (interacts with) MIR140	Down
lnc-mirna	618.099	interacts with	-6.9041	MALAT1 (interacts with) MIR145	FALSE	interacts with	MALAT1 (interacts with) MIR145	Down
lnc-mirna	272	interacts with	-6.9041	MALAT1 (interacts with) miR-181a-5p	FALSE	interacts with	MALAT1 (interacts with) miR-181a-5p	Down
lnc-mirna	272	interacts with	-6.9041	MALAT1 (interacts with) miRâ€124â€3p	FALSE	interacts with	MALAT1 (interacts with) miRâ€124â€3p	Down
lnc-mirna	804	interacts with	-6.9041	MALAT1 (interacts with) MIR125B	FALSE	interacts with	MALAT1 (interacts with) MIR125B	Down
lnc-mirna	335.26	interacts with	-6.9041	MALAT1 (interacts with) MIR150	FALSE	interacts with	MALAT1 (interacts with) MIR150	Down
lnc-mirna	272	interacts with	-6.9041	MALAT1 (interacts with) Mir144	FALSE	interacts with	MALAT1 (interacts with) Mir144	Down
lnc-mirna	272	interacts with	-6.9041	MALAT1 (interacts with) miR-30	FALSE	interacts with	MALAT1 (interacts with) miR-30	Down
lnc-mirna	309.293	interacts with	-6.9041	MALAT1 (interacts with) Mir129	FALSE	interacts with	MALAT1 (interacts with) Mir129	Down
lnc-mirna	309.293	interacts with	-6.9041	MALAT1 (interacts with) miR-124	FALSE	interacts with	MALAT1 (interacts with) miR-124	Down
lnc-mirna	381.311	interacts with	-6.9041	MALAT1 (interacts with) MIR148A	FALSE	interacts with	MALAT1 (interacts with) MIR148A	Down
lnc-mirna	309.293	interacts with	-6.9041	MALAT1 (interacts with) MIR142	FALSE	interacts with	MALAT1 (interacts with) MIR142	Down
lnc-mirna	362.842	interacts with	-6.9041	MALAT1 (interacts with) miR-101	FALSE	interacts with	MALAT1 (interacts with) miR-101	Down
lnc-mirna	622.565	interacts with	-6.9041	MALAT1 (interacts with) MIR144	FALSE	interacts with	MALAT1 (interacts with) MIR144	Down
lnc-mirna	272	interacts with	-6.9041	MALAT1 (interacts with) miR-30b	FALSE	interacts with	MALAT1 (interacts with) miR-30b	Down
lnc-mirna	329.856	interacts with	-6.9041	MALAT1 (interacts with) MIR129-1	FALSE	interacts with	MALAT1 (interacts with) MIR129-1	Down
lnc-mirna	272	interacts with	-6.9041	MALAT1 (interacts with) MIR124-1	FALSE	interacts with	MALAT1 (interacts with) MIR124-1	Down
lnc-mirna	613.929	interacts with	-1.43408	KCNQ1OT1 (interacts with) MIR145	FALSE	interacts with	KCNQ1OT1 (interacts with) MIR145	Down
lnc-mirna	233.638	interacts with	-1.43408	KCNQ1OT1 (interacts with) MIR149	FALSE	interacts with	KCNQ1OT1 (interacts with) MIR149	Down
lnc-mirna	393.264	interacts with	-1.43408	KCNQ1OT1 (interacts with) MIR140	FALSE	interacts with	KCNQ1OT1 (interacts with) MIR140	Down
lnc-mirna	272	interacts with	-1.43408	KCNQ1OT1 (interacts with) miR-124-3p	FALSE	interacts with	KCNQ1OT1 (interacts with) miR-124-3p	Down
lnc-mirna	272	interacts with	-1.43408	KCNQ1OT1 (interacts with) miR-9	FALSE	interacts with	KCNQ1OT1 (interacts with) miR-9	Down
lnc-mirna	272	interacts with	-1.43408	KCNQ1OT1 (interacts with) Mir138-2	FALSE	interacts with	KCNQ1OT1 (interacts with) Mir138-2	Down
lnc-mirna	153.364	interacts with	-6.23323	HOTTIP (interacts with) miR-101	FALSE	interacts with	HOTTIP (interacts with) miR-101	Down
lnc-mirna	390.474	interacts with	1.64346	HOTAIR (interacts with) MIR149	FALSE	interacts with	HOTAIR (interacts with) MIR149	Up
lnc-mirna	272	interacts with	1.64346	HOTAIR (interacts with) miR-519a-3p	FALSE	interacts with	HOTAIR (interacts with) miR-519a-3p	Up
lnc-mirna	182.93	interacts with	1.64346	HOTAIR (interacts with) MIR126	FALSE	interacts with	HOTAIR (interacts with) MIR126	Up
lnc-mirna	223.595	interacts with	1.64346	HOTAIR (interacts with) MIR143	FALSE	interacts with	HOTAIR (interacts with) MIR143	Up
lnc-mirna	272	interacts with	1.64346	HOTAIR (interacts with) Mir125	FALSE	interacts with	HOTAIR (interacts with) Mir125	Up
lnc-mirna	402.549	interacts with	1.64346	HOTAIR (interacts with) MIR148A	FALSE	interacts with	HOTAIR (interacts with) MIR148A	Up
lnc-mirna	272	interacts with	1.64346	HOTAIR (interacts with) MIR148B	FALSE	interacts with	HOTAIR (interacts with) MIR148B	Up
lnc-mirna	272	interacts with	1.64346	HOTAIR (interacts with) miR-19	FALSE	interacts with	HOTAIR (interacts with) miR-19	Up
lnc-mirna	272	interacts with	6.82992	HCP5 (interacts with) MIR128-1	FALSE	interacts with	HCP5 (interacts with) MIR128-1	Up
lnc-mirna	804	interacts with	6.82992	HCP5 (interacts with) MIR140	FALSE	interacts with	HCP5 (interacts with) MIR140	Up
lnc-mirna	272	interacts with	6.82992	HCP5 (interacts with) MIR139	FALSE	interacts with	HCP5 (interacts with) MIR139	Up
lnc-mirna	272	interacts with	-6.08336	GHET1 (interacts with) Mir105	FALSE	interacts with	GHET1 (interacts with) Mir105	Down
lnc-mirna	115.449	interacts with	2.39523	FEZF1-AS1 (interacts with) MIR144	FALSE	interacts with	FEZF1-AS1 (interacts with) MIR144	Up
lnc-mirna	97.5887	interacts with	2.39523	FEZF1-AS1 (interacts with) MIR107	FALSE	interacts with	FEZF1-AS1 (interacts with) MIR107	Up
lnc-mirna	361.322	interacts with	-1.41991	CASC2 (interacts with) MIR144	FALSE	interacts with	CASC2 (interacts with) MIR144	Down
lnc-mirna	540	interacts with	2.52017	BDNF-AS (interacts with) MIR125B	FALSE	interacts with	BDNF-AS (interacts with) MIR125B	Up
lnc-mirna	272	interacts with	2.52017	BDNF-AS (interacts with) Mir130b	FALSE	interacts with	BDNF-AS (interacts with) Mir130b	Up
lnc-mirna	272	interacts with	-7.22361	AFAP1-AS1 (interacts with) miR-512-3p	FALSE	interacts with	AFAP1-AS1 (interacts with) miR-512-3p	Down
lnc-mirna	821.052	interacts with	-7.22361	AFAP1-AS1 (interacts with) MIR145	FALSE	interacts with	AFAP1-AS1 (interacts with) MIR145	Down

## Sheet: lncRNA-mRNA pairs
connection	EdgeBetweenness	interaction	logfc	name	selected	shared interaction	shared name	udn
lnc-protein	413.477	interacts with	-2.48962	ZFAS1 (interacts with) ZEB1	FALSE	interacts with	ZFAS1 (interacts with) ZEB1	Down
lnc-protein	252.839	interacts with	-2.48962	ZFAS1 (interacts with) CDH1	FALSE	interacts with	ZFAS1 (interacts with) CDH1	Down
lnc-protein	272	interacts with	1.37014	SOX21-AS1 (interacts with) CDKN1C	FALSE	interacts with	SOX21-AS1 (interacts with) CDKN1C	Up
lnc-protein	540	interacts with	-2.29114	SNHG16 (interacts with) CDKN1C	FALSE	interacts with	SNHG16 (interacts with) CDKN1C	Down
lnc-protein	272	interacts with	-6.23323	SNHG12 (interacts with) MMP13	FALSE	interacts with	SNHG12 (interacts with) MMP13	Down
lnc-protein	451.062	interacts with	-6.99085	SNHG1 (interacts with) CDKN1A	FALSE	interacts with	SNHG1 (interacts with) CDKN1A	Down
lnc-protein	274.384	interacts with	-6.99085	SNHG1 (interacts with) TP53	FALSE	interacts with	SNHG1 (interacts with) TP53	Down
lnc-protein	272	interacts with	-4.48251	SFTA1P (interacts with) TP53	FALSE	interacts with	SFTA1P (interacts with) TP53	Down
lnc-protein	272	interacts with	-4.48251	RBM5-AS1 (interacts with) MYC	FALSE	interacts with	RBM5-AS1 (interacts with) MYC	Down
lnc-protein	272	interacts with	-1.41991	NEAT1 (interacts with) Mmp13	FALSE	interacts with	NEAT1 (interacts with) Mmp13	Down
lnc-protein	693.613	interacts with	-1.41991	NEAT1 (interacts with) ZEB1	FALSE	interacts with	NEAT1 (interacts with) ZEB1	Down
lnc-protein	479.846	interacts with	-1.41991	NEAT1 (interacts with) EZH2	FALSE	interacts with	NEAT1 (interacts with) EZH2	Down
lnc-protein	272	interacts with	-5.91609	MIR31HG (interacts with) P21	FALSE	interacts with	MIR31HG (interacts with) P21	Down
lnc-protein	98.7858	interacts with	-5.91609	MIR31HG (interacts with) HIF1A	FALSE	interacts with	MIR31HG (interacts with) HIF1A	Down
lnc-protein	474.775	interacts with	-5.91609	MIR31HG (interacts with) CDKN1A	FALSE	interacts with	MIR31HG (interacts with) CDKN1A	Down
lnc-protein	293.688	interacts with	-6.9041	MEG3 (interacts with) EZH2	FALSE	interacts with	MEG3 (interacts with) EZH2	Down
lnc-protein	244.043	interacts with	-6.9041	MEG3 (interacts with) TP53	FALSE	interacts with	MEG3 (interacts with) TP53	Down
lnc-protein	193.992	interacts with	-6.9041	MEG3 (interacts with) CASP9	FALSE	interacts with	MEG3 (interacts with) CASP9	Down
lnc-protein	406.574	interacts with	-6.9041	MEG3 (interacts with) BCL2	FALSE	interacts with	MEG3 (interacts with) BCL2	Down
lnc-protein	272	interacts with	-6.9041	MEG3 (interacts with) MDM2	FALSE	interacts with	MEG3 (interacts with) MDM2	Down
lnc-protein	272	interacts with	-6.9041	MEG3 (interacts with) CASP8	FALSE	interacts with	MEG3 (interacts with) CASP8	Down
lnc-protein	238.164	interacts with	-6.9041	MEG3 (interacts with) CASP3	FALSE	interacts with	MEG3 (interacts with) CASP3	Down
lnc-protein	500.43	interacts with	-6.9041	MALAT1 (interacts with) ZEB1	FALSE	interacts with	MALAT1 (interacts with) ZEB1	Down
lnc-protein	430.156	interacts with	-6.9041	MALAT1 (interacts with) EZH2	FALSE	interacts with	MALAT1 (interacts with) EZH2	Down
lnc-protein	407.46	interacts with	-6.9041	MALAT1 (interacts with) MMP9	FALSE	interacts with	MALAT1 (interacts with) MMP9	Down
lnc-protein	350.811	interacts with	-6.9041	MALAT1 (interacts with) MMP2	FALSE	interacts with	MALAT1 (interacts with) MMP2	Down
lnc-protein	272	interacts with	-6.9041	MALAT1 (interacts with) MMP14	FALSE	interacts with	MALAT1 (interacts with) MMP14	Down
lnc-protein	272	interacts with	-6.9041	MALAT1 (interacts with) CDH5	FALSE	interacts with	MALAT1 (interacts with) CDH5	Down
lnc-protein	792.186	interacts with	-6.9041	MALAT1 (interacts with) CDH1	FALSE	interacts with	MALAT1 (interacts with) CDH1	Down
lnc-protein	335.029	interacts with	-6.9041	MALAT1 (interacts with) CASP9	FALSE	interacts with	MALAT1 (interacts with) CASP9	Down
lnc-protein	394.833	interacts with	-6.9041	MALAT1 (interacts with) CASP3	FALSE	interacts with	MALAT1 (interacts with) CASP3	Down
lnc-protein	695.765	interacts with	-6.9041	MALAT1 (interacts with) MYC	FALSE	interacts with	MALAT1 (interacts with) MYC	Down
lnc-protein	427.84	interacts with	-6.9041	MALAT1 (interacts with) CCND1	FALSE	interacts with	MALAT1 (interacts with) CCND1	Down
lnc-protein	471.952	interacts with	-6.9041	MALAT1 (interacts with) TP53	FALSE	interacts with	MALAT1 (interacts with) TP53	Down
lnc-protein	384.531	interacts with	-6.9041	MALAT1 (interacts with) CDKN1B	FALSE	interacts with	MALAT1 (interacts with) CDKN1B	Down
lnc-protein	814.389	interacts with	-6.9041	MALAT1 (interacts with) CDKN1A	FALSE	interacts with	MALAT1 (interacts with) CDKN1A	Down
lnc-protein	351.182	interacts with	-6.9041	MALAT1 (interacts with) AKT1	FALSE	interacts with	MALAT1 (interacts with) AKT1	Down
lnc-protein	272	interacts with	-6.9041	MALAT1 (interacts with) ZEB2	FALSE	interacts with	MALAT1 (interacts with) ZEB2	Down
lnc-protein	272	interacts with	-5.91609	lncRNA-GHET1 (interacts with) MYC	FALSE	interacts with	lncRNA-GHET1 (interacts with) MYC	Down
lnc-protein	272	interacts with	-5.91609	LINC01116 (interacts with) VEGFA	FALSE	interacts with	LINC01116 (interacts with) VEGFA	Down
lnc-protein	155.708	interacts with	7.29588	HOXA-AS2 (interacts with) EZH2	FALSE	interacts with	HOXA-AS2 (interacts with) EZH2	Up
lnc-protein	141.648	interacts with	7.29588	HOXA-AS2 (interacts with) CDKN1A	FALSE	interacts with	HOXA-AS2 (interacts with) CDKN1A	Up
lnc-protein	141.639	interacts with	-6.23323	HOTTIP (interacts with) BCL2	FALSE	interacts with	HOTTIP (interacts with) BCL2	Down
lnc-protein	89.0123	interacts with	-6.23323	HOTTIP (interacts with) BAX	FALSE	interacts with	HOTTIP (interacts with) BAX	Down
lnc-protein	169.203	interacts with	-6.23323	HOTTIP (interacts with) CDKN1A	FALSE	interacts with	HOTTIP (interacts with) CDKN1A	Down
lnc-protein	272	interacts with	1.64346	HOTAIR (interacts with) RUNX3	FALSE	interacts with	HOTAIR (interacts with) RUNX3	Up
lnc-protein	269.602	interacts with	1.64346	HOTAIR (interacts with) MMP9	FALSE	interacts with	HOTAIR (interacts with) MMP9	Up
lnc-protein	495.233	interacts with	1.64346	HOTAIR (interacts with) CDKN1A	FALSE	interacts with	HOTAIR (interacts with) CDKN1A	Up
lnc-protein	426.436	interacts with	1.64346	HOTAIR (interacts with) EZH2	FALSE	interacts with	HOTAIR (interacts with) EZH2	Up
lnc-protein	391.151	interacts with	1.64346	HOTAIR (interacts with) TP53	FALSE	interacts with	HOTAIR (interacts with) TP53	Up
lnc-protein	249.29	interacts with	1.64346	HOTAIR (interacts with) AKT1	FALSE	interacts with	HOTAIR (interacts with) AKT1	Up
lnc-protein	272	interacts with	1.64346	HOTAIR (interacts with) RB1	FALSE	interacts with	HOTAIR (interacts with) RB1	Up
lnc-protein	310.548	interacts with	1.64346	HOTAIR (interacts with) CCNE1	FALSE	interacts with	HOTAIR (interacts with) CCNE1	Up
lnc-protein	499.347	interacts with	1.64346	HOTAIR (interacts with) ZEB1	FALSE	interacts with	HOTAIR (interacts with) ZEB1	Up
lnc-protein	246.109	interacts with	1.64346	HOTAIR (interacts with) MMP1	FALSE	interacts with	HOTAIR (interacts with) MMP1	Up
lnc-protein	540	interacts with	1.64346	HOTAIR (interacts with) VEGFA	FALSE	interacts with	HOTAIR (interacts with) VEGFA	Up
lnc-protein	329.225	interacts with	1.64346	HOTAIR (interacts with) HIF1A	FALSE	interacts with	HOTAIR (interacts with) HIF1A	Up
lnc-protein	477.584	interacts with	1.64346	HOTAIR (interacts with) CDH1	FALSE	interacts with	HOTAIR (interacts with) CDH1	Up
lnc-protein	296.026	interacts with	1.64346	HOTAIR (interacts with) CASP3	FALSE	interacts with	HOTAIR (interacts with) CASP3	Up
lnc-protein	447.447	interacts with	1.64346	HOTAIR (interacts with) BCL2	FALSE	interacts with	HOTAIR (interacts with) BCL2	Up
lnc-protein	272	interacts with	1.64346	HOTAIR (interacts with) ERBB2	FALSE	interacts with	HOTAIR (interacts with) ERBB2	Up
lnc-protein	325.928	interacts with	1.64346	HOTAIR (interacts with) PTEN	FALSE	interacts with	HOTAIR (interacts with) PTEN	Up
lnc-protein	540	interacts with	-6.08336	GHET1 (interacts with) CDH1	FALSE	interacts with	GHET1 (interacts with) CDH1	Down
lnc-protein	194.683	interacts with	2.39523	FEZF1-AS1 (interacts with) CDH1	FALSE	interacts with	FEZF1-AS1 (interacts with) CDH1	Up
lnc-protein	157.678	interacts with	5.94767	DBH-AS1 (interacts with) CDKN1B	FALSE	interacts with	DBH-AS1 (interacts with) CDKN1B	Up
lnc-protein	272	interacts with	5.94767	DBH-AS1 (interacts with) CDKN2A	FALSE	interacts with	DBH-AS1 (interacts with) CDKN2A	Up
lnc-protein	378.535	interacts with	5.94767	DBH-AS1 (interacts with) CDKN1A	FALSE	interacts with	DBH-AS1 (interacts with) CDKN1A	Up
lnc-protein	272	interacts with	5.94767	DBH-AS1 (interacts with) CDK6	FALSE	interacts with	DBH-AS1 (interacts with) CDK6	Up
lnc-protein	117.075	interacts with	5.94767	DBH-AS1 (interacts with) CCNE1	FALSE	interacts with	DBH-AS1 (interacts with) CCNE1	Up
lnc-protein	270.144	interacts with	5.94767	DBH-AS1 (interacts with) CCND1	FALSE	interacts with	DBH-AS1 (interacts with) CCND1	Up
lnc-protein	272	interacts with	-6.71317	CCDC26 (interacts with) BCL2	FALSE	interacts with	CCDC26 (interacts with) BCL2	Down
lnc-protein	185.203	interacts with	-1.41991	CASC2 (interacts with) PTEN	FALSE	interacts with	CASC2 (interacts with) PTEN	Down
lnc-protein	321.285	interacts with	-1.41991	CASC2 (interacts with) BCL2	FALSE	interacts with	CASC2 (interacts with) BCL2	Down
lnc-protein	272	interacts with	-1.41991	CASC2 (interacts with) RUNX1	FALSE	interacts with	CASC2 (interacts with) RUNX1	Down
lnc-protein	272	interacts with	-1.41991	CASC2 (interacts with) SOX4	FALSE	interacts with	CASC2 (interacts with) SOX4	Down
lnc-protein	134.786	interacts with	4.05277	BANCR (interacts with) MMP2	FALSE	interacts with	BANCR (interacts with) MMP2	Up
lnc-protein	78.058	interacts with	4.05277	BANCR (interacts with) MMP1	FALSE	interacts with	BANCR (interacts with) MMP1	Up
lnc-protein	220.857	interacts with	4.05277	BANCR (interacts with) CDKN1A	FALSE	interacts with	BANCR (interacts with) CDKN1A	Up
lnc-protein	272	interacts with	4.05277	BANCR (interacts with) ERK1	FALSE	interacts with	BANCR (interacts with) ERK1	Up
lnc-protein	151.192	interacts with	4.05277	BANCR (interacts with) MMP9	FALSE	interacts with	BANCR (interacts with) MMP9	Up
lnc-protein	175.993	interacts with	4.05277	BANCR (interacts with) CDH1	FALSE	interacts with	BANCR (interacts with) CDH1	Up
lnc-protein	597.814	interacts with	-7.22361	AFAP1-AS1 (interacts with) ZEB1	FALSE	interacts with	AFAP1-AS1 (interacts with) ZEB1	Down
lnc-protein	272	interacts with	-7.22361	AFAP1-AS1 (interacts with) VIM	FALSE	interacts with	AFAP1-AS1 (interacts with) VIM	Down
lnc-protein	272	interacts with	-7.22361	AFAP1-AS1 (interacts with) SOX2	FALSE	interacts with	AFAP1-AS1 (interacts with) SOX2	Down
lnc-protein	272	interacts with	-7.22361	AFAP1-AS1 (interacts with) SNAI2	FALSE	interacts with	AFAP1-AS1 (interacts with) SNAI2	Down
lnc-protein	272	interacts with	-7.22361	AFAP1-AS1 (interacts with) SNAI1	FALSE	interacts with	AFAP1-AS1 (interacts with) SNAI1	Down
lnc-protein	272	interacts with	-7.22361	AFAP1-AS1 (interacts with) SMAD2	FALSE	interacts with	AFAP1-AS1 (interacts with) SMAD2	Down
lnc-protein	272	interacts with	-7.22361	AFAP1-AS1 (interacts with) NES	FALSE	interacts with	AFAP1-AS1 (interacts with) NES	Down
lnc-protein	272	interacts with	-7.22361	AFAP1-AS1 (interacts with) NANOG	FALSE	interacts with	AFAP1-AS1 (interacts with) NANOG	Down
lnc-protein	272	interacts with	-7.22361	AFAP1-AS1 (interacts with) KRT1	FALSE	interacts with	AFAP1-AS1 (interacts with) KRT1	Down
lnc-protein	326.278	interacts with	-7.22361	AFAP1-AS1 (interacts with) MYC	FALSE	interacts with	AFAP1-AS1 (interacts with) MYC	Down
lnc-protein	297.409	interacts with	-7.22361	AFAP1-AS1 (interacts with) MMP9	FALSE	interacts with	AFAP1-AS1 (interacts with) MMP9	Down
lnc-protein	228.246	interacts with	-7.22361	AFAP1-AS1 (interacts with) MMP2	FALSE	interacts with	AFAP1-AS1 (interacts with) MMP2	Down
lnc-protein	297.289	interacts with	-7.22361	AFAP1-AS1 (interacts with) CCND1	FALSE	interacts with	AFAP1-AS1 (interacts with) CCND1	Down
lnc-protein	272.143	interacts with	-7.22361	AFAP1-AS1 (interacts with) PTEN	FALSE	interacts with	AFAP1-AS1 (interacts with) PTEN	Down
lnc-protein	272	interacts with	-7.22361	AFAP1-AS1 (interacts with) PARP1	FALSE	interacts with	AFAP1-AS1 (interacts with) PARP1	Down
lnc-protein	244.988	interacts with	-7.22361	AFAP1-AS1 (interacts with) CASP9	FALSE	interacts with	AFAP1-AS1 (interacts with) CASP9	Down
lnc-protein	317.658	interacts with	-7.22361	AFAP1-AS1 (interacts with) CASP3	FALSE	interacts with	AFAP1-AS1 (interacts with) CASP3	Down
lnc-protein	408.142	interacts with	-7.22361	AFAP1-AS1 (interacts with) BCL2	FALSE	interacts with	AFAP1-AS1 (interacts with) BCL2	Down
lnc-protein	228.857	interacts with	-7.22361	AFAP1-AS1 (interacts with) BAX	FALSE	interacts with	AFAP1-AS1 (interacts with) BAX	Down
lnc-protein	249.223	interacts with	-7.22361	AFAP1-AS1 (interacts with) AKT1	FALSE	interacts with	AFAP1-AS1 (interacts with) AKT1	Down
lnc-protein	272	interacts with	-7.22361	AFAP1-AS1 (interacts with) TWIST1	FALSE	interacts with	AFAP1-AS1 (interacts with) TWIST1	Down
